# Supplementary material for: Mapping protein interactions in the active TOM-TIM23 supercomplex
Source: PubMed Central journal article supplement (PMC8481542; doi:10.1038/s41467-021-26016-1), 2021-09-29
Supplement: 41467_2021_26016_MOESM1_ESM.pdf [file 41467_2021_26016_MOESM1_ESM.pdf]

## SUPPLEMENTARY INFORMATION

### Mapping protein interactions in the active TOM-TIM23 supercomplex

Ridhima Gomkale<sup>1</sup>, Andreas Linden<sup>2,3</sup>, Piotr Neumann<sup>4</sup>, Alexander Benjamin Schendzielorz<sup>1</sup>, Stefan Stoldt<sup>5,6</sup>, Olexandr Dybkov<sup>7</sup>, Markus Kilisch<sup>8</sup>, Christian Schulz<sup>1</sup>, Luis Daniel Cruz-Zaragoza<sup>1</sup>, Blanche Schwappach<sup>8</sup>, Ralf Ficner<sup>4,9</sup>, Stefan Jakobs<sup>5,6,9</sup>, Henning Urlaub<sup>2,3</sup>, Peter Rehling<sup>1,9,10\*</sup>

1 Department of Cellular Biochemistry, University Medical Center Göttingen, 37073 Göttingen, Germany

2 Department of Clinical Chemistry, University Medical Center Göttingen, 37075 Göttingen, Germany

3 Bioanalytical Mass Spectrometry Group, Max Planck Institute for Biophysical Chemistry, Am Fassberg 11, 37077 Göttingen, Germany

4 Department for Molecular Structural Biology, Georg-August-Universität Göttingen, 37077 Göttingen, Germany

5 Department of NanoBiophotonics, Max Planck Institute for Biophysical Chemistry, 37077 Göttingen, Germany

6 Clinic of Neurology, University Medical Center Göttingen, 37075 Göttingen, Germany

7 Cellular Biochemistry, Max Planck Institute for Biophysical Chemistry, Am Fassberg 11, 37077 Göttingen, Germany

8 Department of Molecular Biology, University Medical Center Göttingen, 37073 Göttingen, Germany

9 Cluster of Excellence "Multiscale Bioimaging: from Molecular Machines to Networks of Excitable Cells" (MBExC), University of Göttingen, Germany

10 Max Planck Institute for Biophysical Chemistry, 37077 Göttingen, Germany

\* Corresponding author and lead contact: [peter.rehling@medizin.uni-goettingen.de](mailto:peter.rehling@medizin.uni-goettingen.de)

#### **Content:**

Supplementary Figures 1 to 4

Supplementary Tables 1 to 4

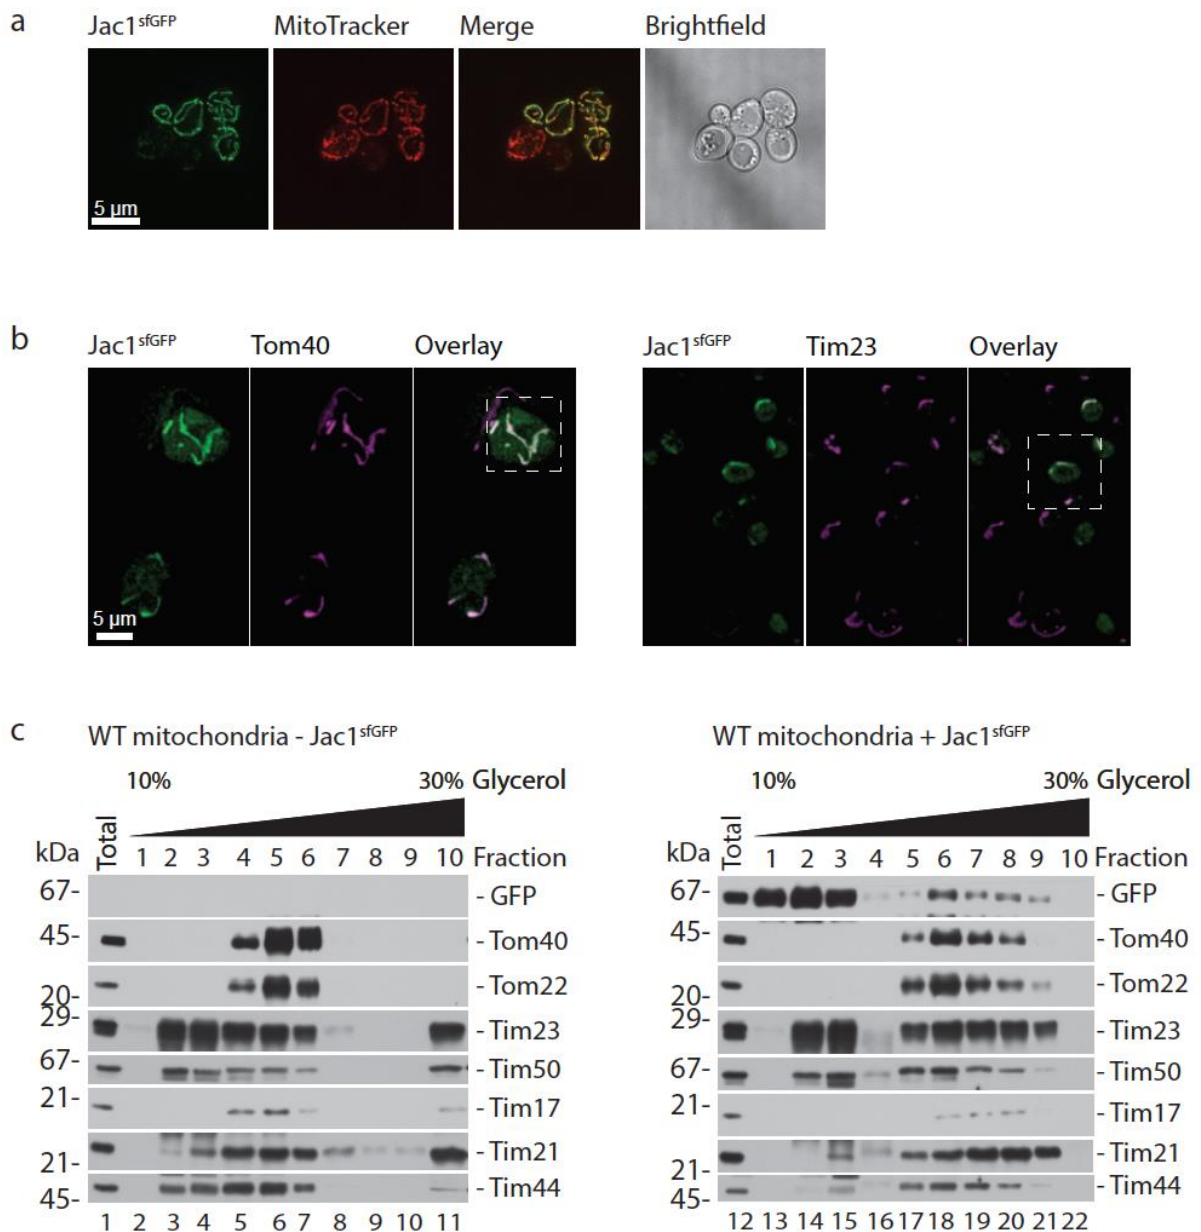

**Supplementary Fig. 1. Supercomplex-forming Jac1<sup>sfGFP</sup> localizes to mitochondria.** **a** Yeast cells were transformed with Jac1<sup>sfGFP</sup> (green)-encoding plasmid. After induction of expression, cells were co-stained with MitoTracker<sup>TM</sup> Orange CMTMRos (red). Merged green and red fluorescence images are shown, indicating co-localization (yellow). (Scale bar = 5 μm). Representative images from three independent experiments are depicted. **b** Two-colour confocal microscopy of yeast cells expressing Jac1<sup>sfGFP</sup>. Cells were labelled with antibodies against GFP (green) and Tom40 (magenta) or Tim23 (magenta). (Scale bar, 5 μm). Representative images from three biological replicates are depicted. **c** Solubilized wild type mitochondria were fractionated on 10-30% glycerol gradients following import of Jac1<sup>sfGFP</sup>. Fractions were collected from top, TCA precipitated, and analyzed by SDS-PAGE followed by western blotting. Total: 2% of mitochondria loaded on the gradient. Representative experiment from a biologic triplicate is shown.

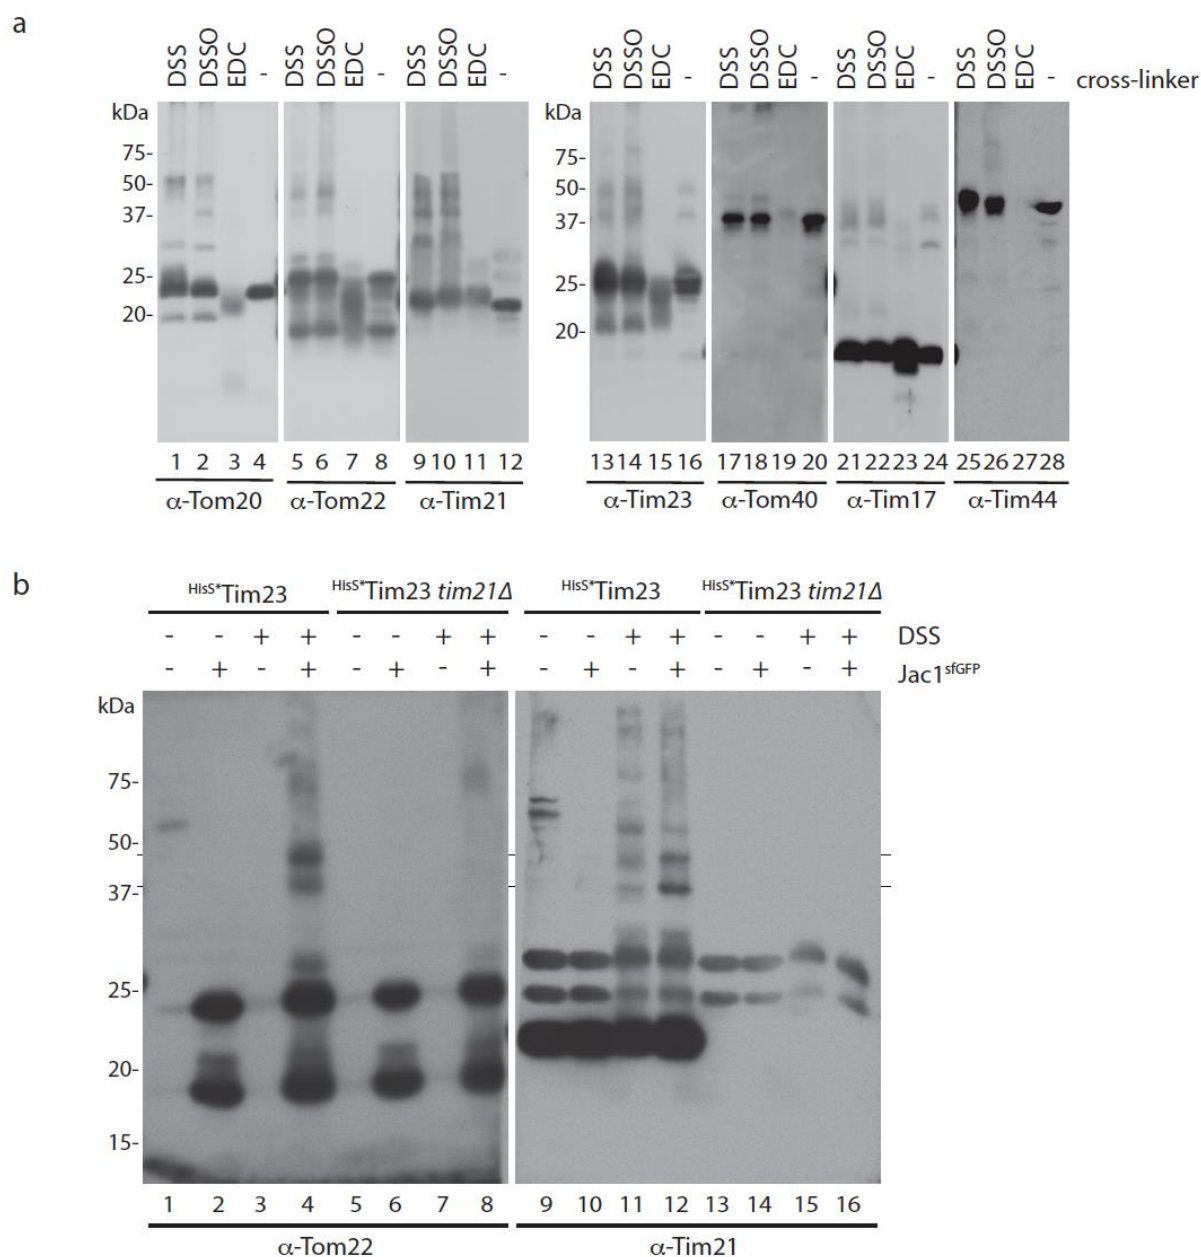

**Supplementary Fig. 2. Chemical cross-linking of supercomplex subunits. a** Supercomplex isolation was carried out from His<sup>S</sup>\*Tim23 mitochondria subjected to Jac1<sup>sfGFP</sup> import. Isolation was performed using SUMO\* protease. Isolated complex was treated with DMSO, 2 mM DSS, 2 mM DSSO and 10 mM EDC. Samples were analyzed by SDS-PAGE and western blotting. DSS: disuccinimidyl suberate, DSSO: disuccinimidyl sulfoxide, EDC: 1-Ethyl-3-(3-dimethylaminopropyl)carbodiimide. Three independent experiments were carried out. **b** TIM23 complex was isolated from His<sup>S</sup>\*Tim23 or His<sup>S</sup>\*Tim23 *tim21Δ* mitochondria in the absence or presence of Jac1<sup>sfGFP</sup>. Eluted samples were treated with DMSO or 2 mM DSS. Samples were analyzed by SDS-PAGE and western blotting. Three replicates were carried out.

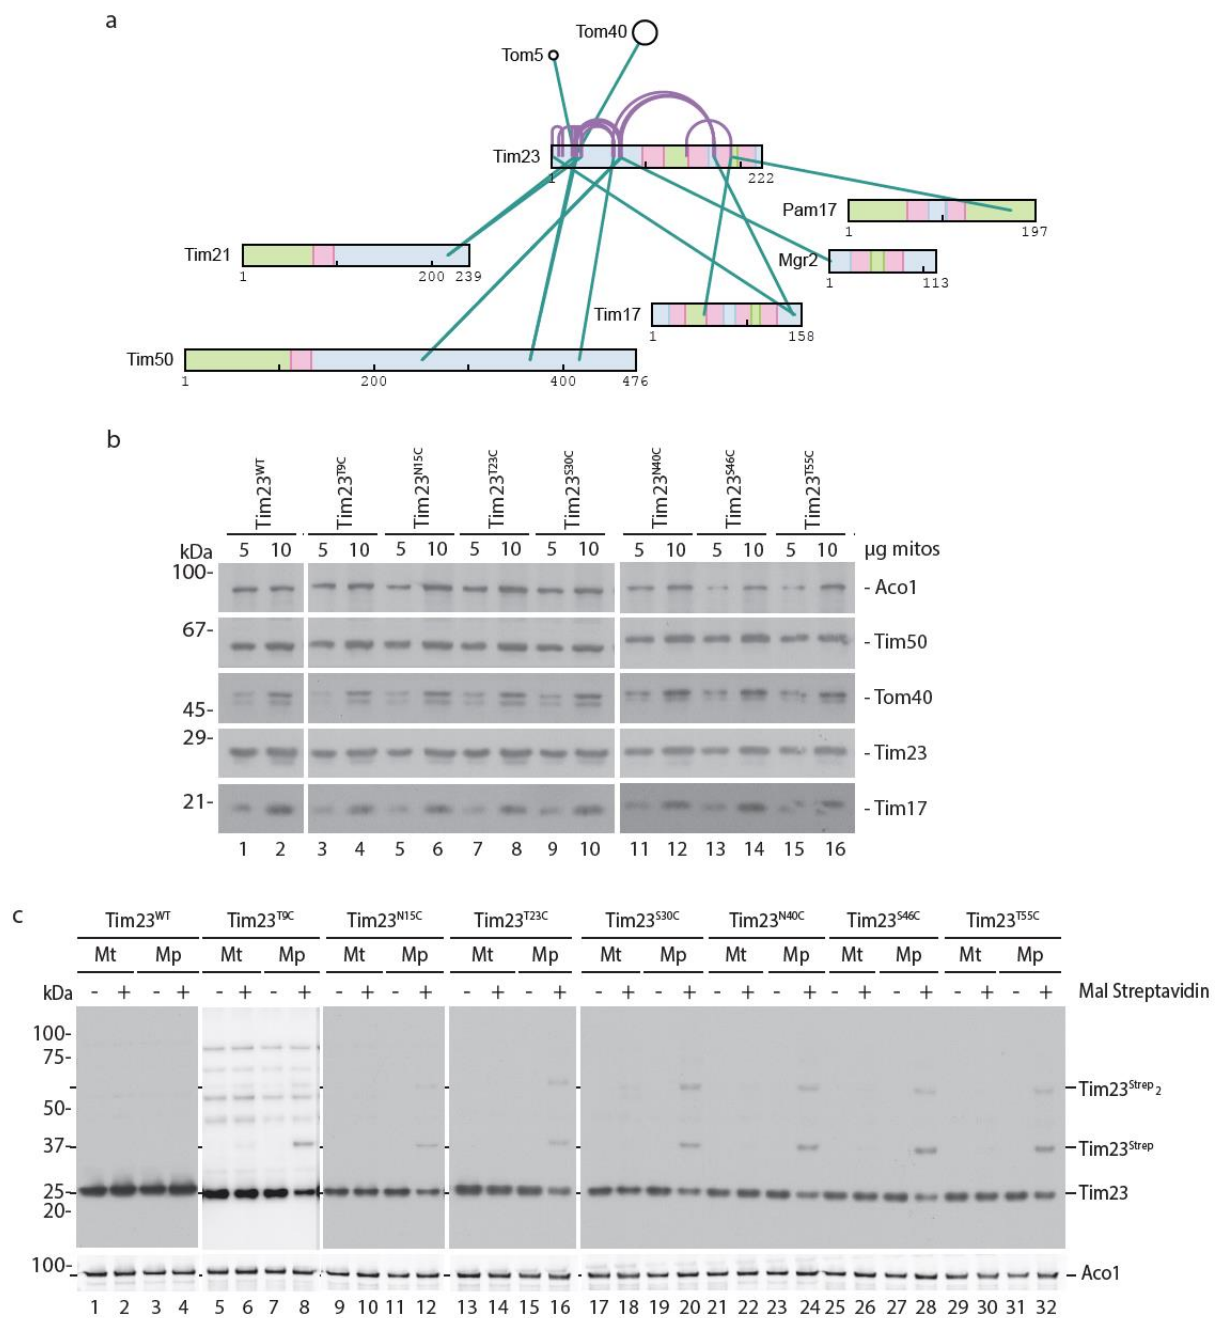

**Supplementary Fig. 3. Tim23 N-terminus localizes to the IMS.** **a** Overview of intra- and inter- protein cross-links obtained for Tim23. Colour code indicates domain location. blue: IMS, pink: IMM and green: matrix. **b** Purified mitochondria from wild type cells and cells expressing Tim23 cysteine mutants were subjected to SDS-PAGE and immunoblotting. Representative image from two independent experiments. **c** Cysteine modification assay for Tim23 was carried out in mitochondria and mitoplasts from wild type and Tim23 cysteine mutants in the presence or absence of maleimide streptavidin. Samples were subjected to SDS-PAGE and western blotting. Representative image from three replicates.

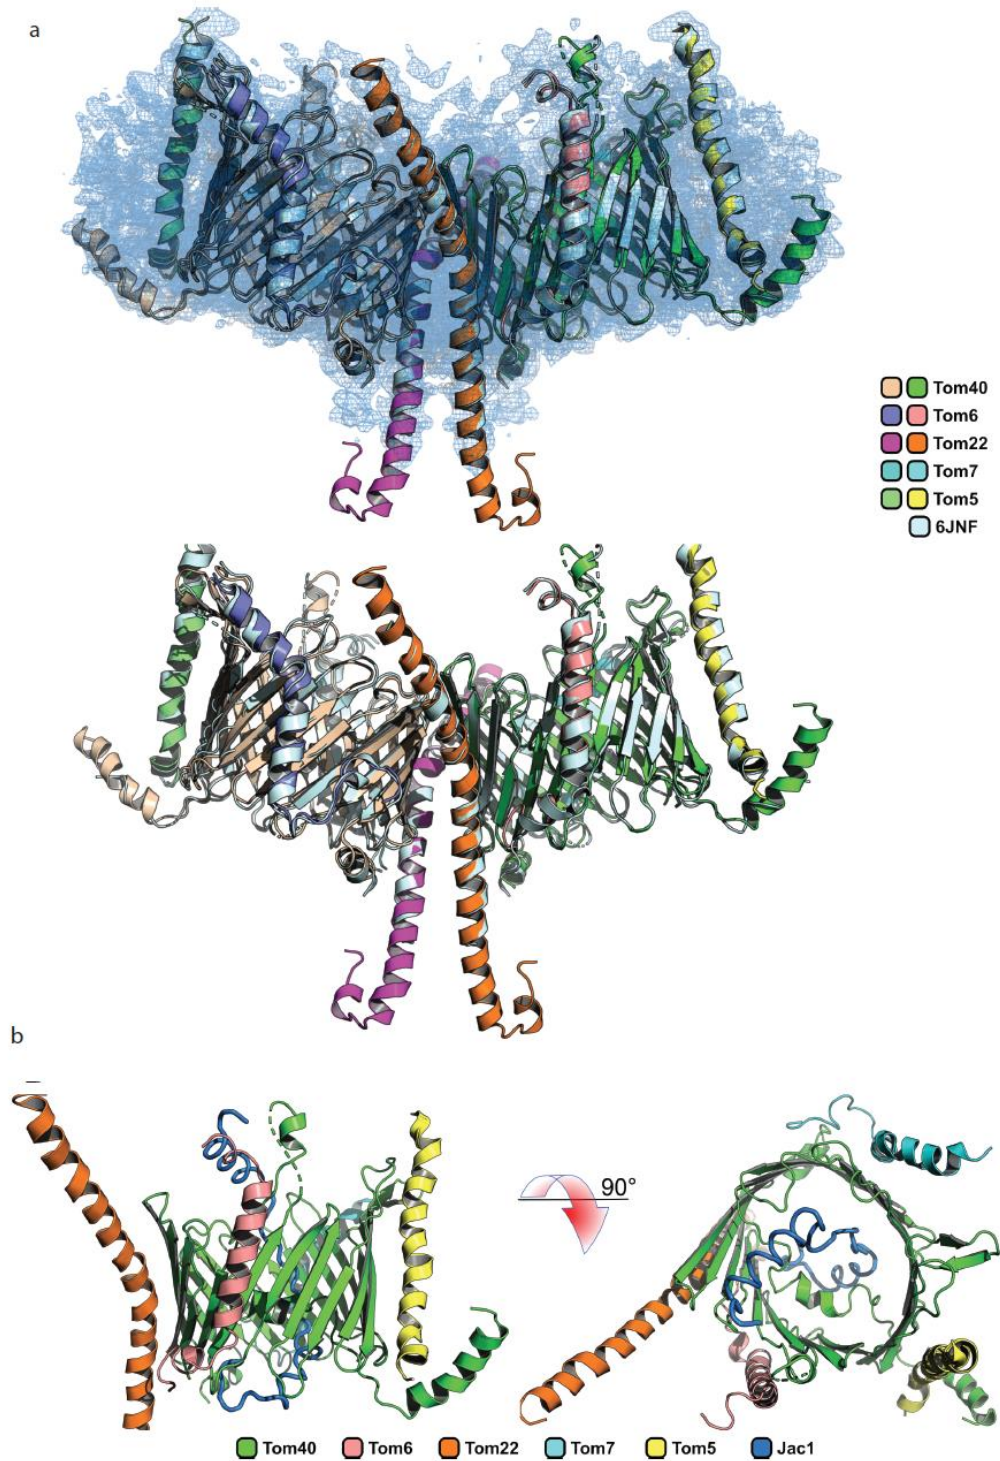

**Supplementary Fig. 4. Extended structure of the TOM complex.** **a** *de novo* extension of intermembrane space (IMS) domain of Tom22 (magenta and orange) based on available TOM complex structures (PDB id: 6JNF, EMD ID: 9851). Rosetta tools were utilized for extending the structure. Superposition of the published TOM complex atomic model (PDB id: 6JNF) supports the extended (modelled) TOM complex. **b** Single TOM complex subunit with front and top view. Colour code indicates individual subunits.

**Supplementary Table 1:** List of identical inter-protein cross-links obtained by three methods: 1) TIM23 complex isolation followed by cross-linking, 2) whole mitochondria *in organello* cross-linking, and 3) *in organello* cross-linking followed by TIM23 complex isolation, in resting (- Jac1<sup>sfGFP</sup>) or active (+ Jac1<sup>sfGFP</sup>) state.

| Cross-linker | Inter-protein cross-links                   | Approach 1<br>Isolation followed by<br>cross-linking |                         | Approach 2<br><i>in organello</i> cross-<br>linking |                         | Approach 3<br><i>in organello</i> cross-linking<br>followed by isolation |                         |
|--------------|---------------------------------------------|------------------------------------------------------|-------------------------|-----------------------------------------------------|-------------------------|--------------------------------------------------------------------------|-------------------------|
|              |                                             | - Jac1 <sup>sfGFP</sup>                              | + Jac1 <sup>sfGFP</sup> | - Jac1 <sup>sfGFP</sup>                             | + Jac1 <sup>sfGFP</sup> | - Jac1 <sup>sfGFP</sup>                                                  | + Jac1 <sup>sfGFP</sup> |
| EDC          | Tom70 <sup>103</sup> - Tom20 <sup>183</sup> | -                                                    | +                       | -                                                   | +                       | NA                                                                       | NA                      |
| EDC          | Tom5 <sup>1</sup> - Tom20 <sup>90</sup>     | -                                                    | +                       | -                                                   | +                       | NA                                                                       | NA                      |
| EDC          | Tom5 <sup>1</sup> - Tom20 <sup>182</sup>    | -                                                    | +                       | +                                                   | -                       | NA                                                                       | NA                      |
| EDC          | Tom5 <sup>1</sup> - Tom20 <sup>183</sup>    | -                                                    | +                       | +                                                   | -                       | NA                                                                       | NA                      |
| DSS          | Tim23 <sup>190</sup> - Tim17 <sup>55</sup>  | +                                                    | -                       | -                                                   | -                       | +                                                                        | -                       |
| DSS          | Hsp70 <sup>445</sup> - Mge1 <sup>104</sup>  | +                                                    | +                       | +                                                   | +                       | +                                                                        | +                       |
| DSS          | Hsp70 <sup>83</sup> - Mge1 <sup>119</sup>   | -                                                    | +                       | -                                                   | +                       | +                                                                        | +                       |
| DSS          | Hsp70 <sup>444</sup> - Tim44 <sup>228</sup> | -                                                    | +                       | -                                                   | -                       | -                                                                        | +                       |
| DSS          | Hsp70 <sup>514</sup> - Tim44 <sup>215</sup> | +                                                    | -                       | -                                                   | -                       | +                                                                        | -                       |
| DSS          | Hsp70 <sup>574</sup> - Tim44 <sup>198</sup> | +                                                    | +                       | -                                                   | -                       | +                                                                        | +                       |
| DSS          | Pam16 <sup>34</sup> - Pam18 <sup>101</sup>  | +                                                    | +                       | +                                                   | -                       | +                                                                        | +                       |
| DSS          | Pam16 <sup>89</sup> - Pam18 <sup>135</sup>  | -                                                    | +                       | -                                                   | -                       | -                                                                        | +                       |

-: cross-link not detected

+: cross-link detected

NA: not analyzed

**Supplementary Table 2:** List of yeast strains generated in this study.

| Strain                                     | Genotype                                                               |
|--------------------------------------------|------------------------------------------------------------------------|
| His <sup>S</sup> Tim23 <i>tim21</i> Δ      | His <sup>S</sup> Tim23 <i>tim21::TRP</i>                               |
| BY4741-pRG13                               | BY4741 + [pRG13-Jac1 <sup>sfGFP</sup> (LEU2)]                          |
| Tim21 <sup>FLAG</sup>                      | YPH499 <i>tim21::TIM21<sup>FLAG</sup></i> (HIS3)                       |
| Tim21 <sup>FLAG</sup> +Tim21 <sup>WT</sup> | YPH499 <i>tim21::TIM21<sup>FLAG</sup></i> (HIS3) + [pFL39-TIM21 (TRP)] |
| YPH499-pRG26                               | YPH499 + [pRG26 (TRP)]                                                 |
| YPH499-pRG27<br>(Tim23 <sup>ALFA</sup> )   | YPH499 + [pRG27-pTIM23 <sup>ALFA</sup> (TRP)]                          |
| YPH499-pRG28<br>(Tim17 <sup>ALFA</sup> )   | YPH499 + [pRG28-pTIM17 <sup>ALFA</sup> (TRP)]                          |
| YPH499-pRG30<br>(Tim50 <sup>ALFA</sup> )   | YPH499 + [pRG30-pTIM50 <sup>ALFA</sup> (TRP)]                          |
| YPH499-pRG33<br>(Tim44 <sup>ALFA</sup> )   | YPH499 + [pRG33-pTIM44 <sup>ALFA</sup> (TRP)]                          |
| YPH499-pRG35<br>(Pam18 <sup>ALFA</sup> )   | YPH499 + [pRG35-pPAM18 <sup>ALFA</sup> (TRP)]                          |
| YPH499-pRG37<br>(Pam16 <sup>ALFA</sup> )   | YPH499 + [pRG37-pPAM16 <sup>ALFA</sup> (TRP)]                          |
| YPH499-R673<br>(Tim23 <sup>WT</sup> )      | MB29 <i>tim23</i> Δ + [pRS413-pORFt TIM23 (HIS3)]                      |
| YPH499-pRG39<br>(Tim23 <sup>T9C</sup> )    | MB29 <i>tim23</i> Δ + [pRS413-pORFt TIM23 T9C (HIS3)]                  |
| YPH499-pRG40<br>(Tim23 <sup>N15C</sup> )   | MB29 <i>tim23</i> Δ + [pRS413-pORFt TIM23 N15C (HIS3)]                 |
| YPH499-pRG41<br>(Tim23 <sup>T23C</sup> )   | MB29 <i>tim23</i> Δ + [pRS413-pORFt TIM23 T23C (HIS3)]                 |
| YPH499-pRG42<br>(Tim23 <sup>S30C</sup> )   | MB29 <i>tim23</i> Δ + [pRS413-pORFt TIM23 S30C (HIS3)]                 |
| YPH499-pRG44<br>(Tim23 <sup>N40C</sup> )   | MB29 <i>tim23</i> Δ + [pRS413-pORFt TIM23 N40C (HIS3)]                 |
| YPH499-pRG45<br>(Tim23 <sup>S46C</sup> )   | MB29 <i>tim23</i> Δ + [pRS413-pORFt TIM23 S46C (HIS3)]                 |
| YPH499-pRG46<br>(Tim23 <sup>T55C</sup> )   | MB29 <i>tim23</i> Δ + [pRS413-pORFt TIM23 T55C (HIS3)]                 |

**Supplementary Table 3:** List of plasmids used in this study.

| <b>Plasmids</b>                | <b>Description</b>                                     |
|--------------------------------|--------------------------------------------------------|
| GST-nGFP-Strep (R286)          | GST-Thrombin-GFP Nanobody-Strep in pGEX-4T3 (Amp)      |
| pRG9                           | 14HIS-SUMO-Jac1 <sup>sfGFP Q7R</sup> in pSUMO (Kan)    |
| Tim44 <sup>C-term</sup> (R662) | Tim44 residues 244-431 in pPROEX HTc (Amp)             |
| Tim44 (1014)                   | Tim44 full length (without presequence) in pQE60 (Amp) |
| pRG13                          | Jac1 <sup>sfGFP Q7R</sup> in p425Gal1 (Amp, LEU2)      |
| pRG26                          | ALFA-ALDH terminator in pRS414 (Amp, TRP1)             |
| pRG27                          | Tim23 in pRG26 (Amp, TRP1)                             |
| pRG28                          | Tim17 in pRG26 (Amp, TRP1)                             |
| pRG30                          | Tim50 in pRG26 (Amp, TRP1)                             |
| pRG33                          | Tim44 in pRG26 (Amp, TRP1)                             |
| pRG35                          | Pam18 in pRG26 (Amp, TRP1)                             |
| pRG37                          | Pam16 in pRG26 (Amp, TRP1)                             |
| pFL39 (R84)                    | empty vector for yeast expression (Amp, TRP1)          |
| pGB 9607-7 (R85)               | Tim21 in pFL39 for expression in yeast (Amp, TRP1)     |
| R673                           | pORFt Tim23 in pRS413 (Amp, HIS3)                      |
| pRG39                          | pORFt Tim23 T9C in pRS413 (Amp, HIS3)                  |
| pRG40                          | pORFt Tim23 N15C in pRS413 (Amp, HIS3)                 |
| pRG41                          | pORFt Tim23 T23C in pRS413 (Amp, HIS3)                 |
| pRG42                          | pORFt Tim23 S30C in pRS413 (Amp, HIS3)                 |
| pRG44                          | pORFt Tim23 N40C in pRS413 (Amp, HIS3)                 |
| pRG45                          | pORFt Tim23 S46C in pRS413 (Amp, HIS3)                 |
| pRG46                          | pORFt Tim23 T55C in pRS413 (Amp, HIS3)                 |



**Supplementary Table 4:** Antibodies used in this study.

| <b>Antibody</b>                  | <b>Source</b>                | <b>Identifier</b> | <b>Dilution</b> |
|----------------------------------|------------------------------|-------------------|-----------------|
| GFP (western blot)               | Roche                        | 11814460001       | 1:1000          |
| GFP (microscopy)                 | Thermo Fisher Scientific     | A-11120           |                 |
| Anti-ALFA HRP-conjugated         | NanoTag Biotechnologies      | N1502-HRP         | 1:500           |
| FLAG                             | Sigma                        | F3165             | 1:500           |
| Peroxidase Streptavidin (SA-HRP) | Jackson ImmunoResearch Lab   | 016-030-084       | 1:500           |
| Goat anti Rabbit IgG (H+L) HRPO  | Jackson ImmunoResearch Lab   | 111-035-144       | 1:10,000        |
| Tim23                            | Rabbit polyclonal, self-made | 3846              | 1:500           |
| Tim23 <sup>IMS</sup>             | Rabbit polyclonal, self-made | 133               | 1:750           |
| Tim17                            | Rabbit polyclonal, self-made | 4968              | 1:200           |
| Tim50                            | Rabbit polyclonal, self-made | 3314              | 1:400           |
| Tim21                            | Rabbit polyclonal, self-made | 3111              | 1:400           |
| Tim44                            | Rabbit polyclonal, self-made | 3869              | 1:250           |
| Hsp70                            | Rabbit polyclonal, self-made | 4945              | 1:50,000        |
| Pam16                            | Rabbit polyclonal, self-made | 3872              | 1:200           |
| Pam18                            | Rabbit polyclonal, self-made | 3955              | 1:200           |
| Pam17                            | Rabbit polyclonal, self-made | 5017              | 1:400           |
| Tom70                            | Rabbit polyclonal, self-made | 3530              | 1:400           |
| Tom40                            | Rabbit polyclonal, self-made | 4901              | 1:200           |
| Tom22                            | Rabbit polyclonal, self-made | 3533              | 1:400           |
| Tom20                            | Rabbit polyclonal, self-made | 3534              | 1:400           |
| Tom5                             | Rabbit polyclonal, self-made | 162               | 1:500           |
| Aco1                             | Rabbit polyclonal, self-made | 5004              | 1:500           |
