# Supplementary material for: Mapping protein interactions in the active TOM-TIM23 supercomplex
Source: Nat Commun. 2021 Sep 29;12:5715. doi: 10.1038/s41467-021-26016-1 (PMC8481542; doi:10.1038/s41467-021-26016-1)
Supplement: Supplementary file 2 — Dataset 1 [file 41467_2021_26016_MOESM2_ESM.xlsx]

## Sheet: Approach description
Approach number		Description
1		TIM23 complex isolation followed by DSS, EDC or SDA cross-linking
2		in organello DSS or EDC cross-linking
3		in organello DSS cross-linking followed by TIM23 complex isolation

## Sheet: DSS_pLink1_approach 1
blocking-protein	Cross-Linker	#	#,Spec	Calc_M	Delta_M	Dimer	Evaluation	File	Inter	Intra_Inter	Mod_Sites	Ori_Score	Peptide	Protein 1	Protein 2	Protein1	Protein2	Proteins	CSMs	Residue1	Residue2	Scan	Score	Spectrum	TITLE	ppm
yes	DSS	251	1251	2028.1	0.00076	0	R	Z:\alinden\DATA\2017\06_Jun\170619[Ridhima_TOMTIM]w and wo blocking protein\RAW\TOMTIM+\R_Gomkale_Linden_TOMTIM+_A12.raw;	0	Intra	null	0.000785	AFKDWAPGK(3)-LLEKQNK(4):0	Jac1_YEAST	Jac1_YEAST	sp|P2|Jac1_YEAST	sp|P2|Jac1_YEAST	sp|P2|Jac1_YEAST(172)-sp|P2|Jac1_YEAST(129)	1	172	129	7657	3.11	6047;	File: "Z:\alinden\DATA\2017\06_Jun\170619[Ridhima_TOMTIM]w and wo blocking protein\RAW\TOMTIM+\R_Gomkale_Linden_TOMTIM+_A12.raw"; ID: "6047"; scans: "7657"	0.374548
yes	DSS	289	1289	1829.94	-0.00021	0	R	Z:\alinden\DATA\2017\06_Jun\170619[Ridhima_TOMTIM]w and wo blocking protein\RAW\TOMTIM+\R_Gomkale_Linden_TOMTIM+_A13.raw;	0	Intra	null	0.00679	AFKDWAPGK(3)-QNKER(3):0	Jac1_YEAST	Jac1_YEAST	sp|P2|Jac1_YEAST	sp|P2|Jac1_YEAST	sp|P2|Jac1_YEAST(172)-sp|P2|Jac1_YEAST(132)	2	172	132	5036	2.17	3600;	File: "Z:\alinden\DATA\2017\06_Jun\170619[Ridhima_TOMTIM]w and wo blocking protein\RAW\TOMTIM+\R_Gomkale_Linden_TOMTIM+_A13.raw"; ID: "3600"; scans: "5036"	-0.114695
yes	DSS	315	1315	1829.94	-0.00035	0	R	Z:\alinden\DATA\2017\06_Jun\170619[Ridhima_TOMTIM]w and wo blocking protein\RAW\TOMTIM+\R_Gomkale_Linden_TOMTIM+_A14.raw;	0	Intra	null	0.0241	AFKDWAPGK(3)-QNKER(3):0	Jac1_YEAST	Jac1_YEAST	sp|P2|Jac1_YEAST	sp|P2|Jac1_YEAST	sp|P2|Jac1_YEAST(172)-sp|P2|Jac1_YEAST(132)	2	172	132	4748	1.62	3281;	File: "Z:\alinden\DATA\2017\06_Jun\170619[Ridhima_TOMTIM]w and wo blocking protein\RAW\TOMTIM+\R_Gomkale_Linden_TOMTIM+_A14.raw"; ID: "3281"; scans: "4748"	-0.191158
yes	DSS	302	1302	3258.49	-0.00029	0	R	Z:\alinden\DATA\2017\06_Jun\170619[Ridhima_TOMTIM]w and wo blocking protein\RAW\TOMTIM+\R_Gomkale_Linden_TOMTIM+_A13.raw;	0	Intra	null	0.00483	AGDASTAKPPPNSTNSSGADNSASSNQ(8)-EKNAK(2):0	Pam16_YEAST	Pam16_YEAST	sp|P16|Pam16_YEAST	sp|P16|Pam16_YEAST	sp|P16|Pam16_YEAST(130)-sp|P16|Pam16_YEAST(117)	1	130	117	1983	2.32	740;	File: "Z:\alinden\DATA\2017\06_Jun\170619[Ridhima_TOMTIM]w and wo blocking protein\RAW\TOMTIM+\R_Gomkale_Linden_TOMTIM+_A13.raw"; ID: "740"; scans: "1983"	-0.088971
yes	DSS	299	1299	3457.62	-0.00079	0	G	Z:\alinden\DATA\2017\06_Jun\170619[Ridhima_TOMTIM]w and wo blocking protein\RAW\TOMTIM+\R_Gomkale_Linden_TOMTIM+_A13.raw;	0	Intra	null	0.000449	AKAGDASTAKPPPNSTNSSGADNSASSNQ(2)-EKNAK(2):0	Pam16_YEAST	Pam16_YEAST	sp|P16|Pam16_YEAST	sp|P16|Pam16_YEAST	sp|P16|Pam16_YEAST(122)-sp|P16|Pam16_YEAST(117)	2	122	117	1761	3.35	532;	File: "Z:\alinden\DATA\2017\06_Jun\170619[Ridhima_TOMTIM]w and wo blocking protein\RAW\TOMTIM+\R_Gomkale_Linden_TOMTIM+_A13.raw"; ID: "532"; scans: "1761"	-0.228414
yes	DSS	234	1234	3457.62	0.00398	0	G	Z:\alinden\DATA\2017\06_Jun\170619[Ridhima_TOMTIM]w and wo blocking protein\RAW\TOMTIM+\R_Gomkale_Linden_TOMTIM+_A12.raw;	0	Intra	null	0.000538	AKAGDASTAKPPPNSTNSSGADNSASSNQ(2)-EKNAK(2):0	Pam16_YEAST	Pam16_YEAST	sp|P16|Pam16_YEAST	sp|P16|Pam16_YEAST	sp|P16|Pam16_YEAST(122)-sp|P16|Pam16_YEAST(117)	2	122	117	1644	3.27	401;	File: "Z:\alinden\DATA\2017\06_Jun\170619[Ridhima_TOMTIM]w and wo blocking protein\RAW\TOMTIM+\R_Gomkale_Linden_TOMTIM+_A12.raw"; ID: "401"; scans: "1644"	1.15074
yes	DSS	319	1319	1325.8	5e-05	0	R	Z:\alinden\DATA\2017\06_Jun\170619[Ridhima_TOMTIM]w and wo blocking protein\RAW\TOMTIM+\R_Gomkale_Linden_TOMTIM+_A14.raw;	0	Intra	null	1.14e-06	AKEQAK(2)-KVLR(1):0	Tom20_YEAST	Tom20_YEAST	sp|P5|Tom20_YEAST	sp|P5|Tom20_YEAST	sp|P5|Tom20_YEAST(48)-sp|P5|Tom20_YEAST(41)	1	48	41	2039	5.94	748;	File: "Z:\alinden\DATA\2017\06_Jun\170619[Ridhima_TOMTIM]w and wo blocking protein\RAW\TOMTIM+\R_Gomkale_Linden_TOMTIM+_A14.raw"; ID: "748"; scans: "2039"	0.037684
yes	DSS	94	1,94	3241.75	-0.00543	0	G	Z:\alinden\DATA\2017\06_Jun\170619[Ridhima_TOMTIM]w and wo blocking protein\RAW\TOMTIM+\R_Gomkale_Linden_TOMTIM+_A11.raw;	0	Intra	null	4.52e-05	ALKDAGLSTSDISEVLLVGGMSR(3)-TVDPVKK(6):0	Hsp70Ssc1_YEAST	Hsp70Ssc1_YEAST	sp|P15|Hsp70Ssc1_YEAST	sp|P15|Hsp70Ssc1_YEAST	sp|P15|Hsp70Ssc1_YEAST(348)-sp|P15|Hsp70Ssc1_YEAST(344)	3	348	344	15701	4.34	13654;	File: "Z:\alinden\DATA\2017\06_Jun\170619[Ridhima_TOMTIM]w and wo blocking protein\RAW\TOMTIM+\R_Gomkale_Linden_TOMTIM+_A11.raw"; ID: "13654"; scans: "15701"	-1.6745
yes	DSS	50	1,50	3241.75	0.00873	0	G	Z:\alinden\DATA\2017\06_Jun\170619[Ridhima_TOMTIM]w and wo blocking protein\RAW\TOMTIM+\R_Gomkale_Linden_TOMTIM+_A10b.raw;	0	Intra	null	0.00196	ALKDAGLSTSDISEVLLVGGMSR(3)-TVDPVKK(6):0	Hsp70Ssc1_YEAST	Hsp70Ssc1_YEAST	sp|P15|Hsp70Ssc1_YEAST	sp|P15|Hsp70Ssc1_YEAST	sp|P15|Hsp70Ssc1_YEAST(348)-sp|P15|Hsp70Ssc1_YEAST(344)	3	348	344	15270	2.71	13426;	File: "Z:\alinden\DATA\2017\06_Jun\170619[Ridhima_TOMTIM]w and wo blocking protein\RAW\TOMTIM+\R_Gomkale_Linden_TOMTIM+_A10b.raw"; ID: "13426"; scans: "15270"	2.69215
yes	DSS	180	1180	3241.75	0.99271	0	G	Z:\alinden\DATA\2017\06_Jun\170619[Ridhima_TOMTIM]w and wo blocking protein\RAW\TOMTIM+\R_Gomkale_Linden_TOMTIM+_A12.raw;	0	Intra	null	0.00911	ALKDAGLSTSDISEVLLVGGMSR(3)-TVDPVKK(6):0	Hsp70Ssc1_YEAST	Hsp70Ssc1_YEAST	sp|P15|Hsp70Ssc1_YEAST	sp|P15|Hsp70Ssc1_YEAST	sp|P15|Hsp70Ssc1_YEAST(348)-sp|P15|Hsp70Ssc1_YEAST(344)	3	348	344	16795	2.04	14613;	File: "Z:\alinden\DATA\2017\06_Jun\170619[Ridhima_TOMTIM]w and wo blocking protein\RAW\TOMTIM+\R_Gomkale_Linden_TOMTIM+_A12.raw"; ID: "14613"; scans: "16795"	306.038
yes	DSS	381	1381	7181.7	4.00184	0	R	Z:\alinden\DATA\2017\06_Jun\170619[Ridhima_TOMTIM]w and wo blocking protein\RAW\TOMTIM+\R_Gomkale_Linden_TOMTIM+_A9.raw;	0	Intra	null	0.00766	ANFKIRHNVEDGSVQLADHYQQNTPIGDGPVLLPDNHYLSTQSVLSK(4)-TFPKKLPIWTIDQSR(5):0	Jac1_YEAST	Jac1_YEAST	sp|P2|Jac1_YEAST	sp|P2|Jac1_YEAST	sp|P2|Jac1_YEAST(351)-sp|P2|Jac1_YEAST(25)	1	351	25	21752	2.12	18472;	File: "Z:\alinden\DATA\2017\06_Jun\170619[Ridhima_TOMTIM]w and wo blocking protein\RAW\TOMTIM+\R_Gomkale_Linden_TOMTIM+_A9.raw"; ID: "18472"; scans: "21752"	556.839
yes	DSS	304	1304	2396.37	0.00194	0	G	Z:\alinden\DATA\2017\06_Jun\170619[Ridhima_TOMTIM]w and wo blocking protein\RAW\TOMTIM+\R_Gomkale_Linden_TOMTIM+_A13.raw;	0	Intra	null	2.64e-11	AQFETLTAPLVKR(12)-TVDPVKK(6):0	Hsp70Ssc1_YEAST	Hsp70Ssc1_YEAST	sp|P15|Hsp70Ssc1_YEAST	sp|P15|Hsp70Ssc1_YEAST	sp|P15|Hsp70Ssc1_YEAST(337)-sp|P15|Hsp70Ssc1_YEAST(344)	6	337	344	10479	10.58	8609;	File: "Z:\alinden\DATA\2017\06_Jun\170619[Ridhima_TOMTIM]w and wo blocking protein\RAW\TOMTIM+\R_Gomkale_Linden_TOMTIM+_A13.raw"; ID: "8609"; scans: "10479"	0.809218
yes	DSS	166	1166	2396.37	0.00212	0	G	Z:\alinden\DATA\2017\06_Jun\170619[Ridhima_TOMTIM]w and wo blocking protein\RAW\TOMTIM+\R_Gomkale_Linden_TOMTIM+_A11.raw;	0	Intra	null	7.43e-11	AQFETLTAPLVKR(12)-TVDPVKK(6):0	Hsp70Ssc1_YEAST	Hsp70Ssc1_YEAST	sp|P15|Hsp70Ssc1_YEAST	sp|P15|Hsp70Ssc1_YEAST	sp|P15|Hsp70Ssc1_YEAST(337)-sp|P15|Hsp70Ssc1_YEAST(344)	6	337	344	9781	10.13	8079;	File: "Z:\alinden\DATA\2017\06_Jun\170619[Ridhima_TOMTIM]w and wo blocking protein\RAW\TOMTIM+\R_Gomkale_Linden_TOMTIM+_A11.raw"; ID: "8079"; scans: "9781"	0.8843
yes	DSS	255	1255	2396.37	-0.00208	0	G	Z:\alinden\DATA\2017\06_Jun\170619[Ridhima_TOMTIM]w and wo blocking protein\RAW\TOMTIM+\R_Gomkale_Linden_TOMTIM+_A12.raw;	0	Intra	null	1.58e-10	AQFETLTAPLVKR(12)-TVDPVKK(6):0	Hsp70Ssc1_YEAST	Hsp70Ssc1_YEAST	sp|P15|Hsp70Ssc1_YEAST	sp|P15|Hsp70Ssc1_YEAST	sp|P15|Hsp70Ssc1_YEAST(337)-sp|P15|Hsp70Ssc1_YEAST(344)	6	337	344	10288	9.8	8517;	File: "Z:\alinden\DATA\2017\06_Jun\170619[Ridhima_TOMTIM]w and wo blocking protein\RAW\TOMTIM+\R_Gomkale_Linden_TOMTIM+_A12.raw"; ID: "8517"; scans: "10288"	-0.867616
yes	DSS	257	1257	2396.37	0.00204	0	R	Z:\alinden\DATA\2017\06_Jun\170619[Ridhima_TOMTIM]w and wo blocking protein\RAW\TOMTIM+\R_Gomkale_Linden_TOMTIM+_A12.raw;	0	Intra	null	1.67e-08	AQFETLTAPLVKR(12)-TVDPVKK(6):0	Hsp70Ssc1_YEAST	Hsp70Ssc1_YEAST	sp|P15|Hsp70Ssc1_YEAST	sp|P15|Hsp70Ssc1_YEAST	sp|P15|Hsp70Ssc1_YEAST(337)-sp|P15|Hsp70Ssc1_YEAST(344)	6	337	344	10451	7.78	8671;	File: "Z:\alinden\DATA\2017\06_Jun\170619[Ridhima_TOMTIM]w and wo blocking protein\RAW\TOMTIM+\R_Gomkale_Linden_TOMTIM+_A12.raw"; ID: "8671"; scans: "10451"	0.85093
yes	DSS	303	1303	2396.37	-0.00188	0	Y	Z:\alinden\DATA\2017\06_Jun\170619[Ridhima_TOMTIM]w and wo blocking protein\RAW\TOMTIM+\R_Gomkale_Linden_TOMTIM+_A13.raw;	0	Intra	null	2.75e-06	AQFETLTAPLVKR(12)-TVDPVKK(6):0	Hsp70Ssc1_YEAST	Hsp70Ssc1_YEAST	sp|P15|Hsp70Ssc1_YEAST	sp|P15|Hsp70Ssc1_YEAST	sp|P15|Hsp70Ssc1_YEAST(337)-sp|P15|Hsp70Ssc1_YEAST(344)	6	337	344	10461	5.56	8592;	File: "Z:\alinden\DATA\2017\06_Jun\170619[Ridhima_TOMTIM]w and wo blocking protein\RAW\TOMTIM+\R_Gomkale_Linden_TOMTIM+_A13.raw"; ID: "8592"; scans: "10461"	-0.784192
yes	DSS	256	1256	2396.37	-0.0026	0	Y	Z:\alinden\DATA\2017\06_Jun\170619[Ridhima_TOMTIM]w and wo blocking protein\RAW\TOMTIM+\R_Gomkale_Linden_TOMTIM+_A12.raw;	0	Intra	null	4.19e-06	AQFETLTAPLVKR(12)-TVDPVKK(6):0	Hsp70Ssc1_YEAST	Hsp70Ssc1_YEAST	sp|P15|Hsp70Ssc1_YEAST	sp|P15|Hsp70Ssc1_YEAST	sp|P15|Hsp70Ssc1_YEAST(337)-sp|P15|Hsp70Ssc1_YEAST(344)	6	337	344	10289	5.38	8518;	File: "Z:\alinden\DATA\2017\06_Jun\170619[Ridhima_TOMTIM]w and wo blocking protein\RAW\TOMTIM+\R_Gomkale_Linden_TOMTIM+_A12.raw"; ID: "8518"; scans: "10289"	-1.08452
yes	DSS	237	1237	2886.49	0.00194	0	G	Z:\alinden\DATA\2017\06_Jun\170619[Ridhima_TOMTIM]w and wo blocking protein\RAW\TOMTIM+\R_Gomkale_Linden_TOMTIM+_A12.raw;	0	Intra	null	6.57e-06	AVKSNEDAGTAVVATNIESK(3)-DLASGKR(6):0	Tim44_YEAST	Tim44_YEAST	sp|P14|Tim44_YEAST	sp|P14|Tim44_YEAST	sp|P14|Tim44_YEAST(198)-sp|P14|Tim44_YEAST(192)	1	198	192	5878	5.18	4375;	File: "Z:\alinden\DATA\2017\06_Jun\170619[Ridhima_TOMTIM]w and wo blocking protein\RAW\TOMTIM+\R_Gomkale_Linden_TOMTIM+_A12.raw"; ID: "4375"; scans: "5878"	0.671861
yes	DSS	132	1132	3162.63	1.00719	0	G	Z:\alinden\DATA\2017\06_Jun\170619[Ridhima_TOMTIM]w and wo blocking protein\RAW\TOMTIM+\R_Gomkale_Linden_TOMTIM+_A11.raw;	0	Intra	null	8.46e-07	AVKSNEDAGTAVVATNIESK(3)-KVEDFKEK(1):0	Tim44_YEAST	Tim44_YEAST	sp|P14|Tim44_YEAST	sp|P14|Tim44_YEAST	sp|P14|Tim44_YEAST(198)-sp|P14|Tim44_YEAST(221)	1	198	221	4495	6.07	3094;	File: "Z:\alinden\DATA\2017\06_Jun\170619[Ridhima_TOMTIM]w and wo blocking protein\RAW\TOMTIM+\R_Gomkale_Linden_TOMTIM+_A11.raw"; ID: "3094"; scans: "4495"	318.263
yes	DSS	283	1283	2158.14	0.00058	0	G	Z:\alinden\DATA\2017\06_Jun\170619[Ridhima_TOMTIM]w and wo blocking protein\RAW\TOMTIM+\R_Gomkale_Linden_TOMTIM+_A13.raw;	0	Intra	null	5.52e-12	AWESELGKNTR(8)-KAAAATAK(1):0	Tim44_YEAST	Tim44_YEAST	sp|P14|Tim44_YEAST	sp|P14|Tim44_YEAST	sp|P14|Tim44_YEAST(130)-sp|P14|Tim44_YEAST(134)	2	130	134	4623	11.26	3212;	File: "Z:\alinden\DATA\2017\06_Jun\170619[Ridhima_TOMTIM]w and wo blocking protein\RAW\TOMTIM+\R_Gomkale_Linden_TOMTIM+_A13.raw"; ID: "3212"; scans: "4623"	0.268625
yes	DSS	285	1285	2158.14	0.00174	0	G	Z:\alinden\DATA\2017\06_Jun\170619[Ridhima_TOMTIM]w and wo blocking protein\RAW\TOMTIM+\R_Gomkale_Linden_TOMTIM+_A13.raw;	0	Intra	null	1.15e-09	AWESELGKNTR(8)-KAAAATAK(1):0	Tim44_YEAST	Tim44_YEAST	sp|P14|Tim44_YEAST	sp|P14|Tim44_YEAST	sp|P14|Tim44_YEAST(130)-sp|P14|Tim44_YEAST(134)	2	130	134	4665	8.94	3252;	File: "Z:\alinden\DATA\2017\06_Jun\170619[Ridhima_TOMTIM]w and wo blocking protein\RAW\TOMTIM+\R_Gomkale_Linden_TOMTIM+_A13.raw"; ID: "3252"; scans: "4665"	0.805874
yes	DSS	467	1467	2021.02	1.98901	0	R	Z:\alinden\DATA\2017\06_Jun\170619[Ridhima_TOMTIM]w and wo blocking protein\RAW\TOMTIM+\R_Gomkale_Linden_TOMTIM+_B4.raw;	1	Inter	null	0.821	DTFKKEWEK(5)-QNKER(3):0	Tim44_YEAST	Jac1_YEAST	sp|P14|Tim44_YEAST	sp|P2|Jac1_YEAST	sp|P14|Tim44_YEAST(60)-sp|P2|Jac1_YEAST(132)	1	60	132	8546	0.09	2635;	File: "Z:\alinden\DATA\2017\06_Jun\170619[Ridhima_TOMTIM]w and wo blocking protein\RAW\TOMTIM+\R_Gomkale_Linden_TOMTIM+_B4.raw"; ID: "2635"; scans: "8546"	982.704
yes	DSS	410	1410	6722.42	1.06705	0	R	Z:\alinden\DATA\2017\06_Jun\170619[Ridhima_TOMTIM]w and wo blocking protein\RAW\TOMTIM+\R_Gomkale_Linden_TOMTIM+_A9.raw;	1	Inter	6,M(Oxidation[M]);	0.187	EQIGGMSWLFGDKTPTDDANAAVGGQDTTKPK(30)-TQIDKLDKIFTPINLNQSHWALGIIDLK(8):0	HSSTim23_YEAST	PI_YEAST	sp|P10|HSSTim23_YEAST	sp|P1|PI_YEAST	sp|P10|HSSTim23_YEAST(151)-sp|P1|PI_YEAST(105)	1	151	105	12465	0.73	9773;	File: "Z:\alinden\DATA\2017\06_Jun\170619[Ridhima_TOMTIM]w and wo blocking protein\RAW\TOMTIM+\R_Gomkale_Linden_TOMTIM+_A9.raw"; ID: "9773"; scans: "12465"	158.681
yes	DSS	253	1253	1984.11	-0.00013	0	R	Z:\alinden\DATA\2017\06_Jun\170619[Ridhima_TOMTIM]w and wo blocking protein\RAW\TOMTIM+\R_Gomkale_Linden_TOMTIM+_A12.raw;	0	Intra	null	2.8e-11	FHVESKKK(6)-KLDKEGR(1):0	Tim21_YEAST	Tim21_YEAST	sp|P13|Tim21_YEAST	sp|P13|Tim21_YEAST	sp|P13|Tim21_YEAST(179)-sp|P13|Tim21_YEAST(161)	1	179	161	1979	10.55	716;	File: "Z:\alinden\DATA\2017\06_Jun\170619[Ridhima_TOMTIM]w and wo blocking protein\RAW\TOMTIM+\R_Gomkale_Linden_TOMTIM+_A12.raw"; ID: "716"; scans: "1979"	-0.065487
yes	DSS	181	1181	2438.39	0.00232	0	Y	Z:\alinden\DATA\2017\06_Jun\170619[Ridhima_TOMTIM]w and wo blocking protein\RAW\TOMTIM+\R_Gomkale_Linden_TOMTIM+_A12.raw;	0	Intra	null	2.33e-08	FIAHLILTDALK(12)-DFKTLAPR(3):0	PI_YEAST	PI_YEAST	sp|P1|PI_YEAST	sp|P1|PI_YEAST	sp|P1|PI_YEAST(223)-sp|P1|PI_YEAST(43)	3	223	43	17786	7.63	15546;	File: "Z:\alinden\DATA\2017\06_Jun\170619[Ridhima_TOMTIM]w and wo blocking protein\RAW\TOMTIM+\R_Gomkale_Linden_TOMTIM+_A12.raw"; ID: "15546"; scans: "17786"	0.951052
yes	DSS	97	1,97	2438.39	0.00407	0	Y	Z:\alinden\DATA\2017\06_Jun\170619[Ridhima_TOMTIM]w and wo blocking protein\RAW\TOMTIM+\R_Gomkale_Linden_TOMTIM+_A11.raw;	0	Intra	null	1.18e-07	FIAHLILTDALK(12)-DFKTLAPR(3):0	PI_YEAST	PI_YEAST	sp|P1|PI_YEAST	sp|P1|PI_YEAST	sp|P1|PI_YEAST(223)-sp|P1|PI_YEAST(43)	3	223	43	16935	6.93	14819;	File: "Z:\alinden\DATA\2017\06_Jun\170619[Ridhima_TOMTIM]w and wo blocking protein\RAW\TOMTIM+\R_Gomkale_Linden_TOMTIM+_A11.raw"; ID: "14819"; scans: "16935"	1.66844
yes	DSS	98	1,98	2438.39	0.00523	0	Y	Z:\alinden\DATA\2017\06_Jun\170619[Ridhima_TOMTIM]w and wo blocking protein\RAW\TOMTIM+\R_Gomkale_Linden_TOMTIM+_A11.raw;	0	Intra	null	3.79e-07	FIAHLILTDALK(12)-DFKTLAPR(3):0	PI_YEAST	PI_YEAST	sp|P1|PI_YEAST	sp|P1|PI_YEAST	sp|P1|PI_YEAST(223)-sp|P1|PI_YEAST(43)	3	223	43	16945	6.42	14828;	File: "Z:\alinden\DATA\2017\06_Jun\170619[Ridhima_TOMTIM]w and wo blocking protein\RAW\TOMTIM+\R_Gomkale_Linden_TOMTIM+_A11.raw"; ID: "14828"; scans: "16945"	2.14396
yes	DSS	124	1124	2803.53	0.00026	0	R	Z:\alinden\DATA\2017\06_Jun\170619[Ridhima_TOMTIM]w and wo blocking protein\RAW\TOMTIM+\R_Gomkale_Linden_TOMTIM+_A11.raw;	1	Inter	null	0.00481	FKSSLIDEELKNR(2)-KTQIDKLDK(1):0	Mdj2_YEAST	PI_YEAST	sp|P19|Mdj2_YEAST	sp|P1|PI_YEAST	sp|P19|Mdj2_YEAST(58)-sp|P1|PI_YEAST(97)	1	58	97	3526	2.32	2180;	File: "Z:\alinden\DATA\2017\06_Jun\170619[Ridhima_TOMTIM]w and wo blocking protein\RAW\TOMTIM+\R_Gomkale_Linden_TOMTIM+_A11.raw"; ID: "2180"; scans: "3526"	0.092707
yes	DSS	176	1176	2584.33	-0.00179	0	G	Z:\alinden\DATA\2017\06_Jun\170619[Ridhima_TOMTIM]w and wo blocking protein\RAW\TOMTIM+\R_Gomkale_Linden_TOMTIM+_A12.raw;	0	Intra	null	3.01e-06	FTSTFYELFPKTFPK(11)-KEYR(1):0	Jac1_YEAST	Jac1_YEAST	sp|P2|Jac1_YEAST	sp|P2|Jac1_YEAST	sp|P2|Jac1_YEAST(20)-sp|P2|Jac1_YEAST(38)	14	20	38	15621	5.52	13521;	File: "Z:\alinden\DATA\2017\06_Jun\170619[Ridhima_TOMTIM]w and wo blocking protein\RAW\TOMTIM+\R_Gomkale_Linden_TOMTIM+_A12.raw"; ID: "13521"; scans: "15621"	-0.692368
yes	DSS	91	1,91	2584.33	4e-05	0	G	Z:\alinden\DATA\2017\06_Jun\170619[Ridhima_TOMTIM]w and wo blocking protein\RAW\TOMTIM+\R_Gomkale_Linden_TOMTIM+_A11.raw;	0	Intra	null	4.83e-06	FTSTFYELFPKTFPK(11)-KEYR(1):0	Jac1_YEAST	Jac1_YEAST	sp|P2|Jac1_YEAST	sp|P2|Jac1_YEAST	sp|P2|Jac1_YEAST(20)-sp|P2|Jac1_YEAST(38)	14	20	38	14048	5.32	12095;	File: "Z:\alinden\DATA\2017\06_Jun\170619[Ridhima_TOMTIM]w and wo blocking protein\RAW\TOMTIM+\R_Gomkale_Linden_TOMTIM+_A11.raw"; ID: "12095"; scans: "14048"	0.015472
yes	DSS	175	1175	2584.33	0.0013	0	G	Z:\alinden\DATA\2017\06_Jun\170619[Ridhima_TOMTIM]w and wo blocking protein\RAW\TOMTIM+\R_Gomkale_Linden_TOMTIM+_A12.raw;	0	Intra	null	7.79e-06	FTSTFYELFPKTFPK(11)-KEYR(1):0	Jac1_YEAST	Jac1_YEAST	sp|P2|Jac1_YEAST	sp|P2|Jac1_YEAST	sp|P2|Jac1_YEAST(20)-sp|P2|Jac1_YEAST(38)	14	20	38	15488	5.11	13396;	File: "Z:\alinden\DATA\2017\06_Jun\170619[Ridhima_TOMTIM]w and wo blocking protein\RAW\TOMTIM+\R_Gomkale_Linden_TOMTIM+_A12.raw"; ID: "13396"; scans: "15488"	0.502836
yes	DSS	262	1262	2584.33	0.00022	0	G	Z:\alinden\DATA\2017\06_Jun\170619[Ridhima_TOMTIM]w and wo blocking protein\RAW\TOMTIM+\R_Gomkale_Linden_TOMTIM+_A13.raw;	0	Intra	null	1.46e-05	FTSTFYELFPKTFPK(11)-KEYR(1):0	Jac1_YEAST	Jac1_YEAST	sp|P2|Jac1_YEAST	sp|P2|Jac1_YEAST	sp|P2|Jac1_YEAST(20)-sp|P2|Jac1_YEAST(38)	14	20	38	16121	4.84	13826;	File: "Z:\alinden\DATA\2017\06_Jun\170619[Ridhima_TOMTIM]w and wo blocking protein\RAW\TOMTIM+\R_Gomkale_Linden_TOMTIM+_A13.raw"; ID: "13826"; scans: "16121"	0.085095
yes	DSS	174	1174	2584.33	0.0016	0	G	Z:\alinden\DATA\2017\06_Jun\170619[Ridhima_TOMTIM]w and wo blocking protein\RAW\TOMTIM+\R_Gomkale_Linden_TOMTIM+_A12.raw;	0	Intra	null	5.49e-05	FTSTFYELFPKTFPK(11)-KEYR(1):0	Jac1_YEAST	Jac1_YEAST	sp|P2|Jac1_YEAST	sp|P2|Jac1_YEAST	sp|P2|Jac1_YEAST(20)-sp|P2|Jac1_YEAST(38)	14	20	38	15486	4.26	13394;	File: "Z:\alinden\DATA\2017\06_Jun\170619[Ridhima_TOMTIM]w and wo blocking protein\RAW\TOMTIM+\R_Gomkale_Linden_TOMTIM+_A12.raw"; ID: "13394"; scans: "15486"	0.618876
yes	DSS	261	1261	2584.33	0.00208	0	G	Z:\alinden\DATA\2017\06_Jun\170619[Ridhima_TOMTIM]w and wo blocking protein\RAW\TOMTIM+\R_Gomkale_Linden_TOMTIM+_A13.raw;	0	Intra	null	6.7e-05	FTSTFYELFPKTFPK(11)-KEYR(1):0	Jac1_YEAST	Jac1_YEAST	sp|P2|Jac1_YEAST	sp|P2|Jac1_YEAST	sp|P2|Jac1_YEAST(20)-sp|P2|Jac1_YEAST(38)	14	20	38	16015	4.17	13726;	File: "Z:\alinden\DATA\2017\06_Jun\170619[Ridhima_TOMTIM]w and wo blocking protein\RAW\TOMTIM+\R_Gomkale_Linden_TOMTIM+_A13.raw"; ID: "13726"; scans: "16015"	0.804538
yes	DSS	92	1,92	2584.33	0.00166	0	G	Z:\alinden\DATA\2017\06_Jun\170619[Ridhima_TOMTIM]w and wo blocking protein\RAW\TOMTIM+\R_Gomkale_Linden_TOMTIM+_A11.raw;	0	Intra	null	0.00256	FTSTFYELFPKTFPK(11)-KEYR(1):0	Jac1_YEAST	Jac1_YEAST	sp|P2|Jac1_YEAST	sp|P2|Jac1_YEAST	sp|P2|Jac1_YEAST(20)-sp|P2|Jac1_YEAST(38)	14	20	38	14178	2.59	12218;	File: "Z:\alinden\DATA\2017\06_Jun\170619[Ridhima_TOMTIM]w and wo blocking protein\RAW\TOMTIM+\R_Gomkale_Linden_TOMTIM+_A11.raw"; ID: "12218"; scans: "14178"	0.642083
yes	DSS	260	1260	2584.33	-0.00326	0	G	Z:\alinden\DATA\2017\06_Jun\170619[Ridhima_TOMTIM]w and wo blocking protein\RAW\TOMTIM+\R_Gomkale_Linden_TOMTIM+_A13.raw;	0	Intra	null	0.00565	FTSTFYELFPKTFPK(11)-KEYR(1):0	Jac1_YEAST	Jac1_YEAST	sp|P2|Jac1_YEAST	sp|P2|Jac1_YEAST	sp|P2|Jac1_YEAST(20)-sp|P2|Jac1_YEAST(38)	14	20	38	15990	2.25	13704;	File: "Z:\alinden\DATA\2017\06_Jun\170619[Ridhima_TOMTIM]w and wo blocking protein\RAW\TOMTIM+\R_Gomkale_Linden_TOMTIM+_A13.raw"; ID: "13704"; scans: "15990"	-1.26096
yes	DSS	305	1305	2584.33	0.00332	0	G	Z:\alinden\DATA\2017\06_Jun\170619[Ridhima_TOMTIM]w and wo blocking protein\RAW\TOMTIM+\R_Gomkale_Linden_TOMTIM+_A14.raw;	0	Intra	null	0.0246	FTSTFYELFPKTFPK(11)-KEYR(1):0	Jac1_YEAST	Jac1_YEAST	sp|P2|Jac1_YEAST	sp|P2|Jac1_YEAST	sp|P2|Jac1_YEAST(20)-sp|P2|Jac1_YEAST(38)	14	20	38	15126	1.61	12465;	File: "Z:\alinden\DATA\2017\06_Jun\170619[Ridhima_TOMTIM]w and wo blocking protein\RAW\TOMTIM+\R_Gomkale_Linden_TOMTIM+_A14.raw"; ID: "12465"; scans: "15126"	1.28417
yes	DSS	59	1,59	3345.77	-0.01424	0	G	Z:\alinden\DATA\2017\06_Jun\170619[Ridhima_TOMTIM]w and wo blocking protein\RAW\TOMTIM+\R_Gomkale_Linden_TOMTIM+_A10b.raw;	0	Intra	null	1.1e-11	FTSTFYELFPKTFPK(11)-KLPIWTIDQSR(1):0	Jac1_YEAST	Jac1_YEAST	sp|P2|Jac1_YEAST	sp|P2|Jac1_YEAST	sp|P2|Jac1_YEAST(20)-sp|P2|Jac1_YEAST(25)	8	20	25	19547	10.96	17457;	File: "Z:\alinden\DATA\2017\06_Jun\170619[Ridhima_TOMTIM]w and wo blocking protein\RAW\TOMTIM+\R_Gomkale_Linden_TOMTIM+_A10b.raw"; ID: "17457"; scans: "19547"	-4.25486
yes	DSS	107	1107	3345.77	0.00776	0	G	Z:\alinden\DATA\2017\06_Jun\170619[Ridhima_TOMTIM]w and wo blocking protein\RAW\TOMTIM+\R_Gomkale_Linden_TOMTIM+_A11.raw;	0	Intra	null	1.48e-10	FTSTFYELFPKTFPK(11)-KLPIWTIDQSR(1):0	Jac1_YEAST	Jac1_YEAST	sp|P2|Jac1_YEAST	sp|P2|Jac1_YEAST	sp|P2|Jac1_YEAST(20)-sp|P2|Jac1_YEAST(25)	8	20	25	20715	9.83	18385;	File: "Z:\alinden\DATA\2017\06_Jun\170619[Ridhima_TOMTIM]w and wo blocking protein\RAW\TOMTIM+\R_Gomkale_Linden_TOMTIM+_A11.raw"; ID: "18385"; scans: "20715"	2.31864
yes	DSS	12	1,12	3345.77	-0.00984	0	G	Z:\alinden\DATA\2017\06_Jun\170619[Ridhima_TOMTIM]w and wo blocking protein\RAW\TOMTIM+\R_Gomkale_Linden_TOMTIM+_A10.raw;	0	Intra	null	4.34e-10	FTSTFYELFPKTFPK(11)-KLPIWTIDQSR(1):0	Jac1_YEAST	Jac1_YEAST	sp|P2|Jac1_YEAST	sp|P2|Jac1_YEAST	sp|P2|Jac1_YEAST(20)-sp|P2|Jac1_YEAST(25)	8	20	25	19026	9.36	16655;	File: "Z:\alinden\DATA\2017\06_Jun\170619[Ridhima_TOMTIM]w and wo blocking protein\RAW\TOMTIM+\R_Gomkale_Linden_TOMTIM+_A10.raw"; ID: "16655"; scans: "19026"	-2.94015
yes	DSS	105	1105	3345.77	1.01212	0	G	Z:\alinden\DATA\2017\06_Jun\170619[Ridhima_TOMTIM]w and wo blocking protein\RAW\TOMTIM+\R_Gomkale_Linden_TOMTIM+_A11.raw;	0	Intra	null	4.44e-09	FTSTFYELFPKTFPK(11)-KLPIWTIDQSR(1):0	Jac1_YEAST	Jac1_YEAST	sp|P2|Jac1_YEAST	sp|P2|Jac1_YEAST	sp|P2|Jac1_YEAST(20)-sp|P2|Jac1_YEAST(25)	8	20	25	20592	8.35	18270;	File: "Z:\alinden\DATA\2017\06_Jun\170619[Ridhima_TOMTIM]w and wo blocking protein\RAW\TOMTIM+\R_Gomkale_Linden_TOMTIM+_A11.raw"; ID: "18270"; scans: "20592"	302.325
yes	DSS	189	1189	3345.77	-0.00176	0	G	Z:\alinden\DATA\2017\06_Jun\170619[Ridhima_TOMTIM]w and wo blocking protein\RAW\TOMTIM+\R_Gomkale_Linden_TOMTIM+_A12.raw;	0	Intra	null	5.88e-08	FTSTFYELFPKTFPK(11)-KLPIWTIDQSR(1):0	Jac1_YEAST	Jac1_YEAST	sp|P2|Jac1_YEAST	sp|P2|Jac1_YEAST	sp|P2|Jac1_YEAST(20)-sp|P2|Jac1_YEAST(25)	8	20	25	21460	7.23	19001;	File: "Z:\alinden\DATA\2017\06_Jun\170619[Ridhima_TOMTIM]w and wo blocking protein\RAW\TOMTIM+\R_Gomkale_Linden_TOMTIM+_A12.raw"; ID: "19001"; scans: "21460"	-0.525879
yes	DSS	106	1106	3345.77	-0.01463	0	R	Z:\alinden\DATA\2017\06_Jun\170619[Ridhima_TOMTIM]w and wo blocking protein\RAW\TOMTIM+\R_Gomkale_Linden_TOMTIM+_A11.raw;	0	Intra	null	1.79e-07	FTSTFYELFPKTFPK(11)-KLPIWTIDQSR(1):0	Jac1_YEAST	Jac1_YEAST	sp|P2|Jac1_YEAST	sp|P2|Jac1_YEAST	sp|P2|Jac1_YEAST(20)-sp|P2|Jac1_YEAST(25)	8	20	25	20651	6.75	18325;	File: "Z:\alinden\DATA\2017\06_Jun\170619[Ridhima_TOMTIM]w and wo blocking protein\RAW\TOMTIM+\R_Gomkale_Linden_TOMTIM+_A11.raw"; ID: "18325"; scans: "20651"	-4.37139
yes	DSS	190	1190	3345.77	0.00336	0	G	Z:\alinden\DATA\2017\06_Jun\170619[Ridhima_TOMTIM]w and wo blocking protein\RAW\TOMTIM+\R_Gomkale_Linden_TOMTIM+_A12.raw;	0	Intra	null	9.93e-06	FTSTFYELFPKTFPK(11)-KLPIWTIDQSR(1):0	Jac1_YEAST	Jac1_YEAST	sp|P2|Jac1_YEAST	sp|P2|Jac1_YEAST	sp|P2|Jac1_YEAST(20)-sp|P2|Jac1_YEAST(25)	8	20	25	21607	5	19140;	File: "Z:\alinden\DATA\2017\06_Jun\170619[Ridhima_TOMTIM]w and wo blocking protein\RAW\TOMTIM+\R_Gomkale_Linden_TOMTIM+_A12.raw"; ID: "19140"; scans: "21607"	1.00395
yes	DSS	115	1115	3345.77	1.01149	0	Y	Z:\alinden\DATA\2017\06_Jun\170619[Ridhima_TOMTIM]w and wo blocking protein\RAW\TOMTIM+\R_Gomkale_Linden_TOMTIM+_A11.raw;	0	Intra	null	6.58e-05	FTSTFYELFPKTFPK(11)-KLPIWTIDQSR(1):0	Jac1_YEAST	Jac1_YEAST	sp|P2|Jac1_YEAST	sp|P2|Jac1_YEAST	sp|P2|Jac1_YEAST(20)-sp|P2|Jac1_YEAST(25)	8	20	25	22698	4.18	20253;	File: "Z:\alinden\DATA\2017\06_Jun\170619[Ridhima_TOMTIM]w and wo blocking protein\RAW\TOMTIM+\R_Gomkale_Linden_TOMTIM+_A11.raw"; ID: "20253"; scans: "22698"	302.137
yes	DSS	171	1171	2853.51	0.00171	0	G	Z:\alinden\DATA\2017\06_Jun\170619[Ridhima_TOMTIM]w and wo blocking protein\RAW\TOMTIM+\R_Gomkale_Linden_TOMTIM+_A12.raw;	0	Intra	null	1.04e-06	FTSTFYELFPKTFPK(11)-LRKEYR(3):0	Jac1_YEAST	Jac1_YEAST	sp|P2|Jac1_YEAST	sp|P2|Jac1_YEAST	sp|P2|Jac1_YEAST(20)-sp|P2|Jac1_YEAST(38)	14	20	38	14495	5.98	12462;	File: "Z:\alinden\DATA\2017\06_Jun\170619[Ridhima_TOMTIM]w and wo blocking protein\RAW\TOMTIM+\R_Gomkale_Linden_TOMTIM+_A12.raw"; ID: "12462"; scans: "14495"	0.59905
yes	DSS	89	1,89	2853.51	-0.00125	0	G	Z:\alinden\DATA\2017\06_Jun\170619[Ridhima_TOMTIM]w and wo blocking protein\RAW\TOMTIM+\R_Gomkale_Linden_TOMTIM+_A11.raw;	0	Intra	null	4.71e-06	FTSTFYELFPKTFPK(11)-LRKEYR(3):0	Jac1_YEAST	Jac1_YEAST	sp|P2|Jac1_YEAST	sp|P2|Jac1_YEAST	sp|P2|Jac1_YEAST(20)-sp|P2|Jac1_YEAST(38)	14	20	38	13195	5.33	11291;	File: "Z:\alinden\DATA\2017\06_Jun\170619[Ridhima_TOMTIM]w and wo blocking protein\RAW\TOMTIM+\R_Gomkale_Linden_TOMTIM+_A11.raw"; ID: "11291"; scans: "13195"	-0.437903
yes	DSS	172	1172	2853.51	0.00808	0	G	Z:\alinden\DATA\2017\06_Jun\170619[Ridhima_TOMTIM]w and wo blocking protein\RAW\TOMTIM+\R_Gomkale_Linden_TOMTIM+_A12.raw;	0	Intra	null	8.57e-06	FTSTFYELFPKTFPK(11)-LRKEYR(3):0	Jac1_YEAST	Jac1_YEAST	sp|P2|Jac1_YEAST	sp|P2|Jac1_YEAST	sp|P2|Jac1_YEAST(20)-sp|P2|Jac1_YEAST(38)	14	20	38	14513	5.07	12479;	File: "Z:\alinden\DATA\2017\06_Jun\170619[Ridhima_TOMTIM]w and wo blocking protein\RAW\TOMTIM+\R_Gomkale_Linden_TOMTIM+_A12.raw"; ID: "12479"; scans: "14513"	2.83059
yes	DSS	90	1,90	2853.51	0.00099	0	Y	Z:\alinden\DATA\2017\06_Jun\170619[Ridhima_TOMTIM]w and wo blocking protein\RAW\TOMTIM+\R_Gomkale_Linden_TOMTIM+_A11.raw;	0	Intra	null	0.000833	FTSTFYELFPKTFPK(11)-LRKEYR(3):0	Jac1_YEAST	Jac1_YEAST	sp|P2|Jac1_YEAST	sp|P2|Jac1_YEAST	sp|P2|Jac1_YEAST(20)-sp|P2|Jac1_YEAST(38)	14	20	38	13224	3.08	11318;	File: "Z:\alinden\DATA\2017\06_Jun\170619[Ridhima_TOMTIM]w and wo blocking protein\RAW\TOMTIM+\R_Gomkale_Linden_TOMTIM+_A11.raw"; ID: "11318"; scans: "13224"	0.346819
yes	DSS	173	1173	2853.51	0.99879	0	G	Z:\alinden\DATA\2017\06_Jun\170619[Ridhima_TOMTIM]w and wo blocking protein\RAW\TOMTIM+\R_Gomkale_Linden_TOMTIM+_A12.raw;	0	Intra	null	0.0889	FTSTFYELFPKTFPK(11)-LRKEYR(3):0	Jac1_YEAST	Jac1_YEAST	sp|P2|Jac1_YEAST	sp|P2|Jac1_YEAST	sp|P2|Jac1_YEAST(20)-sp|P2|Jac1_YEAST(38)	14	20	38	14547	1.05	12511;	File: "Z:\alinden\DATA\2017\06_Jun\170619[Ridhima_TOMTIM]w and wo blocking protein\RAW\TOMTIM+\R_Gomkale_Linden_TOMTIM+_A12.raw"; ID: "12511"; scans: "14547"	349.776
yes	DSS	245	1245	2118.2	0.00065	0	R	Z:\alinden\DATA\2017\06_Jun\170619[Ridhima_TOMTIM]w and wo blocking protein\RAW\TOMTIM+\R_Gomkale_Linden_TOMTIM+_A12.raw;	0	Intra	null	2.67e-05	GSTIVGKTLK(7)-EAYLKAQR(5):0	Tim44_YEAST	Tim44_YEAST	sp|P14|Tim44_YEAST	sp|P14|Tim44_YEAST	sp|P14|Tim44_YEAST(107)-sp|P14|Tim44_YEAST(97)	3	107	97	6885	4.57	5321;	File: "Z:\alinden\DATA\2017\06_Jun\170619[Ridhima_TOMTIM]w and wo blocking protein\RAW\TOMTIM+\R_Gomkale_Linden_TOMTIM+_A12.raw"; ID: "5321"; scans: "6885"	0.306718
yes	DSS	229	1229	2246.3	-0.00196	0	G	Z:\alinden\DATA\2017\06_Jun\170619[Ridhima_TOMTIM]w and wo blocking protein\RAW\TOMTIM+\R_Gomkale_Linden_TOMTIM+_A12.raw;	0	Intra	null	2.68e-09	GSTIVGKTLKK(7)-EAYLKAQR(5):0	Tim44_YEAST	Tim44_YEAST	sp|P14|Tim44_YEAST	sp|P14|Tim44_YEAST	sp|P14|Tim44_YEAST(107)-sp|P14|Tim44_YEAST(97)	3	107	97	5310	8.57	3841;	File: "Z:\alinden\DATA\2017\06_Jun\170619[Ridhima_TOMTIM]w and wo blocking protein\RAW\TOMTIM+\R_Gomkale_Linden_TOMTIM+_A12.raw"; ID: "3841"; scans: "5310"	-0.872156
yes	DSS	290	1290	2246.3	-0.00121	0	R	Z:\alinden\DATA\2017\06_Jun\170619[Ridhima_TOMTIM]w and wo blocking protein\RAW\TOMTIM+\R_Gomkale_Linden_TOMTIM+_A13.raw;	0	Intra	null	4.69e-07	GSTIVGKTLKK(7)-EAYLKAQR(5):0	Tim44_YEAST	Tim44_YEAST	sp|P14|Tim44_YEAST	sp|P14|Tim44_YEAST	sp|P14|Tim44_YEAST(107)-sp|P14|Tim44_YEAST(97)	3	107	97	5516	6.33	4032;	File: "Z:\alinden\DATA\2017\06_Jun\170619[Ridhima_TOMTIM]w and wo blocking protein\RAW\TOMTIM+\R_Gomkale_Linden_TOMTIM+_A13.raw"; ID: "4032"; scans: "5516"	-0.538423
yes	DSS	138	1138	2910.41	0.00568	0	Y	Z:\alinden\DATA\2017\06_Jun\170619[Ridhima_TOMTIM]w and wo blocking protein\RAW\TOMTIM+\R_Gomkale_Linden_TOMTIM+_A11.raw;	0	Intra	null	0.000345	GVVGSKAESDAVAEANDIDD(6)-THAKEVK(4):0	Tom20_YEAST	Tom20_YEAST	sp|P5|Tom20_YEAST	sp|P5|Tom20_YEAST	sp|P5|Tom20_YEAST(169)-sp|P5|Tom20_YEAST(62)	2	169	62	4993	3.46	3564;	File: "Z:\alinden\DATA\2017\06_Jun\170619[Ridhima_TOMTIM]w and wo blocking protein\RAW\TOMTIM+\R_Gomkale_Linden_TOMTIM+_A11.raw"; ID: "3564"; scans: "4993"	1.95094
yes	DSS	233	1233	2910.41	0.01126	0	R	Z:\alinden\DATA\2017\06_Jun\170619[Ridhima_TOMTIM]w and wo blocking protein\RAW\TOMTIM+\R_Gomkale_Linden_TOMTIM+_A12.raw;	0	Intra	null	0.00281	GVVGSKAESDAVAEANDIDD(6)-THAKEVK(4):0	Tom20_YEAST	Tom20_YEAST	sp|P5|Tom20_YEAST	sp|P5|Tom20_YEAST	sp|P5|Tom20_YEAST(169)-sp|P5|Tom20_YEAST(62)	2	169	62	5488	2.55	4008;	File: "Z:\alinden\DATA\2017\06_Jun\170619[Ridhima_TOMTIM]w and wo blocking protein\RAW\TOMTIM+\R_Gomkale_Linden_TOMTIM+_A12.raw"; ID: "4008"; scans: "5488"	3.86752
yes	DSS	341	1341	7786.81	4.06618	0	Y	Z:\alinden\DATA\2017\06_Jun\170619[Ridhima_TOMTIM]w and wo blocking protein\RAW\TOMTIM+\R_Gomkale_Linden_TOMTIM+_A8b.raw;	0	Intra	null	0.00204	HNVEDGSVQLADHYQQNTPIGDGPVLLPDNHYLSTQSVLSKDPNEK(41)-DHMVLKEFVTAAGITLGMDELYK(6):0	Jac1_YEAST	Jac1_YEAST	sp|P2|Jac1_YEAST	sp|P2|Jac1_YEAST	sp|P2|Jac1_YEAST(394)-sp|P2|Jac1_YEAST(406)	1	394	406	9658	2.69	5660;	File: "Z:\alinden\DATA\2017\06_Jun\170619[Ridhima_TOMTIM]w and wo blocking protein\RAW\TOMTIM+\R_Gomkale_Linden_TOMTIM+_A8b.raw"; ID: "5660"; scans: "9658"	521.848
yes	DSS	433	1433	6777.12	3.99372	0	G	Z:\alinden\DATA\2017\06_Jun\170619[Ridhima_TOMTIM]w and wo blocking protein\RAW\TOMTIM+\R_Gomkale_Linden_TOMTIM+_A9b.raw;	0	Intra	14,C(Carbamidomethyl[C]);23,C(Carbamidomethyl[C]);28,C(Carbamidomethyl[C]);	0.000239	HTIGEDFDLIHLDCPQQPNGYDCGIYVCMNTLYGSADAPLDFDYKDAIR(45)-DFKTLAPR(3):0	PI_YEAST	PI_YEAST	sp|P1|PI_YEAST	sp|P1|PI_YEAST	sp|P1|PI_YEAST(204)-sp|P1|PI_YEAST(43)	1	204	43	15630	3.62	12532;	File: "Z:\alinden\DATA\2017\06_Jun\170619[Ridhima_TOMTIM]w and wo blocking protein\RAW\TOMTIM+\R_Gomkale_Linden_TOMTIM+_A9b.raw"; ID: "12532"; scans: "15630"	588.86
yes	DSS	429	1429	7961.63	3.992	0	G	Z:\alinden\DATA\2017\06_Jun\170619[Ridhima_TOMTIM]w and wo blocking protein\RAW\TOMTIM+\R_Gomkale_Linden_TOMTIM+_A9b.raw;	0	Intra	14,C(Carbamidomethyl[C]);23,C(Carbamidomethyl[C]);28,C(Carbamidomethyl[C]);29,M(Oxidation[M]);	1.39e-16	HTIGEDFDLIHLDCPQQPNGYDCGIYVCMNTLYGSADAPLDFDYKDAIR(45)-TSGTLVPELNEKDDDQVQK(1):0	PI_YEAST	PI_YEAST	sp|P1|PI_YEAST	sp|P1|PI_YEAST	sp|P1|PI_YEAST(204)-sp|P1|PI_YEAST(1)	44	204	1	14625	15.86	11588;	File: "Z:\alinden\DATA\2017\06_Jun\170619[Ridhima_TOMTIM]w and wo blocking protein\RAW\TOMTIM+\R_Gomkale_Linden_TOMTIM+_A9b.raw"; ID: "11588"; scans: "14625"	501.09
yes	DSS	344	1344	7961.63	3.97952	0	G	Z:\alinden\DATA\2017\06_Jun\170619[Ridhima_TOMTIM]w and wo blocking protein\RAW\TOMTIM+\R_Gomkale_Linden_TOMTIM+_A8b.raw;	0	Intra	14,C(Carbamidomethyl[C]);23,C(Carbamidomethyl[C]);28,C(Carbamidomethyl[C]);29,M(Oxidation[M]);	2.74e-16	HTIGEDFDLIHLDCPQQPNGYDCGIYVCMNTLYGSADAPLDFDYKDAIR(45)-TSGTLVPELNEKDDDQVQK(1):0	PI_YEAST	PI_YEAST	sp|P1|PI_YEAST	sp|P1|PI_YEAST	sp|P1|PI_YEAST(204)-sp|P1|PI_YEAST(1)	44	204	1	10513	15.56	6451;	File: "Z:\alinden\DATA\2017\06_Jun\170619[Ridhima_TOMTIM]w and wo blocking protein\RAW\TOMTIM+\R_Gomkale_Linden_TOMTIM+_A8b.raw"; ID: "6451"; scans: "10513"	499.525
yes	DSS	345	1345	7961.63	1.991	0	G	Z:\alinden\DATA\2017\06_Jun\170619[Ridhima_TOMTIM]w and wo blocking protein\RAW\TOMTIM+\R_Gomkale_Linden_TOMTIM+_A8b.raw;	0	Intra	14,C(Carbamidomethyl[C]);23,C(Carbamidomethyl[C]);28,C(Carbamidomethyl[C]);29,M(Oxidation[M]);	6.2e-14	HTIGEDFDLIHLDCPQQPNGYDCGIYVCMNTLYGSADAPLDFDYKDAIR(45)-TSGTLVPELNEKDDDQVQK(1):0	PI_YEAST	PI_YEAST	sp|P1|PI_YEAST	sp|P1|PI_YEAST	sp|P1|PI_YEAST(204)-sp|P1|PI_YEAST(1)	44	204	1	10523	13.21	6460;	File: "Z:\alinden\DATA\2017\06_Jun\170619[Ridhima_TOMTIM]w and wo blocking protein\RAW\TOMTIM+\R_Gomkale_Linden_TOMTIM+_A8b.raw"; ID: "6460"; scans: "10523"	249.98
yes	DSS	322	1322	7945.63	3.00715	0	G	Z:\alinden\DATA\2017\06_Jun\170619[Ridhima_TOMTIM]w and wo blocking protein\RAW\TOMTIM+\R_Gomkale_Linden_TOMTIM+_A8.raw;	0	Intra	14,C(Carbamidomethyl[C]);23,C(Carbamidomethyl[C]);28,C(Carbamidomethyl[C]);	1.12e-13	HTIGEDFDLIHLDCPQQPNGYDCGIYVCMNTLYGSADAPLDFDYKDAIR(45)-TSGTLVPELNEKDDDQVQK(1):0	PI_YEAST	PI_YEAST	sp|P1|PI_YEAST	sp|P1|PI_YEAST	sp|P1|PI_YEAST(204)-sp|P1|PI_YEAST(1)	44	204	1	9188	12.95	5237;	File: "Z:\alinden\DATA\2017\06_Jun\170619[Ridhima_TOMTIM]w and wo blocking protein\RAW\TOMTIM+\R_Gomkale_Linden_TOMTIM+_A8.raw"; ID: "5237"; scans: "9188"	378.275
yes	DSS	369	1369	7961.63	4.01324	0	G	Z:\alinden\DATA\2017\06_Jun\170619[Ridhima_TOMTIM]w and wo blocking protein\RAW\TOMTIM+\R_Gomkale_Linden_TOMTIM+_A9.raw;	0	Intra	14,C(Carbamidomethyl[C]);23,C(Carbamidomethyl[C]);28,C(Carbamidomethyl[C]);29,M(Oxidation[M]);	1.34e-13	HTIGEDFDLIHLDCPQQPNGYDCGIYVCMNTLYGSADAPLDFDYKDAIR(45)-TSGTLVPELNEKDDDQVQK(1):0	PI_YEAST	PI_YEAST	sp|P1|PI_YEAST	sp|P1|PI_YEAST	sp|P1|PI_YEAST(204)-sp|P1|PI_YEAST(1)	44	204	1	15292	12.87	12426;	File: "Z:\alinden\DATA\2017\06_Jun\170619[Ridhima_TOMTIM]w and wo blocking protein\RAW\TOMTIM+\R_Gomkale_Linden_TOMTIM+_A9.raw"; ID: "12426"; scans: "15292"	503.755
yes	DSS	418	1418	7945.63	3.00715	0	G	Z:\alinden\DATA\2017\06_Jun\170619[Ridhima_TOMTIM]w and wo blocking protein\RAW\TOMTIM+\R_Gomkale_Linden_TOMTIM+_A9b.raw;	0	Intra	14,C(Carbamidomethyl[C]);23,C(Carbamidomethyl[C]);28,C(Carbamidomethyl[C]);	6.78e-12	HTIGEDFDLIHLDCPQQPNGYDCGIYVCMNTLYGSADAPLDFDYKDAIR(45)-TSGTLVPELNEKDDDQVQK(1):0	PI_YEAST	PI_YEAST	sp|P1|PI_YEAST	sp|P1|PI_YEAST	sp|P1|PI_YEAST(204)-sp|P1|PI_YEAST(1)	44	204	1	13272	11.17	10319;	File: "Z:\alinden\DATA\2017\06_Jun\170619[Ridhima_TOMTIM]w and wo blocking protein\RAW\TOMTIM+\R_Gomkale_Linden_TOMTIM+_A9b.raw"; ID: "10319"; scans: "13272"	378.275
yes	DSS	362	1362	7945.63	-0.02579	0	G	Z:\alinden\DATA\2017\06_Jun\170619[Ridhima_TOMTIM]w and wo blocking protein\RAW\TOMTIM+\R_Gomkale_Linden_TOMTIM+_A9.raw;	0	Intra	14,C(Carbamidomethyl[C]);23,C(Carbamidomethyl[C]);28,C(Carbamidomethyl[C]);	7.24e-12	HTIGEDFDLIHLDCPQQPNGYDCGIYVCMNTLYGSADAPLDFDYKDAIR(45)-TSGTLVPELNEKDDDQVQK(1):0	PI_YEAST	PI_YEAST	sp|P1|PI_YEAST	sp|P1|PI_YEAST	sp|P1|PI_YEAST(204)-sp|P1|PI_YEAST(1)	44	204	1	14068	11.14	11277;	File: "Z:\alinden\DATA\2017\06_Jun\170619[Ridhima_TOMTIM]w and wo blocking protein\RAW\TOMTIM+\R_Gomkale_Linden_TOMTIM+_A9.raw"; ID: "11277"; scans: "14068"	-3.24541
yes	DSS	372	1372	7945.63	4.03915	0	G	Z:\alinden\DATA\2017\06_Jun\170619[Ridhima_TOMTIM]w and wo blocking protein\RAW\TOMTIM+\R_Gomkale_Linden_TOMTIM+_A9.raw;	0	Intra	14,C(Carbamidomethyl[C]);23,C(Carbamidomethyl[C]);28,C(Carbamidomethyl[C]);	1.12e-11	HTIGEDFDLIHLDCPQQPNGYDCGIYVCMNTLYGSADAPLDFDYKDAIR(45)-TSGTLVPELNEKDDDQVQK(1):0	PI_YEAST	PI_YEAST	sp|P1|PI_YEAST	sp|P1|PI_YEAST	sp|P1|PI_YEAST(204)-sp|P1|PI_YEAST(1)	44	204	1	16134	10.95	13216;	File: "Z:\alinden\DATA\2017\06_Jun\170619[Ridhima_TOMTIM]w and wo blocking protein\RAW\TOMTIM+\R_Gomkale_Linden_TOMTIM+_A9.raw"; ID: "13216"; scans: "16134"	508.026
yes	DSS	430	1430	7945.63	4.00765	0	G	Z:\alinden\DATA\2017\06_Jun\170619[Ridhima_TOMTIM]w and wo blocking protein\RAW\TOMTIM+\R_Gomkale_Linden_TOMTIM+_A9b.raw;	0	Intra	14,C(Carbamidomethyl[C]);23,C(Carbamidomethyl[C]);28,C(Carbamidomethyl[C]);	1.21e-11	HTIGEDFDLIHLDCPQQPNGYDCGIYVCMNTLYGSADAPLDFDYKDAIR(45)-TSGTLVPELNEKDDDQVQK(1):0	PI_YEAST	PI_YEAST	sp|P1|PI_YEAST	sp|P1|PI_YEAST	sp|P1|PI_YEAST(204)-sp|P1|PI_YEAST(1)	44	204	1	14642	10.92	11604;	File: "Z:\alinden\DATA\2017\06_Jun\170619[Ridhima_TOMTIM]w and wo blocking protein\RAW\TOMTIM+\R_Gomkale_Linden_TOMTIM+_A9b.raw"; ID: "11604"; scans: "14642"	504.066
yes	DSS	359	1359	7945.63	2.98735	0	G	Z:\alinden\DATA\2017\06_Jun\170619[Ridhima_TOMTIM]w and wo blocking protein\RAW\TOMTIM+\R_Gomkale_Linden_TOMTIM+_A9.raw;	0	Intra	14,C(Carbamidomethyl[C]);23,C(Carbamidomethyl[C]);28,C(Carbamidomethyl[C]);	1.23e-11	HTIGEDFDLIHLDCPQQPNGYDCGIYVCMNTLYGSADAPLDFDYKDAIR(45)-TSGTLVPELNEKDDDQVQK(1):0	PI_YEAST	PI_YEAST	sp|P1|PI_YEAST	sp|P1|PI_YEAST	sp|P1|PI_YEAST(204)-sp|P1|PI_YEAST(1)	44	204	1	13947	10.91	11164;	File: "Z:\alinden\DATA\2017\06_Jun\170619[Ridhima_TOMTIM]w and wo blocking protein\RAW\TOMTIM+\R_Gomkale_Linden_TOMTIM+_A9.raw"; ID: "11164"; scans: "13947"	375.785
yes	DSS	323	1323	7945.63	0.99589	0	G	Z:\alinden\DATA\2017\06_Jun\170619[Ridhima_TOMTIM]w and wo blocking protein\RAW\TOMTIM+\R_Gomkale_Linden_TOMTIM+_A8.raw;	0	Intra	14,C(Carbamidomethyl[C]);23,C(Carbamidomethyl[C]);28,C(Carbamidomethyl[C]);	1.58e-11	HTIGEDFDLIHLDCPQQPNGYDCGIYVCMNTLYGSADAPLDFDYKDAIR(45)-TSGTLVPELNEKDDDQVQK(1):0	PI_YEAST	PI_YEAST	sp|P1|PI_YEAST	sp|P1|PI_YEAST	sp|P1|PI_YEAST(204)-sp|P1|PI_YEAST(1)	44	204	1	9202	10.8	5250;	File: "Z:\alinden\DATA\2017\06_Jun\170619[Ridhima_TOMTIM]w and wo blocking protein\RAW\TOMTIM+\R_Gomkale_Linden_TOMTIM+_A8.raw"; ID: "5250"; scans: "9202"	125.306
yes	DSS	415	1415	7945.63	1.0045	0	G	Z:\alinden\DATA\2017\06_Jun\170619[Ridhima_TOMTIM]w and wo blocking protein\RAW\TOMTIM+\R_Gomkale_Linden_TOMTIM+_A9b.raw;	0	Intra	14,C(Carbamidomethyl[C]);23,C(Carbamidomethyl[C]);28,C(Carbamidomethyl[C]);	1.69e-11	HTIGEDFDLIHLDCPQQPNGYDCGIYVCMNTLYGSADAPLDFDYKDAIR(45)-TSGTLVPELNEKDDDQVQK(1):0	PI_YEAST	PI_YEAST	sp|P1|PI_YEAST	sp|P1|PI_YEAST	sp|P1|PI_YEAST(204)-sp|P1|PI_YEAST(1)	44	204	1	13184	10.77	10236;	File: "Z:\alinden\DATA\2017\06_Jun\170619[Ridhima_TOMTIM]w and wo blocking protein\RAW\TOMTIM+\R_Gomkale_Linden_TOMTIM+_A9b.raw"; ID: "10236"; scans: "13184"	126.39
yes	DSS	414	1414	7945.63	-0.00089	0	G	Z:\alinden\DATA\2017\06_Jun\170619[Ridhima_TOMTIM]w and wo blocking protein\RAW\TOMTIM+\R_Gomkale_Linden_TOMTIM+_A9b.raw;	0	Intra	14,C(Carbamidomethyl[C]);23,C(Carbamidomethyl[C]);28,C(Carbamidomethyl[C]);	1.81e-11	HTIGEDFDLIHLDCPQQPNGYDCGIYVCMNTLYGSADAPLDFDYKDAIR(45)-TSGTLVPELNEKDDDQVQK(1):0	PI_YEAST	PI_YEAST	sp|P1|PI_YEAST	sp|P1|PI_YEAST	sp|P1|PI_YEAST(204)-sp|P1|PI_YEAST(1)	44	204	1	13135	10.74	10190;	File: "Z:\alinden\DATA\2017\06_Jun\170619[Ridhima_TOMTIM]w and wo blocking protein\RAW\TOMTIM+\R_Gomkale_Linden_TOMTIM+_A9b.raw"; ID: "10190"; scans: "13135"	-0.111997
yes	DSS	365	1365	7945.63	4.01497	0	G	Z:\alinden\DATA\2017\06_Jun\170619[Ridhima_TOMTIM]w and wo blocking protein\RAW\TOMTIM+\R_Gomkale_Linden_TOMTIM+_A9.raw;	0	Intra	14,C(Carbamidomethyl[C]);23,C(Carbamidomethyl[C]);28,C(Carbamidomethyl[C]);	4.1e-11	HTIGEDFDLIHLDCPQQPNGYDCGIYVCMNTLYGSADAPLDFDYKDAIR(45)-TSGTLVPELNEKDDDQVQK(1):0	PI_YEAST	PI_YEAST	sp|P1|PI_YEAST	sp|P1|PI_YEAST	sp|P1|PI_YEAST(204)-sp|P1|PI_YEAST(1)	44	204	1	15056	10.39	12204;	File: "Z:\alinden\DATA\2017\06_Jun\170619[Ridhima_TOMTIM]w and wo blocking protein\RAW\TOMTIM+\R_Gomkale_Linden_TOMTIM+_A9.raw"; ID: "12204"; scans: "15056"	504.986
yes	DSS	53	1,53	7945.63	2.95075	0	G	Z:\alinden\DATA\2017\06_Jun\170619[Ridhima_TOMTIM]w and wo blocking protein\RAW\TOMTIM+\R_Gomkale_Linden_TOMTIM+_A10b.raw;	0	Intra	14,C(Carbamidomethyl[C]);23,C(Carbamidomethyl[C]);28,C(Carbamidomethyl[C]);	9.86e-11	HTIGEDFDLIHLDCPQQPNGYDCGIYVCMNTLYGSADAPLDFDYKDAIR(45)-TSGTLVPELNEKDDDQVQK(1):0	PI_YEAST	PI_YEAST	sp|P1|PI_YEAST	sp|P1|PI_YEAST	sp|P1|PI_YEAST(204)-sp|P1|PI_YEAST(1)	44	204	1	16873	10.01	14936;	File: "Z:\alinden\DATA\2017\06_Jun\170619[Ridhima_TOMTIM]w and wo blocking protein\RAW\TOMTIM+\R_Gomkale_Linden_TOMTIM+_A10b.raw"; ID: "14936"; scans: "16873"	371.183
yes	DSS	370	1370	7945.63	3.98419	0	G	Z:\alinden\DATA\2017\06_Jun\170619[Ridhima_TOMTIM]w and wo blocking protein\RAW\TOMTIM+\R_Gomkale_Linden_TOMTIM+_A9.raw;	0	Intra	14,C(Carbamidomethyl[C]);23,C(Carbamidomethyl[C]);28,C(Carbamidomethyl[C]);	1.6e-10	HTIGEDFDLIHLDCPQQPNGYDCGIYVCMNTLYGSADAPLDFDYKDAIR(45)-TSGTLVPELNEKDDDQVQK(1):0	PI_YEAST	PI_YEAST	sp|P1|PI_YEAST	sp|P1|PI_YEAST	sp|P1|PI_YEAST(204)-sp|P1|PI_YEAST(1)	44	204	1	15345	9.8	12475;	File: "Z:\alinden\DATA\2017\06_Jun\170619[Ridhima_TOMTIM]w and wo blocking protein\RAW\TOMTIM+\R_Gomkale_Linden_TOMTIM+_A9.raw"; ID: "12475"; scans: "15345"	501.117
yes	DSS	334	1334	7945.63	0.05329	0	G	Z:\alinden\DATA\2017\06_Jun\170619[Ridhima_TOMTIM]w and wo blocking protein\RAW\TOMTIM+\R_Gomkale_Linden_TOMTIM+_A8b.raw;	0	Intra	14,C(Carbamidomethyl[C]);23,C(Carbamidomethyl[C]);28,C(Carbamidomethyl[C]);	4.54e-10	HTIGEDFDLIHLDCPQQPNGYDCGIYVCMNTLYGSADAPLDFDYKDAIR(45)-TSGTLVPELNEKDDDQVQK(1):0	PI_YEAST	PI_YEAST	sp|P1|PI_YEAST	sp|P1|PI_YEAST	sp|P1|PI_YEAST(204)-sp|P1|PI_YEAST(1)	44	204	1	9337	9.34	5364;	File: "Z:\alinden\DATA\2017\06_Jun\170619[Ridhima_TOMTIM]w and wo blocking protein\RAW\TOMTIM+\R_Gomkale_Linden_TOMTIM+_A8b.raw"; ID: "5364"; scans: "9337"	6.70593
yes	DSS	321	1321	7945.63	4.07503	0	G	Z:\alinden\DATA\2017\06_Jun\170619[Ridhima_TOMTIM]w and wo blocking protein\RAW\TOMTIM+\R_Gomkale_Linden_TOMTIM+_A8.raw;	0	Intra	14,C(Carbamidomethyl[C]);23,C(Carbamidomethyl[C]);28,C(Carbamidomethyl[C]);	5.89e-10	HTIGEDFDLIHLDCPQQPNGYDCGIYVCMNTLYGSADAPLDFDYKDAIR(45)-TSGTLVPELNEKDDDQVQK(1):0	PI_YEAST	PI_YEAST	sp|P1|PI_YEAST	sp|P1|PI_YEAST	sp|P1|PI_YEAST(204)-sp|P1|PI_YEAST(1)	44	204	1	9165	9.23	5215;	File: "Z:\alinden\DATA\2017\06_Jun\170619[Ridhima_TOMTIM]w and wo blocking protein\RAW\TOMTIM+\R_Gomkale_Linden_TOMTIM+_A8.raw"; ID: "5215"; scans: "9165"	512.536
yes	DSS	427	1427	7945.63	2.99323	0	G	Z:\alinden\DATA\2017\06_Jun\170619[Ridhima_TOMTIM]w and wo blocking protein\RAW\TOMTIM+\R_Gomkale_Linden_TOMTIM+_A9b.raw;	0	Intra	14,C(Carbamidomethyl[C]);23,C(Carbamidomethyl[C]);28,C(Carbamidomethyl[C]);	8.54e-10	HTIGEDFDLIHLDCPQQPNGYDCGIYVCMNTLYGSADAPLDFDYKDAIR(45)-TSGTLVPELNEKDDDQVQK(1):0	PI_YEAST	PI_YEAST	sp|P1|PI_YEAST	sp|P1|PI_YEAST	sp|P1|PI_YEAST(204)-sp|P1|PI_YEAST(1)	44	204	1	14501	9.07	11472;	File: "Z:\alinden\DATA\2017\06_Jun\170619[Ridhima_TOMTIM]w and wo blocking protein\RAW\TOMTIM+\R_Gomkale_Linden_TOMTIM+_A9b.raw"; ID: "11472"; scans: "14501"	376.524
yes	DSS	371	1371	7961.63	3.00464	0	G	Z:\alinden\DATA\2017\06_Jun\170619[Ridhima_TOMTIM]w and wo blocking protein\RAW\TOMTIM+\R_Gomkale_Linden_TOMTIM+_A9.raw;	0	Intra	14,C(Carbamidomethyl[C]);23,C(Carbamidomethyl[C]);28,C(Carbamidomethyl[C]);29,M(Oxidation[M]);	1.38e-09	HTIGEDFDLIHLDCPQQPNGYDCGIYVCMNTLYGSADAPLDFDYKDAIR(45)-TSGTLVPELNEKDDDQVQK(1):0	PI_YEAST	PI_YEAST	sp|P1|PI_YEAST	sp|P1|PI_YEAST	sp|P1|PI_YEAST(204)-sp|P1|PI_YEAST(1)	44	204	1	15512	8.86	12632;	File: "Z:\alinden\DATA\2017\06_Jun\170619[Ridhima_TOMTIM]w and wo blocking protein\RAW\TOMTIM+\R_Gomkale_Linden_TOMTIM+_A9.raw"; ID: "12632"; scans: "15512"	377.2
yes	DSS	432	1432	7945.63	3.95419	0	G	Z:\alinden\DATA\2017\06_Jun\170619[Ridhima_TOMTIM]w and wo blocking protein\RAW\TOMTIM+\R_Gomkale_Linden_TOMTIM+_A9b.raw;	0	Intra	14,C(Carbamidomethyl[C]);23,C(Carbamidomethyl[C]);28,C(Carbamidomethyl[C]);	1.4e-09	HTIGEDFDLIHLDCPQQPNGYDCGIYVCMNTLYGSADAPLDFDYKDAIR(45)-TSGTLVPELNEKDDDQVQK(1):0	PI_YEAST	PI_YEAST	sp|P1|PI_YEAST	sp|P1|PI_YEAST	sp|P1|PI_YEAST(204)-sp|P1|PI_YEAST(1)	44	204	1	15353	8.85	12272;	File: "Z:\alinden\DATA\2017\06_Jun\170619[Ridhima_TOMTIM]w and wo blocking protein\RAW\TOMTIM+\R_Gomkale_Linden_TOMTIM+_A9b.raw"; ID: "12272"; scans: "15353"	497.345
yes	DSS	327	1327	7961.63	0.9905	0	G	Z:\alinden\DATA\2017\06_Jun\170619[Ridhima_TOMTIM]w and wo blocking protein\RAW\TOMTIM+\R_Gomkale_Linden_TOMTIM+_A8.raw;	0	Intra	14,C(Carbamidomethyl[C]);23,C(Carbamidomethyl[C]);28,C(Carbamidomethyl[C]);29,M(Oxidation[M]);	2.33e-09	HTIGEDFDLIHLDCPQQPNGYDCGIYVCMNTLYGSADAPLDFDYKDAIR(45)-TSGTLVPELNEKDDDQVQK(1):0	PI_YEAST	PI_YEAST	sp|P1|PI_YEAST	sp|P1|PI_YEAST	sp|P1|PI_YEAST(204)-sp|P1|PI_YEAST(1)	44	204	1	10289	8.63	6245;	File: "Z:\alinden\DATA\2017\06_Jun\170619[Ridhima_TOMTIM]w and wo blocking protein\RAW\TOMTIM+\R_Gomkale_Linden_TOMTIM+_A8.raw"; ID: "6245"; scans: "10289"	124.378
yes	DSS	337	1337	7945.63	2.98957	0	G	Z:\alinden\DATA\2017\06_Jun\170619[Ridhima_TOMTIM]w and wo blocking protein\RAW\TOMTIM+\R_Gomkale_Linden_TOMTIM+_A8b.raw;	0	Intra	14,C(Carbamidomethyl[C]);23,C(Carbamidomethyl[C]);28,C(Carbamidomethyl[C]);	3.12e-09	HTIGEDFDLIHLDCPQQPNGYDCGIYVCMNTLYGSADAPLDFDYKDAIR(45)-TSGTLVPELNEKDDDQVQK(1):0	PI_YEAST	PI_YEAST	sp|P1|PI_YEAST	sp|P1|PI_YEAST	sp|P1|PI_YEAST(204)-sp|P1|PI_YEAST(1)	44	204	1	9372	8.51	5397;	File: "Z:\alinden\DATA\2017\06_Jun\170619[Ridhima_TOMTIM]w and wo blocking protein\RAW\TOMTIM+\R_Gomkale_Linden_TOMTIM+_A8b.raw"; ID: "5397"; scans: "9372"	376.064
yes	DSS	425	1425	7945.63	3.97909	0	G	Z:\alinden\DATA\2017\06_Jun\170619[Ridhima_TOMTIM]w and wo blocking protein\RAW\TOMTIM+\R_Gomkale_Linden_TOMTIM+_A9b.raw;	0	Intra	14,C(Carbamidomethyl[C]);23,C(Carbamidomethyl[C]);28,C(Carbamidomethyl[C]);	9.99e-09	HTIGEDFDLIHLDCPQQPNGYDCGIYVCMNTLYGSADAPLDFDYKDAIR(45)-TSGTLVPELNEKDDDQVQK(1):0	PI_YEAST	PI_YEAST	sp|P1|PI_YEAST	sp|P1|PI_YEAST	sp|P1|PI_YEAST(204)-sp|P1|PI_YEAST(1)	44	204	1	14479	8	11452;	File: "Z:\alinden\DATA\2017\06_Jun\170619[Ridhima_TOMTIM]w and wo blocking protein\RAW\TOMTIM+\R_Gomkale_Linden_TOMTIM+_A9b.raw"; ID: "11452"; scans: "14479"	500.475
yes	DSS	426	1426	7961.63	3.97514	0	G	Z:\alinden\DATA\2017\06_Jun\170619[Ridhima_TOMTIM]w and wo blocking protein\RAW\TOMTIM+\R_Gomkale_Linden_TOMTIM+_A9b.raw;	0	Intra	14,C(Carbamidomethyl[C]);23,C(Carbamidomethyl[C]);28,C(Carbamidomethyl[C]);29,M(Oxidation[M]);	1.57e-08	HTIGEDFDLIHLDCPQQPNGYDCGIYVCMNTLYGSADAPLDFDYKDAIR(45)-TSGTLVPELNEKDDDQVQK(1):0	PI_YEAST	PI_YEAST	sp|P1|PI_YEAST	sp|P1|PI_YEAST	sp|P1|PI_YEAST(204)-sp|P1|PI_YEAST(1)	44	204	1	14492	7.8	11464;	File: "Z:\alinden\DATA\2017\06_Jun\170619[Ridhima_TOMTIM]w and wo blocking protein\RAW\TOMTIM+\R_Gomkale_Linden_TOMTIM+_A9b.raw"; ID: "11464"; scans: "14492"	498.975
yes	DSS	347	1347	7945.63	2.98735	0	G	Z:\alinden\DATA\2017\06_Jun\170619[Ridhima_TOMTIM]w and wo blocking protein\RAW\TOMTIM+\R_Gomkale_Linden_TOMTIM+_A8b.raw;	0	Intra	14,C(Carbamidomethyl[C]);23,C(Carbamidomethyl[C]);28,C(Carbamidomethyl[C]);	2.14e-08	HTIGEDFDLIHLDCPQQPNGYDCGIYVCMNTLYGSADAPLDFDYKDAIR(45)-TSGTLVPELNEKDDDQVQK(1):0	PI_YEAST	PI_YEAST	sp|P1|PI_YEAST	sp|P1|PI_YEAST	sp|P1|PI_YEAST(204)-sp|P1|PI_YEAST(1)	44	204	1	10667	7.67	6595;	File: "Z:\alinden\DATA\2017\06_Jun\170619[Ridhima_TOMTIM]w and wo blocking protein\RAW\TOMTIM+\R_Gomkale_Linden_TOMTIM+_A8b.raw"; ID: "6595"; scans: "10667"	375.785
yes	DSS	350	1350	7945.63	3.02767	0	G	Z:\alinden\DATA\2017\06_Jun\170619[Ridhima_TOMTIM]w and wo blocking protein\RAW\TOMTIM+\R_Gomkale_Linden_TOMTIM+_A8b.raw;	0	Intra	14,C(Carbamidomethyl[C]);23,C(Carbamidomethyl[C]);28,C(Carbamidomethyl[C]);	3.15e-08	HTIGEDFDLIHLDCPQQPNGYDCGIYVCMNTLYGSADAPLDFDYKDAIR(45)-TSGTLVPELNEKDDDQVQK(1):0	PI_YEAST	PI_YEAST	sp|P1|PI_YEAST	sp|P1|PI_YEAST	sp|P1|PI_YEAST(204)-sp|P1|PI_YEAST(1)	44	204	1	11366	7.5	7244;	File: "Z:\alinden\DATA\2017\06_Jun\170619[Ridhima_TOMTIM]w and wo blocking protein\RAW\TOMTIM+\R_Gomkale_Linden_TOMTIM+_A8b.raw"; ID: "7244"; scans: "11366"	380.855
yes	DSS	346	1346	7961.63	2.9981	0	G	Z:\alinden\DATA\2017\06_Jun\170619[Ridhima_TOMTIM]w and wo blocking protein\RAW\TOMTIM+\R_Gomkale_Linden_TOMTIM+_A8b.raw;	0	Intra	14,C(Carbamidomethyl[C]);23,C(Carbamidomethyl[C]);28,C(Carbamidomethyl[C]);29,M(Oxidation[M]);	4.47e-08	HTIGEDFDLIHLDCPQQPNGYDCGIYVCMNTLYGSADAPLDFDYKDAIR(45)-TSGTLVPELNEKDDDQVQK(1):0	PI_YEAST	PI_YEAST	sp|P1|PI_YEAST	sp|P1|PI_YEAST	sp|P1|PI_YEAST(204)-sp|P1|PI_YEAST(1)	44	204	1	10653	7.35	6582;	File: "Z:\alinden\DATA\2017\06_Jun\170619[Ridhima_TOMTIM]w and wo blocking protein\RAW\TOMTIM+\R_Gomkale_Linden_TOMTIM+_A8b.raw"; ID: "6582"; scans: "10653"	376.379
yes	DSS	343	1343	7945.63	4.02157	0	G	Z:\alinden\DATA\2017\06_Jun\170619[Ridhima_TOMTIM]w and wo blocking protein\RAW\TOMTIM+\R_Gomkale_Linden_TOMTIM+_A8b.raw;	0	Intra	14,C(Carbamidomethyl[C]);23,C(Carbamidomethyl[C]);28,C(Carbamidomethyl[C]);	2.67e-07	HTIGEDFDLIHLDCPQQPNGYDCGIYVCMNTLYGSADAPLDFDYKDAIR(45)-TSGTLVPELNEKDDDQVQK(1):0	PI_YEAST	PI_YEAST	sp|P1|PI_YEAST	sp|P1|PI_YEAST	sp|P1|PI_YEAST(204)-sp|P1|PI_YEAST(1)	44	204	1	10476	6.57	6417;	File: "Z:\alinden\DATA\2017\06_Jun\170619[Ridhima_TOMTIM]w and wo blocking protein\RAW\TOMTIM+\R_Gomkale_Linden_TOMTIM+_A8b.raw"; ID: "6417"; scans: "10476"	505.816
yes	DSS	332	1332	7961.63	1.0286	0	G	Z:\alinden\DATA\2017\06_Jun\170619[Ridhima_TOMTIM]w and wo blocking protein\RAW\TOMTIM+\R_Gomkale_Linden_TOMTIM+_A8b.raw;	0	Intra	14,C(Carbamidomethyl[C]);23,C(Carbamidomethyl[C]);28,C(Carbamidomethyl[C]);29,M(Oxidation[M]);	2.7e-07	HTIGEDFDLIHLDCPQQPNGYDCGIYVCMNTLYGSADAPLDFDYKDAIR(45)-TSGTLVPELNEKDDDQVQK(1):0	PI_YEAST	PI_YEAST	sp|P1|PI_YEAST	sp|P1|PI_YEAST	sp|P1|PI_YEAST(204)-sp|P1|PI_YEAST(1)	44	204	1	9261	6.57	5294;	File: "Z:\alinden\DATA\2017\06_Jun\170619[Ridhima_TOMTIM]w and wo blocking protein\RAW\TOMTIM+\R_Gomkale_Linden_TOMTIM+_A8b.raw"; ID: "5294"; scans: "9261"	129.162
yes	DSS	325	1325	7945.63	2.02207	0	G	Z:\alinden\DATA\2017\06_Jun\170619[Ridhima_TOMTIM]w and wo blocking protein\RAW\TOMTIM+\R_Gomkale_Linden_TOMTIM+_A8.raw;	0	Intra	14,C(Carbamidomethyl[C]);23,C(Carbamidomethyl[C]);28,C(Carbamidomethyl[C]);	3.11e-07	HTIGEDFDLIHLDCPQQPNGYDCGIYVCMNTLYGSADAPLDFDYKDAIR(45)-TSGTLVPELNEKDDDQVQK(1):0	PI_YEAST	PI_YEAST	sp|P1|PI_YEAST	sp|P1|PI_YEAST	sp|P1|PI_YEAST(204)-sp|P1|PI_YEAST(1)	44	204	1	9298	6.51	5339;	File: "Z:\alinden\DATA\2017\06_Jun\170619[Ridhima_TOMTIM]w and wo blocking protein\RAW\TOMTIM+\R_Gomkale_Linden_TOMTIM+_A8.raw"; ID: "5339"; scans: "9298"	254.391
yes	DSS	340	1340	7945.63	3.00055	0	G	Z:\alinden\DATA\2017\06_Jun\170619[Ridhima_TOMTIM]w and wo blocking protein\RAW\TOMTIM+\R_Gomkale_Linden_TOMTIM+_A8b.raw;	0	Intra	14,C(Carbamidomethyl[C]);23,C(Carbamidomethyl[C]);28,C(Carbamidomethyl[C]);	6.77e-07	HTIGEDFDLIHLDCPQQPNGYDCGIYVCMNTLYGSADAPLDFDYKDAIR(45)-TSGTLVPELNEKDDDQVQK(1):0	PI_YEAST	PI_YEAST	sp|P1|PI_YEAST	sp|P1|PI_YEAST	sp|P1|PI_YEAST(204)-sp|P1|PI_YEAST(1)	44	204	1	9480	6.17	5497;	File: "Z:\alinden\DATA\2017\06_Jun\170619[Ridhima_TOMTIM]w and wo blocking protein\RAW\TOMTIM+\R_Gomkale_Linden_TOMTIM+_A8b.raw"; ID: "5497"; scans: "9480"	377.445
yes	DSS	411	1411	7961.63	3.0164	0	G	Z:\alinden\DATA\2017\06_Jun\170619[Ridhima_TOMTIM]w and wo blocking protein\RAW\TOMTIM+\R_Gomkale_Linden_TOMTIM+_A9b.raw;	0	Intra	14,C(Carbamidomethyl[C]);23,C(Carbamidomethyl[C]);28,C(Carbamidomethyl[C]);29,M(Oxidation[M]);	9.41e-07	HTIGEDFDLIHLDCPQQPNGYDCGIYVCMNTLYGSADAPLDFDYKDAIR(45)-TSGTLVPELNEKDDDQVQK(1):0	PI_YEAST	PI_YEAST	sp|P1|PI_YEAST	sp|P1|PI_YEAST	sp|P1|PI_YEAST(204)-sp|P1|PI_YEAST(1)	44	204	1	13016	6.03	10078;	File: "Z:\alinden\DATA\2017\06_Jun\170619[Ridhima_TOMTIM]w and wo blocking protein\RAW\TOMTIM+\R_Gomkale_Linden_TOMTIM+_A9b.raw"; ID: "10078"; scans: "13016"	378.676
yes	DSS	324	1324	7945.63	4.02514	0	G	Z:\alinden\DATA\2017\06_Jun\170619[Ridhima_TOMTIM]w and wo blocking protein\RAW\TOMTIM+\R_Gomkale_Linden_TOMTIM+_A8.raw;	0	Intra	14,C(Carbamidomethyl[C]);23,C(Carbamidomethyl[C]);28,C(Carbamidomethyl[C]);	4.3e-06	HTIGEDFDLIHLDCPQQPNGYDCGIYVCMNTLYGSADAPLDFDYKDAIR(45)-TSGTLVPELNEKDDDQVQK(1):0	PI_YEAST	PI_YEAST	sp|P1|PI_YEAST	sp|P1|PI_YEAST	sp|P1|PI_YEAST(204)-sp|P1|PI_YEAST(1)	44	204	1	9212	5.37	5260;	File: "Z:\alinden\DATA\2017\06_Jun\170619[Ridhima_TOMTIM]w and wo blocking protein\RAW\TOMTIM+\R_Gomkale_Linden_TOMTIM+_A8.raw"; ID: "5260"; scans: "9212"	506.265
yes	DSS	420	1420	7945.63	3.00349	0	G	Z:\alinden\DATA\2017\06_Jun\170619[Ridhima_TOMTIM]w and wo blocking protein\RAW\TOMTIM+\R_Gomkale_Linden_TOMTIM+_A9b.raw;	0	Intra	14,C(Carbamidomethyl[C]);23,C(Carbamidomethyl[C]);28,C(Carbamidomethyl[C]);	6.43e-06	HTIGEDFDLIHLDCPQQPNGYDCGIYVCMNTLYGSADAPLDFDYKDAIR(45)-TSGTLVPELNEKDDDQVQK(1):0	PI_YEAST	PI_YEAST	sp|P1|PI_YEAST	sp|P1|PI_YEAST	sp|P1|PI_YEAST(204)-sp|P1|PI_YEAST(1)	44	204	1	14299	5.19	11283;	File: "Z:\alinden\DATA\2017\06_Jun\170619[Ridhima_TOMTIM]w and wo blocking protein\RAW\TOMTIM+\R_Gomkale_Linden_TOMTIM+_A9b.raw"; ID: "11283"; scans: "14299"	377.814
yes	DSS	342	1342	7945.63	4.03105	0	G	Z:\alinden\DATA\2017\06_Jun\170619[Ridhima_TOMTIM]w and wo blocking protein\RAW\TOMTIM+\R_Gomkale_Linden_TOMTIM+_A8b.raw;	0	Intra	14,C(Carbamidomethyl[C]);23,C(Carbamidomethyl[C]);28,C(Carbamidomethyl[C]);	7.24e-06	HTIGEDFDLIHLDCPQQPNGYDCGIYVCMNTLYGSADAPLDFDYKDAIR(45)-TSGTLVPELNEKDDDQVQK(1):0	PI_YEAST	PI_YEAST	sp|P1|PI_YEAST	sp|P1|PI_YEAST	sp|P1|PI_YEAST(204)-sp|P1|PI_YEAST(1)	44	204	1	10348	5.14	6298;	File: "Z:\alinden\DATA\2017\06_Jun\170619[Ridhima_TOMTIM]w and wo blocking protein\RAW\TOMTIM+\R_Gomkale_Linden_TOMTIM+_A8b.raw"; ID: "6298"; scans: "10348"	507.007
yes	DSS	339	1339	7945.63	4.01828	0	G	Z:\alinden\DATA\2017\06_Jun\170619[Ridhima_TOMTIM]w and wo blocking protein\RAW\TOMTIM+\R_Gomkale_Linden_TOMTIM+_A8b.raw;	0	Intra	14,C(Carbamidomethyl[C]);23,C(Carbamidomethyl[C]);28,C(Carbamidomethyl[C]);	1.02e-05	HTIGEDFDLIHLDCPQQPNGYDCGIYVCMNTLYGSADAPLDFDYKDAIR(45)-TSGTLVPELNEKDDDQVQK(1):0	PI_YEAST	PI_YEAST	sp|P1|PI_YEAST	sp|P1|PI_YEAST	sp|P1|PI_YEAST(204)-sp|P1|PI_YEAST(1)	44	204	1	9395	4.99	5419;	File: "Z:\alinden\DATA\2017\06_Jun\170619[Ridhima_TOMTIM]w and wo blocking protein\RAW\TOMTIM+\R_Gomkale_Linden_TOMTIM+_A8b.raw"; ID: "5419"; scans: "9395"	505.402
yes	DSS	431	1431	7961.63	1.98002	0	G	Z:\alinden\DATA\2017\06_Jun\170619[Ridhima_TOMTIM]w and wo blocking protein\RAW\TOMTIM+\R_Gomkale_Linden_TOMTIM+_A9b.raw;	0	Intra	14,C(Carbamidomethyl[C]);23,C(Carbamidomethyl[C]);28,C(Carbamidomethyl[C]);29,M(Oxidation[M]);	1.2e-05	HTIGEDFDLIHLDCPQQPNGYDCGIYVCMNTLYGSADAPLDFDYKDAIR(45)-TSGTLVPELNEKDDDQVQK(1):0	PI_YEAST	PI_YEAST	sp|P1|PI_YEAST	sp|P1|PI_YEAST	sp|P1|PI_YEAST(204)-sp|P1|PI_YEAST(1)	44	204	1	14752	4.92	11707;	File: "Z:\alinden\DATA\2017\06_Jun\170619[Ridhima_TOMTIM]w and wo blocking protein\RAW\TOMTIM+\R_Gomkale_Linden_TOMTIM+_A9b.raw"; ID: "11707"; scans: "14752"	248.602
yes	DSS	421	1421	7945.63	1.99654	0	Y	Z:\alinden\DATA\2017\06_Jun\170619[Ridhima_TOMTIM]w and wo blocking protein\RAW\TOMTIM+\R_Gomkale_Linden_TOMTIM+_A9b.raw;	0	Intra	14,C(Carbamidomethyl[C]);23,C(Carbamidomethyl[C]);28,C(Carbamidomethyl[C]);	0.000381	HTIGEDFDLIHLDCPQQPNGYDCGIYVCMNTLYGSADAPLDFDYKDAIR(45)-TSGTLVPELNEKDDDQVQK(1):0	PI_YEAST	PI_YEAST	sp|P1|PI_YEAST	sp|P1|PI_YEAST	sp|P1|PI_YEAST(204)-sp|P1|PI_YEAST(1)	44	204	1	14309	3.42	11292;	File: "Z:\alinden\DATA\2017\06_Jun\170619[Ridhima_TOMTIM]w and wo blocking protein\RAW\TOMTIM+\R_Gomkale_Linden_TOMTIM+_A9b.raw"; ID: "11292"; scans: "14309"	251.18
yes	DSS	348	1348	7961.63	-0.01438	0	R	Z:\alinden\DATA\2017\06_Jun\170619[Ridhima_TOMTIM]w and wo blocking protein\RAW\TOMTIM+\R_Gomkale_Linden_TOMTIM+_A8b.raw;	0	Intra	14,C(Carbamidomethyl[C]);23,C(Carbamidomethyl[C]);28,C(Carbamidomethyl[C]);29,M(Oxidation[M]);	0.000663	HTIGEDFDLIHLDCPQQPNGYDCGIYVCMNTLYGSADAPLDFDYKDAIR(45)-TSGTLVPELNEKDDDQVQK(1):0	PI_YEAST	PI_YEAST	sp|P1|PI_YEAST	sp|P1|PI_YEAST	sp|P1|PI_YEAST(204)-sp|P1|PI_YEAST(1)	44	204	1	10715	3.18	6639;	File: "Z:\alinden\DATA\2017\06_Jun\170619[Ridhima_TOMTIM]w and wo blocking protein\RAW\TOMTIM+\R_Gomkale_Linden_TOMTIM+_A8b.raw"; ID: "6639"; scans: "10715"	-1.80594
yes	DSS	336	1336	7945.63	2.03161	0	R	Z:\alinden\DATA\2017\06_Jun\170619[Ridhima_TOMTIM]w and wo blocking protein\RAW\TOMTIM+\R_Gomkale_Linden_TOMTIM+_A8b.raw;	0	Intra	14,C(Carbamidomethyl[C]);23,C(Carbamidomethyl[C]);28,C(Carbamidomethyl[C]);	0.00149	HTIGEDFDLIHLDCPQQPNGYDCGIYVCMNTLYGSADAPLDFDYKDAIR(45)-TSGTLVPELNEKDDDQVQK(1):0	PI_YEAST	PI_YEAST	sp|P1|PI_YEAST	sp|P1|PI_YEAST	sp|P1|PI_YEAST(204)-sp|P1|PI_YEAST(1)	44	204	1	9369	2.83	5395;	File: "Z:\alinden\DATA\2017\06_Jun\170619[Ridhima_TOMTIM]w and wo blocking protein\RAW\TOMTIM+\R_Gomkale_Linden_TOMTIM+_A8b.raw"; ID: "5395"; scans: "9369"	255.591
yes	DSS	326	1326	7945.63	1.99273	0	R	Z:\alinden\DATA\2017\06_Jun\170619[Ridhima_TOMTIM]w and wo blocking protein\RAW\TOMTIM+\R_Gomkale_Linden_TOMTIM+_A8.raw;	0	Intra	14,C(Carbamidomethyl[C]);23,C(Carbamidomethyl[C]);28,C(Carbamidomethyl[C]);	0.00206	HTIGEDFDLIHLDCPQQPNGYDCGIYVCMNTLYGSADAPLDFDYKDAIR(45)-TSGTLVPELNEKDDDQVQK(1):0	PI_YEAST	PI_YEAST	sp|P1|PI_YEAST	sp|P1|PI_YEAST	sp|P1|PI_YEAST(204)-sp|P1|PI_YEAST(1)	44	204	1	10070	2.69	6047;	File: "Z:\alinden\DATA\2017\06_Jun\170619[Ridhima_TOMTIM]w and wo blocking protein\RAW\TOMTIM+\R_Gomkale_Linden_TOMTIM+_A8.raw"; ID: "6047"; scans: "10070"	250.701
yes	DSS	366	1366	7945.63	2.00599	0	Y	Z:\alinden\DATA\2017\06_Jun\170619[Ridhima_TOMTIM]w and wo blocking protein\RAW\TOMTIM+\R_Gomkale_Linden_TOMTIM+_A9.raw;	0	Intra	14,C(Carbamidomethyl[C]);23,C(Carbamidomethyl[C]);28,C(Carbamidomethyl[C]);	0.0134	HTIGEDFDLIHLDCPQQPNGYDCGIYVCMNTLYGSADAPLDFDYKDAIR(45)-TSGTLVPELNEKDDDQVQK(1):0	PI_YEAST	PI_YEAST	sp|P1|PI_YEAST	sp|P1|PI_YEAST	sp|P1|PI_YEAST(204)-sp|P1|PI_YEAST(1)	44	204	1	15059	1.87	12207;	File: "Z:\alinden\DATA\2017\06_Jun\170619[Ridhima_TOMTIM]w and wo blocking protein\RAW\TOMTIM+\R_Gomkale_Linden_TOMTIM+_A9.raw"; ID: "12207"; scans: "15059"	252.369
yes	DSS	338	1338	7961.63	2.98856	0	R	Z:\alinden\DATA\2017\06_Jun\170619[Ridhima_TOMTIM]w and wo blocking protein\RAW\TOMTIM+\R_Gomkale_Linden_TOMTIM+_A8b.raw;	0	Intra	14,C(Carbamidomethyl[C]);23,C(Carbamidomethyl[C]);28,C(Carbamidomethyl[C]);29,M(Oxidation[M]);	0.0312	HTIGEDFDLIHLDCPQQPNGYDCGIYVCMNTLYGSADAPLDFDYKDAIR(45)-TSGTLVPELNEKDDDQVQK(1):0	PI_YEAST	PI_YEAST	sp|P1|PI_YEAST	sp|P1|PI_YEAST	sp|P1|PI_YEAST(204)-sp|P1|PI_YEAST(1)	44	204	1	9375	1.51	5400;	File: "Z:\alinden\DATA\2017\06_Jun\170619[Ridhima_TOMTIM]w and wo blocking protein\RAW\TOMTIM+\R_Gomkale_Linden_TOMTIM+_A8b.raw"; ID: "5400"; scans: "9375"	375.182
yes	DSS	135	1135	2319.32	0.00175	0	Y	Z:\alinden\DATA\2017\06_Jun\170619[Ridhima_TOMTIM]w and wo blocking protein\RAW\TOMTIM+\R_Gomkale_Linden_TOMTIM+_A11.raw;	0	Intra	null	1.59e-18	IALVHLEAKESK(9)-KLDKEGR(1):0	Tim21_YEAST	Tim21_YEAST	sp|P13|Tim21_YEAST	sp|P13|Tim21_YEAST	sp|P13|Tim21_YEAST(190)-sp|P13|Tim21_YEAST(161)	8	190	161	4861	17.8	3440;	File: "Z:\alinden\DATA\2017\06_Jun\170619[Ridhima_TOMTIM]w and wo blocking protein\RAW\TOMTIM+\R_Gomkale_Linden_TOMTIM+_A11.raw"; ID: "3440"; scans: "4861"	0.754205
yes	DSS	227	1227	2319.32	0.00055	0	Y	Z:\alinden\DATA\2017\06_Jun\170619[Ridhima_TOMTIM]w and wo blocking protein\RAW\TOMTIM+\R_Gomkale_Linden_TOMTIM+_A12.raw;	0	Intra	null	8.56e-18	IALVHLEAKESK(9)-KLDKEGR(1):0	Tim21_YEAST	Tim21_YEAST	sp|P13|Tim21_YEAST	sp|P13|Tim21_YEAST	sp|P13|Tim21_YEAST(190)-sp|P13|Tim21_YEAST(161)	8	190	161	5304	17.07	3835;	File: "Z:\alinden\DATA\2017\06_Jun\170619[Ridhima_TOMTIM]w and wo blocking protein\RAW\TOMTIM+\R_Gomkale_Linden_TOMTIM+_A12.raw"; ID: "3835"; scans: "5304"	0.237036
yes	DSS	226	1226	2319.32	-0.00099	0	Y	Z:\alinden\DATA\2017\06_Jun\170619[Ridhima_TOMTIM]w and wo blocking protein\RAW\TOMTIM+\R_Gomkale_Linden_TOMTIM+_A12.raw;	0	Intra	null	6.36e-16	IALVHLEAKESK(9)-KLDKEGR(1):0	Tim21_YEAST	Tim21_YEAST	sp|P13|Tim21_YEAST	sp|P13|Tim21_YEAST	sp|P13|Tim21_YEAST(190)-sp|P13|Tim21_YEAST(161)	8	190	161	5296	15.2	3828;	File: "Z:\alinden\DATA\2017\06_Jun\170619[Ridhima_TOMTIM]w and wo blocking protein\RAW\TOMTIM+\R_Gomkale_Linden_TOMTIM+_A12.raw"; ID: "3828"; scans: "5296"	-0.426665
yes	DSS	136	1136	2319.32	0.00048	0	Y	Z:\alinden\DATA\2017\06_Jun\170619[Ridhima_TOMTIM]w and wo blocking protein\RAW\TOMTIM+\R_Gomkale_Linden_TOMTIM+_A11.raw;	0	Intra	null	7.14e-16	IALVHLEAKESK(9)-KLDKEGR(1):0	Tim21_YEAST	Tim21_YEAST	sp|P13|Tim21_YEAST	sp|P13|Tim21_YEAST	sp|P13|Tim21_YEAST(190)-sp|P13|Tim21_YEAST(161)	8	190	161	4872	15.15	3450;	File: "Z:\alinden\DATA\2017\06_Jun\170619[Ridhima_TOMTIM]w and wo blocking protein\RAW\TOMTIM+\R_Gomkale_Linden_TOMTIM+_A11.raw"; ID: "3450"; scans: "4872"	0.206868
yes	DSS	137	1137	2319.32	-0.0028	0	G	Z:\alinden\DATA\2017\06_Jun\170619[Ridhima_TOMTIM]w and wo blocking protein\RAW\TOMTIM+\R_Gomkale_Linden_TOMTIM+_A11.raw;	0	Intra	null	4.9e-14	IALVHLEAKESK(9)-KLDKEGR(1):0	Tim21_YEAST	Tim21_YEAST	sp|P13|Tim21_YEAST	sp|P13|Tim21_YEAST	sp|P13|Tim21_YEAST(190)-sp|P13|Tim21_YEAST(161)	8	190	161	4876	13.31	3454;	File: "Z:\alinden\DATA\2017\06_Jun\170619[Ridhima_TOMTIM]w and wo blocking protein\RAW\TOMTIM+\R_Gomkale_Linden_TOMTIM+_A11.raw"; ID: "3454"; scans: "4876"	-1.20673
yes	DSS	139	1139	2319.32	0.00103	0	G	Z:\alinden\DATA\2017\06_Jun\170619[Ridhima_TOMTIM]w and wo blocking protein\RAW\TOMTIM+\R_Gomkale_Linden_TOMTIM+_A11.raw;	0	Intra	null	8.35e-13	IALVHLEAKESK(9)-KLDKEGR(1):0	Tim21_YEAST	Tim21_YEAST	sp|P13|Tim21_YEAST	sp|P13|Tim21_YEAST	sp|P13|Tim21_YEAST(190)-sp|P13|Tim21_YEAST(161)	8	190	161	4994	12.08	3565;	File: "Z:\alinden\DATA\2017\06_Jun\170619[Ridhima_TOMTIM]w and wo blocking protein\RAW\TOMTIM+\R_Gomkale_Linden_TOMTIM+_A11.raw"; ID: "3565"; scans: "4994"	0.443903
yes	DSS	140	1140	2319.32	-0.00093	0	G	Z:\alinden\DATA\2017\06_Jun\170619[Ridhima_TOMTIM]w and wo blocking protein\RAW\TOMTIM+\R_Gomkale_Linden_TOMTIM+_A11.raw;	0	Intra	null	4.42e-09	IALVHLEAKESK(9)-KLDKEGR(1):0	Tim21_YEAST	Tim21_YEAST	sp|P13|Tim21_YEAST	sp|P13|Tim21_YEAST	sp|P13|Tim21_YEAST(190)-sp|P13|Tim21_YEAST(161)	8	190	161	5009	8.35	3579;	File: "Z:\alinden\DATA\2017\06_Jun\170619[Ridhima_TOMTIM]w and wo blocking protein\RAW\TOMTIM+\R_Gomkale_Linden_TOMTIM+_A11.raw"; ID: "3579"; scans: "5009"	-0.400806
yes	DSS	228	1228	2319.32	0.0015	0	Y	Z:\alinden\DATA\2017\06_Jun\170619[Ridhima_TOMTIM]w and wo blocking protein\RAW\TOMTIM+\R_Gomkale_Linden_TOMTIM+_A12.raw;	0	Intra	null	9.16e-08	IALVHLEAKESK(9)-KLDKEGR(1):0	Tim21_YEAST	Tim21_YEAST	sp|P13|Tim21_YEAST	sp|P13|Tim21_YEAST	sp|P13|Tim21_YEAST(190)-sp|P13|Tim21_YEAST(161)	8	190	161	5306	7.04	3837;	File: "Z:\alinden\DATA\2017\06_Jun\170619[Ridhima_TOMTIM]w and wo blocking protein\RAW\TOMTIM+\R_Gomkale_Linden_TOMTIM+_A12.raw"; ID: "3837"; scans: "5306"	0.646461
yes	DSS	240	1240	2319.32	-0.00261	0	Y	Z:\alinden\DATA\2017\06_Jun\170619[Ridhima_TOMTIM]w and wo blocking protein\RAW\TOMTIM+\R_Gomkale_Linden_TOMTIM+_A12.raw;	0	Intra	null	4.75e-11	IALVHLEAKESK(9)-KLDKEGR(4):0	Tim21_YEAST	Tim21_YEAST	sp|P13|Tim21_YEAST	sp|P13|Tim21_YEAST	sp|P13|Tim21_YEAST(190)-sp|P13|Tim21_YEAST(164)	5	190	164	5996	10.32	4486;	File: "Z:\alinden\DATA\2017\06_Jun\170619[Ridhima_TOMTIM]w and wo blocking protein\RAW\TOMTIM+\R_Gomkale_Linden_TOMTIM+_A12.raw"; ID: "4486"; scans: "5996"	-1.12484
yes	DSS	145	1145	2319.32	0.00079	0	Y	Z:\alinden\DATA\2017\06_Jun\170619[Ridhima_TOMTIM]w and wo blocking protein\RAW\TOMTIM+\R_Gomkale_Linden_TOMTIM+_A11.raw;	0	Intra	null	6.92e-09	IALVHLEAKESK(9)-KLDKEGR(4):0	Tim21_YEAST	Tim21_YEAST	sp|P13|Tim21_YEAST	sp|P13|Tim21_YEAST	sp|P13|Tim21_YEAST(190)-sp|P13|Tim21_YEAST(164)	5	190	164	5489	8.16	4031;	File: "Z:\alinden\DATA\2017\06_Jun\170619[Ridhima_TOMTIM]w and wo blocking protein\RAW\TOMTIM+\R_Gomkale_Linden_TOMTIM+_A11.raw"; ID: "4031"; scans: "5489"	0.34047
yes	DSS	144	1144	2319.32	0.00075	0	G	Z:\alinden\DATA\2017\06_Jun\170619[Ridhima_TOMTIM]w and wo blocking protein\RAW\TOMTIM+\R_Gomkale_Linden_TOMTIM+_A11.raw;	0	Intra	null	2.94e-08	IALVHLEAKESK(9)-KLDKEGR(4):0	Tim21_YEAST	Tim21_YEAST	sp|P13|Tim21_YEAST	sp|P13|Tim21_YEAST	sp|P13|Tim21_YEAST(190)-sp|P13|Tim21_YEAST(164)	5	190	164	5482	7.53	4025;	File: "Z:\alinden\DATA\2017\06_Jun\170619[Ridhima_TOMTIM]w and wo blocking protein\RAW\TOMTIM+\R_Gomkale_Linden_TOMTIM+_A11.raw"; ID: "4025"; scans: "5482"	0.323231
yes	DSS	238	1238	2319.32	-0.00385	0	Y	Z:\alinden\DATA\2017\06_Jun\170619[Ridhima_TOMTIM]w and wo blocking protein\RAW\TOMTIM+\R_Gomkale_Linden_TOMTIM+_A12.raw;	0	Intra	null	7.95e-08	IALVHLEAKESK(9)-KLDKEGR(4):0	Tim21_YEAST	Tim21_YEAST	sp|P13|Tim21_YEAST	sp|P13|Tim21_YEAST	sp|P13|Tim21_YEAST(190)-sp|P13|Tim21_YEAST(164)	5	190	164	5993	7.1	4483;	File: "Z:\alinden\DATA\2017\06_Jun\170619[Ridhima_TOMTIM]w and wo blocking protein\RAW\TOMTIM+\R_Gomkale_Linden_TOMTIM+_A12.raw"; ID: "4483"; scans: "5993"	-1.65925
yes	DSS	239	1239	2319.32	-0.0017	0	Y	Z:\alinden\DATA\2017\06_Jun\170619[Ridhima_TOMTIM]w and wo blocking protein\RAW\TOMTIM+\R_Gomkale_Linden_TOMTIM+_A12.raw;	0	Intra	null	2.07e-06	IALVHLEAKESK(9)-KLDKEGR(4):0	Tim21_YEAST	Tim21_YEAST	sp|P13|Tim21_YEAST	sp|P13|Tim21_YEAST	sp|P13|Tim21_YEAST(190)-sp|P13|Tim21_YEAST(164)	5	190	164	5995	5.68	4485;	File: "Z:\alinden\DATA\2017\06_Jun\170619[Ridhima_TOMTIM]w and wo blocking protein\RAW\TOMTIM+\R_Gomkale_Linden_TOMTIM+_A12.raw"; ID: "4485"; scans: "5995"	-0.732657
yes	DSS	407	1407	3646.05	4.0043	0	R	Z:\alinden\DATA\2017\06_Jun\170619[Ridhima_TOMTIM]w and wo blocking protein\RAW\TOMTIM+\R_Gomkale_Linden_TOMTIM+_A9.raw;	0	Intra	null	0.022	IFTPINLNQSHWALGIIDLKK(20)-KTQIDKLDK(6):0	PI_YEAST	PI_YEAST	sp|P1|PI_YEAST	sp|P1|PI_YEAST	sp|P1|PI_YEAST(125)-sp|P1|PI_YEAST(102)	1	125	102	9967	1.66	7430;	File: "Z:\alinden\DATA\2017\06_Jun\170619[Ridhima_TOMTIM]w and wo blocking protein\RAW\TOMTIM+\R_Gomkale_Linden_TOMTIM+_A9.raw"; ID: "7430"; scans: "9967"	1096.75
yes	DSS	56	1,56	2587.42	0.00982	0	R	Z:\alinden\DATA\2017\06_Jun\170619[Ridhima_TOMTIM]w and wo blocking protein\RAW\TOMTIM+\R_Gomkale_Linden_TOMTIM+_A10b.raw;	1	Inter	null	0.000556	INEAKDFLEKR(10)-KTQIDKLDK(6):0	Pam18_YEAST	PI_YEAST	sp|P17|Pam18_YEAST	sp|P1|PI_YEAST	sp|P17|Pam18_YEAST(163)-sp|P1|PI_YEAST(102)	1	163	102	17543	3.25	15567;	File: "Z:\alinden\DATA\2017\06_Jun\170619[Ridhima_TOMTIM]w and wo blocking protein\RAW\TOMTIM+\R_Gomkale_Linden_TOMTIM+_A10b.raw"; ID: "15567"; scans: "17543"	3.79379
yes	DSS	148	1148	2708.43	0.00295	0	R	Z:\alinden\DATA\2017\06_Jun\170619[Ridhima_TOMTIM]w and wo blocking protein\RAW\TOMTIM+\R_Gomkale_Linden_TOMTIM+_A11.raw;	0	Intra	null	4.52e-08	IVKHSNGDAWVEAR(3)-DIKQVPYK(3):0	Hsp70Ssc1_YEAST	Hsp70Ssc1_YEAST	sp|P15|Hsp70Ssc1_YEAST	sp|P15|Hsp70Ssc1_YEAST	sp|P15|Hsp70Ssc1_YEAST(123)-sp|P15|Hsp70Ssc1_YEAST(115)	1	123	115	6269	7.34	4767;	File: "Z:\alinden\DATA\2017\06_Jun\170619[Ridhima_TOMTIM]w and wo blocking protein\RAW\TOMTIM+\R_Gomkale_Linden_TOMTIM+_A11.raw"; ID: "4767"; scans: "6269"	1.08879
yes	DSS	243	1243	2262.26	-0.0015	0	R	Z:\alinden\DATA\2017\06_Jun\170619[Ridhima_TOMTIM]w and wo blocking protein\RAW\TOMTIM+\R_Gomkale_Linden_TOMTIM+_A12.raw;	1	Inter	3,M(Oxidation[M]);	0.000711	KAMVRNHPDR(1)-GDVKVLKK(7):0	Mdj2_YEAST	Tim44_YEAST	sp|P19|Mdj2_YEAST	sp|P14|Tim44_YEAST	sp|P19|Mdj2_YEAST(111)-sp|P14|Tim44_YEAST(314)	1	111	314	6687	3.15	5135;	File: "Z:\alinden\DATA\2017\06_Jun\170619[Ridhima_TOMTIM]w and wo blocking protein\RAW\TOMTIM+\R_Gomkale_Linden_TOMTIM+_A12.raw"; ID: "5135"; scans: "6687"	-0.662758
yes	DSS	269	1269	1616.91	0.00401	0	R	Z:\alinden\DATA\2017\06_Jun\170619[Ridhima_TOMTIM]w and wo blocking protein\RAW\TOMTIM+\R_Gomkale_Linden_TOMTIM+_A13.raw;	0	Intra	null	4.63e-07	KKTQIDK(2)-WMKR(3):0	PI_YEAST	PI_YEAST	sp|P1|PI_YEAST	sp|P1|PI_YEAST	sp|P1|PI_YEAST(97)-sp|P1|PI_YEAST(94)	3	97	94	3061	6.33	1749;	File: "Z:\alinden\DATA\2017\06_Jun\170619[Ridhima_TOMTIM]w and wo blocking protein\RAW\TOMTIM+\R_Gomkale_Linden_TOMTIM+_A13.raw"; ID: "1749"; scans: "3061"	2.47849
yes	DSS	169	1169	2516.34	-0.00772	0	Y	Z:\alinden\DATA\2017\06_Jun\170619[Ridhima_TOMTIM]w and wo blocking protein\RAW\TOMTIM+\R_Gomkale_Linden_TOMTIM+_A12.raw;	1	Inter	null	1.14e-07	KLPIWTIDQSR(1)-LNYGWDKK(7):0	Jac1_YEAST	Tom40_YEAST	sp|P2|Jac1_YEAST	sp|P3|Tom40_YEAST	sp|P2|Jac1_YEAST(25)-sp|P3|Tom40_YEAST(147)	1	25	147	13634	6.94	11653;	File: "Z:\alinden\DATA\2017\06_Jun\170619[Ridhima_TOMTIM]w and wo blocking protein\RAW\TOMTIM+\R_Gomkale_Linden_TOMTIM+_A12.raw"; ID: "11653"; scans: "13634"	-3.06673
yes	DSS	134	1134	2485.35	8e-05	0	G	Z:\alinden\DATA\2017\06_Jun\170619[Ridhima_TOMTIM]w and wo blocking protein\RAW\TOMTIM+\R_Gomkale_Linden_TOMTIM+_A11.raw;	0	Intra	null	2.34e-10	KTGETMEHIATK(1)-GSTIVGKTLK(7):0	Tim44_YEAST	Tim44_YEAST	sp|P14|Tim44_YEAST	sp|P14|Tim44_YEAST	sp|P14|Tim44_YEAST(111)-sp|P14|Tim44_YEAST(107)	8	111	107	4836	9.63	3416;	File: "Z:\alinden\DATA\2017\06_Jun\170619[Ridhima_TOMTIM]w and wo blocking protein\RAW\TOMTIM+\R_Gomkale_Linden_TOMTIM+_A11.raw"; ID: "3416"; scans: "4836"	0.032176
yes	DSS	224	1224	2485.35	-0.00412	0	G	Z:\alinden\DATA\2017\06_Jun\170619[Ridhima_TOMTIM]w and wo blocking protein\RAW\TOMTIM+\R_Gomkale_Linden_TOMTIM+_A12.raw;	0	Intra	null	1.27e-09	KTGETMEHIATK(1)-GSTIVGKTLK(7):0	Tim44_YEAST	Tim44_YEAST	sp|P14|Tim44_YEAST	sp|P14|Tim44_YEAST	sp|P14|Tim44_YEAST(111)-sp|P14|Tim44_YEAST(107)	8	111	107	5236	8.9	3771;	File: "Z:\alinden\DATA\2017\06_Jun\170619[Ridhima_TOMTIM]w and wo blocking protein\RAW\TOMTIM+\R_Gomkale_Linden_TOMTIM+_A12.raw"; ID: "3771"; scans: "5236"	-1.65705
yes	DSS	231	1231	2485.35	-0.00265	0	Y	Z:\alinden\DATA\2017\06_Jun\170619[Ridhima_TOMTIM]w and wo blocking protein\RAW\TOMTIM+\R_Gomkale_Linden_TOMTIM+_A12.raw;	0	Intra	null	2.55e-09	KTGETMEHIATK(1)-GSTIVGKTLK(7):0	Tim44_YEAST	Tim44_YEAST	sp|P14|Tim44_YEAST	sp|P14|Tim44_YEAST	sp|P14|Tim44_YEAST(111)-sp|P14|Tim44_YEAST(107)	8	111	107	5403	8.59	3928;	File: "Z:\alinden\DATA\2017\06_Jun\170619[Ridhima_TOMTIM]w and wo blocking protein\RAW\TOMTIM+\R_Gomkale_Linden_TOMTIM+_A12.raw"; ID: "3928"; scans: "5403"	-1.06582
yes	DSS	206	1206	2501.34	0.00201	0	G	Z:\alinden\DATA\2017\06_Jun\170619[Ridhima_TOMTIM]w and wo blocking protein\RAW\TOMTIM+\R_Gomkale_Linden_TOMTIM+_A12.raw;	0	Intra	6,M(Oxidation[M]);	9.17e-09	KTGETMEHIATK(1)-GSTIVGKTLK(7):0	Tim44_YEAST	Tim44_YEAST	sp|P14|Tim44_YEAST	sp|P14|Tim44_YEAST	sp|P14|Tim44_YEAST(111)-sp|P14|Tim44_YEAST(107)	8	111	107	3924	8.04	2540;	File: "Z:\alinden\DATA\2017\06_Jun\170619[Ridhima_TOMTIM]w and wo blocking protein\RAW\TOMTIM+\R_Gomkale_Linden_TOMTIM+_A12.raw"; ID: "2540"; scans: "3924"	0.803245
yes	DSS	225	1225	2485.35	-0.00577	0	G	Z:\alinden\DATA\2017\06_Jun\170619[Ridhima_TOMTIM]w and wo blocking protein\RAW\TOMTIM+\R_Gomkale_Linden_TOMTIM+_A12.raw;	0	Intra	null	1.91e-07	KTGETMEHIATK(1)-GSTIVGKTLK(7):0	Tim44_YEAST	Tim44_YEAST	sp|P14|Tim44_YEAST	sp|P14|Tim44_YEAST	sp|P14|Tim44_YEAST(111)-sp|P14|Tim44_YEAST(107)	8	111	107	5269	6.72	3802;	File: "Z:\alinden\DATA\2017\06_Jun\170619[Ridhima_TOMTIM]w and wo blocking protein\RAW\TOMTIM+\R_Gomkale_Linden_TOMTIM+_A12.raw"; ID: "3802"; scans: "5269"	-2.32067
yes	DSS	232	1232	2485.35	0.00375	0	G	Z:\alinden\DATA\2017\06_Jun\170619[Ridhima_TOMTIM]w and wo blocking protein\RAW\TOMTIM+\R_Gomkale_Linden_TOMTIM+_A12.raw;	0	Intra	null	1.87e-06	KTGETMEHIATK(1)-GSTIVGKTLK(7):0	Tim44_YEAST	Tim44_YEAST	sp|P14|Tim44_YEAST	sp|P14|Tim44_YEAST	sp|P14|Tim44_YEAST(111)-sp|P14|Tim44_YEAST(107)	8	111	107	5425	5.73	3949;	File: "Z:\alinden\DATA\2017\06_Jun\170619[Ridhima_TOMTIM]w and wo blocking protein\RAW\TOMTIM+\R_Gomkale_Linden_TOMTIM+_A12.raw"; ID: "3949"; scans: "5425"	1.50823
yes	DSS	127	1127	2501.34	-0.00168	0	G	Z:\alinden\DATA\2017\06_Jun\170619[Ridhima_TOMTIM]w and wo blocking protein\RAW\TOMTIM+\R_Gomkale_Linden_TOMTIM+_A11.raw;	0	Intra	6,M(Oxidation[M]);	3.6e-06	KTGETMEHIATK(1)-GSTIVGKTLK(7):0	Tim44_YEAST	Tim44_YEAST	sp|P14|Tim44_YEAST	sp|P14|Tim44_YEAST	sp|P14|Tim44_YEAST(111)-sp|P14|Tim44_YEAST(107)	8	111	107	3675	5.44	2320;	File: "Z:\alinden\DATA\2017\06_Jun\170619[Ridhima_TOMTIM]w and wo blocking protein\RAW\TOMTIM+\R_Gomkale_Linden_TOMTIM+_A11.raw"; ID: "2320"; scans: "3675"	-0.67137
yes	DSS	128	1128	2501.34	-0.00018	0	R	Z:\alinden\DATA\2017\06_Jun\170619[Ridhima_TOMTIM]w and wo blocking protein\RAW\TOMTIM+\R_Gomkale_Linden_TOMTIM+_A11.raw;	0	Intra	6,M(Oxidation[M]);	1.51e-05	KTGETMEHIATK(1)-GSTIVGKTLK(7):0	Tim44_YEAST	Tim44_YEAST	sp|P14|Tim44_YEAST	sp|P14|Tim44_YEAST	sp|P14|Tim44_YEAST(111)-sp|P14|Tim44_YEAST(107)	8	111	107	3688	4.82	2332;	File: "Z:\alinden\DATA\2017\06_Jun\170619[Ridhima_TOMTIM]w and wo blocking protein\RAW\TOMTIM+\R_Gomkale_Linden_TOMTIM+_A11.raw"; ID: "2332"; scans: "3688"	-0.071932
yes	DSS	281	1281	1845.02	0.00032	0	R	Z:\alinden\DATA\2017\06_Jun\170619[Ridhima_TOMTIM]w and wo blocking protein\RAW\TOMTIM+\R_Gomkale_Linden_TOMTIM+_A13.raw;	0	Intra	null	1.26e-07	KTQIDKLDK(1)-WMKR(3):0	PI_YEAST	PI_YEAST	sp|P1|PI_YEAST	sp|P1|PI_YEAST	sp|P1|PI_YEAST(97)-sp|P1|PI_YEAST(94)	3	97	94	4375	6.9	2980;	File: "Z:\alinden\DATA\2017\06_Jun\170619[Ridhima_TOMTIM]w and wo blocking protein\RAW\TOMTIM+\R_Gomkale_Linden_TOMTIM+_A13.raw"; ID: "2980"; scans: "4375"	0.173345
yes	DSS	266	1266	1989.11	0.00015	0	R	Z:\alinden\DATA\2017\06_Jun\170619[Ridhima_TOMTIM]w and wo blocking protein\RAW\TOMTIM+\R_Gomkale_Linden_TOMTIM+_A13.raw;	0	Intra	11,M(Oxidation[M]);	1.41e-07	KTQIDKLDK(1)-WMKRK(3):0	PI_YEAST	PI_YEAST	sp|P1|PI_YEAST	sp|P1|PI_YEAST	sp|P1|PI_YEAST(97)-sp|P1|PI_YEAST(94)	3	97	94	3039	6.85	1728;	File: "Z:\alinden\DATA\2017\06_Jun\170619[Ridhima_TOMTIM]w and wo blocking protein\RAW\TOMTIM+\R_Gomkale_Linden_TOMTIM+_A13.raw"; ID: "1728"; scans: "3039"	0.075373
yes	DSS	1	1,1	3517.97	3.98523	0	G	Z:\alinden\DATA\2017\06_Jun\170619[Ridhima_TOMTIM]w and wo blocking protein\RAW\TOMTIM+\R_Gomkale_Linden_TOMTIM+_A10.raw;	1	Inter	null	0.000266	LDKIFTPINLNQSHWALGIIDLK(3)-MLSILR(1):0	PI_YEAST	Tim50_YEAST	sp|P1|PI_YEAST	sp|P12|Tim50_YEAST	sp|P1|PI_YEAST(105)-sp|P12|Tim50_YEAST(1)	1	105	1	12671	3.58	10675;	File: "Z:\alinden\DATA\2017\06_Jun\170619[Ridhima_TOMTIM]w and wo blocking protein\RAW\TOMTIM+\R_Gomkale_Linden_TOMTIM+_A10.raw"; ID: "10675"; scans: "12671"	1131.21
yes	DSS	409	1409	4393.48	-0.03826	0	R	Z:\alinden\DATA\2017\06_Jun\170619[Ridhima_TOMTIM]w and wo blocking protein\RAW\TOMTIM+\R_Gomkale_Linden_TOMTIM+_A9.raw;	1	Inter	null	0.359	LDKIFTPINLNQSHWALGIIDLKK(3)-EINHLDEKLLKK(8):0	PI_YEAST	Mdj2_YEAST	sp|P1|PI_YEAST	sp|P19|Mdj2_YEAST	sp|P1|PI_YEAST(105)-sp|P19|Mdj2_YEAST(103)	1	105	103	11415	0.44	8787;	File: "Z:\alinden\DATA\2017\06_Jun\170619[Ridhima_TOMTIM]w and wo blocking protein\RAW\TOMTIM+\R_Gomkale_Linden_TOMTIM+_A9.raw"; ID: "8787"; scans: "11415"	-8.70644
yes	DSS	210	1210	2139.12	0.0023	0	G	Z:\alinden\DATA\2017\06_Jun\170619[Ridhima_TOMTIM]w and wo blocking protein\RAW\TOMTIM+\R_Gomkale_Linden_TOMTIM+_A12.raw;	0	Intra	null	6.55e-11	LGESEAYKK(8)-EAYLKAQR(5):0	Tim44_YEAST	Tim44_YEAST	sp|P14|Tim44_YEAST	sp|P14|Tim44_YEAST	sp|P14|Tim44_YEAST(89)-sp|P14|Tim44_YEAST(97)	3	89	97	4445	10.18	3029;	File: "Z:\alinden\DATA\2017\06_Jun\170619[Ridhima_TOMTIM]w and wo blocking protein\RAW\TOMTIM+\R_Gomkale_Linden_TOMTIM+_A12.raw"; ID: "3029"; scans: "4445"	1.0747
yes	DSS	284	1284	2139.12	0.00359	0	G	Z:\alinden\DATA\2017\06_Jun\170619[Ridhima_TOMTIM]w and wo blocking protein\RAW\TOMTIM+\R_Gomkale_Linden_TOMTIM+_A13.raw;	0	Intra	null	6.8e-10	LGESEAYKK(8)-EAYLKAQR(5):0	Tim44_YEAST	Tim44_YEAST	sp|P14|Tim44_YEAST	sp|P14|Tim44_YEAST	sp|P14|Tim44_YEAST(89)-sp|P14|Tim44_YEAST(97)	3	89	97	4662	9.17	3249;	File: "Z:\alinden\DATA\2017\06_Jun\170619[Ridhima_TOMTIM]w and wo blocking protein\RAW\TOMTIM+\R_Gomkale_Linden_TOMTIM+_A13.raw"; ID: "3249"; scans: "4662"	1.67747
yes	DSS	211	1211	2139.12	0.00218	0	R	Z:\alinden\DATA\2017\06_Jun\170619[Ridhima_TOMTIM]w and wo blocking protein\RAW\TOMTIM+\R_Gomkale_Linden_TOMTIM+_A12.raw;	0	Intra	null	1.4e-07	LGESEAYKK(8)-EAYLKAQR(5):0	Tim44_YEAST	Tim44_YEAST	sp|P14|Tim44_YEAST	sp|P14|Tim44_YEAST	sp|P14|Tim44_YEAST(89)-sp|P14|Tim44_YEAST(97)	3	89	97	4476	6.85	3058;	File: "Z:\alinden\DATA\2017\06_Jun\170619[Ridhima_TOMTIM]w and wo blocking protein\RAW\TOMTIM+\R_Gomkale_Linden_TOMTIM+_A12.raw"; ID: "3058"; scans: "4476"	1.01863
yes	DSS	149	1149	2506.4	0.00139	0	R	Z:\alinden\DATA\2017\06_Jun\170619[Ridhima_TOMTIM]w and wo blocking protein\RAW\TOMTIM+\R_Gomkale_Linden_TOMTIM+_A11.raw;	0	Intra	null	1.39e-05	LHPVSNSKGFLGIR(8)-KLDKEGR(4):0	Tim21_YEAST	Tim21_YEAST	sp|P13|Tim21_YEAST	sp|P13|Tim21_YEAST	sp|P13|Tim21_YEAST(227)-sp|P13|Tim21_YEAST(164)	1	227	164	6394	4.86	4885;	File: "Z:\alinden\DATA\2017\06_Jun\170619[Ridhima_TOMTIM]w and wo blocking protein\RAW\TOMTIM+\R_Gomkale_Linden_TOMTIM+_A11.raw"; ID: "4885"; scans: "6394"	0.554357
yes	DSS	352	1352	6142.22	2.05246	0	Y	Z:\alinden\DATA\2017\06_Jun\170619[Ridhima_TOMTIM]w and wo blocking protein\RAW\TOMTIM+\R_Gomkale_Linden_TOMTIM+_A8b.raw;	1	Inter	43,M(Oxidation[M]);	0.0565	LIPFLEYLATQQTKDVRPILNSFEDK(14)-KKTIGYVDSLSNGPNAMSFAILTDLQK(1):0	Tim50_YEAST	PI_YEAST	sp|P12|Tim50_YEAST	sp|P1|PI_YEAST	sp|P12|Tim50_YEAST(336)-sp|P1|PI_YEAST(126)	1	336	126	12648	1.25	8424;	File: "Z:\alinden\DATA\2017\06_Jun\170619[Ridhima_TOMTIM]w and wo blocking protein\RAW\TOMTIM+\R_Gomkale_Linden_TOMTIM+_A8b.raw"; ID: "8424"; scans: "12648"	333.99
yes	DSS	151	1151	2946.6	1.00345	0	R	Z:\alinden\DATA\2017\06_Jun\170619[Ridhima_TOMTIM]w and wo blocking protein\RAW\TOMTIM+\R_Gomkale_Linden_TOMTIM+_A11.raw;	0	Intra	null	0.000609	LKAYGELITNDKWTR(2)-FHVESKKK(7):0	Tim21_YEAST	Tim21_YEAST	sp|P13|Tim21_YEAST	sp|P13|Tim21_YEAST	sp|P13|Tim21_YEAST(139)-sp|P13|Tim21_YEAST(180)	1	139	180	6563	3.22	5045;	File: "Z:\alinden\DATA\2017\06_Jun\170619[Ridhima_TOMTIM]w and wo blocking protein\RAW\TOMTIM+\R_Gomkale_Linden_TOMTIM+_A11.raw"; ID: "5045"; scans: "6563"	340.313
yes	DSS	203	1203	2796.49	-0.01733	0	G	Z:\alinden\DATA\2017\06_Jun\170619[Ridhima_TOMTIM]w and wo blocking protein\RAW\TOMTIM+\R_Gomkale_Linden_TOMTIM+_A12.raw;	0	Intra	null	3.69e-05	LTVELKYWYNLAK(6)-AFKDWAPGK(3):0	Jac1_YEAST	Jac1_YEAST	sp|P2|Jac1_YEAST	sp|P2|Jac1_YEAST	sp|P2|Jac1_YEAST(162)-sp|P2|Jac1_YEAST(172)	2	162	172	24964	4.43	22275;	File: "Z:\alinden\DATA\2017\06_Jun\170619[Ridhima_TOMTIM]w and wo blocking protein\RAW\TOMTIM+\R_Gomkale_Linden_TOMTIM+_A12.raw"; ID: "22275"; scans: "24964"	-6.19486
yes	DSS	117	1117	2796.49	-0.00833	0	R	Z:\alinden\DATA\2017\06_Jun\170619[Ridhima_TOMTIM]w and wo blocking protein\RAW\TOMTIM+\R_Gomkale_Linden_TOMTIM+_A11.raw;	0	Intra	null	0.000769	LTVELKYWYNLAK(6)-AFKDWAPGK(3):0	Jac1_YEAST	Jac1_YEAST	sp|P2|Jac1_YEAST	sp|P2|Jac1_YEAST	sp|P2|Jac1_YEAST(162)-sp|P2|Jac1_YEAST(172)	2	162	172	23997	3.11	21479;	File: "Z:\alinden\DATA\2017\06_Jun\170619[Ridhima_TOMTIM]w and wo blocking protein\RAW\TOMTIM+\R_Gomkale_Linden_TOMTIM+_A11.raw"; ID: "21479"; scans: "23997"	-2.97767
yes	DSS	254	1254	1854.06	0.00114	0	R	Z:\alinden\DATA\2017\06_Jun\170619[Ridhima_TOMTIM]w and wo blocking protein\RAW\TOMTIM+\R_Gomkale_Linden_TOMTIM+_A12.raw;	1	Inter	null	0.00395	MPKVVETVK(3)-QKNGIK(2):0	Hsp70Ssc1_YEAST	Jac1_YEAST	sp|P15|Hsp70Ssc1_YEAST	sp|P2|Jac1_YEAST	sp|P15|Hsp70Ssc1_YEAST(371)-sp|P2|Jac1_YEAST(343)	1	371	343	9634	2.4	7903;	File: "Z:\alinden\DATA\2017\06_Jun\170619[Ridhima_TOMTIM]w and wo blocking protein\RAW\TOMTIM+\R_Gomkale_Linden_TOMTIM+_A12.raw"; ID: "7903"; scans: "9634"	0.614531
yes	DSS	328	1328	5558.84	1.03059	0	R	Z:\alinden\DATA\2017\06_Jun\170619[Ridhima_TOMTIM]w and wo blocking protein\RAW\TOMTIM+\R_Gomkale_Linden_TOMTIM+_A8.raw;	1	Inter	1,M(Oxidation[M]);	0.486	MSWLFGDKTPTDDANAAVGGQDTTKPK(8)-TLSPLTIAKLNNIRIENPTAGYR(9):0	Tim23_YEAST	Mdj2_YEAST	sp|P9|Tim23_YEAST	sp|P19|Mdj2_YEAST	sp|P9|Tim23_YEAST(8)-sp|P19|Mdj2_YEAST(38)	1	8	38	11843	0.31	7669;	File: "Z:\alinden\DATA\2017\06_Jun\170619[Ridhima_TOMTIM]w and wo blocking protein\RAW\TOMTIM+\R_Gomkale_Linden_TOMTIM+_A8.raw"; ID: "7669"; scans: "11843"	185.329
yes	DSS	230	1230	1976.11	0.00127	0	Y	Z:\alinden\DATA\2017\06_Jun\170619[Ridhima_TOMTIM]w and wo blocking protein\RAW\TOMTIM+\R_Gomkale_Linden_TOMTIM+_A12.raw;	0	Intra	null	0.000572	NKPKPLWPQVK(2)-KDDK(1):0	Tim21_YEAST	Tim21_YEAST	sp|P13|Tim21_YEAST	sp|P13|Tim21_YEAST	sp|P13|Tim21_YEAST(60)-sp|P13|Tim21_YEAST(53)	3	60	53	5339	3.24	3868;	File: "Z:\alinden\DATA\2017\06_Jun\170619[Ridhima_TOMTIM]w and wo blocking protein\RAW\TOMTIM+\R_Gomkale_Linden_TOMTIM+_A12.raw"; ID: "3868"; scans: "5339"	0.642349
yes	DSS	291	1291	1976.11	0.00055	0	G	Z:\alinden\DATA\2017\06_Jun\170619[Ridhima_TOMTIM]w and wo blocking protein\RAW\TOMTIM+\R_Gomkale_Linden_TOMTIM+_A13.raw;	0	Intra	null	0.000953	NKPKPLWPQVK(2)-KDDK(1):0	Tim21_YEAST	Tim21_YEAST	sp|P13|Tim21_YEAST	sp|P13|Tim21_YEAST	sp|P13|Tim21_YEAST(60)-sp|P13|Tim21_YEAST(53)	3	60	53	5528	3.02	4043;	File: "Z:\alinden\DATA\2017\06_Jun\170619[Ridhima_TOMTIM]w and wo blocking protein\RAW\TOMTIM+\R_Gomkale_Linden_TOMTIM+_A13.raw"; ID: "4043"; scans: "5528"	0.278183
yes	DSS	212	1212	2233.26	0.00056	0	R	Z:\alinden\DATA\2017\06_Jun\170619[Ridhima_TOMTIM]w and wo blocking protein\RAW\TOMTIM+\R_Gomkale_Linden_TOMTIM+_A12.raw;	0	Intra	null	1.31e-06	NKPKPLWPQVK(2)-KDDKTR(1):0	Tim21_YEAST	Tim21_YEAST	sp|P13|Tim21_YEAST	sp|P13|Tim21_YEAST	sp|P13|Tim21_YEAST(60)-sp|P13|Tim21_YEAST(53)	3	60	53	4554	5.88	3131;	File: "Z:\alinden\DATA\2017\06_Jun\170619[Ridhima_TOMTIM]w and wo blocking protein\RAW\TOMTIM+\R_Gomkale_Linden_TOMTIM+_A12.raw"; ID: "3131"; scans: "4554"	0.250642
yes	DSS	219	1219	2233.26	-0.0004	0	R	Z:\alinden\DATA\2017\06_Jun\170619[Ridhima_TOMTIM]w and wo blocking protein\RAW\TOMTIM+\R_Gomkale_Linden_TOMTIM+_A12.raw;	0	Intra	null	0.00012	NKPKPLWPQVK(2)-KDDKTR(4):0	Tim21_YEAST	Tim21_YEAST	sp|P13|Tim21_YEAST	sp|P13|Tim21_YEAST	sp|P13|Tim21_YEAST(60)-sp|P13|Tim21_YEAST(56)	1	60	56	4829	3.92	3389;	File: "Z:\alinden\DATA\2017\06_Jun\170619[Ridhima_TOMTIM]w and wo blocking protein\RAW\TOMTIM+\R_Gomkale_Linden_TOMTIM+_A12.raw"; ID: "3389"; scans: "4829"	-0.17903
yes	DSS	265	1265	1896.08	0.00027	0	R	Z:\alinden\DATA\2017\06_Jun\170619[Ridhima_TOMTIM]w and wo blocking protein\RAW\TOMTIM+\R_Gomkale_Linden_TOMTIM+_A13.raw;	0	Intra	null	1.38e-05	NRPIVSTKK(8)-LDKEGR(3):0	Tim21_YEAST	Tim21_YEAST	sp|P13|Tim21_YEAST	sp|P13|Tim21_YEAST	sp|P13|Tim21_YEAST(160)-sp|P13|Tim21_YEAST(164)	1	160	164	2934	4.86	1630;	File: "Z:\alinden\DATA\2017\06_Jun\170619[Ridhima_TOMTIM]w and wo blocking protein\RAW\TOMTIM+\R_Gomkale_Linden_TOMTIM+_A13.raw"; ID: "1630"; scans: "2934"	0.142323
yes	DSS	236	1236	2404.27	0.00298	0	Y	Z:\alinden\DATA\2017\06_Jun\170619[Ridhima_TOMTIM]w and wo blocking protein\RAW\TOMTIM+\R_Gomkale_Linden_TOMTIM+_A12.raw;	0	Intra	null	4.04e-10	QKEVDALFEEEKK(12)-KIAESK(1):0	Tim50_YEAST	Tim50_YEAST	sp|P12|Tim50_YEAST	sp|P12|Tim50_YEAST	sp|P12|Tim50_YEAST(467)-sp|P12|Tim50_YEAST(471)	3	467	471	5768	9.39	4271;	File: "Z:\alinden\DATA\2017\06_Jun\170619[Ridhima_TOMTIM]w and wo blocking protein\RAW\TOMTIM+\R_Gomkale_Linden_TOMTIM+_A12.raw"; ID: "4271"; scans: "5768"	1.23894
yes	DSS	292	1292	2404.27	0.00187	0	Y	Z:\alinden\DATA\2017\06_Jun\170619[Ridhima_TOMTIM]w and wo blocking protein\RAW\TOMTIM+\R_Gomkale_Linden_TOMTIM+_A13.raw;	0	Intra	null	4.36e-09	QKEVDALFEEEKK(12)-KIAESK(1):0	Tim50_YEAST	Tim50_YEAST	sp|P12|Tim50_YEAST	sp|P12|Tim50_YEAST	sp|P12|Tim50_YEAST(467)-sp|P12|Tim50_YEAST(471)	3	467	471	5901	8.36	4394;	File: "Z:\alinden\DATA\2017\06_Jun\170619[Ridhima_TOMTIM]w and wo blocking protein\RAW\TOMTIM+\R_Gomkale_Linden_TOMTIM+_A13.raw"; ID: "4394"; scans: "5901"	0.777455
yes	DSS	235	1235	2404.27	0.00246	0	G	Z:\alinden\DATA\2017\06_Jun\170619[Ridhima_TOMTIM]w and wo blocking protein\RAW\TOMTIM+\R_Gomkale_Linden_TOMTIM+_A12.raw;	0	Intra	null	4.49e-08	QKEVDALFEEEKK(12)-KIAESK(1):0	Tim50_YEAST	Tim50_YEAST	sp|P12|Tim50_YEAST	sp|P12|Tim50_YEAST	sp|P12|Tim50_YEAST(467)-sp|P12|Tim50_YEAST(471)	3	467	471	5704	7.35	4211;	File: "Z:\alinden\DATA\2017\06_Jun\170619[Ridhima_TOMTIM]w and wo blocking protein\RAW\TOMTIM+\R_Gomkale_Linden_TOMTIM+_A12.raw"; ID: "4211"; scans: "5704"	1.02275
yes	DSS	143	1143	2405.42	1.0253	0	R	Z:\alinden\DATA\2017\06_Jun\170619[Ridhima_TOMTIM]w and wo blocking protein\RAW\TOMTIM+\R_Gomkale_Linden_TOMTIM+_A11.raw;	1	Inter	null	0.23	QKNGIKANFK(6)-KIALVHLEAK(1):0	Jac1_YEAST	Tim21_YEAST	sp|P2|Jac1_YEAST	sp|P13|Tim21_YEAST	sp|P2|Jac1_YEAST(347)-sp|P13|Tim21_YEAST(181)	1	347	181	5320	0.64	3872;	File: "Z:\alinden\DATA\2017\06_Jun\170619[Ridhima_TOMTIM]w and wo blocking protein\RAW\TOMTIM+\R_Gomkale_Linden_TOMTIM+_A11.raw"; ID: "3872"; scans: "5320"	425.887
yes	DSS	406	1406	5045.52	3.03365	0	R	Z:\alinden\DATA\2017\06_Jun\170619[Ridhima_TOMTIM]w and wo blocking protein\RAW\TOMTIM+\R_Gomkale_Linden_TOMTIM+_A9.raw;	0	Intra	null	0.00242	QLQAQHHPDMAQQGSEQSSTLNQAYHTLKDPLR(29)-SQYMLKLLR(6):0	Jac1_YEAST	Jac1_YEAST	sp|P2|Jac1_YEAST	sp|P2|Jac1_YEAST	sp|P2|Jac1_YEAST(70)-sp|P2|Jac1_YEAST(81)	1	70	81	7951	2.62	5549;	File: "Z:\alinden\DATA\2017\06_Jun\170619[Ridhima_TOMTIM]w and wo blocking protein\RAW\TOMTIM+\R_Gomkale_Linden_TOMTIM+_A9.raw"; ID: "5549"; scans: "7951"	600.775
yes	DSS	29	1,29	4645.28	4.01358	0	G	Z:\alinden\DATA\2017\06_Jun\170619[Ridhima_TOMTIM]w and wo blocking protein\RAW\TOMTIM+\R_Gomkale_Linden_TOMTIM+_A10.raw;	0	Intra	null	0.00025	QLQAQHHPDMAQQGSEQSSTLNQAYHTLKDPLRR(29)-KEYR(1):0	Jac1_YEAST	Jac1_YEAST	sp|P2|Jac1_YEAST	sp|P2|Jac1_YEAST	sp|P2|Jac1_YEAST(70)-sp|P2|Jac1_YEAST(38)	24	70	38	6346	3.6	4720;	File: "Z:\alinden\DATA\2017\06_Jun\170619[Ridhima_TOMTIM]w and wo blocking protein\RAW\TOMTIM+\R_Gomkale_Linden_TOMTIM+_A10.raw"; ID: "4720"; scans: "6346"	863.079
yes	DSS	72	1,72	4661.28	2.00369	0	G	Z:\alinden\DATA\2017\06_Jun\170619[Ridhima_TOMTIM]w and wo blocking protein\RAW\TOMTIM+\R_Gomkale_Linden_TOMTIM+_A10b.raw;	0	Intra	10,M(Oxidation[M]);	0.00025	QLQAQHHPDMAQQGSEQSSTLNQAYHTLKDPLRR(29)-KEYR(1):0	Jac1_YEAST	Jac1_YEAST	sp|P2|Jac1_YEAST	sp|P2|Jac1_YEAST	sp|P2|Jac1_YEAST(70)-sp|P2|Jac1_YEAST(38)	24	70	38	6728	3.6	5400;	File: "Z:\alinden\DATA\2017\06_Jun\170619[Ridhima_TOMTIM]w and wo blocking protein\RAW\TOMTIM+\R_Gomkale_Linden_TOMTIM+_A10b.raw"; ID: "5400"; scans: "6728"	429.581
yes	DSS	74	1,74	4645.28	0.00216	0	G	Z:\alinden\DATA\2017\06_Jun\170619[Ridhima_TOMTIM]w and wo blocking protein\RAW\TOMTIM+\R_Gomkale_Linden_TOMTIM+_A10b.raw;	0	Intra	null	0.000326	QLQAQHHPDMAQQGSEQSSTLNQAYHTLKDPLRR(29)-KEYR(1):0	Jac1_YEAST	Jac1_YEAST	sp|P2|Jac1_YEAST	sp|P2|Jac1_YEAST	sp|P2|Jac1_YEAST(70)-sp|P2|Jac1_YEAST(38)	24	70	38	7083	3.49	5733;	File: "Z:\alinden\DATA\2017\06_Jun\170619[Ridhima_TOMTIM]w and wo blocking protein\RAW\TOMTIM+\R_Gomkale_Linden_TOMTIM+_A10b.raw"; ID: "5733"; scans: "7083"	0.464887
yes	DSS	76	1,76	4645.28	2.00808	0	G	Z:\alinden\DATA\2017\06_Jun\170619[Ridhima_TOMTIM]w and wo blocking protein\RAW\TOMTIM+\R_Gomkale_Linden_TOMTIM+_A10b.raw;	0	Intra	null	0.000345	QLQAQHHPDMAQQGSEQSSTLNQAYHTLKDPLRR(29)-KEYR(1):0	Jac1_YEAST	Jac1_YEAST	sp|P2|Jac1_YEAST	sp|P2|Jac1_YEAST	sp|P2|Jac1_YEAST(70)-sp|P2|Jac1_YEAST(38)	24	70	38	7203	3.46	5846;	File: "Z:\alinden\DATA\2017\06_Jun\170619[Ridhima_TOMTIM]w and wo blocking protein\RAW\TOMTIM+\R_Gomkale_Linden_TOMTIM+_A10b.raw"; ID: "5846"; scans: "7203"	432.003
yes	DSS	455	1455	4645.28	2.00851	0	G	Z:\alinden\DATA\2017\06_Jun\170619[Ridhima_TOMTIM]w and wo blocking protein\RAW\TOMTIM+\R_Gomkale_Linden_TOMTIM+_A9b.raw;	0	Intra	null	0.000366	QLQAQHHPDMAQQGSEQSSTLNQAYHTLKDPLRR(29)-KEYR(1):0	Jac1_YEAST	Jac1_YEAST	sp|P2|Jac1_YEAST	sp|P2|Jac1_YEAST	sp|P2|Jac1_YEAST(70)-sp|P2|Jac1_YEAST(38)	24	70	38	4773	3.44	2414;	File: "Z:\alinden\DATA\2017\06_Jun\170619[Ridhima_TOMTIM]w and wo blocking protein\RAW\TOMTIM+\R_Gomkale_Linden_TOMTIM+_A9b.raw"; ID: "2414"; scans: "4773"	432.096
yes	DSS	31	1,31	4645.28	2.00682	0	G	Z:\alinden\DATA\2017\06_Jun\170619[Ridhima_TOMTIM]w and wo blocking protein\RAW\TOMTIM+\R_Gomkale_Linden_TOMTIM+_A10.raw;	0	Intra	null	0.000439	QLQAQHHPDMAQQGSEQSSTLNQAYHTLKDPLRR(29)-KEYR(1):0	Jac1_YEAST	Jac1_YEAST	sp|P2|Jac1_YEAST	sp|P2|Jac1_YEAST	sp|P2|Jac1_YEAST(70)-sp|P2|Jac1_YEAST(38)	24	70	38	6360	3.36	4733;	File: "Z:\alinden\DATA\2017\06_Jun\170619[Ridhima_TOMTIM]w and wo blocking protein\RAW\TOMTIM+\R_Gomkale_Linden_TOMTIM+_A10.raw"; ID: "4733"; scans: "6360"	431.732
yes	DSS	75	1,75	4645.28	4.01243	0	G	Z:\alinden\DATA\2017\06_Jun\170619[Ridhima_TOMTIM]w and wo blocking protein\RAW\TOMTIM+\R_Gomkale_Linden_TOMTIM+_A10b.raw;	0	Intra	null	0.000482	QLQAQHHPDMAQQGSEQSSTLNQAYHTLKDPLRR(29)-KEYR(1):0	Jac1_YEAST	Jac1_YEAST	sp|P2|Jac1_YEAST	sp|P2|Jac1_YEAST	sp|P2|Jac1_YEAST(70)-sp|P2|Jac1_YEAST(38)	24	70	38	7120	3.32	5768;	File: "Z:\alinden\DATA\2017\06_Jun\170619[Ridhima_TOMTIM]w and wo blocking protein\RAW\TOMTIM+\R_Gomkale_Linden_TOMTIM+_A10b.raw"; ID: "5768"; scans: "7120"	862.832
yes	DSS	155	1155	4645.28	-0.00337	0	G	Z:\alinden\DATA\2017\06_Jun\170619[Ridhima_TOMTIM]w and wo blocking protein\RAW\TOMTIM+\R_Gomkale_Linden_TOMTIM+_A11.raw;	0	Intra	null	0.000592	QLQAQHHPDMAQQGSEQSSTLNQAYHTLKDPLRR(29)-KEYR(1):0	Jac1_YEAST	Jac1_YEAST	sp|P2|Jac1_YEAST	sp|P2|Jac1_YEAST	sp|P2|Jac1_YEAST(70)-sp|P2|Jac1_YEAST(38)	24	70	38	7025	3.23	5481;	File: "Z:\alinden\DATA\2017\06_Jun\170619[Ridhima_TOMTIM]w and wo blocking protein\RAW\TOMTIM+\R_Gomkale_Linden_TOMTIM+_A11.raw"; ID: "5481"; scans: "7025"	-0.72531
yes	DSS	77	1,77	4645.28	3.00908	0	G	Z:\alinden\DATA\2017\06_Jun\170619[Ridhima_TOMTIM]w and wo blocking protein\RAW\TOMTIM+\R_Gomkale_Linden_TOMTIM+_A10b.raw;	0	Intra	null	0.000818	QLQAQHHPDMAQQGSEQSSTLNQAYHTLKDPLRR(29)-KEYR(1):0	Jac1_YEAST	Jac1_YEAST	sp|P2|Jac1_YEAST	sp|P2|Jac1_YEAST	sp|P2|Jac1_YEAST(70)-sp|P2|Jac1_YEAST(38)	24	70	38	7223	3.09	5865;	File: "Z:\alinden\DATA\2017\06_Jun\170619[Ridhima_TOMTIM]w and wo blocking protein\RAW\TOMTIM+\R_Gomkale_Linden_TOMTIM+_A10b.raw"; ID: "5865"; scans: "7223"	647.211
yes	DSS	33	1,33	4645.28	1.00333	0	G	Z:\alinden\DATA\2017\06_Jun\170619[Ridhima_TOMTIM]w and wo blocking protein\RAW\TOMTIM+\R_Gomkale_Linden_TOMTIM+_A10.raw;	0	Intra	null	0.000834	QLQAQHHPDMAQQGSEQSSTLNQAYHTLKDPLRR(29)-KEYR(1):0	Jac1_YEAST	Jac1_YEAST	sp|P2|Jac1_YEAST	sp|P2|Jac1_YEAST	sp|P2|Jac1_YEAST(70)-sp|P2|Jac1_YEAST(38)	24	70	38	6473	3.08	4839;	File: "Z:\alinden\DATA\2017\06_Jun\170619[Ridhima_TOMTIM]w and wo blocking protein\RAW\TOMTIM+\R_Gomkale_Linden_TOMTIM+_A10.raw"; ID: "4839"; scans: "6473"	215.895
yes	DSS	396	1396	4645.28	3.01099	0	G	Z:\alinden\DATA\2017\06_Jun\170619[Ridhima_TOMTIM]w and wo blocking protein\RAW\TOMTIM+\R_Gomkale_Linden_TOMTIM+_A9.raw;	0	Intra	null	0.000903	QLQAQHHPDMAQQGSEQSSTLNQAYHTLKDPLRR(29)-KEYR(1):0	Jac1_YEAST	Jac1_YEAST	sp|P2|Jac1_YEAST	sp|P2|Jac1_YEAST	sp|P2|Jac1_YEAST(70)-sp|P2|Jac1_YEAST(38)	24	70	38	4990	3.04	2806;	File: "Z:\alinden\DATA\2017\06_Jun\170619[Ridhima_TOMTIM]w and wo blocking protein\RAW\TOMTIM+\R_Gomkale_Linden_TOMTIM+_A9.raw"; ID: "2806"; scans: "4990"	647.622
yes	DSS	30	1,30	4645.28	0.00355	0	G	Z:\alinden\DATA\2017\06_Jun\170619[Ridhima_TOMTIM]w and wo blocking protein\RAW\TOMTIM+\R_Gomkale_Linden_TOMTIM+_A10.raw;	0	Intra	null	0.000962	QLQAQHHPDMAQQGSEQSSTLNQAYHTLKDPLRR(29)-KEYR(1):0	Jac1_YEAST	Jac1_YEAST	sp|P2|Jac1_YEAST	sp|P2|Jac1_YEAST	sp|P2|Jac1_YEAST(70)-sp|P2|Jac1_YEAST(38)	24	70	38	6359	3.02	4732;	File: "Z:\alinden\DATA\2017\06_Jun\170619[Ridhima_TOMTIM]w and wo blocking protein\RAW\TOMTIM+\R_Gomkale_Linden_TOMTIM+_A10.raw"; ID: "4732"; scans: "6359"	0.76405
yes	DSS	32	1,32	4645.28	-0.00709	0	G	Z:\alinden\DATA\2017\06_Jun\170619[Ridhima_TOMTIM]w and wo blocking protein\RAW\TOMTIM+\R_Gomkale_Linden_TOMTIM+_A10.raw;	0	Intra	null	0.00104	QLQAQHHPDMAQQGSEQSSTLNQAYHTLKDPLRR(29)-KEYR(1):0	Jac1_YEAST	Jac1_YEAST	sp|P2|Jac1_YEAST	sp|P2|Jac1_YEAST	sp|P2|Jac1_YEAST(70)-sp|P2|Jac1_YEAST(38)	24	70	38	6388	2.98	4759;	File: "Z:\alinden\DATA\2017\06_Jun\170619[Ridhima_TOMTIM]w and wo blocking protein\RAW\TOMTIM+\R_Gomkale_Linden_TOMTIM+_A10.raw"; ID: "4759"; scans: "6388"	-1.52595
yes	DSS	34	1,34	4645.28	0.003	0	G	Z:\alinden\DATA\2017\06_Jun\170619[Ridhima_TOMTIM]w and wo blocking protein\RAW\TOMTIM+\R_Gomkale_Linden_TOMTIM+_A10.raw;	0	Intra	null	0.00124	QLQAQHHPDMAQQGSEQSSTLNQAYHTLKDPLRR(29)-KEYR(1):0	Jac1_YEAST	Jac1_YEAST	sp|P2|Jac1_YEAST	sp|P2|Jac1_YEAST	sp|P2|Jac1_YEAST(70)-sp|P2|Jac1_YEAST(38)	24	70	38	6474	2.91	4840;	File: "Z:\alinden\DATA\2017\06_Jun\170619[Ridhima_TOMTIM]w and wo blocking protein\RAW\TOMTIM+\R_Gomkale_Linden_TOMTIM+_A10.raw"; ID: "4840"; scans: "6474"	0.645676
yes	DSS	393	1393	4661.28	1.00136	0	Y	Z:\alinden\DATA\2017\06_Jun\170619[Ridhima_TOMTIM]w and wo blocking protein\RAW\TOMTIM+\R_Gomkale_Linden_TOMTIM+_A9.raw;	0	Intra	10,M(Oxidation[M]);	0.00192	QLQAQHHPDMAQQGSEQSSTLNQAYHTLKDPLRR(29)-KEYR(1):0	Jac1_YEAST	Jac1_YEAST	sp|P2|Jac1_YEAST	sp|P2|Jac1_YEAST	sp|P2|Jac1_YEAST(70)-sp|P2|Jac1_YEAST(38)	24	70	38	4896	2.72	2719;	File: "Z:\alinden\DATA\2017\06_Jun\170619[Ridhima_TOMTIM]w and wo blocking protein\RAW\TOMTIM+\R_Gomkale_Linden_TOMTIM+_A9.raw"; ID: "2719"; scans: "4896"	214.733
yes	DSS	395	1395	4645.28	3.01015	0	G	Z:\alinden\DATA\2017\06_Jun\170619[Ridhima_TOMTIM]w and wo blocking protein\RAW\TOMTIM+\R_Gomkale_Linden_TOMTIM+_A9.raw;	0	Intra	null	0.00294	QLQAQHHPDMAQQGSEQSSTLNQAYHTLKDPLRR(29)-KEYR(1):0	Jac1_YEAST	Jac1_YEAST	sp|P2|Jac1_YEAST	sp|P2|Jac1_YEAST	sp|P2|Jac1_YEAST(70)-sp|P2|Jac1_YEAST(38)	24	70	38	4934	2.53	2754;	File: "Z:\alinden\DATA\2017\06_Jun\170619[Ridhima_TOMTIM]w and wo blocking protein\RAW\TOMTIM+\R_Gomkale_Linden_TOMTIM+_A9.raw"; ID: "2754"; scans: "4934"	647.441
yes	DSS	447	1447	4661.28	0.00192	0	G	Z:\alinden\DATA\2017\06_Jun\170619[Ridhima_TOMTIM]w and wo blocking protein\RAW\TOMTIM+\R_Gomkale_Linden_TOMTIM+_A9b.raw;	0	Intra	10,M(Oxidation[M]);	0.0056	QLQAQHHPDMAQQGSEQSSTLNQAYHTLKDPLRR(29)-KEYR(1):0	Jac1_YEAST	Jac1_YEAST	sp|P2|Jac1_YEAST	sp|P2|Jac1_YEAST	sp|P2|Jac1_YEAST(70)-sp|P2|Jac1_YEAST(38)	24	70	38	4493	2.25	2166;	File: "Z:\alinden\DATA\2017\06_Jun\170619[Ridhima_TOMTIM]w and wo blocking protein\RAW\TOMTIM+\R_Gomkale_Linden_TOMTIM+_A9b.raw"; ID: "2166"; scans: "4493"	0.411815
yes	DSS	158	1158	4645.28	-0.00554	0	Y	Z:\alinden\DATA\2017\06_Jun\170619[Ridhima_TOMTIM]w and wo blocking protein\RAW\TOMTIM+\R_Gomkale_Linden_TOMTIM+_A11.raw;	0	Intra	null	0.00752	QLQAQHHPDMAQQGSEQSSTLNQAYHTLKDPLRR(29)-KEYR(1):0	Jac1_YEAST	Jac1_YEAST	sp|P2|Jac1_YEAST	sp|P2|Jac1_YEAST	sp|P2|Jac1_YEAST(70)-sp|P2|Jac1_YEAST(38)	24	70	38	7147	2.12	5596;	File: "Z:\alinden\DATA\2017\06_Jun\170619[Ridhima_TOMTIM]w and wo blocking protein\RAW\TOMTIM+\R_Gomkale_Linden_TOMTIM+_A11.raw"; ID: "5596"; scans: "7147"	-1.19235
yes	DSS	450	1450	4661.28	0.99625	0	Y	Z:\alinden\DATA\2017\06_Jun\170619[Ridhima_TOMTIM]w and wo blocking protein\RAW\TOMTIM+\R_Gomkale_Linden_TOMTIM+_A9b.raw;	0	Intra	10,M(Oxidation[M]);	0.00758	QLQAQHHPDMAQQGSEQSSTLNQAYHTLKDPLRR(29)-KEYR(1):0	Jac1_YEAST	Jac1_YEAST	sp|P2|Jac1_YEAST	sp|P2|Jac1_YEAST	sp|P2|Jac1_YEAST(70)-sp|P2|Jac1_YEAST(38)	24	70	38	4599	2.12	2261;	File: "Z:\alinden\DATA\2017\06_Jun\170619[Ridhima_TOMTIM]w and wo blocking protein\RAW\TOMTIM+\R_Gomkale_Linden_TOMTIM+_A9b.raw"; ID: "2261"; scans: "4599"	213.637
yes	DSS	40	1,40	4645.28	-0.02831	0	Y	Z:\alinden\DATA\2017\06_Jun\170619[Ridhima_TOMTIM]w and wo blocking protein\RAW\TOMTIM+\R_Gomkale_Linden_TOMTIM+_A10.raw;	0	Intra	null	0.00887	QLQAQHHPDMAQQGSEQSSTLNQAYHTLKDPLRR(29)-KEYR(1):0	Jac1_YEAST	Jac1_YEAST	sp|P2|Jac1_YEAST	sp|P2|Jac1_YEAST	sp|P2|Jac1_YEAST(70)-sp|P2|Jac1_YEAST(38)	24	70	38	7128	2.05	5455;	File: "Z:\alinden\DATA\2017\06_Jun\170619[Ridhima_TOMTIM]w and wo blocking protein\RAW\TOMTIM+\R_Gomkale_Linden_TOMTIM+_A10.raw"; ID: "5455"; scans: "7128"	-6.09307
yes	DSS	446	1446	4661.28	-0.01588	0	Y	Z:\alinden\DATA\2017\06_Jun\170619[Ridhima_TOMTIM]w and wo blocking protein\RAW\TOMTIM+\R_Gomkale_Linden_TOMTIM+_A9b.raw;	0	Intra	10,M(Oxidation[M]);	0.00905	QLQAQHHPDMAQQGSEQSSTLNQAYHTLKDPLRR(29)-KEYR(1):0	Jac1_YEAST	Jac1_YEAST	sp|P2|Jac1_YEAST	sp|P2|Jac1_YEAST	sp|P2|Jac1_YEAST(70)-sp|P2|Jac1_YEAST(38)	24	70	38	4449	2.04	2126;	File: "Z:\alinden\DATA\2017\06_Jun\170619[Ridhima_TOMTIM]w and wo blocking protein\RAW\TOMTIM+\R_Gomkale_Linden_TOMTIM+_A9b.raw"; ID: "2126"; scans: "4449"	-3.40607
yes	DSS	392	1392	4661.28	2.01308	0	Y	Z:\alinden\DATA\2017\06_Jun\170619[Ridhima_TOMTIM]w and wo blocking protein\RAW\TOMTIM+\R_Gomkale_Linden_TOMTIM+_A9.raw;	0	Intra	10,M(Oxidation[M]);	0.0116	QLQAQHHPDMAQQGSEQSSTLNQAYHTLKDPLRR(29)-KEYR(1):0	Jac1_YEAST	Jac1_YEAST	sp|P2|Jac1_YEAST	sp|P2|Jac1_YEAST	sp|P2|Jac1_YEAST(70)-sp|P2|Jac1_YEAST(38)	24	70	38	4816	1.94	2648;	File: "Z:\alinden\DATA\2017\06_Jun\170619[Ridhima_TOMTIM]w and wo blocking protein\RAW\TOMTIM+\R_Gomkale_Linden_TOMTIM+_A9.raw"; ID: "2648"; scans: "4816"	431.593
yes	DSS	386	1386	4661.28	3.00686	0	Y	Z:\alinden\DATA\2017\06_Jun\170619[Ridhima_TOMTIM]w and wo blocking protein\RAW\TOMTIM+\R_Gomkale_Linden_TOMTIM+_A9.raw;	0	Intra	10,M(Oxidation[M]);	0.0117	QLQAQHHPDMAQQGSEQSSTLNQAYHTLKDPLRR(29)-KEYR(1):0	Jac1_YEAST	Jac1_YEAST	sp|P2|Jac1_YEAST	sp|P2|Jac1_YEAST	sp|P2|Jac1_YEAST(70)-sp|P2|Jac1_YEAST(38)	24	70	38	4658	1.93	2503;	File: "Z:\alinden\DATA\2017\06_Jun\170619[Ridhima_TOMTIM]w and wo blocking protein\RAW\TOMTIM+\R_Gomkale_Linden_TOMTIM+_A9.raw"; ID: "2503"; scans: "4658"	644.517
yes	DSS	387	1387	4661.28	0.00536	0	R	Z:\alinden\DATA\2017\06_Jun\170619[Ridhima_TOMTIM]w and wo blocking protein\RAW\TOMTIM+\R_Gomkale_Linden_TOMTIM+_A9.raw;	0	Intra	10,M(Oxidation[M]);	0.0126	QLQAQHHPDMAQQGSEQSSTLNQAYHTLKDPLRR(29)-KEYR(1):0	Jac1_YEAST	Jac1_YEAST	sp|P2|Jac1_YEAST	sp|P2|Jac1_YEAST	sp|P2|Jac1_YEAST(70)-sp|P2|Jac1_YEAST(38)	24	70	38	4664	1.9	2508;	File: "Z:\alinden\DATA\2017\06_Jun\170619[Ridhima_TOMTIM]w and wo blocking protein\RAW\TOMTIM+\R_Gomkale_Linden_TOMTIM+_A9.raw"; ID: "2508"; scans: "4664"	1.14965
yes	DSS	104	1104	3128.71	1.00768	0	R	Z:\alinden\DATA\2017\06_Jun\170619[Ridhima_TOMTIM]w and wo blocking protein\RAW\TOMTIM+\R_Gomkale_Linden_TOMTIM+_A11.raw;	0	Intra	null	0.0024	RWLNSGIISFFMKYIEK(13)-KKTQIDK(2):0	PI_YEAST	PI_YEAST	sp|P1|PI_YEAST	sp|P1|PI_YEAST	sp|P1|PI_YEAST(61)-sp|P1|PI_YEAST(97)	19	61	97	20555	2.62	18235;	File: "Z:\alinden\DATA\2017\06_Jun\170619[Ridhima_TOMTIM]w and wo blocking protein\RAW\TOMTIM+\R_Gomkale_Linden_TOMTIM+_A11.raw"; ID: "18235"; scans: "20555"	321.868
yes	DSS	61	1,61	3356.82	-0.01517	0	G	Z:\alinden\DATA\2017\06_Jun\170619[Ridhima_TOMTIM]w and wo blocking protein\RAW\TOMTIM+\R_Gomkale_Linden_TOMTIM+_A10b.raw;	0	Intra	null	1.16e-19	RWLNSGIISFFMKYIEK(13)-KTQIDKLDK(1):0	PI_YEAST	PI_YEAST	sp|P1|PI_YEAST	sp|P1|PI_YEAST	sp|P1|PI_YEAST(61)-sp|P1|PI_YEAST(97)	19	61	97	19991	18.94	17875;	File: "Z:\alinden\DATA\2017\06_Jun\170619[Ridhima_TOMTIM]w and wo blocking protein\RAW\TOMTIM+\R_Gomkale_Linden_TOMTIM+_A10b.raw"; ID: "17875"; scans: "19991"	-4.51782
yes	DSS	62	1,62	3356.82	-0.00712	0	G	Z:\alinden\DATA\2017\06_Jun\170619[Ridhima_TOMTIM]w and wo blocking protein\RAW\TOMTIM+\R_Gomkale_Linden_TOMTIM+_A10b.raw;	0	Intra	null	5.82e-19	RWLNSGIISFFMKYIEK(13)-KTQIDKLDK(1):0	PI_YEAST	PI_YEAST	sp|P1|PI_YEAST	sp|P1|PI_YEAST	sp|P1|PI_YEAST(61)-sp|P1|PI_YEAST(97)	19	61	97	20003	18.24	17886;	File: "Z:\alinden\DATA\2017\06_Jun\170619[Ridhima_TOMTIM]w and wo blocking protein\RAW\TOMTIM+\R_Gomkale_Linden_TOMTIM+_A10b.raw"; ID: "17886"; scans: "20003"	-2.12042
yes	DSS	191	1191	3356.82	2.00924	0	G	Z:\alinden\DATA\2017\06_Jun\170619[Ridhima_TOMTIM]w and wo blocking protein\RAW\TOMTIM+\R_Gomkale_Linden_TOMTIM+_A12.raw;	0	Intra	null	1.75e-18	RWLNSGIISFFMKYIEK(13)-KTQIDKLDK(1):0	PI_YEAST	PI_YEAST	sp|P1|PI_YEAST	sp|P1|PI_YEAST	sp|P1|PI_YEAST(61)-sp|P1|PI_YEAST(97)	19	61	97	22250	17.76	19736;	File: "Z:\alinden\DATA\2017\06_Jun\170619[Ridhima_TOMTIM]w and wo blocking protein\RAW\TOMTIM+\R_Gomkale_Linden_TOMTIM+_A12.raw"; ID: "19736"; scans: "22250"	598.017
yes	DSS	14	1,14	3356.82	-0.01248	0	G	Z:\alinden\DATA\2017\06_Jun\170619[Ridhima_TOMTIM]w and wo blocking protein\RAW\TOMTIM+\R_Gomkale_Linden_TOMTIM+_A10.raw;	0	Intra	null	2.67e-15	RWLNSGIISFFMKYIEK(13)-KTQIDKLDK(1):0	PI_YEAST	PI_YEAST	sp|P1|PI_YEAST	sp|P1|PI_YEAST	sp|P1|PI_YEAST(61)-sp|P1|PI_YEAST(97)	19	61	97	19462	14.57	17066;	File: "Z:\alinden\DATA\2017\06_Jun\170619[Ridhima_TOMTIM]w and wo blocking protein\RAW\TOMTIM+\R_Gomkale_Linden_TOMTIM+_A10.raw"; ID: "17066"; scans: "19462"	-3.7167
yes	DSS	110	1110	3356.82	0.00288	0	G	Z:\alinden\DATA\2017\06_Jun\170619[Ridhima_TOMTIM]w and wo blocking protein\RAW\TOMTIM+\R_Gomkale_Linden_TOMTIM+_A11.raw;	0	Intra	null	2.79e-15	RWLNSGIISFFMKYIEK(13)-KTQIDKLDK(1):0	PI_YEAST	PI_YEAST	sp|P1|PI_YEAST	sp|P1|PI_YEAST	sp|P1|PI_YEAST(61)-sp|P1|PI_YEAST(97)	19	61	97	21051	14.55	18703;	File: "Z:\alinden\DATA\2017\06_Jun\170619[Ridhima_TOMTIM]w and wo blocking protein\RAW\TOMTIM+\R_Gomkale_Linden_TOMTIM+_A11.raw"; ID: "18703"; scans: "21051"	0.857697
yes	DSS	113	1113	3356.82	1.01436	0	Y	Z:\alinden\DATA\2017\06_Jun\170619[Ridhima_TOMTIM]w and wo blocking protein\RAW\TOMTIM+\R_Gomkale_Linden_TOMTIM+_A11.raw;	0	Intra	null	2.09e-12	RWLNSGIISFFMKYIEK(13)-KTQIDKLDK(1):0	PI_YEAST	PI_YEAST	sp|P1|PI_YEAST	sp|P1|PI_YEAST	sp|P1|PI_YEAST(61)-sp|P1|PI_YEAST(97)	19	61	97	21208	11.68	18851;	File: "Z:\alinden\DATA\2017\06_Jun\170619[Ridhima_TOMTIM]w and wo blocking protein\RAW\TOMTIM+\R_Gomkale_Linden_TOMTIM+_A11.raw"; ID: "18851"; scans: "21208"	301.997
yes	DSS	108	1108	3356.82	1.01512	0	G	Z:\alinden\DATA\2017\06_Jun\170619[Ridhima_TOMTIM]w and wo blocking protein\RAW\TOMTIM+\R_Gomkale_Linden_TOMTIM+_A11.raw;	0	Intra	null	3.58e-11	RWLNSGIISFFMKYIEK(13)-KTQIDKLDK(1):0	PI_YEAST	PI_YEAST	sp|P1|PI_YEAST	sp|P1|PI_YEAST	sp|P1|PI_YEAST(61)-sp|P1|PI_YEAST(97)	19	61	97	20908	10.45	18568;	File: "Z:\alinden\DATA\2017\06_Jun\170619[Ridhima_TOMTIM]w and wo blocking protein\RAW\TOMTIM+\R_Gomkale_Linden_TOMTIM+_A11.raw"; ID: "18568"; scans: "20908"	302.223
yes	DSS	109	1109	3356.82	0.01886	0	R	Z:\alinden\DATA\2017\06_Jun\170619[Ridhima_TOMTIM]w and wo blocking protein\RAW\TOMTIM+\R_Gomkale_Linden_TOMTIM+_A11.raw;	0	Intra	null	8.04e-11	RWLNSGIISFFMKYIEK(13)-KTQIDKLDK(1):0	PI_YEAST	PI_YEAST	sp|P1|PI_YEAST	sp|P1|PI_YEAST	sp|P1|PI_YEAST(61)-sp|P1|PI_YEAST(97)	19	61	97	20984	10.09	18640;	File: "Z:\alinden\DATA\2017\06_Jun\170619[Ridhima_TOMTIM]w and wo blocking protein\RAW\TOMTIM+\R_Gomkale_Linden_TOMTIM+_A11.raw"; ID: "18640"; scans: "20984"	5.61669
yes	DSS	152	1152	3117.58	0.00197	0	G	Z:\alinden\DATA\2017\06_Jun\170619[Ridhima_TOMTIM]w and wo blocking protein\RAW\TOMTIM+\R_Gomkale_Linden_TOMTIM+_A11.raw;	0	Intra	5,C(Carbamidomethyl[C]);	9.82e-16	SLLQCDDGITGKER(12)-AVSMVEKNKDIR(7):0	Tim21_YEAST	Tim21_YEAST	sp|P13|Tim21_YEAST	sp|P13|Tim21_YEAST	sp|P13|Tim21_YEAST(135)-sp|P13|Tim21_YEAST(118)	1	135	118	6706	15.01	5180;	File: "Z:\alinden\DATA\2017\06_Jun\170619[Ridhima_TOMTIM]w and wo blocking protein\RAW\TOMTIM+\R_Gomkale_Linden_TOMTIM+_A11.raw"; ID: "5180"; scans: "6706"	0.631696
yes	DSS	162	1162	2275.14	0.01909	0	R	Z:\alinden\DATA\2017\06_Jun\170619[Ridhima_TOMTIM]w and wo blocking protein\RAW\TOMTIM+\R_Gomkale_Linden_TOMTIM+_A11.raw;	1	Inter	5,C(Carbamidomethyl[C]);	0.00632	SLLQCDDGITGKER(12)-IAESK(5):0	Tim21_YEAST	Tim50_YEAST	sp|P13|Tim21_YEAST	sp|P12|Tim50_YEAST	sp|P13|Tim21_YEAST(135)-sp|P12|Tim50_YEAST(476)	1	135	476	7686	2.2	6104;	File: "Z:\alinden\DATA\2017\06_Jun\170619[Ridhima_TOMTIM]w and wo blocking protein\RAW\TOMTIM+\R_Gomkale_Linden_TOMTIM+_A11.raw"; ID: "6104"; scans: "7686"	8.38692
yes	DSS	297	1297	2373.2	-0.00242	0	G	Z:\alinden\DATA\2017\06_Jun\170619[Ridhima_TOMTIM]w and wo blocking protein\RAW\TOMTIM+\R_Gomkale_Linden_TOMTIM+_A13.raw;	0	Intra	5,C(Carbamidomethyl[C]);	7.69e-06	SLLQCDDGITGKER(12)-NKDIR(2):0	Tim21_YEAST	Tim21_YEAST	sp|P13|Tim21_YEAST	sp|P13|Tim21_YEAST	sp|P13|Tim21_YEAST(135)-sp|P13|Tim21_YEAST(120)	5	135	120	6631	5.11	5063;	File: "Z:\alinden\DATA\2017\06_Jun\170619[Ridhima_TOMTIM]w and wo blocking protein\RAW\TOMTIM+\R_Gomkale_Linden_TOMTIM+_A13.raw"; ID: "5063"; scans: "6631"	-1.01929
yes	DSS	296	1296	2373.2	1.00198	0	G	Z:\alinden\DATA\2017\06_Jun\170619[Ridhima_TOMTIM]w and wo blocking protein\RAW\TOMTIM+\R_Gomkale_Linden_TOMTIM+_A13.raw;	0	Intra	5,C(Carbamidomethyl[C]);	1.03e-05	SLLQCDDGITGKER(12)-NKDIR(2):0	Tim21_YEAST	Tim21_YEAST	sp|P13|Tim21_YEAST	sp|P13|Tim21_YEAST	sp|P13|Tim21_YEAST(135)-sp|P13|Tim21_YEAST(120)	5	135	120	6616	4.99	5051;	File: "Z:\alinden\DATA\2017\06_Jun\170619[Ridhima_TOMTIM]w and wo blocking protein\RAW\TOMTIM+\R_Gomkale_Linden_TOMTIM+_A13.raw"; ID: "5051"; scans: "6616"	421.85
yes	DSS	241	1241	2373.2	-0.00046	0	G	Z:\alinden\DATA\2017\06_Jun\170619[Ridhima_TOMTIM]w and wo blocking protein\RAW\TOMTIM+\R_Gomkale_Linden_TOMTIM+_A12.raw;	0	Intra	5,C(Carbamidomethyl[C]);	6.15e-05	SLLQCDDGITGKER(12)-NKDIR(2):0	Tim21_YEAST	Tim21_YEAST	sp|P13|Tim21_YEAST	sp|P13|Tim21_YEAST	sp|P13|Tim21_YEAST(135)-sp|P13|Tim21_YEAST(120)	5	135	120	6357	4.21	4824;	File: "Z:\alinden\DATA\2017\06_Jun\170619[Ridhima_TOMTIM]w and wo blocking protein\RAW\TOMTIM+\R_Gomkale_Linden_TOMTIM+_A12.raw"; ID: "4824"; scans: "6357"	-0.193749
yes	DSS	298	1298	2373.2	2e-05	0	G	Z:\alinden\DATA\2017\06_Jun\170619[Ridhima_TOMTIM]w and wo blocking protein\RAW\TOMTIM+\R_Gomkale_Linden_TOMTIM+_A13.raw;	0	Intra	5,C(Carbamidomethyl[C]);	6.95e-05	SLLQCDDGITGKER(12)-NKDIR(2):0	Tim21_YEAST	Tim21_YEAST	sp|P13|Tim21_YEAST	sp|P13|Tim21_YEAST	sp|P13|Tim21_YEAST(135)-sp|P13|Tim21_YEAST(120)	5	135	120	6757	4.16	5179;	File: "Z:\alinden\DATA\2017\06_Jun\170619[Ridhima_TOMTIM]w and wo blocking protein\RAW\TOMTIM+\R_Gomkale_Linden_TOMTIM+_A13.raw"; ID: "5179"; scans: "6757"	0.008424
yes	DSS	242	1242	2373.2	-0.00112	0	G	Z:\alinden\DATA\2017\06_Jun\170619[Ridhima_TOMTIM]w and wo blocking protein\RAW\TOMTIM+\R_Gomkale_Linden_TOMTIM+_A12.raw;	0	Intra	5,C(Carbamidomethyl[C]);	0.000269	SLLQCDDGITGKER(12)-NKDIR(2):0	Tim21_YEAST	Tim21_YEAST	sp|P13|Tim21_YEAST	sp|P13|Tim21_YEAST	sp|P13|Tim21_YEAST(135)-sp|P13|Tim21_YEAST(120)	5	135	120	6358	3.57	4825;	File: "Z:\alinden\DATA\2017\06_Jun\170619[Ridhima_TOMTIM]w and wo blocking protein\RAW\TOMTIM+\R_Gomkale_Linden_TOMTIM+_A12.raw"; ID: "4825"; scans: "6358"	-0.471737
yes	DSS	161	1161	3412.69	-0.00371	0	Y	Z:\alinden\DATA\2017\06_Jun\170619[Ridhima_TOMTIM]w and wo blocking protein\RAW\TOMTIM+\R_Gomkale_Linden_TOMTIM+_A11.raw;	0	Intra	null	8.95e-08	SNEDAGTAVVATNIESKESFGK(17)-KVEDFKEK(1):0	Tim44_YEAST	Tim44_YEAST	sp|P14|Tim44_YEAST	sp|P14|Tim44_YEAST	sp|P14|Tim44_YEAST(215)-sp|P14|Tim44_YEAST(221)	1	215	221	7618	7.05	6041;	File: "Z:\alinden\DATA\2017\06_Jun\170619[Ridhima_TOMTIM]w and wo blocking protein\RAW\TOMTIM+\R_Gomkale_Linden_TOMTIM+_A11.raw"; ID: "6041"; scans: "7618"	-1.0868
yes	DSS	163	1163	3412.69	0.99421	0	Y	Z:\alinden\DATA\2017\06_Jun\170619[Ridhima_TOMTIM]w and wo blocking protein\RAW\TOMTIM+\R_Gomkale_Linden_TOMTIM+_A11.raw;	0	Intra	null	0.00567	SNEDAGTAVVATNIESKESFGK(17)-KVEDFKEK(6):0	Tim44_YEAST	Tim44_YEAST	sp|P14|Tim44_YEAST	sp|P14|Tim44_YEAST	sp|P14|Tim44_YEAST(215)-sp|P14|Tim44_YEAST(226)	1	215	226	8378	2.25	6757;	File: "Z:\alinden\DATA\2017\06_Jun\170619[Ridhima_TOMTIM]w and wo blocking protein\RAW\TOMTIM+\R_Gomkale_Linden_TOMTIM+_A11.raw"; ID: "6757"; scans: "8378"	291.157
yes	DSS	293	1293	1716.92	-1e-05	0	G	Z:\alinden\DATA\2017\06_Jun\170619[Ridhima_TOMTIM]w and wo blocking protein\RAW\TOMTIM+\R_Gomkale_Linden_TOMTIM+_A13.raw;	0	Intra	null	4.93e-09	TQIDKLDK(5)-WMKR(3):0	PI_YEAST	PI_YEAST	sp|P1|PI_YEAST	sp|P1|PI_YEAST	sp|P1|PI_YEAST(102)-sp|P1|PI_YEAST(94)	3	102	94	6021	8.31	4506;	File: "Z:\alinden\DATA\2017\06_Jun\170619[Ridhima_TOMTIM]w and wo blocking protein\RAW\TOMTIM+\R_Gomkale_Linden_TOMTIM+_A13.raw"; ID: "4506"; scans: "6021"	-0.005821
yes	DSS	317	1317	1716.92	0.00056	0	G	Z:\alinden\DATA\2017\06_Jun\170619[Ridhima_TOMTIM]w and wo blocking protein\RAW\TOMTIM+\R_Gomkale_Linden_TOMTIM+_A14.raw;	0	Intra	null	5e-09	TQIDKLDK(5)-WMKR(3):0	PI_YEAST	PI_YEAST	sp|P1|PI_YEAST	sp|P1|PI_YEAST	sp|P1|PI_YEAST(102)-sp|P1|PI_YEAST(94)	3	102	94	5775	8.3	4213;	File: "Z:\alinden\DATA\2017\06_Jun\170619[Ridhima_TOMTIM]w and wo blocking protein\RAW\TOMTIM+\R_Gomkale_Linden_TOMTIM+_A14.raw"; ID: "4213"; scans: "5775"	0.325974
yes	DSS	294	1294	1716.92	1.00047	0	R	Z:\alinden\DATA\2017\06_Jun\170619[Ridhima_TOMTIM]w and wo blocking protein\RAW\TOMTIM+\R_Gomkale_Linden_TOMTIM+_A13.raw;	0	Intra	null	0.000831	TQIDKLDK(5)-WMKR(3):0	PI_YEAST	PI_YEAST	sp|P1|PI_YEAST	sp|P1|PI_YEAST	sp|P1|PI_YEAST(102)-sp|P1|PI_YEAST(94)	3	102	94	6028	3.08	4513;	File: "Z:\alinden\DATA\2017\06_Jun\170619[Ridhima_TOMTIM]w and wo blocking protein\RAW\TOMTIM+\R_Gomkale_Linden_TOMTIM+_A13.raw"; ID: "4513"; scans: "6028"	582.03
yes	DSS	351	1351	6170.27	4.03808	0	G	Z:\alinden\DATA\2017\06_Jun\170619[Ridhima_TOMTIM]w and wo blocking protein\RAW\TOMTIM+\R_Gomkale_Linden_TOMTIM+_A8b.raw;	0	Intra	44,M(Oxidation[M]);	0.0292	TQIDKLDKIFTPINLNQSHWALGIIDLK(8)-KTIGYVDSLSNGPNAMSFAILTDLQK(1):0	PI_YEAST	PI_YEAST	sp|P1|PI_YEAST	sp|P1|PI_YEAST	sp|P1|PI_YEAST(105)-sp|P1|PI_YEAST(127)	1	105	127	11398	1.53	7273;	File: "Z:\alinden\DATA\2017\06_Jun\170619[Ridhima_TOMTIM]w and wo blocking protein\RAW\TOMTIM+\R_Gomkale_Linden_TOMTIM+_A8b.raw"; ID: "7273"; scans: "11398"	653.907
yes	DSS	320	1320	4368.13	-0.02753	1	R	Z:\alinden\DATA\2017\06_Jun\170619[Ridhima_TOMTIM]w and wo blocking protein\RAW\TOMTIM+\R_Gomkale_Linden_TOMTIM+_A15.raw;	0	Intra	null	1.93e-07	TSGTLVPELNEKDDDQVQK(1)-TSGTLVPELNEKDDDQVQK(1):0	PI_YEAST	PI_YEAST	sp|P1|PI_YEAST	sp|P1|PI_YEAST	sp|P1|PI_YEAST(1)-sp|P1|PI_YEAST(1)	1	1	1	4730	6.71	3013;	File: "Z:\alinden\DATA\2017\06_Jun\170619[Ridhima_TOMTIM]w and wo blocking protein\RAW\TOMTIM+\R_Gomkale_Linden_TOMTIM+_A15.raw"; ID: "3013"; scans: "4730"	-6.30105
yes	DSS	48	1,48	3307.66	3.00504	0	R	Z:\alinden\DATA\2017\06_Jun\170619[Ridhima_TOMTIM]w and wo blocking protein\RAW\TOMTIM+\R_Gomkale_Linden_TOMTIM+_A10b.raw;	0	Intra	null	0.00446	VLDIHDELSQMDDEAGVKLLEK(18)-QNKER(3):0	Jac1_YEAST	Jac1_YEAST	sp|P2|Jac1_YEAST	sp|P2|Jac1_YEAST	sp|P2|Jac1_YEAST(125)-sp|P2|Jac1_YEAST(132)	1	125	132	12159	2.35	10505;	File: "Z:\alinden\DATA\2017\06_Jun\170619[Ridhima_TOMTIM]w and wo blocking protein\RAW\TOMTIM+\R_Gomkale_Linden_TOMTIM+_A10b.raw"; ID: "10505"; scans: "12159"	907.408
yes	DSS	100	1100	2717.43	0.0125	0	R	Z:\alinden\DATA\2017\06_Jun\170619[Ridhima_TOMTIM]w and wo blocking protein\RAW\TOMTIM+\R_Gomkale_Linden_TOMTIM+_A11.raw;	1	Inter	11,M(Oxidation[M]);	0.0252	WLNSGIISFFMKYIEK(12)-KQWK(4):0	PI_YEAST	Tom5_YEAST	sp|P1|PI_YEAST	sp|P6|Tom5_YEAST	sp|P1|PI_YEAST(61)-sp|P6|Tom5_YEAST(50)	1	61	50	17639	1.6	15483;	File: "Z:\alinden\DATA\2017\06_Jun\170619[Ridhima_TOMTIM]w and wo blocking protein\RAW\TOMTIM+\R_Gomkale_Linden_TOMTIM+_A11.raw"; ID: "15483"; scans: "17639"	4.59821
yes	DSS	121	1121	3200.72	-0.01301	0	G	Z:\alinden\DATA\2017\06_Jun\170619[Ridhima_TOMTIM]w and wo blocking protein\RAW\TOMTIM+\R_Gomkale_Linden_TOMTIM+_A11.raw;	0	Intra	null	8.14e-19	WLNSGIISFFMKYIEK(12)-KTQIDKLDK(1):0	PI_YEAST	PI_YEAST	sp|P1|PI_YEAST	sp|P1|PI_YEAST	sp|P1|PI_YEAST(61)-sp|P1|PI_YEAST(97)	19	61	97	24151	18.09	21624;	File: "Z:\alinden\DATA\2017\06_Jun\170619[Ridhima_TOMTIM]w and wo blocking protein\RAW\TOMTIM+\R_Gomkale_Linden_TOMTIM+_A11.raw"; ID: "21624"; scans: "24151"	-4.06345
yes	DSS	204	1204	3200.72	0.00134	0	G	Z:\alinden\DATA\2017\06_Jun\170619[Ridhima_TOMTIM]w and wo blocking protein\RAW\TOMTIM+\R_Gomkale_Linden_TOMTIM+_A12.raw;	0	Intra	null	1.8e-15	WLNSGIISFFMKYIEK(12)-KTQIDKLDK(1):0	PI_YEAST	PI_YEAST	sp|P1|PI_YEAST	sp|P1|PI_YEAST	sp|P1|PI_YEAST(61)-sp|P1|PI_YEAST(97)	19	61	97	25099	14.74	22402;	File: "Z:\alinden\DATA\2017\06_Jun\170619[Ridhima_TOMTIM]w and wo blocking protein\RAW\TOMTIM+\R_Gomkale_Linden_TOMTIM+_A12.raw"; ID: "22402"; scans: "25099"	0.418524
yes	DSS	119	1119	3200.72	-0.00829	0	G	Z:\alinden\DATA\2017\06_Jun\170619[Ridhima_TOMTIM]w and wo blocking protein\RAW\TOMTIM+\R_Gomkale_Linden_TOMTIM+_A11.raw;	0	Intra	null	3.03e-14	WLNSGIISFFMKYIEK(12)-KTQIDKLDK(1):0	PI_YEAST	PI_YEAST	sp|P1|PI_YEAST	sp|P1|PI_YEAST	sp|P1|PI_YEAST(61)-sp|P1|PI_YEAST(97)	19	61	97	24030	13.52	21510;	File: "Z:\alinden\DATA\2017\06_Jun\170619[Ridhima_TOMTIM]w and wo blocking protein\RAW\TOMTIM+\R_Gomkale_Linden_TOMTIM+_A11.raw"; ID: "21510"; scans: "24030"	-2.58923
yes	DSS	18	1,18	3200.72	0.98704	0	G	Z:\alinden\DATA\2017\06_Jun\170619[Ridhima_TOMTIM]w and wo blocking protein\RAW\TOMTIM+\R_Gomkale_Linden_TOMTIM+_A10.raw;	0	Intra	null	4.29e-13	WLNSGIISFFMKYIEK(12)-KTQIDKLDK(1):0	PI_YEAST	PI_YEAST	sp|P1|PI_YEAST	sp|P1|PI_YEAST	sp|P1|PI_YEAST(61)-sp|P1|PI_YEAST(97)	19	61	97	21811	12.37	19276;	File: "Z:\alinden\DATA\2017\06_Jun\170619[Ridhima_TOMTIM]w and wo blocking protein\RAW\TOMTIM+\R_Gomkale_Linden_TOMTIM+_A10.raw"; ID: "19276"; scans: "21811"	308.189
yes	DSS	118	1118	3200.72	-0.00781	0	G	Z:\alinden\DATA\2017\06_Jun\170619[Ridhima_TOMTIM]w and wo blocking protein\RAW\TOMTIM+\R_Gomkale_Linden_TOMTIM+_A11.raw;	0	Intra	null	9.43e-13	WLNSGIISFFMKYIEK(12)-KTQIDKLDK(1):0	PI_YEAST	PI_YEAST	sp|P1|PI_YEAST	sp|P1|PI_YEAST	sp|P1|PI_YEAST(61)-sp|P1|PI_YEAST(97)	19	61	97	24014	12.03	21495;	File: "Z:\alinden\DATA\2017\06_Jun\170619[Ridhima_TOMTIM]w and wo blocking protein\RAW\TOMTIM+\R_Gomkale_Linden_TOMTIM+_A11.raw"; ID: "21495"; scans: "24014"	-2.43932
yes	DSS	120	1120	3200.72	-0.00858	0	G	Z:\alinden\DATA\2017\06_Jun\170619[Ridhima_TOMTIM]w and wo blocking protein\RAW\TOMTIM+\R_Gomkale_Linden_TOMTIM+_A11.raw;	0	Intra	null	2.08e-12	WLNSGIISFFMKYIEK(12)-KTQIDKLDK(1):0	PI_YEAST	PI_YEAST	sp|P1|PI_YEAST	sp|P1|PI_YEAST	sp|P1|PI_YEAST(61)-sp|P1|PI_YEAST(97)	19	61	97	24066	11.68	21544;	File: "Z:\alinden\DATA\2017\06_Jun\170619[Ridhima_TOMTIM]w and wo blocking protein\RAW\TOMTIM+\R_Gomkale_Linden_TOMTIM+_A11.raw"; ID: "21544"; scans: "24066"	-2.67981
yes	DSS	66	1,66	3200.72	0.97179	0	G	Z:\alinden\DATA\2017\06_Jun\170619[Ridhima_TOMTIM]w and wo blocking protein\RAW\TOMTIM+\R_Gomkale_Linden_TOMTIM+_A10b.raw;	0	Intra	null	3.71e-12	WLNSGIISFFMKYIEK(12)-KTQIDKLDK(1):0	PI_YEAST	PI_YEAST	sp|P1|PI_YEAST	sp|P1|PI_YEAST	sp|P1|PI_YEAST(61)-sp|P1|PI_YEAST(97)	19	61	97	22249	11.43	19998;	File: "Z:\alinden\DATA\2017\06_Jun\170619[Ridhima_TOMTIM]w and wo blocking protein\RAW\TOMTIM+\R_Gomkale_Linden_TOMTIM+_A10b.raw"; ID: "19998"; scans: "22249"	303.428
yes	DSS	20	1,20	3200.72	0.00074	0	G	Z:\alinden\DATA\2017\06_Jun\170619[Ridhima_TOMTIM]w and wo blocking protein\RAW\TOMTIM+\R_Gomkale_Linden_TOMTIM+_A10.raw;	0	Intra	null	1.08e-11	WLNSGIISFFMKYIEK(12)-KTQIDKLDK(1):0	PI_YEAST	PI_YEAST	sp|P1|PI_YEAST	sp|P1|PI_YEAST	sp|P1|PI_YEAST(61)-sp|P1|PI_YEAST(97)	19	61	97	21878	10.97	19339;	File: "Z:\alinden\DATA\2017\06_Jun\170619[Ridhima_TOMTIM]w and wo blocking protein\RAW\TOMTIM+\R_Gomkale_Linden_TOMTIM+_A10.raw"; ID: "19339"; scans: "21878"	0.231125
yes	DSS	19	1,19	3200.72	-0.01733	0	G	Z:\alinden\DATA\2017\06_Jun\170619[Ridhima_TOMTIM]w and wo blocking protein\RAW\TOMTIM+\R_Gomkale_Linden_TOMTIM+_A10.raw;	0	Intra	null	3.81e-10	WLNSGIISFFMKYIEK(12)-KTQIDKLDK(1):0	PI_YEAST	PI_YEAST	sp|P1|PI_YEAST	sp|P1|PI_YEAST	sp|P1|PI_YEAST(61)-sp|P1|PI_YEAST(97)	19	61	97	21851	9.42	19314;	File: "Z:\alinden\DATA\2017\06_Jun\170619[Ridhima_TOMTIM]w and wo blocking protein\RAW\TOMTIM+\R_Gomkale_Linden_TOMTIM+_A10.raw"; ID: "19314"; scans: "21851"	-5.41273
yes	DSS	123	1123	3200.72	0.00254	0	G	Z:\alinden\DATA\2017\06_Jun\170619[Ridhima_TOMTIM]w and wo blocking protein\RAW\TOMTIM+\R_Gomkale_Linden_TOMTIM+_A11.raw;	0	Intra	null	1.51e-07	WLNSGIISFFMKYIEK(12)-KTQIDKLDK(1):0	PI_YEAST	PI_YEAST	sp|P1|PI_YEAST	sp|P1|PI_YEAST	sp|P1|PI_YEAST(61)-sp|P1|PI_YEAST(97)	19	61	97	24286	6.82	21752;	File: "Z:\alinden\DATA\2017\06_Jun\170619[Ridhima_TOMTIM]w and wo blocking protein\RAW\TOMTIM+\R_Gomkale_Linden_TOMTIM+_A11.raw"; ID: "21752"; scans: "24286"	0.793321
yes	DSS	205	1205	4088.12	2.03029	1	R	Z:\alinden\DATA\2017\06_Jun\170619[Ridhima_TOMTIM]w and wo blocking protein\RAW\TOMTIM+\R_Gomkale_Linden_TOMTIM+_A12.raw;	0	Intra	null	0.00815	WLNSGIISFFMKYIEK(12)-WLNSGIISFFMKYIEK(12):0	PI_YEAST	PI_YEAST	sp|P1|PI_YEAST	sp|P1|PI_YEAST	sp|P1|PI_YEAST(61)-sp|P1|PI_YEAST(61)	1	61	61	26451	2.09	23674;	File: "Z:\alinden\DATA\2017\06_Jun\170619[Ridhima_TOMTIM]w and wo blocking protein\RAW\TOMTIM+\R_Gomkale_Linden_TOMTIM+_A12.raw"; ID: "23674"; scans: "26451"	496.263
yes	DSS	419	1419	8100.76	1.96704	0	R	Z:\alinden\DATA\2017\06_Jun\170619[Ridhima_TOMTIM]w and wo blocking protein\RAW\TOMTIM+\R_Gomkale_Linden_TOMTIM+_A9b.raw;	1	Inter	21,C(Carbamidomethyl[C]);30,C(Carbamidomethyl[C]);35,C(Carbamidomethyl[C]);	0.0851	YVMEESKHTIGEDFDLIHLDCPQQPNGYDCGIYVCMNTLYGSADAPLDFDYKDAIR(7)-PEVKPETHINLK(4):0	PI_YEAST	HSSTim23_YEAST	sp|P1|PI_YEAST	sp|P10|HSSTim23_YEAST	sp|P1|PI_YEAST(159)-sp|P10|HSSTim23_YEAST(47)	1	159	47	14044	1.07	11043;	File: "Z:\alinden\DATA\2017\06_Jun\170619[Ridhima_TOMTIM]w and wo blocking protein\RAW\TOMTIM+\R_Gomkale_Linden_TOMTIM+_A9b.raw"; ID: "11043"; scans: "14044"	242.732
yes	DSS	45	1,45	3260.85	0.00014	0	G	Z:\alinden\DATA\2017\06_Jun\170619[Ridhima_TOMTIM]w and wo blocking protein\RAW\TOMTIM+\R_Gomkale_Linden_TOMTIM+_A10.raw;	0	Intra	null	3.42e-10	YYLIKPKLHPVSNSK(7)-IALVHLEAKESK(9):0	Tim21_YEAST	Tim21_YEAST	sp|P13|Tim21_YEAST	sp|P13|Tim21_YEAST	sp|P13|Tim21_YEAST(219)-sp|P13|Tim21_YEAST(190)	3	219	190	7920	9.47	6199;	File: "Z:\alinden\DATA\2017\06_Jun\170619[Ridhima_TOMTIM]w and wo blocking protein\RAW\TOMTIM+\R_Gomkale_Linden_TOMTIM+_A10.raw"; ID: "6199"; scans: "7920"	0.04292
yes	DSS	82	1,82	3260.85	-2e-05	0	Y	Z:\alinden\DATA\2017\06_Jun\170619[Ridhima_TOMTIM]w and wo blocking protein\RAW\TOMTIM+\R_Gomkale_Linden_TOMTIM+_A10b.raw;	0	Intra	null	2.77e-09	YYLIKPKLHPVSNSK(7)-IALVHLEAKESK(9):0	Tim21_YEAST	Tim21_YEAST	sp|P13|Tim21_YEAST	sp|P13|Tim21_YEAST	sp|P13|Tim21_YEAST(219)-sp|P13|Tim21_YEAST(190)	3	219	190	8670	8.56	7225;	File: "Z:\alinden\DATA\2017\06_Jun\170619[Ridhima_TOMTIM]w and wo blocking protein\RAW\TOMTIM+\R_Gomkale_Linden_TOMTIM+_A10b.raw"; ID: "7225"; scans: "8670"	-0.006131
yes	DSS	83	1,83	3260.85	1.00136	0	R	Z:\alinden\DATA\2017\06_Jun\170619[Ridhima_TOMTIM]w and wo blocking protein\RAW\TOMTIM+\R_Gomkale_Linden_TOMTIM+_A10b.raw;	0	Intra	null	8.06e-09	YYLIKPKLHPVSNSK(7)-IALVHLEAKESK(9):0	Tim21_YEAST	Tim21_YEAST	sp|P13|Tim21_YEAST	sp|P13|Tim21_YEAST	sp|P13|Tim21_YEAST(219)-sp|P13|Tim21_YEAST(190)	3	219	190	8749	8.09	7299;	File: "Z:\alinden\DATA\2017\06_Jun\170619[Ridhima_TOMTIM]w and wo blocking protein\RAW\TOMTIM+\R_Gomkale_Linden_TOMTIM+_A10b.raw"; ID: "7299"; scans: "8749"	306.896
yes	DSS	142	1142	2768.56	0.00075	0	R	Z:\alinden\DATA\2017\06_Jun\170619[Ridhima_TOMTIM]w and wo blocking protein\RAW\TOMTIM+\R_Gomkale_Linden_TOMTIM+_A11.raw;	0	Intra	null	0.000746	YYLIKPKLHPVSNSK(7)-KLDKEGR(4):0	Tim21_YEAST	Tim21_YEAST	sp|P13|Tim21_YEAST	sp|P13|Tim21_YEAST	sp|P13|Tim21_YEAST(219)-sp|P13|Tim21_YEAST(164)	2	219	164	5079	3.13	3645;	File: "Z:\alinden\DATA\2017\06_Jun\170619[Ridhima_TOMTIM]w and wo blocking protein\RAW\TOMTIM+\R_Gomkale_Linden_TOMTIM+_A11.raw"; ID: "3645"; scans: "5079"	0.2708
yes	DSS	142	1142	2768.56	0.00075	0	R	Z:\alinden\DATA\2017\06_Jun\170619[Ridhima_TOMTIM]w and wo blocking protein\RAW\TOMTIM+\R_Gomkale_Linden_TOMTIM+_A11.raw;	0	Intra	null	0.000746	YYLIKPKLHPVSNSK(7)-KLDKEGR(4):0	Tim21_YEAST	Tim21_YEAST	sp|P13|Tim21_YEAST	sp|P13|Tim21_YEAST	sp|P13|Tim21_YEAST(219)-sp|P13|Tim21_YEAST(164)	2	219	164	5079	3.13	3645;	File: "Z:\alinden\DATA\2017\06_Jun\170619[Ridhima_TOMTIM]w and wo blocking protein\RAW\TOMTIM+\R_Gomkale_Linden_TOMTIM+_A11.raw"; ID: "3645"; scans: "5079"	0.2708
no	DSS	1	1,1	4031.03	2.98823	0	none	Z:\alinden\DATA\2017\06_Jun\170619[Ridhima_TOMTIM]w and wo blocking protein\RAW\TOMTIM-\R_Gomkale_Linden_TOMTIM-_A10.raw;	1	Intra	null	1.01e-09	GYFIKPTVFGDVKEDMR(13)-YVDIGKNEGATLITGGER(6):0	ALDH4_YEAST	ALDH4_YEAST	sp|P46367|ALDH4_YEAST	sp|P46367|ALDH4_YEAST	sp|P46367|ALDH4_YEAST(412)-sp|P46367|ALDH4_YEAST(383)	6	412	383	12169	8.99568	10061;	File: "Z:\alinden\DATA\2017\06_Jun\170619[Ridhima_TOMTIM]w and wo blocking protein\RAW\TOMTIM-\R_Gomkale_Linden_TOMTIM-_A10.raw"; ID: "10061"; scans: "12169"	740.572
no	DSS	2	1,2	5106.55	1.98986	0	none	Z:\alinden\DATA\2017\06_Jun\170619[Ridhima_TOMTIM]w and wo blocking protein\RAW\TOMTIM-\R_Gomkale_Linden_TOMTIM-_A10.raw;	1	Intra	null	1.37e-11	AASESIKVGDPFDESTFQGAQTSQMQLNK(7)-LGSKGYFIKPTVFGDVK(4):0	ALDH4_YEAST	ALDH4_YEAST	sp|P46367|ALDH4_YEAST	sp|P46367|ALDH4_YEAST	sp|P46367|ALDH4_YEAST(352)-sp|P46367|ALDH4_YEAST(399)	18	352	399	12199	10.8633	10090;	File: "Z:\alinden\DATA\2017\06_Jun\170619[Ridhima_TOMTIM]w and wo blocking protein\RAW\TOMTIM-\R_Gomkale_Linden_TOMTIM-_A10.raw"; ID: "10090"; scans: "12199"	389.439
no	DSS	3	1,3	5106.55	3.9936	0	none	Z:\alinden\DATA\2017\06_Jun\170619[Ridhima_TOMTIM]w and wo blocking protein\RAW\TOMTIM-\R_Gomkale_Linden_TOMTIM-_A10.raw;	1	Intra	null	6.94e-16	AASESIKVGDPFDESTFQGAQTSQMQLNK(7)-LGSKGYFIKPTVFGDVK(4):0	ALDH4_YEAST	ALDH4_YEAST	sp|P46367|ALDH4_YEAST	sp|P46367|ALDH4_YEAST	sp|P46367|ALDH4_YEAST(352)-sp|P46367|ALDH4_YEAST(399)	18	352	399	12200	15.1586	10091;	File: "Z:\alinden\DATA\2017\06_Jun\170619[Ridhima_TOMTIM]w and wo blocking protein\RAW\TOMTIM-\R_Gomkale_Linden_TOMTIM-_A10.raw"; ID: "10091"; scans: "12200"	781.289
no	DSS	4	1,4	5106.55	-0.01568	0	none	Z:\alinden\DATA\2017\06_Jun\170619[Ridhima_TOMTIM]w and wo blocking protein\RAW\TOMTIM-\R_Gomkale_Linden_TOMTIM-_A10.raw;	1	Intra	null	1.44e-15	AASESIKVGDPFDESTFQGAQTSQMQLNK(7)-LGSKGYFIKPTVFGDVK(4):0	ALDH4_YEAST	ALDH4_YEAST	sp|P46367|ALDH4_YEAST	sp|P46367|ALDH4_YEAST	sp|P46367|ALDH4_YEAST(352)-sp|P46367|ALDH4_YEAST(399)	18	352	399	12232	14.8416	10120;	File: "Z:\alinden\DATA\2017\06_Jun\170619[Ridhima_TOMTIM]w and wo blocking protein\RAW\TOMTIM-\R_Gomkale_Linden_TOMTIM-_A10.raw"; ID: "10120"; scans: "12232"	-3.06997
no	DSS	5	1,5	3796.86	0.9893	0	none	Z:\alinden\DATA\2017\06_Jun\170619[Ridhima_TOMTIM]w and wo blocking protein\RAW\TOMTIM-\R_Gomkale_Linden_TOMTIM-_A10.raw;	1	Intra	null	3.02e-25	ITTVYKAMEDDVDEAVAAAK(6)-KTFDVINPSNEEK(1):0	ALDH5_YEAST	ALDH5_YEAST	sp|P40047|ALDH5_YEAST	sp|P40047|ALDH5_YEAST	sp|P40047|ALDH5_YEAST(77)-sp|P40047|ALDH5_YEAST(59)	1	77	59	12340	24.52	10222;	File: "Z:\alinden\DATA\2017\06_Jun\170619[Ridhima_TOMTIM]w and wo blocking protein\RAW\TOMTIM-\R_Gomkale_Linden_TOMTIM-_A10.raw"; ID: "10222"; scans: "12340"	260.42
no	DSS	6	1,6	5392.57	1.96749	0	none	Z:\alinden\DATA\2017\06_Jun\170619[Ridhima_TOMTIM]w and wo blocking protein\RAW\TOMTIM-\R_Gomkale_Linden_TOMTIM-_A10.raw;	1	Intra	1,C(Carbamidomethyl[C]);	0.00145	CVVNATGPYSDAILQMDRNPSGLPDSPLNDNSKIK(33)-VMGDEFNWSEKK(11):0	GPDM_YEAST	GPDM_YEAST	sp|P32191|GPDM_YEAST	sp|P32191|GPDM_YEAST	sp|P32191|GPDM_YEAST(311)-sp|P32191|GPDM_YEAST(631)	7	311	631	12385	2.83863	10264;	File: "Z:\alinden\DATA\2017\06_Jun\170619[Ridhima_TOMTIM]w and wo blocking protein\RAW\TOMTIM-\R_Gomkale_Linden_TOMTIM-_A10.raw"; ID: "10264"; scans: "12385"	364.651
no	DSS	7	1,7	5106.55	3.0058	0	none	Z:\alinden\DATA\2017\06_Jun\170619[Ridhima_TOMTIM]w and wo blocking protein\RAW\TOMTIM-\R_Gomkale_Linden_TOMTIM-_A10.raw;	1	Intra	null	1.67e-15	AASESIKVGDPFDESTFQGAQTSQMQLNK(7)-LGSKGYFIKPTVFGDVK(4):0	ALDH4_YEAST	ALDH4_YEAST	sp|P46367|ALDH4_YEAST	sp|P46367|ALDH4_YEAST	sp|P46367|ALDH4_YEAST(352)-sp|P46367|ALDH4_YEAST(399)	18	352	399	12411	14.7773	10289;	File: "Z:\alinden\DATA\2017\06_Jun\170619[Ridhima_TOMTIM]w and wo blocking protein\RAW\TOMTIM-\R_Gomkale_Linden_TOMTIM-_A10.raw"; ID: "10289"; scans: "12411"	588.154
no	DSS	8	1,8	4031.03	-0.00115	0	none	Z:\alinden\DATA\2017\06_Jun\170619[Ridhima_TOMTIM]w and wo blocking protein\RAW\TOMTIM-\R_Gomkale_Linden_TOMTIM-_A10.raw;	1	Intra	null	5.08e-21	GYFIKPTVFGDVKEDMR(5)-YVDIGKNEGATLITGGER(6):0	ALDH4_YEAST	ALDH4_YEAST	sp|P46367|ALDH4_YEAST	sp|P46367|ALDH4_YEAST	sp|P46367|ALDH4_YEAST(404)-sp|P46367|ALDH4_YEAST(383)	3	404	383	12414	20.2941	10292;	File: "Z:\alinden\DATA\2017\06_Jun\170619[Ridhima_TOMTIM]w and wo blocking protein\RAW\TOMTIM-\R_Gomkale_Linden_TOMTIM-_A10.raw"; ID: "10292"; scans: "12414"	-0.285215
no	DSS	10	1,10	4385.3	-0.01143	0	none	Z:\alinden\DATA\2017\06_Jun\170619[Ridhima_TOMTIM]w and wo blocking protein\RAW\TOMTIM-\R_Gomkale_Linden_TOMTIM-_A10.raw;	1	Intra	null	1.85e-09	ILKYVDIGKNEGATLITGGER(3)-GYFIKPTVFGDVKEDMR(13):0	ALDH4_YEAST	ALDH4_YEAST	sp|P46367|ALDH4_YEAST	sp|P46367|ALDH4_YEAST	sp|P46367|ALDH4_YEAST(377)-sp|P46367|ALDH4_YEAST(412)	8	377	412	12450	8.73283	10326;	File: "Z:\alinden\DATA\2017\06_Jun\170619[Ridhima_TOMTIM]w and wo blocking protein\RAW\TOMTIM-\R_Gomkale_Linden_TOMTIM-_A10.raw"; ID: "10326"; scans: "12450"	-2.60584
no	DSS	11	1,11	3963.16	-0.02944	0	none	Z:\alinden\DATA\2017\06_Jun\170619[Ridhima_TOMTIM]w and wo blocking protein\RAW\TOMTIM-\R_Gomkale_Linden_TOMTIM-_A10.raw;	1	Intra	null	1.33e-15	IVKEEIFGPVVTVTKFK(15)-YVDIGKNEGATLITGGER(6):0	ALDH4_YEAST	ALDH4_YEAST	sp|P46367|ALDH4_YEAST	sp|P46367|ALDH4_YEAST	sp|P46367|ALDH4_YEAST(431)-sp|P46367|ALDH4_YEAST(383)	6	431	383	12468	14.8761	10343;	File: "Z:\alinden\DATA\2017\06_Jun\170619[Ridhima_TOMTIM]w and wo blocking protein\RAW\TOMTIM-\R_Gomkale_Linden_TOMTIM-_A10.raw"; ID: "10343"; scans: "12468"	-7.42658
no	DSS	12	1,12	3963.16	0.99011	0	none	Z:\alinden\DATA\2017\06_Jun\170619[Ridhima_TOMTIM]w and wo blocking protein\RAW\TOMTIM-\R_Gomkale_Linden_TOMTIM-_A10.raw;	1	Intra	null	2.75e-06	IVKEEIFGPVVTVTKFK(15)-YVDIGKNEGATLITGGER(6):0	ALDH4_YEAST	ALDH4_YEAST	sp|P46367|ALDH4_YEAST	sp|P46367|ALDH4_YEAST	sp|P46367|ALDH4_YEAST(431)-sp|P46367|ALDH4_YEAST(383)	6	431	383	12502	5.56067	10375;	File: "Z:\alinden\DATA\2017\06_Jun\170619[Ridhima_TOMTIM]w and wo blocking protein\RAW\TOMTIM-\R_Gomkale_Linden_TOMTIM-_A10.raw"; ID: "10375"; scans: "12502"	249.703
no	DSS	13	1,13	3963.16	0.98871	0	none	Z:\alinden\DATA\2017\06_Jun\170619[Ridhima_TOMTIM]w and wo blocking protein\RAW\TOMTIM-\R_Gomkale_Linden_TOMTIM-_A10.raw;	1	Intra	null	1.05e-05	IVKEEIFGPVVTVTKFK(15)-YVDIGKNEGATLITGGER(6):0	ALDH4_YEAST	ALDH4_YEAST	sp|P46367|ALDH4_YEAST	sp|P46367|ALDH4_YEAST	sp|P46367|ALDH4_YEAST(431)-sp|P46367|ALDH4_YEAST(383)	6	431	383	12504	4.97881	10377;	File: "Z:\alinden\DATA\2017\06_Jun\170619[Ridhima_TOMTIM]w and wo blocking protein\RAW\TOMTIM-\R_Gomkale_Linden_TOMTIM-_A10.raw"; ID: "10377"; scans: "12504"	249.35
no	DSS	14	1,14	4385.3	3.99797	0	none	Z:\alinden\DATA\2017\06_Jun\170619[Ridhima_TOMTIM]w and wo blocking protein\RAW\TOMTIM-\R_Gomkale_Linden_TOMTIM-_A10.raw;	1	Intra	null	8.64e-06	ILKYVDIGKNEGATLITGGER(3)-GYFIKPTVFGDVKEDMR(13):0	ALDH4_YEAST	ALDH4_YEAST	sp|P46367|ALDH4_YEAST	sp|P46367|ALDH4_YEAST	sp|P46367|ALDH4_YEAST(377)-sp|P46367|ALDH4_YEAST(412)	8	377	412	12506	5.06349	10379;	File: "Z:\alinden\DATA\2017\06_Jun\170619[Ridhima_TOMTIM]w and wo blocking protein\RAW\TOMTIM-\R_Gomkale_Linden_TOMTIM-_A10.raw"; ID: "10379"; scans: "12506"	910.636
no	DSS	16	1,16	4772.46	0.01362	0	none	Z:\alinden\DATA\2017\06_Jun\170619[Ridhima_TOMTIM]w and wo blocking protein\RAW\TOMTIM-\R_Gomkale_Linden_TOMTIM-_A10.raw;	1	Intra	null	3.43e-06	QKLPWAQLTEPEKQAVWYISYGEWGPR(13)-PVLNKGDSSFIAK(5):0	COX5A_YEAST	COX5A_YEAST	sp|P00424|COX5A_YEAST	sp|P00424|COX5A_YEAST	sp|P00424|COX5A_YEAST(69)-sp|P00424|COX5A_YEAST(89)	21	69	89	12621	5.46471	10487;	File: "Z:\alinden\DATA\2017\06_Jun\170619[Ridhima_TOMTIM]w and wo blocking protein\RAW\TOMTIM-\R_Gomkale_Linden_TOMTIM-_A10.raw"; ID: "10487"; scans: "12621"	2.85326
no	DSS	17	1,17	4772.46	2.00982	0	none	Z:\alinden\DATA\2017\06_Jun\170619[Ridhima_TOMTIM]w and wo blocking protein\RAW\TOMTIM-\R_Gomkale_Linden_TOMTIM-_A10.raw;	1	Intra	null	7.3e-06	QKLPWAQLTEPEKQAVWYISYGEWGPR(13)-PVLNKGDSSFIAK(5):0	COX5A_YEAST	COX5A_YEAST	sp|P00424|COX5A_YEAST	sp|P00424|COX5A_YEAST	sp|P00424|COX5A_YEAST(69)-sp|P00424|COX5A_YEAST(89)	21	69	89	12757	5.13668	10616;	File: "Z:\alinden\DATA\2017\06_Jun\170619[Ridhima_TOMTIM]w and wo blocking protein\RAW\TOMTIM-\R_Gomkale_Linden_TOMTIM-_A10.raw"; ID: "10616"; scans: "12757"	420.862
no	DSS	18	1,18	4317.42	0.99927	0	none	Z:\alinden\DATA\2017\06_Jun\170619[Ridhima_TOMTIM]w and wo blocking protein\RAW\TOMTIM-\R_Gomkale_Linden_TOMTIM-_A10.raw;	1	Intra	null	8.13e-16	ILKYVDIGKNEGATLITGGER(3)-IVKEEIFGPVVTVTKFK(15):0	ALDH4_YEAST	ALDH4_YEAST	sp|P46367|ALDH4_YEAST	sp|P46367|ALDH4_YEAST	sp|P46367|ALDH4_YEAST(377)-sp|P46367|ALDH4_YEAST(431)	3	377	431	12798	15.0899	10654;	File: "Z:\alinden\DATA\2017\06_Jun\170619[Ridhima_TOMTIM]w and wo blocking protein\RAW\TOMTIM-\R_Gomkale_Linden_TOMTIM-_A10.raw"; ID: "10654"; scans: "12798"	231.343
no	DSS	19	1,19	4772.46	4.0203	0	none	Z:\alinden\DATA\2017\06_Jun\170619[Ridhima_TOMTIM]w and wo blocking protein\RAW\TOMTIM-\R_Gomkale_Linden_TOMTIM-_A10.raw;	1	Intra	null	9.67e-07	QKLPWAQLTEPEKQAVWYISYGEWGPR(13)-PVLNKGDSSFIAK(5):0	COX5A_YEAST	COX5A_YEAST	sp|P00424|COX5A_YEAST	sp|P00424|COX5A_YEAST	sp|P00424|COX5A_YEAST(69)-sp|P00424|COX5A_YEAST(89)	21	69	89	12809	6.01457	10665;	File: "Z:\alinden\DATA\2017\06_Jun\170619[Ridhima_TOMTIM]w and wo blocking protein\RAW\TOMTIM-\R_Gomkale_Linden_TOMTIM-_A10.raw"; ID: "10665"; scans: "12809"	841.509
no	DSS	20	1,20	3688	-0.01353	0	none	Z:\alinden\DATA\2017\06_Jun\170619[Ridhima_TOMTIM]w and wo blocking protein\RAW\TOMTIM-\R_Gomkale_Linden_TOMTIM-_A10.raw;	1	Intra	null	1.14e-16	YVDIGKNEGATLITGGER(6)-IVKEEIFGPVVTVTK(3):0	ALDH4_YEAST	ALDH4_YEAST	sp|P46367|ALDH4_YEAST	sp|P46367|ALDH4_YEAST	sp|P46367|ALDH4_YEAST(383)-sp|P46367|ALDH4_YEAST(419)	13	383	419	12875	15.9431	10727;	File: "Z:\alinden\DATA\2017\06_Jun\170619[Ridhima_TOMTIM]w and wo blocking protein\RAW\TOMTIM-\R_Gomkale_Linden_TOMTIM-_A10.raw"; ID: "10727"; scans: "12875"	-3.66767
no	DSS	21	1,21	4772.46	1.00752	0	none	Z:\alinden\DATA\2017\06_Jun\170619[Ridhima_TOMTIM]w and wo blocking protein\RAW\TOMTIM-\R_Gomkale_Linden_TOMTIM-_A10.raw;	1	Intra	null	0.00194	QKLPWAQLTEPEKQAVWYISYGEWGPR(13)-PVLNKGDSSFIAK(5):0	COX5A_YEAST	COX5A_YEAST	sp|P00424|COX5A_YEAST	sp|P00424|COX5A_YEAST	sp|P00424|COX5A_YEAST(69)-sp|P00424|COX5A_YEAST(89)	21	69	89	12956	2.7122	10804;	File: "Z:\alinden\DATA\2017\06_Jun\170619[Ridhima_TOMTIM]w and wo blocking protein\RAW\TOMTIM-\R_Gomkale_Linden_TOMTIM-_A10.raw"; ID: "10804"; scans: "12956"	211.022
no	DSS	22	1,22	3688	2.99604	0	none	Z:\alinden\DATA\2017\06_Jun\170619[Ridhima_TOMTIM]w and wo blocking protein\RAW\TOMTIM-\R_Gomkale_Linden_TOMTIM-_A10.raw;	1	Intra	null	1.68e-14	YVDIGKNEGATLITGGER(6)-IVKEEIFGPVVTVTK(3):0	ALDH4_YEAST	ALDH4_YEAST	sp|P46367|ALDH4_YEAST	sp|P46367|ALDH4_YEAST	sp|P46367|ALDH4_YEAST(383)-sp|P46367|ALDH4_YEAST(419)	13	383	419	12969	13.7747	10816;	File: "Z:\alinden\DATA\2017\06_Jun\170619[Ridhima_TOMTIM]w and wo blocking protein\RAW\TOMTIM-\R_Gomkale_Linden_TOMTIM-_A10.raw"; ID: "10816"; scans: "12969"	811.495
no	DSS	23	1,23	4042.26	0.99725	0	none	Z:\alinden\DATA\2017\06_Jun\170619[Ridhima_TOMTIM]w and wo blocking protein\RAW\TOMTIM-\R_Gomkale_Linden_TOMTIM-_A10.raw;	1	Intra	null	9.41e-13	ILKYVDIGKNEGATLITGGER(3)-IVKEEIFGPVVTVTK(3):0	ALDH4_YEAST	ALDH4_YEAST	sp|P46367|ALDH4_YEAST	sp|P46367|ALDH4_YEAST	sp|P46367|ALDH4_YEAST(377)-sp|P46367|ALDH4_YEAST(419)	29	377	419	12977	12.0264	10823;	File: "Z:\alinden\DATA\2017\06_Jun\170619[Ridhima_TOMTIM]w and wo blocking protein\RAW\TOMTIM-\R_Gomkale_Linden_TOMTIM-_A10.raw"; ID: "10823"; scans: "12977"	246.584
no	DSS	24	1,24	4042.26	-0.0112	0	none	Z:\alinden\DATA\2017\06_Jun\170619[Ridhima_TOMTIM]w and wo blocking protein\RAW\TOMTIM-\R_Gomkale_Linden_TOMTIM-_A10.raw;	1	Intra	null	5.4e-15	ILKYVDIGKNEGATLITGGER(3)-IVKEEIFGPVVTVTK(3):0	ALDH4_YEAST	ALDH4_YEAST	sp|P46367|ALDH4_YEAST	sp|P46367|ALDH4_YEAST	sp|P46367|ALDH4_YEAST(377)-sp|P46367|ALDH4_YEAST(419)	29	377	419	12988	14.2676	10834;	File: "Z:\alinden\DATA\2017\06_Jun\170619[Ridhima_TOMTIM]w and wo blocking protein\RAW\TOMTIM-\R_Gomkale_Linden_TOMTIM-_A10.raw"; ID: "10834"; scans: "12988"	-2.77004
no	DSS	25	1,25	4042.26	1.99215	0	none	Z:\alinden\DATA\2017\06_Jun\170619[Ridhima_TOMTIM]w and wo blocking protein\RAW\TOMTIM-\R_Gomkale_Linden_TOMTIM-_A10.raw;	1	Intra	null	1.27e-12	ILKYVDIGKNEGATLITGGER(3)-IVKEEIFGPVVTVTK(3):0	ALDH4_YEAST	ALDH4_YEAST	sp|P46367|ALDH4_YEAST	sp|P46367|ALDH4_YEAST	sp|P46367|ALDH4_YEAST(377)-sp|P46367|ALDH4_YEAST(419)	29	377	419	12995	11.8962	10840;	File: "Z:\alinden\DATA\2017\06_Jun\170619[Ridhima_TOMTIM]w and wo blocking protein\RAW\TOMTIM-\R_Gomkale_Linden_TOMTIM-_A10.raw"; ID: "10840"; scans: "12995"	492.465
no	DSS	26	1,26	4042.26	2.99255	0	none	Z:\alinden\DATA\2017\06_Jun\170619[Ridhima_TOMTIM]w and wo blocking protein\RAW\TOMTIM-\R_Gomkale_Linden_TOMTIM-_A10.raw;	1	Intra	null	8.39e-18	ILKYVDIGKNEGATLITGGER(3)-IVKEEIFGPVVTVTK(3):0	ALDH4_YEAST	ALDH4_YEAST	sp|P46367|ALDH4_YEAST	sp|P46367|ALDH4_YEAST	sp|P46367|ALDH4_YEAST(377)-sp|P46367|ALDH4_YEAST(419)	29	377	419	13043	17.0762	10884;	File: "Z:\alinden\DATA\2017\06_Jun\170619[Ridhima_TOMTIM]w and wo blocking protein\RAW\TOMTIM-\R_Gomkale_Linden_TOMTIM-_A10.raw"; ID: "10884"; scans: "13043"	739.584
no	DSS	27	1,27	4042.26	2.99344	0	none	Z:\alinden\DATA\2017\06_Jun\170619[Ridhima_TOMTIM]w and wo blocking protein\RAW\TOMTIM-\R_Gomkale_Linden_TOMTIM-_A10.raw;	1	Intra	null	9.21e-19	ILKYVDIGKNEGATLITGGER(3)-IVKEEIFGPVVTVTK(3):0	ALDH4_YEAST	ALDH4_YEAST	sp|P46367|ALDH4_YEAST	sp|P46367|ALDH4_YEAST	sp|P46367|ALDH4_YEAST(377)-sp|P46367|ALDH4_YEAST(419)	29	377	419	13104	18.0357	10939;	File: "Z:\alinden\DATA\2017\06_Jun\170619[Ridhima_TOMTIM]w and wo blocking protein\RAW\TOMTIM-\R_Gomkale_Linden_TOMTIM-_A10.raw"; ID: "10939"; scans: "13104"	739.804
no	DSS	28	1,28	4042.26	1.99155	0	none	Z:\alinden\DATA\2017\06_Jun\170619[Ridhima_TOMTIM]w and wo blocking protein\RAW\TOMTIM-\R_Gomkale_Linden_TOMTIM-_A10.raw;	1	Intra	null	3.05e-17	ILKYVDIGKNEGATLITGGER(3)-IVKEEIFGPVVTVTK(3):0	ALDH4_YEAST	ALDH4_YEAST	sp|P46367|ALDH4_YEAST	sp|P46367|ALDH4_YEAST	sp|P46367|ALDH4_YEAST(377)-sp|P46367|ALDH4_YEAST(419)	29	377	419	13105	16.5157	10940;	File: "Z:\alinden\DATA\2017\06_Jun\170619[Ridhima_TOMTIM]w and wo blocking protein\RAW\TOMTIM-\R_Gomkale_Linden_TOMTIM-_A10.raw"; ID: "10940"; scans: "13105"	492.317
no	DSS	29	1,29	3499.82	0.99288	0	none	Z:\alinden\DATA\2017\06_Jun\170619[Ridhima_TOMTIM]w and wo blocking protein\RAW\TOMTIM-\R_Gomkale_Linden_TOMTIM-_A10.raw;	1	Intra	null	5.55e-07	YVDIGKNEGATLITGGER(6)-GYFIKPTVFGDVK(5):0	ALDH4_YEAST	ALDH4_YEAST	sp|P46367|ALDH4_YEAST	sp|P46367|ALDH4_YEAST	sp|P46367|ALDH4_YEAST(383)-sp|P46367|ALDH4_YEAST(404)	21	383	404	13194	6.25571	11019;	File: "Z:\alinden\DATA\2017\06_Jun\170619[Ridhima_TOMTIM]w and wo blocking protein\RAW\TOMTIM-\R_Gomkale_Linden_TOMTIM-_A10.raw"; ID: "11019"; scans: "13194"	283.532
no	DSS	30	1,30	3499.82	0.98854	0	none	Z:\alinden\DATA\2017\06_Jun\170619[Ridhima_TOMTIM]w and wo blocking protein\RAW\TOMTIM-\R_Gomkale_Linden_TOMTIM-_A10.raw;	1	Intra	null	2.11e-14	YVDIGKNEGATLITGGER(6)-GYFIKPTVFGDVK(5):0	ALDH4_YEAST	ALDH4_YEAST	sp|P46367|ALDH4_YEAST	sp|P46367|ALDH4_YEAST	sp|P46367|ALDH4_YEAST(383)-sp|P46367|ALDH4_YEAST(404)	21	383	404	13245	13.6757	11065;	File: "Z:\alinden\DATA\2017\06_Jun\170619[Ridhima_TOMTIM]w and wo blocking protein\RAW\TOMTIM-\R_Gomkale_Linden_TOMTIM-_A10.raw"; ID: "11065"; scans: "13245"	282.293
no	DSS	31	1,31	5423.68	1.99051	0	none	Z:\alinden\DATA\2017\06_Jun\170619[Ridhima_TOMTIM]w and wo blocking protein\RAW\TOMTIM-\R_Gomkale_Linden_TOMTIM-_A10.raw;	1	Intra	null	1.12e-13	FKSADEVINMANDSEYGLAAGIHTSNINTALK(2)-YVDIGKNEGATLITGGER(6):0	ALDH4_YEAST	ALDH4_YEAST	sp|P46367|ALDH4_YEAST	sp|P46367|ALDH4_YEAST	sp|P46367|ALDH4_YEAST(433)-sp|P46367|ALDH4_YEAST(383)	10	433	383	13265	12.9508	11083;	File: "Z:\alinden\DATA\2017\06_Jun\170619[Ridhima_TOMTIM]w and wo blocking protein\RAW\TOMTIM-\R_Gomkale_Linden_TOMTIM-_A10.raw"; ID: "11083"; scans: "13265"	366.801
no	DSS	32	1,32	4042.26	0.99605	0	none	Z:\alinden\DATA\2017\06_Jun\170619[Ridhima_TOMTIM]w and wo blocking protein\RAW\TOMTIM-\R_Gomkale_Linden_TOMTIM-_A10.raw;	1	Intra	null	3.14e-09	ILKYVDIGKNEGATLITGGER(3)-IVKEEIFGPVVTVTK(3):0	ALDH4_YEAST	ALDH4_YEAST	sp|P46367|ALDH4_YEAST	sp|P46367|ALDH4_YEAST	sp|P46367|ALDH4_YEAST(377)-sp|P46367|ALDH4_YEAST(419)	29	377	419	13267	8.50307	11085;	File: "Z:\alinden\DATA\2017\06_Jun\170619[Ridhima_TOMTIM]w and wo blocking protein\RAW\TOMTIM-\R_Gomkale_Linden_TOMTIM-_A10.raw"; ID: "11085"; scans: "13267"	246.287
no	DSS	33	1,33	4042.26	1.9895	0	none	Z:\alinden\DATA\2017\06_Jun\170619[Ridhima_TOMTIM]w and wo blocking protein\RAW\TOMTIM-\R_Gomkale_Linden_TOMTIM-_A10.raw;	1	Intra	null	9.01e-15	ILKYVDIGKNEGATLITGGER(3)-IVKEEIFGPVVTVTK(3):0	ALDH4_YEAST	ALDH4_YEAST	sp|P46367|ALDH4_YEAST	sp|P46367|ALDH4_YEAST	sp|P46367|ALDH4_YEAST(377)-sp|P46367|ALDH4_YEAST(419)	29	377	419	13289	14.0453	11106;	File: "Z:\alinden\DATA\2017\06_Jun\170619[Ridhima_TOMTIM]w and wo blocking protein\RAW\TOMTIM-\R_Gomkale_Linden_TOMTIM-_A10.raw"; ID: "11106"; scans: "13289"	491.811
no	DSS	34	1,34	3499.82	-0.01348	0	none	Z:\alinden\DATA\2017\06_Jun\170619[Ridhima_TOMTIM]w and wo blocking protein\RAW\TOMTIM-\R_Gomkale_Linden_TOMTIM-_A10.raw;	1	Intra	null	6.19e-10	YVDIGKNEGATLITGGER(6)-GYFIKPTVFGDVK(5):0	ALDH4_YEAST	ALDH4_YEAST	sp|P46367|ALDH4_YEAST	sp|P46367|ALDH4_YEAST	sp|P46367|ALDH4_YEAST(383)-sp|P46367|ALDH4_YEAST(404)	21	383	404	13307	9.20831	11122;	File: "Z:\alinden\DATA\2017\06_Jun\170619[Ridhima_TOMTIM]w and wo blocking protein\RAW\TOMTIM-\R_Gomkale_Linden_TOMTIM-_A10.raw"; ID: "11122"; scans: "13307"	-3.85053
no	DSS	35	1,35	3499.82	-0.01559	0	none	Z:\alinden\DATA\2017\06_Jun\170619[Ridhima_TOMTIM]w and wo blocking protein\RAW\TOMTIM-\R_Gomkale_Linden_TOMTIM-_A10.raw;	1	Intra	null	2.69e-13	YVDIGKNEGATLITGGER(6)-GYFIKPTVFGDVK(5):0	ALDH4_YEAST	ALDH4_YEAST	sp|P46367|ALDH4_YEAST	sp|P46367|ALDH4_YEAST	sp|P46367|ALDH4_YEAST(383)-sp|P46367|ALDH4_YEAST(404)	21	383	404	13342	12.5702	11155;	File: "Z:\alinden\DATA\2017\06_Jun\170619[Ridhima_TOMTIM]w and wo blocking protein\RAW\TOMTIM-\R_Gomkale_Linden_TOMTIM-_A10.raw"; ID: "11155"; scans: "13342"	-4.45325
no	DSS	36	1,36	5423.68	0.97486	0	none	Z:\alinden\DATA\2017\06_Jun\170619[Ridhima_TOMTIM]w and wo blocking protein\RAW\TOMTIM-\R_Gomkale_Linden_TOMTIM-_A10.raw;	1	Intra	null	2.52e-21	FKSADEVINMANDSEYGLAAGIHTSNINTALK(2)-YVDIGKNEGATLITGGER(6):0	ALDH4_YEAST	ALDH4_YEAST	sp|P46367|ALDH4_YEAST	sp|P46367|ALDH4_YEAST	sp|P46367|ALDH4_YEAST(433)-sp|P46367|ALDH4_YEAST(383)	10	433	383	13353	20.5986	11166;	File: "Z:\alinden\DATA\2017\06_Jun\170619[Ridhima_TOMTIM]w and wo blocking protein\RAW\TOMTIM-\R_Gomkale_Linden_TOMTIM-_A10.raw"; ID: "11166"; scans: "13353"	179.676
no	DSS	37	1,37	3499.82	0.99188	0	none	Z:\alinden\DATA\2017\06_Jun\170619[Ridhima_TOMTIM]w and wo blocking protein\RAW\TOMTIM-\R_Gomkale_Linden_TOMTIM-_A10.raw;	1	Intra	null	3.53e-08	YVDIGKNEGATLITGGER(6)-GYFIKPTVFGDVK(5):0	ALDH4_YEAST	ALDH4_YEAST	sp|P46367|ALDH4_YEAST	sp|P46367|ALDH4_YEAST	sp|P46367|ALDH4_YEAST(383)-sp|P46367|ALDH4_YEAST(404)	21	383	404	13444	7.45223	11251;	File: "Z:\alinden\DATA\2017\06_Jun\170619[Ridhima_TOMTIM]w and wo blocking protein\RAW\TOMTIM-\R_Gomkale_Linden_TOMTIM-_A10.raw"; ID: "11251"; scans: "13444"	283.247
no	DSS	38	1,38	3854.09	3.9906	0	none	Z:\alinden\DATA\2017\06_Jun\170619[Ridhima_TOMTIM]w and wo blocking protein\RAW\TOMTIM-\R_Gomkale_Linden_TOMTIM-_A10.raw;	1	Intra	null	2.3e-16	ILKYVDIGKNEGATLITGGER(3)-GYFIKPTVFGDVK(5):0	ALDH4_YEAST	ALDH4_YEAST	sp|P46367|ALDH4_YEAST	sp|P46367|ALDH4_YEAST	sp|P46367|ALDH4_YEAST(377)-sp|P46367|ALDH4_YEAST(404)	14	377	404	13484	15.6383	11289;	File: "Z:\alinden\DATA\2017\06_Jun\170619[Ridhima_TOMTIM]w and wo blocking protein\RAW\TOMTIM-\R_Gomkale_Linden_TOMTIM-_A10.raw"; ID: "11289"; scans: "13484"	1034.08
no	DSS	39	1,39	3854.09	-0.0112	0	none	Z:\alinden\DATA\2017\06_Jun\170619[Ridhima_TOMTIM]w and wo blocking protein\RAW\TOMTIM-\R_Gomkale_Linden_TOMTIM-_A10.raw;	1	Intra	null	4.08e-12	ILKYVDIGKNEGATLITGGER(3)-GYFIKPTVFGDVK(5):0	ALDH4_YEAST	ALDH4_YEAST	sp|P46367|ALDH4_YEAST	sp|P46367|ALDH4_YEAST	sp|P46367|ALDH4_YEAST(377)-sp|P46367|ALDH4_YEAST(404)	14	377	404	13490	11.3893	11294;	File: "Z:\alinden\DATA\2017\06_Jun\170619[Ridhima_TOMTIM]w and wo blocking protein\RAW\TOMTIM-\R_Gomkale_Linden_TOMTIM-_A10.raw"; ID: "11294"; scans: "13490"	-2.90525
no	DSS	40	1,40	3854.09	0.9879	0	none	Z:\alinden\DATA\2017\06_Jun\170619[Ridhima_TOMTIM]w and wo blocking protein\RAW\TOMTIM-\R_Gomkale_Linden_TOMTIM-_A10.raw;	1	Intra	null	7.63e-09	ILKYVDIGKNEGATLITGGER(3)-GYFIKPTVFGDVK(5):0	ALDH4_YEAST	ALDH4_YEAST	sp|P46367|ALDH4_YEAST	sp|P46367|ALDH4_YEAST	sp|P46367|ALDH4_YEAST(377)-sp|P46367|ALDH4_YEAST(404)	14	377	404	13512	8.11748	11315;	File: "Z:\alinden\DATA\2017\06_Jun\170619[Ridhima_TOMTIM]w and wo blocking protein\RAW\TOMTIM-\R_Gomkale_Linden_TOMTIM-_A10.raw"; ID: "11315"; scans: "13512"	256.193
no	DSS	41	1,41	3926.22	0.99105	0	none	Z:\alinden\DATA\2017\06_Jun\170619[Ridhima_TOMTIM]w and wo blocking protein\RAW\TOMTIM-\R_Gomkale_Linden_TOMTIM-_A10.raw;	1	Intra	null	1.47e-10	IVKEEIFGPVVTVTKFK(15)-LGSKGYFIKPTVFGDVK(4):0	ALDH4_YEAST	ALDH4_YEAST	sp|P46367|ALDH4_YEAST	sp|P46367|ALDH4_YEAST	sp|P46367|ALDH4_YEAST(431)-sp|P46367|ALDH4_YEAST(399)	11	431	399	13550	9.83268	11351;	File: "Z:\alinden\DATA\2017\06_Jun\170619[Ridhima_TOMTIM]w and wo blocking protein\RAW\TOMTIM-\R_Gomkale_Linden_TOMTIM-_A10.raw"; ID: "11351"; scans: "13550"	252.29
no	DSS	42	1,42	3926.22	0.98867	0	none	Z:\alinden\DATA\2017\06_Jun\170619[Ridhima_TOMTIM]w and wo blocking protein\RAW\TOMTIM-\R_Gomkale_Linden_TOMTIM-_A10.raw;	1	Intra	null	2.69e-08	IVKEEIFGPVVTVTKFK(15)-LGSKGYFIKPTVFGDVK(4):0	ALDH4_YEAST	ALDH4_YEAST	sp|P46367|ALDH4_YEAST	sp|P46367|ALDH4_YEAST	sp|P46367|ALDH4_YEAST(431)-sp|P46367|ALDH4_YEAST(399)	11	431	399	13558	7.57025	11358;	File: "Z:\alinden\DATA\2017\06_Jun\170619[Ridhima_TOMTIM]w and wo blocking protein\RAW\TOMTIM-\R_Gomkale_Linden_TOMTIM-_A10.raw"; ID: "11358"; scans: "13558"	251.684
no	DSS	43	1,43	3854.09	2.9967	0	none	Z:\alinden\DATA\2017\06_Jun\170619[Ridhima_TOMTIM]w and wo blocking protein\RAW\TOMTIM-\R_Gomkale_Linden_TOMTIM-_A10.raw;	1	Intra	null	4.72e-15	ILKYVDIGKNEGATLITGGER(3)-GYFIKPTVFGDVK(5):0	ALDH4_YEAST	ALDH4_YEAST	sp|P46367|ALDH4_YEAST	sp|P46367|ALDH4_YEAST	sp|P46367|ALDH4_YEAST(377)-sp|P46367|ALDH4_YEAST(404)	14	377	404	13603	14.3261	11401;	File: "Z:\alinden\DATA\2017\06_Jun\170619[Ridhima_TOMTIM]w and wo blocking protein\RAW\TOMTIM-\R_Gomkale_Linden_TOMTIM-_A10.raw"; ID: "11401"; scans: "13603"	776.731
no	DSS	44	1,44	3716.05	3.00088	0	none	Z:\alinden\DATA\2017\06_Jun\170619[Ridhima_TOMTIM]w and wo blocking protein\RAW\TOMTIM-\R_Gomkale_Linden_TOMTIM-_A10.raw;	1	Intra	null	2.38e-08	SVTAVHKANIMKLGDGLFR(12)-KQLDIYANVALFK(1):0	IDH1_YEAST	IDH1_YEAST	sp|P28834|IDH1_YEAST	sp|P28834|IDH1_YEAST	sp|P28834|IDH1_YEAST(199)-sp|P28834|IDH1_YEAST(110)	2	199	110	13636	7.62342	11432;	File: "Z:\alinden\DATA\2017\06_Jun\170619[Ridhima_TOMTIM]w and wo blocking protein\RAW\TOMTIM-\R_Gomkale_Linden_TOMTIM-_A10.raw"; ID: "11432"; scans: "13636"	806.676
no	DSS	45	1,45	3716.05	1.99705	0	none	Z:\alinden\DATA\2017\06_Jun\170619[Ridhima_TOMTIM]w and wo blocking protein\RAW\TOMTIM-\R_Gomkale_Linden_TOMTIM-_A10.raw;	1	Intra	null	2.13e-05	SVTAVHKANIMKLGDGLFR(12)-KQLDIYANVALFK(1):0	IDH1_YEAST	IDH1_YEAST	sp|P28834|IDH1_YEAST	sp|P28834|IDH1_YEAST	sp|P28834|IDH1_YEAST(199)-sp|P28834|IDH1_YEAST(110)	2	199	110	13640	4.67162	11436;	File: "Z:\alinden\DATA\2017\06_Jun\170619[Ridhima_TOMTIM]w and wo blocking protein\RAW\TOMTIM-\R_Gomkale_Linden_TOMTIM-_A10.raw"; ID: "11436"; scans: "13640"	536.978
no	DSS	46	1,46	3716.05	-0.0105	0	none	Z:\alinden\DATA\2017\06_Jun\170619[Ridhima_TOMTIM]w and wo blocking protein\RAW\TOMTIM-\R_Gomkale_Linden_TOMTIM-_A10.raw;	1	Intra	null	1.64e-08	SVTAVHKANIMKLGDGLFR(7)-KQLDIYANVALFK(1):0	IDH1_YEAST	IDH1_YEAST	sp|P28834|IDH1_YEAST	sp|P28834|IDH1_YEAST	sp|P28834|IDH1_YEAST(194)-sp|P28834|IDH1_YEAST(110)	1	194	110	13682	7.78516	11475;	File: "Z:\alinden\DATA\2017\06_Jun\170619[Ridhima_TOMTIM]w and wo blocking protein\RAW\TOMTIM-\R_Gomkale_Linden_TOMTIM-_A10.raw"; ID: "11475"; scans: "13682"	-2.82482
no	DSS	47	1,47	5252.53	0.98014	0	none	Z:\alinden\DATA\2017\06_Jun\170619[Ridhima_TOMTIM]w and wo blocking protein\RAW\TOMTIM-\R_Gomkale_Linden_TOMTIM-_A10.raw;	1	Intra	null	0.00123	AASESIKVGDPFDESTFQGAQTSQMQLNK(7)-GYFIKPTVFGDVKEDMR(5):0	ALDH4_YEAST	ALDH4_YEAST	sp|P46367|ALDH4_YEAST	sp|P46367|ALDH4_YEAST	sp|P46367|ALDH4_YEAST(352)-sp|P46367|ALDH4_YEAST(404)	14	352	404	13699	2.91009	11491;	File: "Z:\alinden\DATA\2017\06_Jun\170619[Ridhima_TOMTIM]w and wo blocking protein\RAW\TOMTIM-\R_Gomkale_Linden_TOMTIM-_A10.raw"; ID: "11491"; scans: "13699"	186.533
no	DSS	48	1,48	3651.06	-0.01433	0	none	Z:\alinden\DATA\2017\06_Jun\170619[Ridhima_TOMTIM]w and wo blocking protein\RAW\TOMTIM-\R_Gomkale_Linden_TOMTIM-_A10.raw;	1	Intra	null	3.89e-09	LGSKGYFIKPTVFGDVK(4)-IVKEEIFGPVVTVTK(3):0	ALDH4_YEAST	ALDH4_YEAST	sp|P46367|ALDH4_YEAST	sp|P46367|ALDH4_YEAST	sp|P46367|ALDH4_YEAST(399)-sp|P46367|ALDH4_YEAST(419)	26	399	419	13780	8.41005	11567;	File: "Z:\alinden\DATA\2017\06_Jun\170619[Ridhima_TOMTIM]w and wo blocking protein\RAW\TOMTIM-\R_Gomkale_Linden_TOMTIM-_A10.raw"; ID: "11567"; scans: "13780"	-3.92382
no	DSS	49	1,49	3651.06	-0.00853	0	none	Z:\alinden\DATA\2017\06_Jun\170619[Ridhima_TOMTIM]w and wo blocking protein\RAW\TOMTIM-\R_Gomkale_Linden_TOMTIM-_A10.raw;	1	Intra	null	1.86e-16	LGSKGYFIKPTVFGDVK(4)-IVKEEIFGPVVTVTK(3):0	ALDH4_YEAST	ALDH4_YEAST	sp|P46367|ALDH4_YEAST	sp|P46367|ALDH4_YEAST	sp|P46367|ALDH4_YEAST(399)-sp|P46367|ALDH4_YEAST(419)	26	399	419	13783	15.7305	11570;	File: "Z:\alinden\DATA\2017\06_Jun\170619[Ridhima_TOMTIM]w and wo blocking protein\RAW\TOMTIM-\R_Gomkale_Linden_TOMTIM-_A10.raw"; ID: "11570"; scans: "13783"	-2.33567
no	DSS	50	1,50	3813.03	-0.0145	0	none	Z:\alinden\DATA\2017\06_Jun\170619[Ridhima_TOMTIM]w and wo blocking protein\RAW\TOMTIM-\R_Gomkale_Linden_TOMTIM-_A10.raw;	1	Intra	16,M(Oxidation[M]);	1.45e-09	GYFIKPTVFGDVKEDMR(13)-IVKEEIFGPVVTVTK(3):0	ALDH4_YEAST	ALDH4_YEAST	sp|P46367|ALDH4_YEAST	sp|P46367|ALDH4_YEAST	sp|P46367|ALDH4_YEAST(412)-sp|P46367|ALDH4_YEAST(419)	20	412	419	13786	8.83863	11573;	File: "Z:\alinden\DATA\2017\06_Jun\170619[Ridhima_TOMTIM]w and wo blocking protein\RAW\TOMTIM-\R_Gomkale_Linden_TOMTIM-_A10.raw"; ID: "11573"; scans: "13786"	-3.80176
no	DSS	51	1,51	3651.06	-0.01413	0	none	Z:\alinden\DATA\2017\06_Jun\170619[Ridhima_TOMTIM]w and wo blocking protein\RAW\TOMTIM-\R_Gomkale_Linden_TOMTIM-_A10.raw;	1	Intra	null	3.73e-10	LGSKGYFIKPTVFGDVK(4)-IVKEEIFGPVVTVTK(3):0	ALDH4_YEAST	ALDH4_YEAST	sp|P46367|ALDH4_YEAST	sp|P46367|ALDH4_YEAST	sp|P46367|ALDH4_YEAST(399)-sp|P46367|ALDH4_YEAST(419)	26	399	419	13815	9.42829	11600;	File: "Z:\alinden\DATA\2017\06_Jun\170619[Ridhima_TOMTIM]w and wo blocking protein\RAW\TOMTIM-\R_Gomkale_Linden_TOMTIM-_A10.raw"; ID: "11600"; scans: "13815"	-3.86906
no	DSS	52	1,52	3651.06	-0.01017	0	none	Z:\alinden\DATA\2017\06_Jun\170619[Ridhima_TOMTIM]w and wo blocking protein\RAW\TOMTIM-\R_Gomkale_Linden_TOMTIM-_A10.raw;	1	Intra	null	7.6e-12	LGSKGYFIKPTVFGDVK(4)-IVKEEIFGPVVTVTK(3):0	ALDH4_YEAST	ALDH4_YEAST	sp|P46367|ALDH4_YEAST	sp|P46367|ALDH4_YEAST	sp|P46367|ALDH4_YEAST(399)-sp|P46367|ALDH4_YEAST(419)	26	399	419	13904	11.1192	11684;	File: "Z:\alinden\DATA\2017\06_Jun\170619[Ridhima_TOMTIM]w and wo blocking protein\RAW\TOMTIM-\R_Gomkale_Linden_TOMTIM-_A10.raw"; ID: "11684"; scans: "13904"	-2.78473
no	DSS	53	1,53	3651.06	-0.01183	0	none	Z:\alinden\DATA\2017\06_Jun\170619[Ridhima_TOMTIM]w and wo blocking protein\RAW\TOMTIM-\R_Gomkale_Linden_TOMTIM-_A10.raw;	1	Intra	null	2.45e-12	LGSKGYFIKPTVFGDVK(4)-IVKEEIFGPVVTVTK(3):0	ALDH4_YEAST	ALDH4_YEAST	sp|P46367|ALDH4_YEAST	sp|P46367|ALDH4_YEAST	sp|P46367|ALDH4_YEAST(399)-sp|P46367|ALDH4_YEAST(419)	26	399	419	13927	11.6108	11706;	File: "Z:\alinden\DATA\2017\06_Jun\170619[Ridhima_TOMTIM]w and wo blocking protein\RAW\TOMTIM-\R_Gomkale_Linden_TOMTIM-_A10.raw"; ID: "11706"; scans: "13927"	-3.23927
no	DSS	54	1,54	4811.4	-0.00446	0	none	Z:\alinden\DATA\2017\06_Jun\170619[Ridhima_TOMTIM]w and wo blocking protein\RAW\TOMTIM-\R_Gomkale_Linden_TOMTIM-_A10.raw;	1	Intra	null	2.56e-15	VGDPFDESTFQGAQTSQMQLNKILK(22)-YVDIGKNEGATLITGGER(6):0	ALDH4_YEAST	ALDH4_YEAST	sp|P46367|ALDH4_YEAST	sp|P46367|ALDH4_YEAST	sp|P46367|ALDH4_YEAST(374)-sp|P46367|ALDH4_YEAST(383)	17	374	383	13961	14.5918	11738;	File: "Z:\alinden\DATA\2017\06_Jun\170619[Ridhima_TOMTIM]w and wo blocking protein\RAW\TOMTIM-\R_Gomkale_Linden_TOMTIM-_A10.raw"; ID: "11738"; scans: "13961"	-0.926773
no	DSS	55	1,55	4737.32	0.97536	0	none	Z:\alinden\DATA\2017\06_Jun\170619[Ridhima_TOMTIM]w and wo blocking protein\RAW\TOMTIM-\R_Gomkale_Linden_TOMTIM-_A10.raw;	1	Intra	25,M(Oxidation[M]);	1.65e-13	AASESIKVGDPFDESTFQGAQTSQMQLNK(7)-GYFIKPTVFGDVK(5):0	ALDH4_YEAST	ALDH4_YEAST	sp|P46367|ALDH4_YEAST	sp|P46367|ALDH4_YEAST	sp|P46367|ALDH4_YEAST(352)-sp|P46367|ALDH4_YEAST(404)	14	352	404	13997	12.7825	11772;	File: "Z:\alinden\DATA\2017\06_Jun\170619[Ridhima_TOMTIM]w and wo blocking protein\RAW\TOMTIM-\R_Gomkale_Linden_TOMTIM-_A10.raw"; ID: "11772"; scans: "13997"	205.803
no	DSS	56	1,56	4811.4	1.98678	0	none	Z:\alinden\DATA\2017\06_Jun\170619[Ridhima_TOMTIM]w and wo blocking protein\RAW\TOMTIM-\R_Gomkale_Linden_TOMTIM-_A10.raw;	1	Intra	null	1.05e-15	VGDPFDESTFQGAQTSQMQLNKILK(22)-YVDIGKNEGATLITGGER(6):0	ALDH4_YEAST	ALDH4_YEAST	sp|P46367|ALDH4_YEAST	sp|P46367|ALDH4_YEAST	sp|P46367|ALDH4_YEAST(374)-sp|P46367|ALDH4_YEAST(383)	17	374	383	14102	14.9788	11871;	File: "Z:\alinden\DATA\2017\06_Jun\170619[Ridhima_TOMTIM]w and wo blocking protein\RAW\TOMTIM-\R_Gomkale_Linden_TOMTIM-_A10.raw"; ID: "11871"; scans: "14102"	412.675
no	DSS	57	1,57	4811.4	0.99166	0	none	Z:\alinden\DATA\2017\06_Jun\170619[Ridhima_TOMTIM]w and wo blocking protein\RAW\TOMTIM-\R_Gomkale_Linden_TOMTIM-_A10.raw;	1	Intra	null	1.42e-10	VGDPFDESTFQGAQTSQMQLNKILK(22)-YVDIGKNEGATLITGGER(6):0	ALDH4_YEAST	ALDH4_YEAST	sp|P46367|ALDH4_YEAST	sp|P46367|ALDH4_YEAST	sp|P46367|ALDH4_YEAST(374)-sp|P46367|ALDH4_YEAST(383)	17	374	383	14143	9.84771	11910;	File: "Z:\alinden\DATA\2017\06_Jun\170619[Ridhima_TOMTIM]w and wo blocking protein\RAW\TOMTIM-\R_Gomkale_Linden_TOMTIM-_A10.raw"; ID: "11910"; scans: "14143"	206.021
no	DSS	58	1,58	4909.49	0.01687	0	none	Z:\alinden\DATA\2017\06_Jun\170619[Ridhima_TOMTIM]w and wo blocking protein\RAW\TOMTIM-\R_Gomkale_Linden_TOMTIM-_A10.raw;	1	Intra	null	3.45e-16	AASESIKVGDPFDESTFQGAQTSQMQLNK(7)-IVKEEIFGPVVTVTK(3):0	ALDH4_YEAST	ALDH4_YEAST	sp|P46367|ALDH4_YEAST	sp|P46367|ALDH4_YEAST	sp|P46367|ALDH4_YEAST(352)-sp|P46367|ALDH4_YEAST(419)	3	352	419	14341	15.4622	12097;	File: "Z:\alinden\DATA\2017\06_Jun\170619[Ridhima_TOMTIM]w and wo blocking protein\RAW\TOMTIM-\R_Gomkale_Linden_TOMTIM-_A10.raw"; ID: "12097"; scans: "14341"	3.43548
no	DSS	59	1,59	4072.2	1.99303	0	none	Z:\alinden\DATA\2017\06_Jun\170619[Ridhima_TOMTIM]w and wo blocking protein\RAW\TOMTIM-\R_Gomkale_Linden_TOMTIM-_A10.raw;	1	Intra	null	1.07e-09	GYFIKPTVFGDVKEDMR(13)-IVKEEIFGPVVTVTKFK(15):0	ALDH4_YEAST	ALDH4_YEAST	sp|P46367|ALDH4_YEAST	sp|P46367|ALDH4_YEAST	sp|P46367|ALDH4_YEAST(412)-sp|P46367|ALDH4_YEAST(431)	18	412	431	14456	8.97062	12206;	File: "Z:\alinden\DATA\2017\06_Jun\170619[Ridhima_TOMTIM]w and wo blocking protein\RAW\TOMTIM-\R_Gomkale_Linden_TOMTIM-_A10.raw"; ID: "12206"; scans: "14456"	489.063
no	DSS	60	1,60	4721.32	0.00103	0	none	Z:\alinden\DATA\2017\06_Jun\170619[Ridhima_TOMTIM]w and wo blocking protein\RAW\TOMTIM-\R_Gomkale_Linden_TOMTIM-_A10.raw;	1	Intra	null	1.95e-08	AASESIKVGDPFDESTFQGAQTSQMQLNK(7)-GYFIKPTVFGDVK(5):0	ALDH4_YEAST	ALDH4_YEAST	sp|P46367|ALDH4_YEAST	sp|P46367|ALDH4_YEAST	sp|P46367|ALDH4_YEAST(352)-sp|P46367|ALDH4_YEAST(404)	14	352	404	14488	7.70997	12236;	File: "Z:\alinden\DATA\2017\06_Jun\170619[Ridhima_TOMTIM]w and wo blocking protein\RAW\TOMTIM-\R_Gomkale_Linden_TOMTIM-_A10.raw"; ID: "12236"; scans: "14488"	0.218113
no	DSS	61	1,61	4072.2	3.00803	0	none	Z:\alinden\DATA\2017\06_Jun\170619[Ridhima_TOMTIM]w and wo blocking protein\RAW\TOMTIM-\R_Gomkale_Linden_TOMTIM-_A10.raw;	1	Intra	null	1.48e-06	GYFIKPTVFGDVKEDMR(13)-IVKEEIFGPVVTVTKFK(15):0	ALDH4_YEAST	ALDH4_YEAST	sp|P46367|ALDH4_YEAST	sp|P46367|ALDH4_YEAST	sp|P46367|ALDH4_YEAST(412)-sp|P46367|ALDH4_YEAST(431)	18	412	431	14490	5.82974	12238;	File: "Z:\alinden\DATA\2017\06_Jun\170619[Ridhima_TOMTIM]w and wo blocking protein\RAW\TOMTIM-\R_Gomkale_Linden_TOMTIM-_A10.raw"; ID: "12238"; scans: "14490"	737.947
no	DSS	62	1,62	4072.2	0.00992	0	none	Z:\alinden\DATA\2017\06_Jun\170619[Ridhima_TOMTIM]w and wo blocking protein\RAW\TOMTIM-\R_Gomkale_Linden_TOMTIM-_A10.raw;	1	Intra	null	4.3e-11	GYFIKPTVFGDVKEDMR(13)-IVKEEIFGPVVTVTKFK(15):0	ALDH4_YEAST	ALDH4_YEAST	sp|P46367|ALDH4_YEAST	sp|P46367|ALDH4_YEAST	sp|P46367|ALDH4_YEAST(412)-sp|P46367|ALDH4_YEAST(431)	18	412	431	14515	10.3665	12261;	File: "Z:\alinden\DATA\2017\06_Jun\170619[Ridhima_TOMTIM]w and wo blocking protein\RAW\TOMTIM-\R_Gomkale_Linden_TOMTIM-_A10.raw"; ID: "12261"; scans: "14515"	2.43542
no	DSS	63	1,63	4072.2	0.00941	0	none	Z:\alinden\DATA\2017\06_Jun\170619[Ridhima_TOMTIM]w and wo blocking protein\RAW\TOMTIM-\R_Gomkale_Linden_TOMTIM-_A10.raw;	1	Intra	null	5.33e-08	GYFIKPTVFGDVKEDMR(13)-IVKEEIFGPVVTVTKFK(15):0	ALDH4_YEAST	ALDH4_YEAST	sp|P46367|ALDH4_YEAST	sp|P46367|ALDH4_YEAST	sp|P46367|ALDH4_YEAST(412)-sp|P46367|ALDH4_YEAST(431)	18	412	431	14534	7.27327	12279;	File: "Z:\alinden\DATA\2017\06_Jun\170619[Ridhima_TOMTIM]w and wo blocking protein\RAW\TOMTIM-\R_Gomkale_Linden_TOMTIM-_A10.raw"; ID: "12279"; scans: "14534"	2.31021
no	DSS	64	1,64	4072.2	1.01305	0	none	Z:\alinden\DATA\2017\06_Jun\170619[Ridhima_TOMTIM]w and wo blocking protein\RAW\TOMTIM-\R_Gomkale_Linden_TOMTIM-_A10.raw;	1	Intra	null	2.16e-10	GYFIKPTVFGDVKEDMR(13)-IVKEEIFGPVVTVTKFK(15):0	ALDH4_YEAST	ALDH4_YEAST	sp|P46367|ALDH4_YEAST	sp|P46367|ALDH4_YEAST	sp|P46367|ALDH4_YEAST(412)-sp|P46367|ALDH4_YEAST(431)	18	412	431	14593	9.66555	12335;	File: "Z:\alinden\DATA\2017\06_Jun\170619[Ridhima_TOMTIM]w and wo blocking protein\RAW\TOMTIM-\R_Gomkale_Linden_TOMTIM-_A10.raw"; ID: "12335"; scans: "14593"	248.649
no	DSS	65	1,65	4072.2	0.01393	0	none	Z:\alinden\DATA\2017\06_Jun\170619[Ridhima_TOMTIM]w and wo blocking protein\RAW\TOMTIM-\R_Gomkale_Linden_TOMTIM-_A10.raw;	1	Intra	null	2.92e-07	GYFIKPTVFGDVKEDMR(13)-IVKEEIFGPVVTVTKFK(15):0	ALDH4_YEAST	ALDH4_YEAST	sp|P46367|ALDH4_YEAST	sp|P46367|ALDH4_YEAST	sp|P46367|ALDH4_YEAST(412)-sp|P46367|ALDH4_YEAST(431)	18	412	431	14624	6.53462	12364;	File: "Z:\alinden\DATA\2017\06_Jun\170619[Ridhima_TOMTIM]w and wo blocking protein\RAW\TOMTIM-\R_Gomkale_Linden_TOMTIM-_A10.raw"; ID: "12364"; scans: "14624"	3.4199
no	DSS	66	1,66	5532.72	-0.00501	0	none	Z:\alinden\DATA\2017\06_Jun\170619[Ridhima_TOMTIM]w and wo blocking protein\RAW\TOMTIM-\R_Gomkale_Linden_TOMTIM-_A10.raw;	1	Intra	null	3.91e-09	FKSADEVINMANDSEYGLAAGIHTSNINTALK(2)-GYFIKPTVFGDVKEDMR(13):0	ALDH4_YEAST	ALDH4_YEAST	sp|P46367|ALDH4_YEAST	sp|P46367|ALDH4_YEAST	sp|P46367|ALDH4_YEAST(433)-sp|P46367|ALDH4_YEAST(412)	12	433	412	14635	8.40782	12375;	File: "Z:\alinden\DATA\2017\06_Jun\170619[Ridhima_TOMTIM]w and wo blocking protein\RAW\TOMTIM-\R_Gomkale_Linden_TOMTIM-_A10.raw"; ID: "12375"; scans: "14635"	-0.905358
no	DSS	67	1,67	4774.46	-0.00238	0	none	Z:\alinden\DATA\2017\06_Jun\170619[Ridhima_TOMTIM]w and wo blocking protein\RAW\TOMTIM-\R_Gomkale_Linden_TOMTIM-_A10.raw;	1	Intra	null	3.27e-10	VGDPFDESTFQGAQTSQMQLNKILK(22)-LGSKGYFIKPTVFGDVK(4):0	ALDH4_YEAST	ALDH4_YEAST	sp|P46367|ALDH4_YEAST	sp|P46367|ALDH4_YEAST	sp|P46367|ALDH4_YEAST(374)-sp|P46367|ALDH4_YEAST(399)	8	374	399	14641	9.48545	12380;	File: "Z:\alinden\DATA\2017\06_Jun\170619[Ridhima_TOMTIM]w and wo blocking protein\RAW\TOMTIM-\R_Gomkale_Linden_TOMTIM-_A10.raw"; ID: "12380"; scans: "14641"	-0.498381
no	DSS	68	1,68	5532.72	0.00528	0	none	Z:\alinden\DATA\2017\06_Jun\170619[Ridhima_TOMTIM]w and wo blocking protein\RAW\TOMTIM-\R_Gomkale_Linden_TOMTIM-_A10.raw;	1	Intra	null	8.81e-11	FKSADEVINMANDSEYGLAAGIHTSNINTALK(2)-GYFIKPTVFGDVKEDMR(13):0	ALDH4_YEAST	ALDH4_YEAST	sp|P46367|ALDH4_YEAST	sp|P46367|ALDH4_YEAST	sp|P46367|ALDH4_YEAST(433)-sp|P46367|ALDH4_YEAST(412)	12	433	412	14642	10.055	12381;	File: "Z:\alinden\DATA\2017\06_Jun\170619[Ridhima_TOMTIM]w and wo blocking protein\RAW\TOMTIM-\R_Gomkale_Linden_TOMTIM-_A10.raw"; ID: "12381"; scans: "14642"	0.954148
no	DSS	69	1,69	4811.4	1.0107	0	none	Z:\alinden\DATA\2017\06_Jun\170619[Ridhima_TOMTIM]w and wo blocking protein\RAW\TOMTIM-\R_Gomkale_Linden_TOMTIM-_A10.raw;	1	Intra	null	3.33e-08	VGDPFDESTFQGAQTSQMQLNKILK(22)-YVDIGKNEGATLITGGER(6):0	ALDH4_YEAST	ALDH4_YEAST	sp|P46367|ALDH4_YEAST	sp|P46367|ALDH4_YEAST	sp|P46367|ALDH4_YEAST(374)-sp|P46367|ALDH4_YEAST(383)	17	374	383	14648	7.47756	12387;	File: "Z:\alinden\DATA\2017\06_Jun\170619[Ridhima_TOMTIM]w and wo blocking protein\RAW\TOMTIM-\R_Gomkale_Linden_TOMTIM-_A10.raw"; ID: "12387"; scans: "14648"	209.976
no	DSS	70	1,70	4721.32	0.00591	0	none	Z:\alinden\DATA\2017\06_Jun\170619[Ridhima_TOMTIM]w and wo blocking protein\RAW\TOMTIM-\R_Gomkale_Linden_TOMTIM-_A10.raw;	1	Intra	null	1.99e-09	AASESIKVGDPFDESTFQGAQTSQMQLNK(7)-GYFIKPTVFGDVK(5):0	ALDH4_YEAST	ALDH4_YEAST	sp|P46367|ALDH4_YEAST	sp|P46367|ALDH4_YEAST	sp|P46367|ALDH4_YEAST(352)-sp|P46367|ALDH4_YEAST(404)	14	352	404	14663	8.70115	12401;	File: "Z:\alinden\DATA\2017\06_Jun\170619[Ridhima_TOMTIM]w and wo blocking protein\RAW\TOMTIM-\R_Gomkale_Linden_TOMTIM-_A10.raw"; ID: "12401"; scans: "14663"	1.2515
no	DSS	71	1,71	4774.46	2.01229	0	none	Z:\alinden\DATA\2017\06_Jun\170619[Ridhima_TOMTIM]w and wo blocking protein\RAW\TOMTIM-\R_Gomkale_Linden_TOMTIM-_A10.raw;	1	Intra	null	5.08e-08	VGDPFDESTFQGAQTSQMQLNKILK(22)-LGSKGYFIKPTVFGDVK(4):0	ALDH4_YEAST	ALDH4_YEAST	sp|P46367|ALDH4_YEAST	sp|P46367|ALDH4_YEAST	sp|P46367|ALDH4_YEAST(374)-sp|P46367|ALDH4_YEAST(399)	8	374	399	14686	7.29414	12423;	File: "Z:\alinden\DATA\2017\06_Jun\170619[Ridhima_TOMTIM]w and wo blocking protein\RAW\TOMTIM-\R_Gomkale_Linden_TOMTIM-_A10.raw"; ID: "12423"; scans: "14686"	421.204
no	DSS	72	1,72	4774.46	1.01477	0	none	Z:\alinden\DATA\2017\06_Jun\170619[Ridhima_TOMTIM]w and wo blocking protein\RAW\TOMTIM-\R_Gomkale_Linden_TOMTIM-_A10.raw;	1	Intra	null	0.00039	VGDPFDESTFQGAQTSQMQLNKILK(22)-LGSKGYFIKPTVFGDVK(4):0	ALDH4_YEAST	ALDH4_YEAST	sp|P46367|ALDH4_YEAST	sp|P46367|ALDH4_YEAST	sp|P46367|ALDH4_YEAST(374)-sp|P46367|ALDH4_YEAST(399)	8	374	399	14813	3.40894	12543;	File: "Z:\alinden\DATA\2017\06_Jun\170619[Ridhima_TOMTIM]w and wo blocking protein\RAW\TOMTIM-\R_Gomkale_Linden_TOMTIM-_A10.raw"; ID: "12543"; scans: "14813"	212.451
no	DSS	73	1,73	3797.04	-0.01223	0	none	Z:\alinden\DATA\2017\06_Jun\170619[Ridhima_TOMTIM]w and wo blocking protein\RAW\TOMTIM-\R_Gomkale_Linden_TOMTIM-_A10.raw;	1	Intra	null	2.06e-13	GYFIKPTVFGDVKEDMR(13)-IVKEEIFGPVVTVTK(3):0	ALDH4_YEAST	ALDH4_YEAST	sp|P46367|ALDH4_YEAST	sp|P46367|ALDH4_YEAST	sp|P46367|ALDH4_YEAST(412)-sp|P46367|ALDH4_YEAST(419)	20	412	419	14894	12.6861	12619;	File: "Z:\alinden\DATA\2017\06_Jun\170619[Ridhima_TOMTIM]w and wo blocking protein\RAW\TOMTIM-\R_Gomkale_Linden_TOMTIM-_A10.raw"; ID: "12619"; scans: "14894"	-3.22009
no	DSS	74	1,74	3797.04	0.00614	0	none	Z:\alinden\DATA\2017\06_Jun\170619[Ridhima_TOMTIM]w and wo blocking protein\RAW\TOMTIM-\R_Gomkale_Linden_TOMTIM-_A10.raw;	1	Intra	null	1.15e-16	GYFIKPTVFGDVKEDMR(13)-IVKEEIFGPVVTVTK(3):0	ALDH4_YEAST	ALDH4_YEAST	sp|P46367|ALDH4_YEAST	sp|P46367|ALDH4_YEAST	sp|P46367|ALDH4_YEAST(412)-sp|P46367|ALDH4_YEAST(419)	20	412	419	14957	15.9393	12679;	File: "Z:\alinden\DATA\2017\06_Jun\170619[Ridhima_TOMTIM]w and wo blocking protein\RAW\TOMTIM-\R_Gomkale_Linden_TOMTIM-_A10.raw"; ID: "12679"; scans: "14957"	1.61662
no	DSS	75	1,75	3797.04	0.0009	0	none	Z:\alinden\DATA\2017\06_Jun\170619[Ridhima_TOMTIM]w and wo blocking protein\RAW\TOMTIM-\R_Gomkale_Linden_TOMTIM-_A10.raw;	1	Intra	null	2.69e-10	GYFIKPTVFGDVKEDMR(13)-IVKEEIFGPVVTVTK(3):0	ALDH4_YEAST	ALDH4_YEAST	sp|P46367|ALDH4_YEAST	sp|P46367|ALDH4_YEAST	sp|P46367|ALDH4_YEAST(412)-sp|P46367|ALDH4_YEAST(419)	20	412	419	14966	9.57025	12687;	File: "Z:\alinden\DATA\2017\06_Jun\170619[Ridhima_TOMTIM]w and wo blocking protein\RAW\TOMTIM-\R_Gomkale_Linden_TOMTIM-_A10.raw"; ID: "12687"; scans: "14966"	0.236964
no	DSS	76	1,76	3797.04	0.00467	0	none	Z:\alinden\DATA\2017\06_Jun\170619[Ridhima_TOMTIM]w and wo blocking protein\RAW\TOMTIM-\R_Gomkale_Linden_TOMTIM-_A10.raw;	1	Intra	null	1.42e-20	GYFIKPTVFGDVKEDMR(13)-IVKEEIFGPVVTVTK(3):0	ALDH4_YEAST	ALDH4_YEAST	sp|P46367|ALDH4_YEAST	sp|P46367|ALDH4_YEAST	sp|P46367|ALDH4_YEAST(412)-sp|P46367|ALDH4_YEAST(419)	20	412	419	15006	19.8477	12725;	File: "Z:\alinden\DATA\2017\06_Jun\170619[Ridhima_TOMTIM]w and wo blocking protein\RAW\TOMTIM-\R_Gomkale_Linden_TOMTIM-_A10.raw"; ID: "12725"; scans: "15006"	1.22958
no	DSS	77	1,77	3797.04	0.00533	0	none	Z:\alinden\DATA\2017\06_Jun\170619[Ridhima_TOMTIM]w and wo blocking protein\RAW\TOMTIM-\R_Gomkale_Linden_TOMTIM-_A10.raw;	1	Intra	null	4.87e-11	GYFIKPTVFGDVKEDMR(13)-IVKEEIFGPVVTVTK(3):0	ALDH4_YEAST	ALDH4_YEAST	sp|P46367|ALDH4_YEAST	sp|P46367|ALDH4_YEAST	sp|P46367|ALDH4_YEAST(412)-sp|P46367|ALDH4_YEAST(419)	20	412	419	15021	10.3125	12739;	File: "Z:\alinden\DATA\2017\06_Jun\170619[Ridhima_TOMTIM]w and wo blocking protein\RAW\TOMTIM-\R_Gomkale_Linden_TOMTIM-_A10.raw"; ID: "12739"; scans: "15021"	1.40335
no	DSS	78	1,78	4270.25	2.99122	0	none	Z:\alinden\DATA\2017\06_Jun\170619[Ridhima_TOMTIM]w and wo blocking protein\RAW\TOMTIM-\R_Gomkale_Linden_TOMTIM-_A10.raw;	1	Inter	null	0.000727	GVNLPGTDVDLPALSEKDKEDLR(19)-GGIIHFEVSPKNINK(11):0	KPYK1_YEAST	ILVB_YEAST	sp|P00549|KPYK1_YEAST	sp|P07342|ILVB_YEAST	sp|P00549|KPYK1_YEAST(196)-sp|P07342|ILVB_YEAST(411)	1	196	411	15026	3.13847	12744;	File: "Z:\alinden\DATA\2017\06_Jun\170619[Ridhima_TOMTIM]w and wo blocking protein\RAW\TOMTIM-\R_Gomkale_Linden_TOMTIM-_A10.raw"; ID: "12744"; scans: "15026"	699.824
no	DSS	80	1,80	3797.04	1.022	0	none	Z:\alinden\DATA\2017\06_Jun\170619[Ridhima_TOMTIM]w and wo blocking protein\RAW\TOMTIM-\R_Gomkale_Linden_TOMTIM-_A10.raw;	1	Intra	null	1.8e-11	GYFIKPTVFGDVKEDMR(5)-IVKEEIFGPVVTVTK(3):0	ALDH4_YEAST	ALDH4_YEAST	sp|P46367|ALDH4_YEAST	sp|P46367|ALDH4_YEAST	sp|P46367|ALDH4_YEAST(404)-sp|P46367|ALDH4_YEAST(419)	9	404	419	15135	10.7447	12846;	File: "Z:\alinden\DATA\2017\06_Jun\170619[Ridhima_TOMTIM]w and wo blocking protein\RAW\TOMTIM-\R_Gomkale_Linden_TOMTIM-_A10.raw"; ID: "12846"; scans: "15135"	269.014
no	DSS	81	1,81	3797.04	-0.00567	0	none	Z:\alinden\DATA\2017\06_Jun\170619[Ridhima_TOMTIM]w and wo blocking protein\RAW\TOMTIM-\R_Gomkale_Linden_TOMTIM-_A10.raw;	1	Intra	null	1.51e-15	GYFIKPTVFGDVKEDMR(5)-IVKEEIFGPVVTVTK(3):0	ALDH4_YEAST	ALDH4_YEAST	sp|P46367|ALDH4_YEAST	sp|P46367|ALDH4_YEAST	sp|P46367|ALDH4_YEAST(404)-sp|P46367|ALDH4_YEAST(419)	9	404	419	15205	14.821	12912;	File: "Z:\alinden\DATA\2017\06_Jun\170619[Ridhima_TOMTIM]w and wo blocking protein\RAW\TOMTIM-\R_Gomkale_Linden_TOMTIM-_A10.raw"; ID: "12912"; scans: "15205"	-1.49288
no	DSS	82	1,82	4109.11	3.00702	0	none	Z:\alinden\DATA\2017\06_Jun\170619[Ridhima_TOMTIM]w and wo blocking protein\RAW\TOMTIM-\R_Gomkale_Linden_TOMTIM-_A10.raw;	1	Intra	null	4.96e-07	AVLEGKYDNIPEHAFYMVGGIEDVVAK(6)-LKDTVASFK(2):0	ATPB_YEAST	ATPB_YEAST	sp|P00830|ATPB_YEAST	sp|P00830|ATPB_YEAST	sp|P00830|ATPB_YEAST(481)-sp|P00830|ATPB_YEAST(468)	5	481	468	15213	6.30452	12920;	File: "Z:\alinden\DATA\2017\06_Jun\170619[Ridhima_TOMTIM]w and wo blocking protein\RAW\TOMTIM-\R_Gomkale_Linden_TOMTIM-_A10.raw"; ID: "12920"; scans: "15213"	731.08
no	DSS	83	1,83	4109.11	0.00894	0	none	Z:\alinden\DATA\2017\06_Jun\170619[Ridhima_TOMTIM]w and wo blocking protein\RAW\TOMTIM-\R_Gomkale_Linden_TOMTIM-_A10.raw;	1	Intra	null	5.72e-08	AVLEGKYDNIPEHAFYMVGGIEDVVAK(6)-LKDTVASFK(2):0	ATPB_YEAST	ATPB_YEAST	sp|P00830|ATPB_YEAST	sp|P00830|ATPB_YEAST	sp|P00830|ATPB_YEAST(481)-sp|P00830|ATPB_YEAST(468)	5	481	468	15225	7.2426	12931;	File: "Z:\alinden\DATA\2017\06_Jun\170619[Ridhima_TOMTIM]w and wo blocking protein\RAW\TOMTIM-\R_Gomkale_Linden_TOMTIM-_A10.raw"; ID: "12931"; scans: "15225"	2.17512
no	DSS	84	1,84	3797.04	1.00919	0	none	Z:\alinden\DATA\2017\06_Jun\170619[Ridhima_TOMTIM]w and wo blocking protein\RAW\TOMTIM-\R_Gomkale_Linden_TOMTIM-_A10.raw;	1	Intra	null	1.39e-16	GYFIKPTVFGDVKEDMR(5)-IVKEEIFGPVVTVTK(3):0	ALDH4_YEAST	ALDH4_YEAST	sp|P46367|ALDH4_YEAST	sp|P46367|ALDH4_YEAST	sp|P46367|ALDH4_YEAST(404)-sp|P46367|ALDH4_YEAST(419)	9	404	419	15278	15.857	12981;	File: "Z:\alinden\DATA\2017\06_Jun\170619[Ridhima_TOMTIM]w and wo blocking protein\RAW\TOMTIM-\R_Gomkale_Linden_TOMTIM-_A10.raw"; ID: "12981"; scans: "15278"	265.643
no	DSS	85	1,85	3713.88	1.0047	0	none	Z:\alinden\DATA\2017\06_Jun\170619[Ridhima_TOMTIM]w and wo blocking protein\RAW\TOMTIM-\R_Gomkale_Linden_TOMTIM-_A10.raw;	1	Intra	null	6.37e-16	DKIDLLFEENNFKPFK(13)-NFDKMAQIPNFQK(4):0	NDI1_YEAST	NDI1_YEAST	sp|P32340|NDI1_YEAST	sp|P32340|NDI1_YEAST	sp|P32340|NDI1_YEAST(437)-sp|P32340|NDI1_YEAST(409)	8	437	409	15330	15.1959	13030;	File: "Z:\alinden\DATA\2017\06_Jun\170619[Ridhima_TOMTIM]w and wo blocking protein\RAW\TOMTIM-\R_Gomkale_Linden_TOMTIM-_A10.raw"; ID: "13030"; scans: "15330"	270.379
no	DSS	86	1,86	3713.88	0.01231	0	none	Z:\alinden\DATA\2017\06_Jun\170619[Ridhima_TOMTIM]w and wo blocking protein\RAW\TOMTIM-\R_Gomkale_Linden_TOMTIM-_A10.raw;	1	Intra	null	2.9e-08	DKIDLLFEENNFKPFK(13)-NFDKMAQIPNFQK(4):0	NDI1_YEAST	NDI1_YEAST	sp|P32340|NDI1_YEAST	sp|P32340|NDI1_YEAST	sp|P32340|NDI1_YEAST(437)-sp|P32340|NDI1_YEAST(409)	8	437	409	15343	7.5376	13042;	File: "Z:\alinden\DATA\2017\06_Jun\170619[Ridhima_TOMTIM]w and wo blocking protein\RAW\TOMTIM-\R_Gomkale_Linden_TOMTIM-_A10.raw"; ID: "13042"; scans: "15343"	3.31368
no	DSS	87	1,87	3797.04	0.01853	0	none	Z:\alinden\DATA\2017\06_Jun\170619[Ridhima_TOMTIM]w and wo blocking protein\RAW\TOMTIM-\R_Gomkale_Linden_TOMTIM-_A10.raw;	1	Intra	null	7.29e-09	GYFIKPTVFGDVKEDMR(5)-IVKEEIFGPVVTVTK(3):0	ALDH4_YEAST	ALDH4_YEAST	sp|P46367|ALDH4_YEAST	sp|P46367|ALDH4_YEAST	sp|P46367|ALDH4_YEAST(404)-sp|P46367|ALDH4_YEAST(419)	9	404	419	15344	8.13727	13043;	File: "Z:\alinden\DATA\2017\06_Jun\170619[Ridhima_TOMTIM]w and wo blocking protein\RAW\TOMTIM-\R_Gomkale_Linden_TOMTIM-_A10.raw"; ID: "13043"; scans: "15344"	4.8788
no	DSS	88	1,88	4920.44	3.015	0	none	Z:\alinden\DATA\2017\06_Jun\170619[Ridhima_TOMTIM]w and wo blocking protein\RAW\TOMTIM-\R_Gomkale_Linden_TOMTIM-_A10.raw;	1	Intra	null	0.000199	VGDPFDESTFQGAQTSQMQLNKILK(22)-GYFIKPTVFGDVKEDMR(13):0	ALDH4_YEAST	ALDH4_YEAST	sp|P46367|ALDH4_YEAST	sp|P46367|ALDH4_YEAST	sp|P46367|ALDH4_YEAST(374)-sp|P46367|ALDH4_YEAST(412)	2	374	412	15388	3.70115	13085;	File: "Z:\alinden\DATA\2017\06_Jun\170619[Ridhima_TOMTIM]w and wo blocking protein\RAW\TOMTIM-\R_Gomkale_Linden_TOMTIM-_A10.raw"; ID: "13085"; scans: "15388"	612.25
no	DSS	89	1,89	4593.39	1.01577	0	none	Z:\alinden\DATA\2017\06_Jun\170619[Ridhima_TOMTIM]w and wo blocking protein\RAW\TOMTIM-\R_Gomkale_Linden_TOMTIM-_A10.raw;	1	Intra	18,M(Oxidation[M]);	4.04e-13	VGDPFDESTFQGAQTSQMQLNKILK(22)-IVKEEIFGPVVTVTK(3):0	ALDH4_YEAST	ALDH4_YEAST	sp|P46367|ALDH4_YEAST	sp|P46367|ALDH4_YEAST	sp|P46367|ALDH4_YEAST(374)-sp|P46367|ALDH4_YEAST(419)	12	374	419	15503	12.3936	13193;	File: "Z:\alinden\DATA\2017\06_Jun\170619[Ridhima_TOMTIM]w and wo blocking protein\RAW\TOMTIM-\R_Gomkale_Linden_TOMTIM-_A10.raw"; ID: "13193"; scans: "15503"	221.04
no	DSS	90	1,90	3536.88	1.00795	0	none	Z:\alinden\DATA\2017\06_Jun\170619[Ridhima_TOMTIM]w and wo blocking protein\RAW\TOMTIM-\R_Gomkale_Linden_TOMTIM-_A10.raw;	1	Intra	null	2.04e-06	VSLQDIKDFADKVYTK(12)-KGLGNPLLYDGVER(1):0	QCR2_YEAST	QCR2_YEAST	sp|P07257|QCR2_YEAST	sp|P07257|QCR2_YEAST	sp|P07257|QCR2_YEAST(178)-sp|P07257|QCR2_YEAST(153)	1	178	153	15543	5.69037	13231;	File: "Z:\alinden\DATA\2017\06_Jun\170619[Ridhima_TOMTIM]w and wo blocking protein\RAW\TOMTIM-\R_Gomkale_Linden_TOMTIM-_A10.raw"; ID: "13231"; scans: "15543"	284.821
no	DSS	91	1,91	6182.04	4.01452	0	none	Z:\alinden\DATA\2017\06_Jun\170619[Ridhima_TOMTIM]w and wo blocking protein\RAW\TOMTIM-\R_Gomkale_Linden_TOMTIM-_A10.raw;	1	Intra	null	1.11e-08	ELSLKQSLGFEPNINNIISGPGGMHVDTAR(5)-MSWLFGDKTPTDDANAAVGGQDTTKPK(25):0	TIM23_YEAST	TIM23_YEAST	sp|P32897|TIM23_YEAST	sp|P32897|TIM23_YEAST	sp|P32897|TIM23_YEAST(32)-sp|P32897|TIM23_YEAST(25)	14	32	25	15550	7.95468	13238;	File: "Z:\alinden\DATA\2017\06_Jun\170619[Ridhima_TOMTIM]w and wo blocking protein\RAW\TOMTIM-\R_Gomkale_Linden_TOMTIM-_A10.raw"; ID: "13238"; scans: "15550"	648.858
no	DSS	92	1,92	6182.04	3.00664	0	none	Z:\alinden\DATA\2017\06_Jun\170619[Ridhima_TOMTIM]w and wo blocking protein\RAW\TOMTIM-\R_Gomkale_Linden_TOMTIM-_A10.raw;	1	Intra	null	8.12e-09	ELSLKQSLGFEPNINNIISGPGGMHVDTAR(5)-MSWLFGDKTPTDDANAAVGGQDTTKPK(25):0	TIM23_YEAST	TIM23_YEAST	sp|P32897|TIM23_YEAST	sp|P32897|TIM23_YEAST	sp|P32897|TIM23_YEAST(32)-sp|P32897|TIM23_YEAST(25)	14	32	25	15551	8.09044	13239;	File: "Z:\alinden\DATA\2017\06_Jun\170619[Ridhima_TOMTIM]w and wo blocking protein\RAW\TOMTIM-\R_Gomkale_Linden_TOMTIM-_A10.raw"; ID: "13239"; scans: "15551"	486.035
no	DSS	93	1,93	5398.87	0.99875	0	none	Z:\alinden\DATA\2017\06_Jun\170619[Ridhima_TOMTIM]w and wo blocking protein\RAW\TOMTIM-\R_Gomkale_Linden_TOMTIM-_A10.raw;	1	Intra	null	2.47e-11	LAELIEQDKDVIASIETLDNGKAISSSR(22)-ILKYVDIGKNEGATLITGGER(3):0	ALDH4_YEAST	ALDH4_YEAST	sp|P46367|ALDH4_YEAST	sp|P46367|ALDH4_YEAST	sp|P46367|ALDH4_YEAST(136)-sp|P46367|ALDH4_YEAST(377)	7	136	377	15561	10.6073	13248;	File: "Z:\alinden\DATA\2017\06_Jun\170619[Ridhima_TOMTIM]w and wo blocking protein\RAW\TOMTIM-\R_Gomkale_Linden_TOMTIM-_A10.raw"; ID: "13248"; scans: "15561"	184.924
no	DSS	94	1,94	6182.04	1.01934	0	none	Z:\alinden\DATA\2017\06_Jun\170619[Ridhima_TOMTIM]w and wo blocking protein\RAW\TOMTIM-\R_Gomkale_Linden_TOMTIM-_A10.raw;	1	Intra	null	0.00182	ELSLKQSLGFEPNINNIISGPGGMHVDTAR(5)-MSWLFGDKTPTDDANAAVGGQDTTKPK(25):0	TIM23_YEAST	TIM23_YEAST	sp|P32897|TIM23_YEAST	sp|P32897|TIM23_YEAST	sp|P32897|TIM23_YEAST(32)-sp|P32897|TIM23_YEAST(25)	14	32	25	15627	2.73993	13311;	File: "Z:\alinden\DATA\2017\06_Jun\170619[Ridhima_TOMTIM]w and wo blocking protein\RAW\TOMTIM-\R_Gomkale_Linden_TOMTIM-_A10.raw"; ID: "13311"; scans: "15627"	164.833
no	DSS	95	1,95	5398.87	0.0063	0	none	Z:\alinden\DATA\2017\06_Jun\170619[Ridhima_TOMTIM]w and wo blocking protein\RAW\TOMTIM-\R_Gomkale_Linden_TOMTIM-_A10.raw;	1	Intra	null	5.95e-11	LAELIEQDKDVIASIETLDNGKAISSSR(22)-ILKYVDIGKNEGATLITGGER(3):0	ALDH4_YEAST	ALDH4_YEAST	sp|P46367|ALDH4_YEAST	sp|P46367|ALDH4_YEAST	sp|P46367|ALDH4_YEAST(136)-sp|P46367|ALDH4_YEAST(377)	7	136	377	15655	10.2255	13337;	File: "Z:\alinden\DATA\2017\06_Jun\170619[Ridhima_TOMTIM]w and wo blocking protein\RAW\TOMTIM-\R_Gomkale_Linden_TOMTIM-_A10.raw"; ID: "13337"; scans: "15655"	1.16669
no	DSS	96	1,96	3540.99	2.00769	0	none	Z:\alinden\DATA\2017\06_Jun\170619[Ridhima_TOMTIM]w and wo blocking protein\RAW\TOMTIM-\R_Gomkale_Linden_TOMTIM-_A10.raw;	1	Intra	null	2.27e-09	IVKEEIFGPVVTVTKFK(15)-GYFIKPTVFGDVK(5):0	ALDH4_YEAST	ALDH4_YEAST	sp|P46367|ALDH4_YEAST	sp|P46367|ALDH4_YEAST	sp|P46367|ALDH4_YEAST(431)-sp|P46367|ALDH4_YEAST(404)	4	431	404	15699	8.64397	13379;	File: "Z:\alinden\DATA\2017\06_Jun\170619[Ridhima_TOMTIM]w and wo blocking protein\RAW\TOMTIM-\R_Gomkale_Linden_TOMTIM-_A10.raw"; ID: "13379"; scans: "15699"	566.503
no	DSS	97	1,97	4405.22	1.01113	0	none	Z:\alinden\DATA\2017\06_Jun\170619[Ridhima_TOMTIM]w and wo blocking protein\RAW\TOMTIM-\R_Gomkale_Linden_TOMTIM-_A10.raw;	1	Intra	18,M(Oxidation[M]);	0.000219	VGDPFDESTFQGAQTSQMQLNKILK(22)-GYFIKPTVFGDVK(5):0	ALDH4_YEAST	ALDH4_YEAST	sp|P46367|ALDH4_YEAST	sp|P46367|ALDH4_YEAST	sp|P46367|ALDH4_YEAST(374)-sp|P46367|ALDH4_YEAST(404)	12	374	404	15775	3.65956	13450;	File: "Z:\alinden\DATA\2017\06_Jun\170619[Ridhima_TOMTIM]w and wo blocking protein\RAW\TOMTIM-\R_Gomkale_Linden_TOMTIM-_A10.raw"; ID: "13450"; scans: "15775"	229.425
no	DSS	98	1,98	3043.65	0.01542	0	none	Z:\alinden\DATA\2017\06_Jun\170619[Ridhima_TOMTIM]w and wo blocking protein\RAW\TOMTIM-\R_Gomkale_Linden_TOMTIM-_A10.raw;	1	Inter	null	0.0001	ISFPAEFHAQTAVEAAVKAYR(18)-GVLKGK(4):0	PRPD_YEAST	FSF1_YEAST	sp|Q12428|PRPD_YEAST	sp|Q12029|FSF1_YEAST	sp|Q12428|PRPD_YEAST(333)-sp|Q12029|FSF1_YEAST(262)	2	333	262	15798	4	13472;	File: "Z:\alinden\DATA\2017\06_Jun\170619[Ridhima_TOMTIM]w and wo blocking protein\RAW\TOMTIM-\R_Gomkale_Linden_TOMTIM-_A10.raw"; ID: "13472"; scans: "15798"	5.06459
no	DSS	99	1,99	3977.27	0.02356	0	none	Z:\alinden\DATA\2017\06_Jun\170619[Ridhima_TOMTIM]w and wo blocking protein\RAW\TOMTIM-\R_Gomkale_Linden_TOMTIM-_A10.raw;	1	Intra	null	1.63e-05	RILPEIASTYGVLLNDPQLKIPVSR(20)-FLDKLGLSR(4):0	MS116_YEAST	MS116_YEAST	sp|P15424|MS116_YEAST	sp|P15424|MS116_YEAST	sp|P15424|MS116_YEAST(569)-sp|P15424|MS116_YEAST(579)	2	569	579	16006	4.78781	13668;	File: "Z:\alinden\DATA\2017\06_Jun\170619[Ridhima_TOMTIM]w and wo blocking protein\RAW\TOMTIM-\R_Gomkale_Linden_TOMTIM-_A10.raw"; ID: "13668"; scans: "16006"	5.92212
no	DSS	100	1100	4644.4	1.00788	0	none	Z:\alinden\DATA\2017\06_Jun\170619[Ridhima_TOMTIM]w and wo blocking protein\RAW\TOMTIM-\R_Gomkale_Linden_TOMTIM-_A10.raw;	1	Intra	null	6.3e-06	LHPVVTPKDVPANASFNLEDPNIDFER(8)-VILNAVESLKEAST(10):0	ATPJ_YEAST	ATPJ_YEAST	sp|P81449|ATPJ_YEAST	sp|P81449|ATPJ_YEAST	sp|P81449|ATPJ_YEAST(63)-sp|P81449|ATPJ_YEAST(92)	1	63	92	16253	5.20066	13901;	File: "Z:\alinden\DATA\2017\06_Jun\170619[Ridhima_TOMTIM]w and wo blocking protein\RAW\TOMTIM-\R_Gomkale_Linden_TOMTIM-_A10.raw"; ID: "13901"; scans: "16253"	216.916
no	DSS	101	1101	3265.83	-0.0035	0	none	Z:\alinden\DATA\2017\06_Jun\170619[Ridhima_TOMTIM]w and wo blocking protein\RAW\TOMTIM-\R_Gomkale_Linden_TOMTIM-_A10.raw;	1	Intra	null	3.19e-08	IVKEEIFGPVVTVTK(3)-GYFIKPTVFGDVK(5):0	ALDH4_YEAST	ALDH4_YEAST	sp|P46367|ALDH4_YEAST	sp|P46367|ALDH4_YEAST	sp|P46367|ALDH4_YEAST(419)-sp|P46367|ALDH4_YEAST(404)	15	419	404	16280	7.49621	13927;	File: "Z:\alinden\DATA\2017\06_Jun\170619[Ridhima_TOMTIM]w and wo blocking protein\RAW\TOMTIM-\R_Gomkale_Linden_TOMTIM-_A10.raw"; ID: "13927"; scans: "16280"	-1.07137
no	DSS	102	1102	3265.83	0.00559	0	none	Z:\alinden\DATA\2017\06_Jun\170619[Ridhima_TOMTIM]w and wo blocking protein\RAW\TOMTIM-\R_Gomkale_Linden_TOMTIM-_A10.raw;	1	Intra	null	4.15e-10	IVKEEIFGPVVTVTK(3)-GYFIKPTVFGDVK(5):0	ALDH4_YEAST	ALDH4_YEAST	sp|P46367|ALDH4_YEAST	sp|P46367|ALDH4_YEAST	sp|P46367|ALDH4_YEAST(419)-sp|P46367|ALDH4_YEAST(404)	15	419	404	16288	9.38195	13934;	File: "Z:\alinden\DATA\2017\06_Jun\170619[Ridhima_TOMTIM]w and wo blocking protein\RAW\TOMTIM-\R_Gomkale_Linden_TOMTIM-_A10.raw"; ID: "13934"; scans: "16288"	1.71114
no	DSS	103	1103	3265.83	0.00698	0	none	Z:\alinden\DATA\2017\06_Jun\170619[Ridhima_TOMTIM]w and wo blocking protein\RAW\TOMTIM-\R_Gomkale_Linden_TOMTIM-_A10.raw;	1	Intra	null	2.48e-18	IVKEEIFGPVVTVTK(3)-GYFIKPTVFGDVK(5):0	ALDH4_YEAST	ALDH4_YEAST	sp|P46367|ALDH4_YEAST	sp|P46367|ALDH4_YEAST	sp|P46367|ALDH4_YEAST(419)-sp|P46367|ALDH4_YEAST(404)	15	419	404	16406	17.6055	14045;	File: "Z:\alinden\DATA\2017\06_Jun\170619[Ridhima_TOMTIM]w and wo blocking protein\RAW\TOMTIM-\R_Gomkale_Linden_TOMTIM-_A10.raw"; ID: "14045"; scans: "16406"	2.13662
no	DSS	104	1104	4577.4	0.00724	0	none	Z:\alinden\DATA\2017\06_Jun\170619[Ridhima_TOMTIM]w and wo blocking protein\RAW\TOMTIM-\R_Gomkale_Linden_TOMTIM-_A10.raw;	1	Intra	null	1.8e-18	VGDPFDESTFQGAQTSQMQLNKILK(22)-IVKEEIFGPVVTVTK(3):0	ALDH4_YEAST	ALDH4_YEAST	sp|P46367|ALDH4_YEAST	sp|P46367|ALDH4_YEAST	sp|P46367|ALDH4_YEAST(374)-sp|P46367|ALDH4_YEAST(419)	12	374	419	16422	17.7447	14060;	File: "Z:\alinden\DATA\2017\06_Jun\170619[Ridhima_TOMTIM]w and wo blocking protein\RAW\TOMTIM-\R_Gomkale_Linden_TOMTIM-_A10.raw"; ID: "14060"; scans: "16422"	1.58133
no	DSS	105	1105	3265.83	0.00157	0	none	Z:\alinden\DATA\2017\06_Jun\170619[Ridhima_TOMTIM]w and wo blocking protein\RAW\TOMTIM-\R_Gomkale_Linden_TOMTIM-_A10.raw;	1	Intra	null	8.46e-10	IVKEEIFGPVVTVTK(3)-GYFIKPTVFGDVK(5):0	ALDH4_YEAST	ALDH4_YEAST	sp|P46367|ALDH4_YEAST	sp|P46367|ALDH4_YEAST	sp|P46367|ALDH4_YEAST(419)-sp|P46367|ALDH4_YEAST(404)	15	419	404	16423	9.07263	14061;	File: "Z:\alinden\DATA\2017\06_Jun\170619[Ridhima_TOMTIM]w and wo blocking protein\RAW\TOMTIM-\R_Gomkale_Linden_TOMTIM-_A10.raw"; ID: "14061"; scans: "16423"	0.480588
no	DSS	106	1106	4276.22	2.0175	0	none	Z:\alinden\DATA\2017\06_Jun\170619[Ridhima_TOMTIM]w and wo blocking protein\RAW\TOMTIM-\R_Gomkale_Linden_TOMTIM-_A10.raw;	1	Intra	14,C(Carbamidomethyl[C]);	3.12e-05	AIFTESVKNVAAGCNPMDLR(8)-GSQVAVEKVIEFLSANKK(8):0	HSP60_YEAST	HSP60_YEAST	sp|P19882|HSP60_YEAST	sp|P19882|HSP60_YEAST	sp|P19882|HSP60_YEAST(126)-sp|P19882|HSP60_YEAST(147)	5	126	147	16522	4.50585	14155;	File: "Z:\alinden\DATA\2017\06_Jun\170619[Ridhima_TOMTIM]w and wo blocking protein\RAW\TOMTIM-\R_Gomkale_Linden_TOMTIM-_A10.raw"; ID: "14155"; scans: "16522"	471.461
no	DSS	107	1107	4276.22	0.0258	0	none	Z:\alinden\DATA\2017\06_Jun\170619[Ridhima_TOMTIM]w and wo blocking protein\RAW\TOMTIM-\R_Gomkale_Linden_TOMTIM-_A10.raw;	1	Intra	14,C(Carbamidomethyl[C]);	3.43e-05	AIFTESVKNVAAGCNPMDLR(8)-GSQVAVEKVIEFLSANKK(8):0	HSP60_YEAST	HSP60_YEAST	sp|P19882|HSP60_YEAST	sp|P19882|HSP60_YEAST	sp|P19882|HSP60_YEAST(126)-sp|P19882|HSP60_YEAST(147)	5	126	147	16544	4.46471	14175;	File: "Z:\alinden\DATA\2017\06_Jun\170619[Ridhima_TOMTIM]w and wo blocking protein\RAW\TOMTIM-\R_Gomkale_Linden_TOMTIM-_A10.raw"; ID: "14175"; scans: "16544"	6.0319
no	DSS	108	1108	4577.4	-0.00252	0	none	Z:\alinden\DATA\2017\06_Jun\170619[Ridhima_TOMTIM]w and wo blocking protein\RAW\TOMTIM-\R_Gomkale_Linden_TOMTIM-_A10.raw;	1	Intra	null	7.18e-13	VGDPFDESTFQGAQTSQMQLNKILK(22)-IVKEEIFGPVVTVTK(3):0	ALDH4_YEAST	ALDH4_YEAST	sp|P46367|ALDH4_YEAST	sp|P46367|ALDH4_YEAST	sp|P46367|ALDH4_YEAST(374)-sp|P46367|ALDH4_YEAST(419)	12	374	419	16555	12.1439	14186;	File: "Z:\alinden\DATA\2017\06_Jun\170619[Ridhima_TOMTIM]w and wo blocking protein\RAW\TOMTIM-\R_Gomkale_Linden_TOMTIM-_A10.raw"; ID: "14186"; scans: "16555"	-0.55041
no	DSS	109	1109	5054.57	1.01044	0	none	Z:\alinden\DATA\2017\06_Jun\170619[Ridhima_TOMTIM]w and wo blocking protein\RAW\TOMTIM-\R_Gomkale_Linden_TOMTIM-_A10.raw;	1	Intra	null	3.67e-07	DPANLPWGSSNVDIAIDSTGVFKELDTAQK(23)-TASGNIIPSSTGAAKAVGK(15):0	G3P3_YEAST	G3P3_YEAST	sp|P00359|G3P3_YEAST	sp|P00359|G3P3_YEAST	sp|P00359|G3P3_YEAST(101)-sp|P00359|G3P3_YEAST(213)	3	101	213	16565	6.43533	14195;	File: "Z:\alinden\DATA\2017\06_Jun\170619[Ridhima_TOMTIM]w and wo blocking protein\RAW\TOMTIM-\R_Gomkale_Linden_TOMTIM-_A10.raw"; ID: "14195"; scans: "16565"	199.826
no	DSS	110	1110	4613.43	1.00102	0	none	Z:\alinden\DATA\2017\06_Jun\170619[Ridhima_TOMTIM]w and wo blocking protein\RAW\TOMTIM-\R_Gomkale_Linden_TOMTIM-_A10.raw;	1	Intra	15,C(Carbamidomethyl[C]);	1.52e-07	ENTEGEYSGIEHIVCPGVVQSIKLITR(23)-KTFGLFANVRPAK(1):0	IDH2_YEAST	IDH2_YEAST	sp|P28241|IDH2_YEAST	sp|P28241|IDH2_YEAST	sp|P28241|IDH2_YEAST(173)-sp|P28241|IDH2_YEAST(120)	1	173	120	16605	6.81816	14233;	File: "Z:\alinden\DATA\2017\06_Jun\170619[Ridhima_TOMTIM]w and wo blocking protein\RAW\TOMTIM-\R_Gomkale_Linden_TOMTIM-_A10.raw"; ID: "14233"; scans: "16605"	216.885
no	DSS	111	1111	4389.22	0.99622	0	none	Z:\alinden\DATA\2017\06_Jun\170619[Ridhima_TOMTIM]w and wo blocking protein\RAW\TOMTIM-\R_Gomkale_Linden_TOMTIM-_A10.raw;	1	Intra	null	3.79e-15	VGDPFDESTFQGAQTSQMQLNKILK(22)-GYFIKPTVFGDVK(5):0	ALDH4_YEAST	ALDH4_YEAST	sp|P46367|ALDH4_YEAST	sp|P46367|ALDH4_YEAST	sp|P46367|ALDH4_YEAST(374)-sp|P46367|ALDH4_YEAST(404)	12	374	404	16621	14.4214	14248;	File: "Z:\alinden\DATA\2017\06_Jun\170619[Ridhima_TOMTIM]w and wo blocking protein\RAW\TOMTIM-\R_Gomkale_Linden_TOMTIM-_A10.raw"; ID: "14248"; scans: "16621"	226.866
no	DSS	112	1112	4389.22	-0.01104	0	none	Z:\alinden\DATA\2017\06_Jun\170619[Ridhima_TOMTIM]w and wo blocking protein\RAW\TOMTIM-\R_Gomkale_Linden_TOMTIM-_A10.raw;	1	Intra	null	1.16e-12	VGDPFDESTFQGAQTSQMQLNKILK(22)-GYFIKPTVFGDVK(5):0	ALDH4_YEAST	ALDH4_YEAST	sp|P46367|ALDH4_YEAST	sp|P46367|ALDH4_YEAST	sp|P46367|ALDH4_YEAST(374)-sp|P46367|ALDH4_YEAST(404)	12	374	404	16660	11.9355	14285;	File: "Z:\alinden\DATA\2017\06_Jun\170619[Ridhima_TOMTIM]w and wo blocking protein\RAW\TOMTIM-\R_Gomkale_Linden_TOMTIM-_A10.raw"; ID: "14285"; scans: "16660"	-2.51468
no	DSS	113	1113	6182.04	2.00259	0	none	Z:\alinden\DATA\2017\06_Jun\170619[Ridhima_TOMTIM]w and wo blocking protein\RAW\TOMTIM-\R_Gomkale_Linden_TOMTIM-_A10.raw;	1	Intra	null	4.29e-16	ELSLKQSLGFEPNINNIISGPGGMHVDTAR(5)-MSWLFGDKTPTDDANAAVGGQDTTKPK(8):0	TIM23_YEAST	TIM23_YEAST	sp|P32897|TIM23_YEAST	sp|P32897|TIM23_YEAST	sp|P32897|TIM23_YEAST(32)-sp|P32897|TIM23_YEAST(8)	12	32	8	16937	15.3675	14546;	File: "Z:\alinden\DATA\2017\06_Jun\170619[Ridhima_TOMTIM]w and wo blocking protein\RAW\TOMTIM-\R_Gomkale_Linden_TOMTIM-_A10.raw"; ID: "14546"; scans: "16937"	323.779
no	DSS	114	1114	6182.04	0.97659	0	none	Z:\alinden\DATA\2017\06_Jun\170619[Ridhima_TOMTIM]w and wo blocking protein\RAW\TOMTIM-\R_Gomkale_Linden_TOMTIM-_A10.raw;	1	Intra	null	8.42e-14	ELSLKQSLGFEPNINNIISGPGGMHVDTAR(5)-MSWLFGDKTPTDDANAAVGGQDTTKPK(8):0	TIM23_YEAST	TIM23_YEAST	sp|P32897|TIM23_YEAST	sp|P32897|TIM23_YEAST	sp|P32897|TIM23_YEAST(32)-sp|P32897|TIM23_YEAST(8)	12	32	8	16992	13.0747	14598;	File: "Z:\alinden\DATA\2017\06_Jun\170619[Ridhima_TOMTIM]w and wo blocking protein\RAW\TOMTIM-\R_Gomkale_Linden_TOMTIM-_A10.raw"; ID: "14598"; scans: "16992"	157.922
no	DSS	115	1115	6841.5	3.99608	0	none	Z:\alinden\DATA\2017\06_Jun\170619[Ridhima_TOMTIM]w and wo blocking protein\RAW\TOMTIM-\R_Gomkale_Linden_TOMTIM-_A10.raw;	1	Intra	null	2.76e-18	TALHDLHVSLGGTMVPYAGYSMPVLYKGQTHIESHNWTR(27)-AVEFAEQLLANPVMKPIGLAAR(15):0	GCST_YEAST	GCST_YEAST	sp|P48015|GCST_YEAST	sp|P48015|GCST_YEAST	sp|P48015|GCST_YEAST(45)-sp|P48015|GCST_YEAST(243)	7	45	243	17138	17.5591	14735;	File: "Z:\alinden\DATA\2017\06_Jun\170619[Ridhima_TOMTIM]w and wo blocking protein\RAW\TOMTIM-\R_Gomkale_Linden_TOMTIM-_A10.raw"; ID: "14735"; scans: "17138"	583.668
no	DSS	116	1116	5934.01	3.00558	0	none	Z:\alinden\DATA\2017\06_Jun\170619[Ridhima_TOMTIM]w and wo blocking protein\RAW\TOMTIM-\R_Gomkale_Linden_TOMTIM-_A10.raw;	1	Intra	null	2.1e-10	LAELIEQDKDVIASIETLDNGKAISSSR(22)-VGDPFDESTFQGAQTSQMQLNKILK(22):0	ALDH4_YEAST	ALDH4_YEAST	sp|P46367|ALDH4_YEAST	sp|P46367|ALDH4_YEAST	sp|P46367|ALDH4_YEAST(136)-sp|P46367|ALDH4_YEAST(374)	8	136	374	17602	9.67778	15172;	File: "Z:\alinden\DATA\2017\06_Jun\170619[Ridhima_TOMTIM]w and wo blocking protein\RAW\TOMTIM-\R_Gomkale_Linden_TOMTIM-_A10.raw"; ID: "15172"; scans: "17602"	506.158
no	DSS	117	1117	4844.49	1.00259	0	none	Z:\alinden\DATA\2017\06_Jun\170619[Ridhima_TOMTIM]w and wo blocking protein\RAW\TOMTIM-\R_Gomkale_Linden_TOMTIM-_A10.raw;	1	Intra	null	5.4e-08	ENTEGEFSGLEHESVPGVVESLKVMTRPK(23)-KQLDIYANVALFK(1):0	IDH1_YEAST	IDH1_YEAST	sp|P28834|IDH1_YEAST	sp|P28834|IDH1_YEAST	sp|P28834|IDH1_YEAST(163)-sp|P28834|IDH1_YEAST(110)	4	163	110	17619	7.26761	15188;	File: "Z:\alinden\DATA\2017\06_Jun\170619[Ridhima_TOMTIM]w and wo blocking protein\RAW\TOMTIM-\R_Gomkale_Linden_TOMTIM-_A10.raw"; ID: "15188"; scans: "17619"	206.869
no	DSS	118	1118	4844.49	2.0067	0	none	Z:\alinden\DATA\2017\06_Jun\170619[Ridhima_TOMTIM]w and wo blocking protein\RAW\TOMTIM-\R_Gomkale_Linden_TOMTIM-_A10.raw;	1	Intra	null	4.08e-15	ENTEGEFSGLEHESVPGVVESLKVMTRPK(23)-KQLDIYANVALFK(1):0	IDH1_YEAST	IDH1_YEAST	sp|P28834|IDH1_YEAST	sp|P28834|IDH1_YEAST	sp|P28834|IDH1_YEAST(163)-sp|P28834|IDH1_YEAST(110)	4	163	110	17656	14.3893	15223;	File: "Z:\alinden\DATA\2017\06_Jun\170619[Ridhima_TOMTIM]w and wo blocking protein\RAW\TOMTIM-\R_Gomkale_Linden_TOMTIM-_A10.raw"; ID: "15223"; scans: "17656"	413.965
no	DSS	119	1119	5934.01	2.01253	0	none	Z:\alinden\DATA\2017\06_Jun\170619[Ridhima_TOMTIM]w and wo blocking protein\RAW\TOMTIM-\R_Gomkale_Linden_TOMTIM-_A10.raw;	1	Intra	null	2.6e-10	LAELIEQDKDVIASIETLDNGKAISSSR(22)-VGDPFDESTFQGAQTSQMQLNKILK(22):0	ALDH4_YEAST	ALDH4_YEAST	sp|P46367|ALDH4_YEAST	sp|P46367|ALDH4_YEAST	sp|P46367|ALDH4_YEAST(136)-sp|P46367|ALDH4_YEAST(374)	8	136	374	17664	9.58503	15231;	File: "Z:\alinden\DATA\2017\06_Jun\170619[Ridhima_TOMTIM]w and wo blocking protein\RAW\TOMTIM-\R_Gomkale_Linden_TOMTIM-_A10.raw"; ID: "15231"; scans: "17664"	338.979
no	DSS	120	1120	4995.58	0.01276	0	none	Z:\alinden\DATA\2017\06_Jun\170619[Ridhima_TOMTIM]w and wo blocking protein\RAW\TOMTIM-\R_Gomkale_Linden_TOMTIM-_A10.raw;	1	Intra	null	1.11e-07	TIFEAENIPIDWETINIKQTDHK(18)-FTVTLIPGDGVGKEITDSVR(13):0	IDH1_YEAST	IDH1_YEAST	sp|P28834|IDH1_YEAST	sp|P28834|IDH1_YEAST	sp|P28834|IDH1_YEAST(66)-sp|P28834|IDH1_YEAST(41)	21	66	41	17714	6.95468	15278;	File: "Z:\alinden\DATA\2017\06_Jun\170619[Ridhima_TOMTIM]w and wo blocking protein\RAW\TOMTIM-\R_Gomkale_Linden_TOMTIM-_A10.raw"; ID: "15278"; scans: "17714"	2.55374
no	DSS	121	1121	4995.58	2.01254	0	none	Z:\alinden\DATA\2017\06_Jun\170619[Ridhima_TOMTIM]w and wo blocking protein\RAW\TOMTIM-\R_Gomkale_Linden_TOMTIM-_A10.raw;	1	Intra	null	6.98e-09	TIFEAENIPIDWETINIKQTDHK(18)-FTVTLIPGDGVGKEITDSVR(13):0	IDH1_YEAST	IDH1_YEAST	sp|P28834|IDH1_YEAST	sp|P28834|IDH1_YEAST	sp|P28834|IDH1_YEAST(66)-sp|P28834|IDH1_YEAST(41)	21	66	41	17719	8.15614	15283;	File: "Z:\alinden\DATA\2017\06_Jun\170619[Ridhima_TOMTIM]w and wo blocking protein\RAW\TOMTIM-\R_Gomkale_Linden_TOMTIM-_A10.raw"; ID: "15283"; scans: "17719"	402.621
no	DSS	123	1123	4995.58	2.00921	0	none	Z:\alinden\DATA\2017\06_Jun\170619[Ridhima_TOMTIM]w and wo blocking protein\RAW\TOMTIM-\R_Gomkale_Linden_TOMTIM-_A10.raw;	1	Intra	null	7.75e-08	TIFEAENIPIDWETINIKQTDHK(18)-FTVTLIPGDGVGKEITDSVR(13):0	IDH1_YEAST	IDH1_YEAST	sp|P28834|IDH1_YEAST	sp|P28834|IDH1_YEAST	sp|P28834|IDH1_YEAST(66)-sp|P28834|IDH1_YEAST(41)	21	66	41	17853	7.1107	15409;	File: "Z:\alinden\DATA\2017\06_Jun\170619[Ridhima_TOMTIM]w and wo blocking protein\RAW\TOMTIM-\R_Gomkale_Linden_TOMTIM-_A10.raw"; ID: "15409"; scans: "17853"	401.955
no	DSS	124	1124	4995.58	0.00522	0	none	Z:\alinden\DATA\2017\06_Jun\170619[Ridhima_TOMTIM]w and wo blocking protein\RAW\TOMTIM-\R_Gomkale_Linden_TOMTIM-_A10.raw;	1	Intra	null	4.22e-09	TIFEAENIPIDWETINIKQTDHK(18)-FTVTLIPGDGVGKEITDSVR(13):0	IDH1_YEAST	IDH1_YEAST	sp|P28834|IDH1_YEAST	sp|P28834|IDH1_YEAST	sp|P28834|IDH1_YEAST(66)-sp|P28834|IDH1_YEAST(41)	21	66	41	17854	8.37469	15410;	File: "Z:\alinden\DATA\2017\06_Jun\170619[Ridhima_TOMTIM]w and wo blocking protein\RAW\TOMTIM-\R_Gomkale_Linden_TOMTIM-_A10.raw"; ID: "15410"; scans: "17854"	1.04471
no	DSS	125	1125	5373.66	1.00257	0	none	Z:\alinden\DATA\2017\06_Jun\170619[Ridhima_TOMTIM]w and wo blocking protein\RAW\TOMTIM-\R_Gomkale_Linden_TOMTIM-_A10.raw;	1	Intra	9,C(Carbamidomethyl[C]);	5.21e-08	YDYAVAEQCPVKSAEDQLYAITFR(12)-ESELLGGTFKSTLDREYITLK(10):0	QCR2_YEAST	QCR2_YEAST	sp|P07257|QCR2_YEAST	sp|P07257|QCR2_YEAST	sp|P07257|QCR2_YEAST(140)-sp|P07257|QCR2_YEAST(79)	2	140	79	17901	7.28316	15454;	File: "Z:\alinden\DATA\2017\06_Jun\170619[Ridhima_TOMTIM]w and wo blocking protein\RAW\TOMTIM-\R_Gomkale_Linden_TOMTIM-_A10.raw"; ID: "15454"; scans: "17901"	186.501
no	DSS	126	1126	5373.66	3.02069	0	none	Z:\alinden\DATA\2017\06_Jun\170619[Ridhima_TOMTIM]w and wo blocking protein\RAW\TOMTIM-\R_Gomkale_Linden_TOMTIM-_A10.raw;	1	Intra	9,C(Carbamidomethyl[C]);	3.06e-05	YDYAVAEQCPVKSAEDQLYAITFR(12)-ESELLGGTFKSTLDREYITLK(10):0	QCR2_YEAST	QCR2_YEAST	sp|P07257|QCR2_YEAST	sp|P07257|QCR2_YEAST	sp|P07257|QCR2_YEAST(140)-sp|P07257|QCR2_YEAST(79)	2	140	79	17906	4.51428	15459;	File: "Z:\alinden\DATA\2017\06_Jun\170619[Ridhima_TOMTIM]w and wo blocking protein\RAW\TOMTIM-\R_Gomkale_Linden_TOMTIM-_A10.raw"; ID: "15459"; scans: "17906"	561.708
no	DSS	127	1127	4995.58	0.99542	0	none	Z:\alinden\DATA\2017\06_Jun\170619[Ridhima_TOMTIM]w and wo blocking protein\RAW\TOMTIM-\R_Gomkale_Linden_TOMTIM-_A10.raw;	1	Intra	null	6.95e-07	TIFEAENIPIDWETINIKQTDHK(18)-FTVTLIPGDGVGKEITDSVR(13):0	IDH1_YEAST	IDH1_YEAST	sp|P28834|IDH1_YEAST	sp|P28834|IDH1_YEAST	sp|P28834|IDH1_YEAST(66)-sp|P28834|IDH1_YEAST(41)	21	66	41	17997	6.15802	15544;	File: "Z:\alinden\DATA\2017\06_Jun\170619[Ridhima_TOMTIM]w and wo blocking protein\RAW\TOMTIM-\R_Gomkale_Linden_TOMTIM-_A10.raw"; ID: "15544"; scans: "17997"	199.18
no	DSS	128	1128	4622.44	3.00823	0	none	Z:\alinden\DATA\2017\06_Jun\170619[Ridhima_TOMTIM]w and wo blocking protein\RAW\TOMTIM-\R_Gomkale_Linden_TOMTIM-_A10.raw;	1	Intra	null	8.72e-10	LAELIEQDKDVIASIETLDNGKAISSSR(22)-GYFIKPTVFGDVK(5):0	ALDH4_YEAST	ALDH4_YEAST	sp|P46367|ALDH4_YEAST	sp|P46367|ALDH4_YEAST	sp|P46367|ALDH4_YEAST(136)-sp|P46367|ALDH4_YEAST(404)	2	136	404	18043	9.05948	15588;	File: "Z:\alinden\DATA\2017\06_Jun\170619[Ridhima_TOMTIM]w and wo blocking protein\RAW\TOMTIM-\R_Gomkale_Linden_TOMTIM-_A10.raw"; ID: "15588"; scans: "18043"	650.224
no	DSS	129	1129	4092.3	2.0096	0	none	Z:\alinden\DATA\2017\06_Jun\170619[Ridhima_TOMTIM]w and wo blocking protein\RAW\TOMTIM-\R_Gomkale_Linden_TOMTIM-_A10.raw;	1	Intra	null	0.000241	IGIQPPKIFQAGKIGIISR(13)-SKPMPVASFIAGTVAGQMK(2):0	SUCA_YEAST	SUCA_YEAST	sp|P53598|SUCA_YEAST	sp|P53598|SUCA_YEAST	sp|P53598|SUCA_YEAST(177)-sp|P53598|SUCA_YEAST(261)	1	177	261	18171	3.61798	15708;	File: "Z:\alinden\DATA\2017\06_Jun\170619[Ridhima_TOMTIM]w and wo blocking protein\RAW\TOMTIM-\R_Gomkale_Linden_TOMTIM-_A10.raw"; ID: "15708"; scans: "18171"	490.707
no	DSS	130	1130	5412.77	1.02296	0	none	Z:\alinden\DATA\2017\06_Jun\170619[Ridhima_TOMTIM]w and wo blocking protein\RAW\TOMTIM-\R_Gomkale_Linden_TOMTIM-_A10.raw;	1	Intra	4,C(Carbamidomethyl[C]);	3.77e-10	YVGCTGSPAGSHTIMWLKPTVNEVAR(18)-LELLGKLEGIDVFDTKPLDSSR(6):0	COX4_YEAST	COX4_YEAST	sp|P04037|COX4_YEAST	sp|P04037|COX4_YEAST	sp|P04037|COX4_YEAST(125)-sp|P04037|COX4_YEAST(74)	3	125	74	18380	9.42366	15905;	File: "Z:\alinden\DATA\2017\06_Jun\170619[Ridhima_TOMTIM]w and wo blocking protein\RAW\TOMTIM-\R_Gomkale_Linden_TOMTIM-_A10.raw"; ID: "15905"; scans: "18380"	188.919
no	DSS	131	1131	4698.55	0.99654	0	none	Z:\alinden\DATA\2017\06_Jun\170619[Ridhima_TOMTIM]w and wo blocking protein\RAW\TOMTIM-\R_Gomkale_Linden_TOMTIM-_A10.raw;	1	Intra	null	1.78e-10	VIDPQHSDKPNVLILGSGWGAISFLKHIDTK(26)-KYNVSIISPR(1):0	NDI1_YEAST	NDI1_YEAST	sp|P32340|NDI1_YEAST	sp|P32340|NDI1_YEAST	sp|P32340|NDI1_YEAST(70)-sp|P32340|NDI1_YEAST(76)	17	70	76	18629	9.74958	16140;	File: "Z:\alinden\DATA\2017\06_Jun\170619[Ridhima_TOMTIM]w and wo blocking protein\RAW\TOMTIM-\R_Gomkale_Linden_TOMTIM-_A10.raw"; ID: "16140"; scans: "18629"	212.005
no	DSS	132	1132	4698.55	-0.00252	0	none	Z:\alinden\DATA\2017\06_Jun\170619[Ridhima_TOMTIM]w and wo blocking protein\RAW\TOMTIM-\R_Gomkale_Linden_TOMTIM-_A10.raw;	1	Intra	null	6.99e-16	VIDPQHSDKPNVLILGSGWGAISFLKHIDTK(26)-KYNVSIISPR(1):0	NDI1_YEAST	NDI1_YEAST	sp|P32340|NDI1_YEAST	sp|P32340|NDI1_YEAST	sp|P32340|NDI1_YEAST(70)-sp|P32340|NDI1_YEAST(76)	17	70	76	18644	15.1555	16154;	File: "Z:\alinden\DATA\2017\06_Jun\170619[Ridhima_TOMTIM]w and wo blocking protein\RAW\TOMTIM-\R_Gomkale_Linden_TOMTIM-_A10.raw"; ID: "16154"; scans: "18644"	-0.536221
no	DSS	133	1133	4698.55	2.00633	0	none	Z:\alinden\DATA\2017\06_Jun\170619[Ridhima_TOMTIM]w and wo blocking protein\RAW\TOMTIM-\R_Gomkale_Linden_TOMTIM-_A10.raw;	1	Intra	null	2.92e-13	VIDPQHSDKPNVLILGSGWGAISFLKHIDTK(26)-KYNVSIISPR(1):0	NDI1_YEAST	NDI1_YEAST	sp|P32340|NDI1_YEAST	sp|P32340|NDI1_YEAST	sp|P32340|NDI1_YEAST(70)-sp|P32340|NDI1_YEAST(76)	17	70	76	18651	12.5346	16161;	File: "Z:\alinden\DATA\2017\06_Jun\170619[Ridhima_TOMTIM]w and wo blocking protein\RAW\TOMTIM-\R_Gomkale_Linden_TOMTIM-_A10.raw"; ID: "16161"; scans: "18651"	426.736
no	DSS	134	1134	4254.18	-0.01024	0	none	Z:\alinden\DATA\2017\06_Jun\170619[Ridhima_TOMTIM]w and wo blocking protein\RAW\TOMTIM-\R_Gomkale_Linden_TOMTIM-_A10.raw;	1	Inter	null	9.98e-05	TIFEAENIPIDWETINIKQTDHK(18)-INEAKDFLEKR(5):0	IDH1_YEAST	TIM14_YEAST	sp|P28834|IDH1_YEAST	sp|Q07914|TIM14_YEAST	sp|P28834|IDH1_YEAST(66)-sp|Q07914|TIM14_YEAST(158)	1	66	158	18801	4.00087	16302;	File: "Z:\alinden\DATA\2017\06_Jun\170619[Ridhima_TOMTIM]w and wo blocking protein\RAW\TOMTIM-\R_Gomkale_Linden_TOMTIM-_A10.raw"; ID: "16302"; scans: "18801"	-2.40648
no	DSS	135	1135	3941	1.01232	0	none	Z:\alinden\DATA\2017\06_Jun\170619[Ridhima_TOMTIM]w and wo blocking protein\RAW\TOMTIM-\R_Gomkale_Linden_TOMTIM-_A10.raw;	1	Intra	null	2.89e-08	SLMLVTALNPKIGYDAASK(11)-EFDEWVVPEHMLGPK(15):0	FUMH_YEAST	FUMH_YEAST	sp|P08417|FUMH_YEAST	sp|P08417|FUMH_YEAST	sp|P08417|FUMH_YEAST(440)-sp|P08417|FUMH_YEAST(488)	3	440	488	18853	7.5391	16351;	File: "Z:\alinden\DATA\2017\06_Jun\170619[Ridhima_TOMTIM]w and wo blocking protein\RAW\TOMTIM-\R_Gomkale_Linden_TOMTIM-_A10.raw"; ID: "16351"; scans: "18853"	256.737
no	DSS	136	1136	6182.04	3.01402	0	none	Z:\alinden\DATA\2017\06_Jun\170619[Ridhima_TOMTIM]w and wo blocking protein\RAW\TOMTIM-\R_Gomkale_Linden_TOMTIM-_A10.raw;	1	Intra	null	6.47e-15	ELSLKQSLGFEPNINNIISGPGGMHVDTAR(5)-MSWLFGDKTPTDDANAAVGGQDTTKPK(1):0	TIM23_YEAST	TIM23_YEAST	sp|P32897|TIM23_YEAST	sp|P32897|TIM23_YEAST	sp|P32897|TIM23_YEAST(32)-sp|P32897|TIM23_YEAST(1)	11	32	1	18907	14.1891	16402;	File: "Z:\alinden\DATA\2017\06_Jun\170619[Ridhima_TOMTIM]w and wo blocking protein\RAW\TOMTIM-\R_Gomkale_Linden_TOMTIM-_A10.raw"; ID: "16402"; scans: "18907"	487.228
no	DSS	137	1137	6182.04	4.01554	0	none	Z:\alinden\DATA\2017\06_Jun\170619[Ridhima_TOMTIM]w and wo blocking protein\RAW\TOMTIM-\R_Gomkale_Linden_TOMTIM-_A10.raw;	1	Intra	null	4.88e-17	ELSLKQSLGFEPNINNIISGPGGMHVDTAR(5)-MSWLFGDKTPTDDANAAVGGQDTTKPK(1):0	TIM23_YEAST	TIM23_YEAST	sp|P32897|TIM23_YEAST	sp|P32897|TIM23_YEAST	sp|P32897|TIM23_YEAST(32)-sp|P32897|TIM23_YEAST(1)	11	32	1	18942	16.3116	16435;	File: "Z:\alinden\DATA\2017\06_Jun\170619[Ridhima_TOMTIM]w and wo blocking protein\RAW\TOMTIM-\R_Gomkale_Linden_TOMTIM-_A10.raw"; ID: "16435"; scans: "18942"	649.022
no	DSS	138	1138	4581.63	0.00551	0	none	Z:\alinden\DATA\2017\06_Jun\170619[Ridhima_TOMTIM]w and wo blocking protein\RAW\TOMTIM-\R_Gomkale_Linden_TOMTIM-_A10.raw;	1	Intra	null	2e-09	AVNLAYLVKNANVGTIPSVLTAR(9)-QAQNIIKPIVPGTIVPSGTK(7):0	PRPD_YEAST	PRPD_YEAST	sp|Q12428|PRPD_YEAST	sp|Q12428|PRPD_YEAST	sp|Q12428|PRPD_YEAST(268)-sp|Q12428|PRPD_YEAST(87)	7	268	87	19122	8.69897	16604;	File: "Z:\alinden\DATA\2017\06_Jun\170619[Ridhima_TOMTIM]w and wo blocking protein\RAW\TOMTIM-\R_Gomkale_Linden_TOMTIM-_A10.raw"; ID: "16604"; scans: "19122"	1.20236
no	DSS	139	1139	4581.63	1.01073	0	none	Z:\alinden\DATA\2017\06_Jun\170619[Ridhima_TOMTIM]w and wo blocking protein\RAW\TOMTIM-\R_Gomkale_Linden_TOMTIM-_A10.raw;	1	Intra	null	1.86e-16	AVNLAYLVKNANVGTIPSVLTAR(9)-QAQNIIKPIVPGTIVPSGTK(7):0	PRPD_YEAST	PRPD_YEAST	sp|Q12428|PRPD_YEAST	sp|Q12428|PRPD_YEAST	sp|Q12428|PRPD_YEAST(268)-sp|Q12428|PRPD_YEAST(87)	7	268	87	19127	15.7305	16609;	File: "Z:\alinden\DATA\2017\06_Jun\170619[Ridhima_TOMTIM]w and wo blocking protein\RAW\TOMTIM-\R_Gomkale_Linden_TOMTIM-_A10.raw"; ID: "16609"; scans: "19127"	220.508
no	DSS	140	1140	3605.84	2.0071	0	none	Z:\alinden\DATA\2017\06_Jun\170619[Ridhima_TOMTIM]w and wo blocking protein\RAW\TOMTIM-\R_Gomkale_Linden_TOMTIM-_A10.raw;	1	Intra	null	2.1e-12	VYVEESIYDKFIEEFK(10)-SPNIVFADAELKK(12):0	ALDH4_YEAST	ALDH4_YEAST	sp|P46367|ALDH4_YEAST	sp|P46367|ALDH4_YEAST	sp|P46367|ALDH4_YEAST(339)-sp|P46367|ALDH4_YEAST(306)	4	339	306	19214	11.6778	16691;	File: "Z:\alinden\DATA\2017\06_Jun\170619[Ridhima_TOMTIM]w and wo blocking protein\RAW\TOMTIM-\R_Gomkale_Linden_TOMTIM-_A10.raw"; ID: "16691"; scans: "19214"	556.159
no	DSS	141	1141	3361.79	1.00064	0	none	Z:\alinden\DATA\2017\06_Jun\170619[Ridhima_TOMTIM]w and wo blocking protein\RAW\TOMTIM-\R_Gomkale_Linden_TOMTIM-_A10.raw;	1	Inter	null	1.69e-05	VYVEESIYDKFIEEFKAASESIK(16)-KILK(1):0	ALDH4_YEAST	RT23_YEAST	sp|P46367|ALDH4_YEAST	sp|Q01163|RT23_YEAST	sp|P46367|ALDH4_YEAST(345)-sp|Q01163|RT23_YEAST(211)	2	345	211	19802	4.77211	17245;	File: "Z:\alinden\DATA\2017\06_Jun\170619[Ridhima_TOMTIM]w and wo blocking protein\RAW\TOMTIM-\R_Gomkale_Linden_TOMTIM-_A10.raw"; ID: "17245"; scans: "19802"	297.473
no	DSS	142	1142	3914.96	1.00088	0	none	Z:\alinden\DATA\2017\06_Jun\170619[Ridhima_TOMTIM]w and wo blocking protein\RAW\TOMTIM-\R_Gomkale_Linden_TOMTIM-_A10.raw;	1	Intra	null	2.91e-08	LGKFNYVAVGDVSNLPYLDEL(3)-SEPKFFLGEENR(4):0	QCR2_YEAST	QCR2_YEAST	sp|P07257|QCR2_YEAST	sp|P07257|QCR2_YEAST	sp|P07257|QCR2_YEAST(350)-sp|P07257|QCR2_YEAST(222)	3	350	222	19912	7.53611	17348;	File: "Z:\alinden\DATA\2017\06_Jun\170619[Ridhima_TOMTIM]w and wo blocking protein\RAW\TOMTIM-\R_Gomkale_Linden_TOMTIM-_A10.raw"; ID: "17348"; scans: "19912"	255.524
no	DSS	143	1143	3094.64	0.00155	0	none	Z:\alinden\DATA\2017\06_Jun\170619[Ridhima_TOMTIM]w and wo blocking protein\RAW\TOMTIM-\R_Gomkale_Linden_TOMTIM-_A10.raw;	1	Inter	null	0.000234	KTSDDNEFKLNVLK(9)-LVEEAKKEYAK(6):0	MDM38_YEAST	ATPJ_YEAST	sp|Q08179|MDM38_YEAST	sp|P81449|ATPJ_YEAST	sp|Q08179|MDM38_YEAST(514)-sp|P81449|ATPJ_YEAST(50)	2	514	50	3311	3.63078	1739;	File: "Z:\alinden\DATA\2017\06_Jun\170619[Ridhima_TOMTIM]w and wo blocking protein\RAW\TOMTIM-\R_Gomkale_Linden_TOMTIM-_A10.raw"; ID: "1739"; scans: "3311"	0.500702
no	DSS	144	1144	5107.65	-0.01915	0	none	Z:\alinden\DATA\2017\06_Jun\170619[Ridhima_TOMTIM]w and wo blocking protein\RAW\TOMTIM-\R_Gomkale_Linden_TOMTIM-_A10.raw;	1	Intra	null	4.97e-20	VYVEESIYDKFIEEFKAASESIK(16)-ILKYVDIGKNEGATLITGGER(3):0	ALDH4_YEAST	ALDH4_YEAST	sp|P46367|ALDH4_YEAST	sp|P46367|ALDH4_YEAST	sp|P46367|ALDH4_YEAST(345)-sp|P46367|ALDH4_YEAST(377)	21	345	377	19994	19.3036	17425;	File: "Z:\alinden\DATA\2017\06_Jun\170619[Ridhima_TOMTIM]w and wo blocking protein\RAW\TOMTIM-\R_Gomkale_Linden_TOMTIM-_A10.raw"; ID: "17425"; scans: "19994"	-3.74855
no	DSS	145	1145	4854.49	-0.04548	0	none	Z:\alinden\DATA\2017\06_Jun\170619[Ridhima_TOMTIM]w and wo blocking protein\RAW\TOMTIM-\R_Gomkale_Linden_TOMTIM-_A10.raw;	1	Inter	15,C(Carbamidomethyl[C]);	0.00219	ENTEGEYSGIEHIVCPGVVQSIKLITR(23)-SDEGHVLKSKTVSFR(8):0	IDH2_YEAST	PMT4_YEAST	sp|P28241|IDH2_YEAST	sp|P46971|PMT4_YEAST	sp|P28241|IDH2_YEAST(173)-sp|P46971|PMT4_YEAST(468)	1	173	468	20111	2.65956	17535;	File: "Z:\alinden\DATA\2017\06_Jun\170619[Ridhima_TOMTIM]w and wo blocking protein\RAW\TOMTIM-\R_Gomkale_Linden_TOMTIM-_A10.raw"; ID: "17535"; scans: "20111"	-9.3668
no	DSS	146	1146	5107.65	2.00185	0	none	Z:\alinden\DATA\2017\06_Jun\170619[Ridhima_TOMTIM]w and wo blocking protein\RAW\TOMTIM-\R_Gomkale_Linden_TOMTIM-_A10.raw;	1	Intra	null	4.45e-19	VYVEESIYDKFIEEFKAASESIK(16)-ILKYVDIGKNEGATLITGGER(3):0	ALDH4_YEAST	ALDH4_YEAST	sp|P46367|ALDH4_YEAST	sp|P46367|ALDH4_YEAST	sp|P46367|ALDH4_YEAST(345)-sp|P46367|ALDH4_YEAST(377)	21	345	377	20147	18.3516	17569;	File: "Z:\alinden\DATA\2017\06_Jun\170619[Ridhima_TOMTIM]w and wo blocking protein\RAW\TOMTIM-\R_Gomkale_Linden_TOMTIM-_A10.raw"; ID: "17569"; scans: "20147"	391.701
no	DSS	147	1147	4716.45	3.00901	0	none	Z:\alinden\DATA\2017\06_Jun\170619[Ridhima_TOMTIM]w and wo blocking protein\RAW\TOMTIM-\R_Gomkale_Linden_TOMTIM-_A10.raw;	1	Intra	null	1.16e-11	VYVEESIYDKFIEEFKAASESIK(16)-LGSKGYFIKPTVFGDVK(4):0	ALDH4_YEAST	ALDH4_YEAST	sp|P46367|ALDH4_YEAST	sp|P46367|ALDH4_YEAST	sp|P46367|ALDH4_YEAST(345)-sp|P46367|ALDH4_YEAST(399)	13	345	399	20372	10.9355	17781;	File: "Z:\alinden\DATA\2017\06_Jun\170619[Ridhima_TOMTIM]w and wo blocking protein\RAW\TOMTIM-\R_Gomkale_Linden_TOMTIM-_A10.raw"; ID: "17781"; scans: "20372"	637.439
no	DSS	148	1148	4716.45	1.99848	0	none	Z:\alinden\DATA\2017\06_Jun\170619[Ridhima_TOMTIM]w and wo blocking protein\RAW\TOMTIM-\R_Gomkale_Linden_TOMTIM-_A10.raw;	1	Intra	null	1.89e-14	VYVEESIYDKFIEEFKAASESIK(16)-LGSKGYFIKPTVFGDVK(4):0	ALDH4_YEAST	ALDH4_YEAST	sp|P46367|ALDH4_YEAST	sp|P46367|ALDH4_YEAST	sp|P46367|ALDH4_YEAST(345)-sp|P46367|ALDH4_YEAST(399)	13	345	399	20396	13.7235	17804;	File: "Z:\alinden\DATA\2017\06_Jun\170619[Ridhima_TOMTIM]w and wo blocking protein\RAW\TOMTIM-\R_Gomkale_Linden_TOMTIM-_A10.raw"; ID: "17804"; scans: "20396"	423.456
no	DSS	149	1149	4716.45	3.00467	0	none	Z:\alinden\DATA\2017\06_Jun\170619[Ridhima_TOMTIM]w and wo blocking protein\RAW\TOMTIM-\R_Gomkale_Linden_TOMTIM-_A10.raw;	1	Intra	null	3.27e-10	VYVEESIYDKFIEEFKAASESIK(16)-LGSKGYFIKPTVFGDVK(4):0	ALDH4_YEAST	ALDH4_YEAST	sp|P46367|ALDH4_YEAST	sp|P46367|ALDH4_YEAST	sp|P46367|ALDH4_YEAST(345)-sp|P46367|ALDH4_YEAST(399)	13	345	399	20431	9.48545	17837;	File: "Z:\alinden\DATA\2017\06_Jun\170619[Ridhima_TOMTIM]w and wo blocking protein\RAW\TOMTIM-\R_Gomkale_Linden_TOMTIM-_A10.raw"; ID: "17837"; scans: "20431"	636.52
no	DSS	150	1150	4753.39	0.00647	0	none	Z:\alinden\DATA\2017\06_Jun\170619[Ridhima_TOMTIM]w and wo blocking protein\RAW\TOMTIM-\R_Gomkale_Linden_TOMTIM-_A10.raw;	1	Intra	null	1.15e-10	VYVEESIYDKFIEEFKAASESIK(16)-YVDIGKNEGATLITGGER(6):0	ALDH4_YEAST	ALDH4_YEAST	sp|P46367|ALDH4_YEAST	sp|P46367|ALDH4_YEAST	sp|P46367|ALDH4_YEAST(345)-sp|P46367|ALDH4_YEAST(383)	20	345	383	20498	9.9393	17899;	File: "Z:\alinden\DATA\2017\06_Jun\170619[Ridhima_TOMTIM]w and wo blocking protein\RAW\TOMTIM-\R_Gomkale_Linden_TOMTIM-_A10.raw"; ID: "17899"; scans: "20498"	1.36084
no	DSS	151	1151	4716.45	2.00836	0	none	Z:\alinden\DATA\2017\06_Jun\170619[Ridhima_TOMTIM]w and wo blocking protein\RAW\TOMTIM-\R_Gomkale_Linden_TOMTIM-_A10.raw;	1	Intra	null	1.1e-08	VYVEESIYDKFIEEFKAASESIK(16)-LGSKGYFIKPTVFGDVK(4):0	ALDH4_YEAST	ALDH4_YEAST	sp|P46367|ALDH4_YEAST	sp|P46367|ALDH4_YEAST	sp|P46367|ALDH4_YEAST(345)-sp|P46367|ALDH4_YEAST(399)	13	345	399	20512	7.95861	17913;	File: "Z:\alinden\DATA\2017\06_Jun\170619[Ridhima_TOMTIM]w and wo blocking protein\RAW\TOMTIM-\R_Gomkale_Linden_TOMTIM-_A10.raw"; ID: "17913"; scans: "20512"	425.548
no	DSS	152	1152	4609.49	2.03983	0	none	Z:\alinden\DATA\2017\06_Jun\170619[Ridhima_TOMTIM]w and wo blocking protein\RAW\TOMTIM-\R_Gomkale_Linden_TOMTIM-_A10.raw;	1	Inter	5,C(Carbamidomethyl[C]);	7.48e-05	VLNNCFSYDLVPAPAVIEKALRAAR(19)-LGNGISSEQLLDKALK(13):0	COX6_YEAST	GCSP_YEAST	sp|P00427|COX6_YEAST	sp|P49095|GCSP_YEAST	sp|P00427|COX6_YEAST(90)-sp|P49095|GCSP_YEAST(474)	1	90	474	20540	4.1261	17939;	File: "Z:\alinden\DATA\2017\06_Jun\170619[Ridhima_TOMTIM]w and wo blocking protein\RAW\TOMTIM-\R_Gomkale_Linden_TOMTIM-_A10.raw"; ID: "17939"; scans: "20540"	442.236
no	DSS	153	1153	4753.39	3.00665	0	none	Z:\alinden\DATA\2017\06_Jun\170619[Ridhima_TOMTIM]w and wo blocking protein\RAW\TOMTIM-\R_Gomkale_Linden_TOMTIM-_A10.raw;	1	Intra	null	7.83e-16	VYVEESIYDKFIEEFKAASESIK(16)-YVDIGKNEGATLITGGER(6):0	ALDH4_YEAST	ALDH4_YEAST	sp|P46367|ALDH4_YEAST	sp|P46367|ALDH4_YEAST	sp|P46367|ALDH4_YEAST(345)-sp|P46367|ALDH4_YEAST(383)	20	345	383	20599	15.1062	17994;	File: "Z:\alinden\DATA\2017\06_Jun\170619[Ridhima_TOMTIM]w and wo blocking protein\RAW\TOMTIM-\R_Gomkale_Linden_TOMTIM-_A10.raw"; ID: "17994"; scans: "20599"	631.994
no	DSS	154	1154	6406.29	0.0332	0	none	Z:\alinden\DATA\2017\06_Jun\170619[Ridhima_TOMTIM]w and wo blocking protein\RAW\TOMTIM-\R_Gomkale_Linden_TOMTIM-_A10.raw;	1	Intra	15,C(Carbamidomethyl[C]);	3.25e-05	KIFSAANVPIEWESCDVSPIFVNGLTTIPDPAVQSITK(1)-YTVSFIEGDGIGPEISKSVK(17):0	IDH2_YEAST	IDH2_YEAST	sp|P28241|IDH2_YEAST	sp|P28241|IDH2_YEAST	sp|P28241|IDH2_YEAST(57)-sp|P28241|IDH2_YEAST(53)	5	57	53	20623	4.48812	18016;	File: "Z:\alinden\DATA\2017\06_Jun\170619[Ridhima_TOMTIM]w and wo blocking protein\RAW\TOMTIM-\R_Gomkale_Linden_TOMTIM-_A10.raw"; ID: "18016"; scans: "20623"	5.18157
no	DSS	155	1155	7866.92	3.01508	0	none	Z:\alinden\DATA\2017\06_Jun\170619[Ridhima_TOMTIM]w and wo blocking protein\RAW\TOMTIM-\R_Gomkale_Linden_TOMTIM-_A10.raw;	1	Intra	15,C(Carbamidomethyl[C]);	2.54e-06	VVTNPSAYTDAVSVCPNLYGDILSDLNSGLSAGSLGLTPSANIGHKISIFEAVHGSAPDIAGQDK(46)-YTGKPNPSTGK(4):0	IDH2_YEAST	IDH2_YEAST	sp|P28241|IDH2_YEAST	sp|P28241|IDH2_YEAST	sp|P28241|IDH2_YEAST(288)-sp|P28241|IDH2_YEAST(29)	8	288	29	20629	5.59517	18022;	File: "Z:\alinden\DATA\2017\06_Jun\170619[Ridhima_TOMTIM]w and wo blocking protein\RAW\TOMTIM-\R_Gomkale_Linden_TOMTIM-_A10.raw"; ID: "18022"; scans: "20629"	383.065
no	DSS	156	1156	4753.39	3.00792	0	none	Z:\alinden\DATA\2017\06_Jun\170619[Ridhima_TOMTIM]w and wo blocking protein\RAW\TOMTIM-\R_Gomkale_Linden_TOMTIM-_A10.raw;	1	Intra	null	5.64e-09	VYVEESIYDKFIEEFKAASESIK(16)-YVDIGKNEGATLITGGER(6):0	ALDH4_YEAST	ALDH4_YEAST	sp|P46367|ALDH4_YEAST	sp|P46367|ALDH4_YEAST	sp|P46367|ALDH4_YEAST(345)-sp|P46367|ALDH4_YEAST(383)	20	345	383	20654	8.24872	18045;	File: "Z:\alinden\DATA\2017\06_Jun\170619[Ridhima_TOMTIM]w and wo blocking protein\RAW\TOMTIM-\R_Gomkale_Linden_TOMTIM-_A10.raw"; ID: "18045"; scans: "20654"	632.261
no	DSS	157	1157	4753.39	1.00613	0	none	Z:\alinden\DATA\2017\06_Jun\170619[Ridhima_TOMTIM]w and wo blocking protein\RAW\TOMTIM-\R_Gomkale_Linden_TOMTIM-_A10.raw;	1	Intra	null	8.28e-12	VYVEESIYDKFIEEFKAASESIK(16)-YVDIGKNEGATLITGGER(6):0	ALDH4_YEAST	ALDH4_YEAST	sp|P46367|ALDH4_YEAST	sp|P46367|ALDH4_YEAST	sp|P46367|ALDH4_YEAST(345)-sp|P46367|ALDH4_YEAST(383)	20	345	383	20693	11.082	18082;	File: "Z:\alinden\DATA\2017\06_Jun\170619[Ridhima_TOMTIM]w and wo blocking protein\RAW\TOMTIM-\R_Gomkale_Linden_TOMTIM-_A10.raw"; ID: "18082"; scans: "20693"	211.576
no	DSS	158	1158	7866.92	3.01142	0	none	Z:\alinden\DATA\2017\06_Jun\170619[Ridhima_TOMTIM]w and wo blocking protein\RAW\TOMTIM-\R_Gomkale_Linden_TOMTIM-_A10.raw;	1	Intra	15,C(Carbamidomethyl[C]);	6.97e-06	VVTNPSAYTDAVSVCPNLYGDILSDLNSGLSAGSLGLTPSANIGHKISIFEAVHGSAPDIAGQDK(46)-YTGKPNPSTGK(4):0	IDH2_YEAST	IDH2_YEAST	sp|P28241|IDH2_YEAST	sp|P28241|IDH2_YEAST	sp|P28241|IDH2_YEAST(288)-sp|P28241|IDH2_YEAST(29)	8	288	29	20756	5.15677	18141;	File: "Z:\alinden\DATA\2017\06_Jun\170619[Ridhima_TOMTIM]w and wo blocking protein\RAW\TOMTIM-\R_Gomkale_Linden_TOMTIM-_A10.raw"; ID: "18141"; scans: "20756"	382.6
no	DSS	159	1159	7866.92	1.04414	0	none	Z:\alinden\DATA\2017\06_Jun\170619[Ridhima_TOMTIM]w and wo blocking protein\RAW\TOMTIM-\R_Gomkale_Linden_TOMTIM-_A10.raw;	1	Intra	15,C(Carbamidomethyl[C]);	0.000992	VVTNPSAYTDAVSVCPNLYGDILSDLNSGLSAGSLGLTPSANIGHKISIFEAVHGSAPDIAGQDK(46)-YTGKPNPSTGK(4):0	IDH2_YEAST	IDH2_YEAST	sp|P28241|IDH2_YEAST	sp|P28241|IDH2_YEAST	sp|P28241|IDH2_YEAST(288)-sp|P28241|IDH2_YEAST(29)	8	288	29	20772	3.00349	18156;	File: "Z:\alinden\DATA\2017\06_Jun\170619[Ridhima_TOMTIM]w and wo blocking protein\RAW\TOMTIM-\R_Gomkale_Linden_TOMTIM-_A10.raw"; ID: "18156"; scans: "20772"	132.691
no	DSS	160	1160	3909.06	1.00328	0	none	Z:\alinden\DATA\2017\06_Jun\170619[Ridhima_TOMTIM]w and wo blocking protein\RAW\TOMTIM-\R_Gomkale_Linden_TOMTIM-_A10.raw;	1	Intra	null	3.79e-11	VYVEESIYDKFIEEFKAASESIK(16)-ILKYVDIGK(3):0	ALDH4_YEAST	ALDH4_YEAST	sp|P46367|ALDH4_YEAST	sp|P46367|ALDH4_YEAST	sp|P46367|ALDH4_YEAST(345)-sp|P46367|ALDH4_YEAST(377)	21	345	377	20805	10.4214	18187;	File: "Z:\alinden\DATA\2017\06_Jun\170619[Ridhima_TOMTIM]w and wo blocking protein\RAW\TOMTIM-\R_Gomkale_Linden_TOMTIM-_A10.raw"; ID: "18187"; scans: "20805"	256.523
no	DSS	161	1161	3909.06	2.00736	0	none	Z:\alinden\DATA\2017\06_Jun\170619[Ridhima_TOMTIM]w and wo blocking protein\RAW\TOMTIM-\R_Gomkale_Linden_TOMTIM-_A10.raw;	1	Intra	null	8.53e-10	VYVEESIYDKFIEEFKAASESIK(16)-ILKYVDIGK(3):0	ALDH4_YEAST	ALDH4_YEAST	sp|P46367|ALDH4_YEAST	sp|P46367|ALDH4_YEAST	sp|P46367|ALDH4_YEAST(345)-sp|P46367|ALDH4_YEAST(377)	21	345	377	20834	9.06905	18214;	File: "Z:\alinden\DATA\2017\06_Jun\170619[Ridhima_TOMTIM]w and wo blocking protein\RAW\TOMTIM-\R_Gomkale_Linden_TOMTIM-_A10.raw"; ID: "18214"; scans: "20834"	513.119
no	DSS	162	1162	3909.06	2.01003	0	none	Z:\alinden\DATA\2017\06_Jun\170619[Ridhima_TOMTIM]w and wo blocking protein\RAW\TOMTIM-\R_Gomkale_Linden_TOMTIM-_A10.raw;	1	Intra	null	1.77e-08	VYVEESIYDKFIEEFKAASESIK(16)-ILKYVDIGK(3):0	ALDH4_YEAST	ALDH4_YEAST	sp|P46367|ALDH4_YEAST	sp|P46367|ALDH4_YEAST	sp|P46367|ALDH4_YEAST(345)-sp|P46367|ALDH4_YEAST(377)	21	345	377	20854	7.75203	18233;	File: "Z:\alinden\DATA\2017\06_Jun\170619[Ridhima_TOMTIM]w and wo blocking protein\RAW\TOMTIM-\R_Gomkale_Linden_TOMTIM-_A10.raw"; ID: "18233"; scans: "20854"	513.801
no	DSS	163	1163	4753.39	1.99562	0	none	Z:\alinden\DATA\2017\06_Jun\170619[Ridhima_TOMTIM]w and wo blocking protein\RAW\TOMTIM-\R_Gomkale_Linden_TOMTIM-_A10.raw;	1	Intra	null	1.77e-05	VYVEESIYDKFIEEFKAASESIK(10)-YVDIGKNEGATLITGGER(6):0	ALDH4_YEAST	ALDH4_YEAST	sp|P46367|ALDH4_YEAST	sp|P46367|ALDH4_YEAST	sp|P46367|ALDH4_YEAST(339)-sp|P46367|ALDH4_YEAST(383)	1	339	383	20882	4.75203	18259;	File: "Z:\alinden\DATA\2017\06_Jun\170619[Ridhima_TOMTIM]w and wo blocking protein\RAW\TOMTIM-\R_Gomkale_Linden_TOMTIM-_A10.raw"; ID: "18259"; scans: "20882"	419.566
no	DSS	164	1164	3909.06	1.00644	0	none	Z:\alinden\DATA\2017\06_Jun\170619[Ridhima_TOMTIM]w and wo blocking protein\RAW\TOMTIM-\R_Gomkale_Linden_TOMTIM-_A10.raw;	1	Intra	null	1.7e-13	VYVEESIYDKFIEEFKAASESIK(16)-ILKYVDIGK(3):0	ALDH4_YEAST	ALDH4_YEAST	sp|P46367|ALDH4_YEAST	sp|P46367|ALDH4_YEAST	sp|P46367|ALDH4_YEAST(345)-sp|P46367|ALDH4_YEAST(377)	21	345	377	20932	12.7696	18306;	File: "Z:\alinden\DATA\2017\06_Jun\170619[Ridhima_TOMTIM]w and wo blocking protein\RAW\TOMTIM-\R_Gomkale_Linden_TOMTIM-_A10.raw"; ID: "18306"; scans: "20932"	257.331
no	DSS	165	1165	3909.06	0.9732	0	none	Z:\alinden\DATA\2017\06_Jun\170619[Ridhima_TOMTIM]w and wo blocking protein\RAW\TOMTIM-\R_Gomkale_Linden_TOMTIM-_A10.raw;	1	Intra	null	5.45e-10	VYVEESIYDKFIEEFKAASESIK(16)-ILKYVDIGK(3):0	ALDH4_YEAST	ALDH4_YEAST	sp|P46367|ALDH4_YEAST	sp|P46367|ALDH4_YEAST	sp|P46367|ALDH4_YEAST(345)-sp|P46367|ALDH4_YEAST(377)	21	345	377	20952	9.2636	18325;	File: "Z:\alinden\DATA\2017\06_Jun\170619[Ridhima_TOMTIM]w and wo blocking protein\RAW\TOMTIM-\R_Gomkale_Linden_TOMTIM-_A10.raw"; ID: "18325"; scans: "20952"	248.834
no	DSS	166	1166	6680.31	2.99932	0	none	Z:\alinden\DATA\2017\06_Jun\170619[Ridhima_TOMTIM]w and wo blocking protein\RAW\TOMTIM-\R_Gomkale_Linden_TOMTIM-_A10.raw;	1	Intra	null	4.13e-11	LHPLAGLDKGVEYLDLEEEQLSSLEGSQGLIPSR(9)-MSWLFGDKTPTDDANAAVGGQDTTKPK(1):0	TIM23_YEAST	TIM23_YEAST	sp|P32897|TIM23_YEAST	sp|P32897|TIM23_YEAST	sp|P32897|TIM23_YEAST(66)-sp|P32897|TIM23_YEAST(1)	6	66	1	21132	10.384	18494;	File: "Z:\alinden\DATA\2017\06_Jun\170619[Ridhima_TOMTIM]w and wo blocking protein\RAW\TOMTIM-\R_Gomkale_Linden_TOMTIM-_A10.raw"; ID: "18494"; scans: "21132"	448.71
no	DSS	167	1167	6680.31	1.99803	0	none	Z:\alinden\DATA\2017\06_Jun\170619[Ridhima_TOMTIM]w and wo blocking protein\RAW\TOMTIM-\R_Gomkale_Linden_TOMTIM-_A10.raw;	1	Intra	null	2.5e-07	LHPLAGLDKGVEYLDLEEEQLSSLEGSQGLIPSR(9)-MSWLFGDKTPTDDANAAVGGQDTTKPK(1):0	TIM23_YEAST	TIM23_YEAST	sp|P32897|TIM23_YEAST	sp|P32897|TIM23_YEAST	sp|P32897|TIM23_YEAST(66)-sp|P32897|TIM23_YEAST(1)	6	66	1	21166	6.60206	18526;	File: "Z:\alinden\DATA\2017\06_Jun\170619[Ridhima_TOMTIM]w and wo blocking protein\RAW\TOMTIM-\R_Gomkale_Linden_TOMTIM-_A10.raw"; ID: "18526"; scans: "21166"	298.958
no	DSS	168	1168	4862.43	0.02034	0	none	Z:\alinden\DATA\2017\06_Jun\170619[Ridhima_TOMTIM]w and wo blocking protein\RAW\TOMTIM-\R_Gomkale_Linden_TOMTIM-_A10.raw;	1	Intra	null	7.48e-10	VYVEESIYDKFIEEFKAASESIK(16)-GYFIKPTVFGDVKEDMR(13):0	ALDH4_YEAST	ALDH4_YEAST	sp|P46367|ALDH4_YEAST	sp|P46367|ALDH4_YEAST	sp|P46367|ALDH4_YEAST(345)-sp|P46367|ALDH4_YEAST(412)	10	345	412	21215	9.1261	18572;	File: "Z:\alinden\DATA\2017\06_Jun\170619[Ridhima_TOMTIM]w and wo blocking protein\RAW\TOMTIM-\R_Gomkale_Linden_TOMTIM-_A10.raw"; ID: "18572"; scans: "21215"	4.18221
no	DSS	169	1169	4862.43	2.00417	0	none	Z:\alinden\DATA\2017\06_Jun\170619[Ridhima_TOMTIM]w and wo blocking protein\RAW\TOMTIM-\R_Gomkale_Linden_TOMTIM-_A10.raw;	1	Intra	null	2.92e-07	VYVEESIYDKFIEEFKAASESIK(16)-GYFIKPTVFGDVKEDMR(13):0	ALDH4_YEAST	ALDH4_YEAST	sp|P46367|ALDH4_YEAST	sp|P46367|ALDH4_YEAST	sp|P46367|ALDH4_YEAST(345)-sp|P46367|ALDH4_YEAST(412)	10	345	412	21239	6.53462	18595;	File: "Z:\alinden\DATA\2017\06_Jun\170619[Ridhima_TOMTIM]w and wo blocking protein\RAW\TOMTIM-\R_Gomkale_Linden_TOMTIM-_A10.raw"; ID: "18595"; scans: "21239"	411.92
no	DSS	170	1170	4862.43	1.00439	0	none	Z:\alinden\DATA\2017\06_Jun\170619[Ridhima_TOMTIM]w and wo blocking protein\RAW\TOMTIM-\R_Gomkale_Linden_TOMTIM-_A10.raw;	1	Intra	null	2.72e-08	VYVEESIYDKFIEEFKAASESIK(16)-GYFIKPTVFGDVKEDMR(13):0	ALDH4_YEAST	ALDH4_YEAST	sp|P46367|ALDH4_YEAST	sp|P46367|ALDH4_YEAST	sp|P46367|ALDH4_YEAST(345)-sp|P46367|ALDH4_YEAST(412)	10	345	412	21285	7.56543	18638;	File: "Z:\alinden\DATA\2017\06_Jun\170619[Ridhima_TOMTIM]w and wo blocking protein\RAW\TOMTIM-\R_Gomkale_Linden_TOMTIM-_A10.raw"; ID: "18638"; scans: "21285"	206.476
no	DSS	171	1171	7498.9	0.00267	0	none	Z:\alinden\DATA\2017\06_Jun\170619[Ridhima_TOMTIM]w and wo blocking protein\RAW\TOMTIM-\R_Gomkale_Linden_TOMTIM-_A10.raw;	1	Inter	8,C(Carbamidomethyl[C]);32,M(Oxidation[M]);	0.000228	DIPAWKLCIFGALSGTALWLMVYPLDVIKSVMQTDNLQK(29)-KKTIGYVDSLSNGPNAMSFAILTDLQK(2):0	YMC1_YEAST	ULP1_YEAST	sp|P32331|YMC1_YEAST	sp|Q02724|ULP1_YEAST	sp|P32331|YMC1_YEAST(244)-sp|Q02724|ULP1_YEAST(525)	3	244	525	21295	3.64207	18647;	File: "Z:\alinden\DATA\2017\06_Jun\170619[Ridhima_TOMTIM]w and wo blocking protein\RAW\TOMTIM-\R_Gomkale_Linden_TOMTIM-_A10.raw"; ID: "18647"; scans: "21295"	0.356004
no	DSS	172	1172	6132.2	1.99485	0	none	Z:\alinden\DATA\2017\06_Jun\170619[Ridhima_TOMTIM]w and wo blocking protein\RAW\TOMTIM-\R_Gomkale_Linden_TOMTIM-_A10.raw;	1	Intra	null	1.72e-10	HVGLDIKGQNVANPTAMILSSTLMLNHLGLNEYATR(7)-FTVTLIPGDGVGKEITDSVR(13):0	IDH1_YEAST	IDH1_YEAST	sp|P28834|IDH1_YEAST	sp|P28834|IDH1_YEAST	sp|P28834|IDH1_YEAST(292)-sp|P28834|IDH1_YEAST(41)	2	292	41	21315	9.76447	18666;	File: "Z:\alinden\DATA\2017\06_Jun\170619[Ridhima_TOMTIM]w and wo blocking protein\RAW\TOMTIM-\R_Gomkale_Linden_TOMTIM-_A10.raw"; ID: "18666"; scans: "21315"	325.148
no	DSS	173	1173	6132.2	4.00186	0	none	Z:\alinden\DATA\2017\06_Jun\170619[Ridhima_TOMTIM]w and wo blocking protein\RAW\TOMTIM-\R_Gomkale_Linden_TOMTIM-_A10.raw;	1	Intra	null	4.73e-09	HVGLDIKGQNVANPTAMILSSTLMLNHLGLNEYATR(7)-FTVTLIPGDGVGKEITDSVR(13):0	IDH1_YEAST	IDH1_YEAST	sp|P28834|IDH1_YEAST	sp|P28834|IDH1_YEAST	sp|P28834|IDH1_YEAST(292)-sp|P28834|IDH1_YEAST(41)	2	292	41	21330	8.32514	18680;	File: "Z:\alinden\DATA\2017\06_Jun\170619[Ridhima_TOMTIM]w and wo blocking protein\RAW\TOMTIM-\R_Gomkale_Linden_TOMTIM-_A10.raw"; ID: "18680"; scans: "21330"	652.065
no	DSS	174	1174	6783.47	4.02138	0	none	Z:\alinden\DATA\2017\06_Jun\170619[Ridhima_TOMTIM]w and wo blocking protein\RAW\TOMTIM-\R_Gomkale_Linden_TOMTIM-_A10.raw;	1	Intra	null	5.17e-16	HVGLDIKGQNVANPTAMILSSTLMLNHLGLNEYATR(7)-TIFEAENIPIDWETINIKQTDHK(18):0	IDH1_YEAST	IDH1_YEAST	sp|P28834|IDH1_YEAST	sp|P28834|IDH1_YEAST	sp|P28834|IDH1_YEAST(292)-sp|P28834|IDH1_YEAST(66)	8	292	66	21335	15.2865	18685;	File: "Z:\alinden\DATA\2017\06_Jun\170619[Ridhima_TOMTIM]w and wo blocking protein\RAW\TOMTIM-\R_Gomkale_Linden_TOMTIM-_A10.raw"; ID: "18685"; scans: "21335"	592.382
no	DSS	175	1175	6783.47	1.99318	0	none	Z:\alinden\DATA\2017\06_Jun\170619[Ridhima_TOMTIM]w and wo blocking protein\RAW\TOMTIM-\R_Gomkale_Linden_TOMTIM-_A10.raw;	1	Intra	null	1.01e-13	HVGLDIKGQNVANPTAMILSSTLMLNHLGLNEYATR(7)-TIFEAENIPIDWETINIKQTDHK(18):0	IDH1_YEAST	IDH1_YEAST	sp|P28834|IDH1_YEAST	sp|P28834|IDH1_YEAST	sp|P28834|IDH1_YEAST(292)-sp|P28834|IDH1_YEAST(66)	8	292	66	21346	12.9957	18695;	File: "Z:\alinden\DATA\2017\06_Jun\170619[Ridhima_TOMTIM]w and wo blocking protein\RAW\TOMTIM-\R_Gomkale_Linden_TOMTIM-_A10.raw"; ID: "18695"; scans: "21346"	293.699
no	DSS	176	1176	5762.13	0.04517	0	none	Z:\alinden\DATA\2017\06_Jun\170619[Ridhima_TOMTIM]w and wo blocking protein\RAW\TOMTIM-\R_Gomkale_Linden_TOMTIM-_A10.raw;	1	Inter	5,C(Carbamidomethyl[C]);17,C(Carbamidomethyl[C]);	4.23e-05	KILICAEGLFSMEGTLCNLPKLVELK(1)-LDKIFTPINLNQSHWALGIIDLK(3):0	LCB2_YEAST	ULP1_YEAST	sp|P40970|LCB2_YEAST	sp|Q02724|ULP1_YEAST	sp|P40970|LCB2_YEAST(296)-sp|Q02724|ULP1_YEAST(503)	4	296	503	21651	4.37366	18982;	File: "Z:\alinden\DATA\2017\06_Jun\170619[Ridhima_TOMTIM]w and wo blocking protein\RAW\TOMTIM-\R_Gomkale_Linden_TOMTIM-_A10.raw"; ID: "18982"; scans: "21651"	7.83769
no	DSS	177	1177	5210.68	-0.00567	0	none	Z:\alinden\DATA\2017\06_Jun\170619[Ridhima_TOMTIM]w and wo blocking protein\RAW\TOMTIM-\R_Gomkale_Linden_TOMTIM-_A10.raw;	1	Intra	null	1.86e-11	ESALELGVLTEKEFDEWVVPEHMLGPK(27)-SLMLVTALNPKIGYDAASK(11):0	FUMH_YEAST	FUMH_YEAST	sp|P08417|FUMH_YEAST	sp|P08417|FUMH_YEAST	sp|P08417|FUMH_YEAST(488)-sp|P08417|FUMH_YEAST(440)	7	488	440	21783	10.7305	19106;	File: "Z:\alinden\DATA\2017\06_Jun\170619[Ridhima_TOMTIM]w and wo blocking protein\RAW\TOMTIM-\R_Gomkale_Linden_TOMTIM-_A10.raw"; ID: "19106"; scans: "21783"	-1.08794
no	DSS	178	1178	5210.68	2.00236	0	none	Z:\alinden\DATA\2017\06_Jun\170619[Ridhima_TOMTIM]w and wo blocking protein\RAW\TOMTIM-\R_Gomkale_Linden_TOMTIM-_A10.raw;	1	Intra	null	1.01e-11	ESALELGVLTEKEFDEWVVPEHMLGPK(27)-SLMLVTALNPKIGYDAASK(11):0	FUMH_YEAST	FUMH_YEAST	sp|P08417|FUMH_YEAST	sp|P08417|FUMH_YEAST	sp|P08417|FUMH_YEAST(488)-sp|P08417|FUMH_YEAST(440)	7	488	440	21824	10.9957	19145;	File: "Z:\alinden\DATA\2017\06_Jun\170619[Ridhima_TOMTIM]w and wo blocking protein\RAW\TOMTIM-\R_Gomkale_Linden_TOMTIM-_A10.raw"; ID: "19145"; scans: "21824"	384.058
no	DSS	179	1179	5581.8	1.9547	0	none	Z:\alinden\DATA\2017\06_Jun\170619[Ridhima_TOMTIM]w and wo blocking protein\RAW\TOMTIM-\R_Gomkale_Linden_TOMTIM-_A10.raw;	1	Inter	14,C(Carbamidomethyl[C]);	0.000278	NHFTYSIKEPLGVCGQIIPWNFPLLMWSWK(8)-KPNESIFSEFKGSSAR(11):0	ALDH5_YEAST	ODO1_YEAST	sp|P40047|ALDH5_YEAST	sp|P20967|ODO1_YEAST	sp|P40047|ALDH5_YEAST(177)-sp|P20967|ODO1_YEAST(328)	1	177	328	21900	3.55596	19216;	File: "Z:\alinden\DATA\2017\06_Jun\170619[Ridhima_TOMTIM]w and wo blocking protein\RAW\TOMTIM-\R_Gomkale_Linden_TOMTIM-_A10.raw"; ID: "19216"; scans: "21900"	350.006
no	DSS	180	1180	5642.79	-0.01433	0	none	Z:\alinden\DATA\2017\06_Jun\170619[Ridhima_TOMTIM]w and wo blocking protein\RAW\TOMTIM-\R_Gomkale_Linden_TOMTIM-_A10.raw;	1	Intra	null	1.65e-12	VGDPFDESTFQGAQTSQMQLNKILK(22)-VYVEESIYDKFIEEFKAASESIK(16):0	ALDH4_YEAST	ALDH4_YEAST	sp|P46367|ALDH4_YEAST	sp|P46367|ALDH4_YEAST	sp|P46367|ALDH4_YEAST(374)-sp|P46367|ALDH4_YEAST(345)	10	374	345	21979	11.7825	19290;	File: "Z:\alinden\DATA\2017\06_Jun\170619[Ridhima_TOMTIM]w and wo blocking protein\RAW\TOMTIM-\R_Gomkale_Linden_TOMTIM-_A10.raw"; ID: "19290"; scans: "21979"	-2.53908
no	DSS	181	1181	5642.79	2.99441	0	none	Z:\alinden\DATA\2017\06_Jun\170619[Ridhima_TOMTIM]w and wo blocking protein\RAW\TOMTIM-\R_Gomkale_Linden_TOMTIM-_A10.raw;	1	Intra	null	9.01e-16	VGDPFDESTFQGAQTSQMQLNKILK(22)-VYVEESIYDKFIEEFKAASESIK(16):0	ALDH4_YEAST	ALDH4_YEAST	sp|P46367|ALDH4_YEAST	sp|P46367|ALDH4_YEAST	sp|P46367|ALDH4_YEAST(374)-sp|P46367|ALDH4_YEAST(345)	10	374	345	21990	15.0453	19301;	File: "Z:\alinden\DATA\2017\06_Jun\170619[Ridhima_TOMTIM]w and wo blocking protein\RAW\TOMTIM-\R_Gomkale_Linden_TOMTIM-_A10.raw"; ID: "19301"; scans: "21990"	530.285
no	DSS	182	1182	4739.68	4.00867	0	none	Z:\alinden\DATA\2017\06_Jun\170619[Ridhima_TOMTIM]w and wo blocking protein\RAW\TOMTIM-\R_Gomkale_Linden_TOMTIM-_A10.raw;	1	Intra	null	0.000758	NVLIEQPFGPPKITKDGVTVAK(12)-ASLLKGVETLAEAVAATLGPKGR(21):0	HSP60_YEAST	HSP60_YEAST	sp|P19882|HSP60_YEAST	sp|P19882|HSP60_YEAST	sp|P19882|HSP60_YEAST(69)-sp|P19882|HSP60_YEAST(55)	1	69	55	22002	3.12033	19312;	File: "Z:\alinden\DATA\2017\06_Jun\170619[Ridhima_TOMTIM]w and wo blocking protein\RAW\TOMTIM-\R_Gomkale_Linden_TOMTIM-_A10.raw"; ID: "19312"; scans: "22002"	844.873
no	DSS	183	1183	5317.92	3.00859	0	none	Z:\alinden\DATA\2017\06_Jun\170619[Ridhima_TOMTIM]w and wo blocking protein\RAW\TOMTIM-\R_Gomkale_Linden_TOMTIM-_A10.raw;	1	Intra	null	1.14e-12	VTAVIGAIVDVHFEQSELPAILNALEIKTPQGK(28)-GEKVLDTGGPISVPVGR(3):0	ATPB_YEAST	ATPB_YEAST	sp|P00830|ATPB_YEAST	sp|P00830|ATPB_YEAST	sp|P00830|ATPB_YEAST(73)-sp|P00830|ATPB_YEAST(108)	17	73	108	22086	11.9431	19391;	File: "Z:\alinden\DATA\2017\06_Jun\170619[Ridhima_TOMTIM]w and wo blocking protein\RAW\TOMTIM-\R_Gomkale_Linden_TOMTIM-_A10.raw"; ID: "19391"; scans: "22086"	565.319
no	DSS	184	1184	4727.47	1.00384	0	none	Z:\alinden\DATA\2017\06_Jun\170619[Ridhima_TOMTIM]w and wo blocking protein\RAW\TOMTIM-\R_Gomkale_Linden_TOMTIM-_A10.raw;	1	Inter	null	0.00203	LAELIEQDKDVIASIETLDNGK(9)-KVYPSAVLHFEDFGVKNAR(1):0	ALDH4_YEAST	MAOM_YEAST	sp|P46367|ALDH4_YEAST	sp|P36013|MAOM_YEAST	sp|P46367|ALDH4_YEAST(123)-sp|P36013|MAOM_YEAST(320)	2	123	320	22097	2.6925	19401;	File: "Z:\alinden\DATA\2017\06_Jun\170619[Ridhima_TOMTIM]w and wo blocking protein\RAW\TOMTIM-\R_Gomkale_Linden_TOMTIM-_A10.raw"; ID: "19401"; scans: "22097"	212.252
no	DSS	185	1185	5317.92	0.00113	0	none	Z:\alinden\DATA\2017\06_Jun\170619[Ridhima_TOMTIM]w and wo blocking protein\RAW\TOMTIM-\R_Gomkale_Linden_TOMTIM-_A10.raw;	1	Intra	null	5.49e-15	VTAVIGAIVDVHFEQSELPAILNALEIKTPQGK(28)-GEKVLDTGGPISVPVGR(3):0	ATPB_YEAST	ATPB_YEAST	sp|P00830|ATPB_YEAST	sp|P00830|ATPB_YEAST	sp|P00830|ATPB_YEAST(73)-sp|P00830|ATPB_YEAST(108)	17	73	108	22098	14.2604	19402;	File: "Z:\alinden\DATA\2017\06_Jun\170619[Ridhima_TOMTIM]w and wo blocking protein\RAW\TOMTIM-\R_Gomkale_Linden_TOMTIM-_A10.raw"; ID: "19402"; scans: "22098"	0.212449
no	DSS	186	1186	4727.47	3.01591	0	none	Z:\alinden\DATA\2017\06_Jun\170619[Ridhima_TOMTIM]w and wo blocking protein\RAW\TOMTIM-\R_Gomkale_Linden_TOMTIM-_A10.raw;	1	Inter	null	3.3e-05	LAELIEQDKDVIASIETLDNGK(9)-KVYPSAVLHFEDFGVKNAR(1):0	ALDH4_YEAST	MAOM_YEAST	sp|P46367|ALDH4_YEAST	sp|P36013|MAOM_YEAST	sp|P46367|ALDH4_YEAST(123)-sp|P36013|MAOM_YEAST(320)	2	123	320	22103	4.48149	19407;	File: "Z:\alinden\DATA\2017\06_Jun\170619[Ridhima_TOMTIM]w and wo blocking protein\RAW\TOMTIM-\R_Gomkale_Linden_TOMTIM-_A10.raw"; ID: "19407"; scans: "22103"	637.412
no	DSS	187	1187	6774.59	2.02375	0	none	Z:\alinden\DATA\2017\06_Jun\170619[Ridhima_TOMTIM]w and wo blocking protein\RAW\TOMTIM-\R_Gomkale_Linden_TOMTIM-_A10.raw;	1	Intra	14,C(Carbamidomethyl[C]);	0.000138	IFSAANVPIEWESCDVSPIFVNGLTTIPDPAVQSITKNLVALKGPLATPIGK(37)-YTGKPNPSTGK(4):0	IDH2_YEAST	IDH2_YEAST	sp|P28241|IDH2_YEAST	sp|P28241|IDH2_YEAST	sp|P28241|IDH2_YEAST(94)-sp|P28241|IDH2_YEAST(29)	1	94	29	22126	3.86012	19428;	File: "Z:\alinden\DATA\2017\06_Jun\170619[Ridhima_TOMTIM]w and wo blocking protein\RAW\TOMTIM-\R_Gomkale_Linden_TOMTIM-_A10.raw"; ID: "19428"; scans: "22126"	298.593
no	DSS	188	1188	4519.39	-0.00413	0	none	Z:\alinden\DATA\2017\06_Jun\170619[Ridhima_TOMTIM]w and wo blocking protein\RAW\TOMTIM-\R_Gomkale_Linden_TOMTIM-_A10.raw;	1	Intra	null	9.59e-13	VYVEESIYDKFIEEFKAASESIK(16)-IVKEEIFGPVVTVTK(3):0	ALDH4_YEAST	ALDH4_YEAST	sp|P46367|ALDH4_YEAST	sp|P46367|ALDH4_YEAST	sp|P46367|ALDH4_YEAST(345)-sp|P46367|ALDH4_YEAST(419)	19	345	419	22138	12.0182	19439;	File: "Z:\alinden\DATA\2017\06_Jun\170619[Ridhima_TOMTIM]w and wo blocking protein\RAW\TOMTIM-\R_Gomkale_Linden_TOMTIM-_A10.raw"; ID: "19439"; scans: "22138"	-0.913637
no	DSS	189	1189	4519.39	1.00572	0	none	Z:\alinden\DATA\2017\06_Jun\170619[Ridhima_TOMTIM]w and wo blocking protein\RAW\TOMTIM-\R_Gomkale_Linden_TOMTIM-_A10.raw;	1	Intra	null	3.18e-10	VYVEESIYDKFIEEFKAASESIK(16)-IVKEEIFGPVVTVTK(3):0	ALDH4_YEAST	ALDH4_YEAST	sp|P46367|ALDH4_YEAST	sp|P46367|ALDH4_YEAST	sp|P46367|ALDH4_YEAST(345)-sp|P46367|ALDH4_YEAST(419)	19	345	419	22163	9.49757	19463;	File: "Z:\alinden\DATA\2017\06_Jun\170619[Ridhima_TOMTIM]w and wo blocking protein\RAW\TOMTIM-\R_Gomkale_Linden_TOMTIM-_A10.raw"; ID: "19463"; scans: "22163"	222.435
no	DSS	190	1190	6077.18	2.99116	0	none	Z:\alinden\DATA\2017\06_Jun\170619[Ridhima_TOMTIM]w and wo blocking protein\RAW\TOMTIM-\R_Gomkale_Linden_TOMTIM-_A10.raw;	1	Intra	30,C(Carbamidomethyl[C]);31,C(Carbamidomethyl[C]);	9.68e-09	SPNIVFADAELKKAVQNIILGIYYNSGEVCCAGSR(13)-HIYQSAAAGLKKVTLELGGK(12):0	ALDH4_YEAST	ALDH4_YEAST	sp|P46367|ALDH4_YEAST	sp|P46367|ALDH4_YEAST	sp|P46367|ALDH4_YEAST(307)-sp|P46367|ALDH4_YEAST(286)	5	307	286	22164	8.01412	19464;	File: "Z:\alinden\DATA\2017\06_Jun\170619[Ridhima_TOMTIM]w and wo blocking protein\RAW\TOMTIM-\R_Gomkale_Linden_TOMTIM-_A10.raw"; ID: "19464"; scans: "22164"	491.872
no	DSS	191	1191	4519.39	2.00009	0	none	Z:\alinden\DATA\2017\06_Jun\170619[Ridhima_TOMTIM]w and wo blocking protein\RAW\TOMTIM-\R_Gomkale_Linden_TOMTIM-_A10.raw;	1	Intra	null	5.57e-18	VYVEESIYDKFIEEFKAASESIK(16)-IVKEEIFGPVVTVTK(3):0	ALDH4_YEAST	ALDH4_YEAST	sp|P46367|ALDH4_YEAST	sp|P46367|ALDH4_YEAST	sp|P46367|ALDH4_YEAST(345)-sp|P46367|ALDH4_YEAST(419)	19	345	419	22208	17.2541	19505;	File: "Z:\alinden\DATA\2017\06_Jun\170619[Ridhima_TOMTIM]w and wo blocking protein\RAW\TOMTIM-\R_Gomkale_Linden_TOMTIM-_A10.raw"; ID: "19505"; scans: "22208"	442.263
no	DSS	192	1192	5762.13	1.04901	0	none	Z:\alinden\DATA\2017\06_Jun\170619[Ridhima_TOMTIM]w and wo blocking protein\RAW\TOMTIM-\R_Gomkale_Linden_TOMTIM-_A10.raw;	1	Inter	5,C(Carbamidomethyl[C]);17,C(Carbamidomethyl[C]);	0.00182	KILICAEGLFSMEGTLCNLPKLVELK(1)-LDKIFTPINLNQSHWALGIIDLK(3):0	LCB2_YEAST	ULP1_YEAST	sp|P40970|LCB2_YEAST	sp|Q02724|ULP1_YEAST	sp|P40970|LCB2_YEAST(296)-sp|Q02724|ULP1_YEAST(503)	4	296	503	22228	2.73993	19524;	File: "Z:\alinden\DATA\2017\06_Jun\170619[Ridhima_TOMTIM]w and wo blocking protein\RAW\TOMTIM-\R_Gomkale_Linden_TOMTIM-_A10.raw"; ID: "19524"; scans: "22228"	181.988
no	DSS	193	1193	5317.92	3.00739	0	none	Z:\alinden\DATA\2017\06_Jun\170619[Ridhima_TOMTIM]w and wo blocking protein\RAW\TOMTIM-\R_Gomkale_Linden_TOMTIM-_A10.raw;	1	Intra	null	1.84e-11	VTAVIGAIVDVHFEQSELPAILNALEIKTPQGK(28)-GEKVLDTGGPISVPVGR(3):0	ATPB_YEAST	ATPB_YEAST	sp|P00830|ATPB_YEAST	sp|P00830|ATPB_YEAST	sp|P00830|ATPB_YEAST(73)-sp|P00830|ATPB_YEAST(108)	17	73	108	22229	10.7352	19525;	File: "Z:\alinden\DATA\2017\06_Jun\170619[Ridhima_TOMTIM]w and wo blocking protein\RAW\TOMTIM-\R_Gomkale_Linden_TOMTIM-_A10.raw"; ID: "19525"; scans: "22229"	565.094
no	DSS	194	1194	4331.22	1.0056	0	none	Z:\alinden\DATA\2017\06_Jun\170619[Ridhima_TOMTIM]w and wo blocking protein\RAW\TOMTIM-\R_Gomkale_Linden_TOMTIM-_A10.raw;	1	Intra	null	4.36e-15	VYVEESIYDKFIEEFKAASESIK(16)-GYFIKPTVFGDVK(5):0	ALDH4_YEAST	ALDH4_YEAST	sp|P46367|ALDH4_YEAST	sp|P46367|ALDH4_YEAST	sp|P46367|ALDH4_YEAST(345)-sp|P46367|ALDH4_YEAST(404)	36	345	404	22250	14.3605	19544;	File: "Z:\alinden\DATA\2017\06_Jun\170619[Ridhima_TOMTIM]w and wo blocking protein\RAW\TOMTIM-\R_Gomkale_Linden_TOMTIM-_A10.raw"; ID: "19544"; scans: "22250"	232.067
no	DSS	195	1195	4331.22	-0.00218	0	none	Z:\alinden\DATA\2017\06_Jun\170619[Ridhima_TOMTIM]w and wo blocking protein\RAW\TOMTIM-\R_Gomkale_Linden_TOMTIM-_A10.raw;	1	Intra	null	2.27e-08	VYVEESIYDKFIEEFKAASESIK(16)-GYFIKPTVFGDVK(5):0	ALDH4_YEAST	ALDH4_YEAST	sp|P46367|ALDH4_YEAST	sp|P46367|ALDH4_YEAST	sp|P46367|ALDH4_YEAST(345)-sp|P46367|ALDH4_YEAST(404)	36	345	404	22253	7.64397	19547;	File: "Z:\alinden\DATA\2017\06_Jun\170619[Ridhima_TOMTIM]w and wo blocking protein\RAW\TOMTIM-\R_Gomkale_Linden_TOMTIM-_A10.raw"; ID: "19547"; scans: "22253"	-0.503206
no	DSS	196	1196	4331.22	0.00391	0	none	Z:\alinden\DATA\2017\06_Jun\170619[Ridhima_TOMTIM]w and wo blocking protein\RAW\TOMTIM-\R_Gomkale_Linden_TOMTIM-_A10.raw;	1	Intra	null	7.1e-18	VYVEESIYDKFIEEFKAASESIK(16)-GYFIKPTVFGDVK(5):0	ALDH4_YEAST	ALDH4_YEAST	sp|P46367|ALDH4_YEAST	sp|P46367|ALDH4_YEAST	sp|P46367|ALDH4_YEAST(345)-sp|P46367|ALDH4_YEAST(404)	36	345	404	22265	17.1487	19558;	File: "Z:\alinden\DATA\2017\06_Jun\170619[Ridhima_TOMTIM]w and wo blocking protein\RAW\TOMTIM-\R_Gomkale_Linden_TOMTIM-_A10.raw"; ID: "19558"; scans: "22265"	0.902538
no	DSS	197	1197	4519.39	1.00367	0	none	Z:\alinden\DATA\2017\06_Jun\170619[Ridhima_TOMTIM]w and wo blocking protein\RAW\TOMTIM-\R_Gomkale_Linden_TOMTIM-_A10.raw;	1	Intra	null	4.1e-12	VYVEESIYDKFIEEFKAASESIK(16)-IVKEEIFGPVVTVTK(3):0	ALDH4_YEAST	ALDH4_YEAST	sp|P46367|ALDH4_YEAST	sp|P46367|ALDH4_YEAST	sp|P46367|ALDH4_YEAST(345)-sp|P46367|ALDH4_YEAST(419)	19	345	419	22272	11.3872	19565;	File: "Z:\alinden\DATA\2017\06_Jun\170619[Ridhima_TOMTIM]w and wo blocking protein\RAW\TOMTIM-\R_Gomkale_Linden_TOMTIM-_A10.raw"; ID: "19565"; scans: "22272"	221.982
no	DSS	198	1198	4519.39	3.01682	0	none	Z:\alinden\DATA\2017\06_Jun\170619[Ridhima_TOMTIM]w and wo blocking protein\RAW\TOMTIM-\R_Gomkale_Linden_TOMTIM-_A10.raw;	1	Intra	null	1.61e-08	VYVEESIYDKFIEEFKAASESIK(16)-IVKEEIFGPVVTVTK(3):0	ALDH4_YEAST	ALDH4_YEAST	sp|P46367|ALDH4_YEAST	sp|P46367|ALDH4_YEAST	sp|P46367|ALDH4_YEAST(345)-sp|P46367|ALDH4_YEAST(419)	19	345	419	22288	7.79317	19580;	File: "Z:\alinden\DATA\2017\06_Jun\170619[Ridhima_TOMTIM]w and wo blocking protein\RAW\TOMTIM-\R_Gomkale_Linden_TOMTIM-_A10.raw"; ID: "19580"; scans: "22288"	666.934
no	DSS	199	1199	4331.22	0.00391	0	none	Z:\alinden\DATA\2017\06_Jun\170619[Ridhima_TOMTIM]w and wo blocking protein\RAW\TOMTIM-\R_Gomkale_Linden_TOMTIM-_A10.raw;	1	Intra	null	8.47e-09	VYVEESIYDKFIEEFKAASESIK(16)-GYFIKPTVFGDVK(5):0	ALDH4_YEAST	ALDH4_YEAST	sp|P46367|ALDH4_YEAST	sp|P46367|ALDH4_YEAST	sp|P46367|ALDH4_YEAST(345)-sp|P46367|ALDH4_YEAST(404)	36	345	404	22385	8.07212	19670;	File: "Z:\alinden\DATA\2017\06_Jun\170619[Ridhima_TOMTIM]w and wo blocking protein\RAW\TOMTIM-\R_Gomkale_Linden_TOMTIM-_A10.raw"; ID: "19670"; scans: "22385"	0.902538
no	DSS	200	1200	4331.22	0.00207	0	none	Z:\alinden\DATA\2017\06_Jun\170619[Ridhima_TOMTIM]w and wo blocking protein\RAW\TOMTIM-\R_Gomkale_Linden_TOMTIM-_A10.raw;	1	Intra	null	7.39e-09	VYVEESIYDKFIEEFKAASESIK(16)-GYFIKPTVFGDVK(5):0	ALDH4_YEAST	ALDH4_YEAST	sp|P46367|ALDH4_YEAST	sp|P46367|ALDH4_YEAST	sp|P46367|ALDH4_YEAST(345)-sp|P46367|ALDH4_YEAST(404)	36	345	404	22394	8.13136	19679;	File: "Z:\alinden\DATA\2017\06_Jun\170619[Ridhima_TOMTIM]w and wo blocking protein\RAW\TOMTIM-\R_Gomkale_Linden_TOMTIM-_A10.raw"; ID: "19679"; scans: "22394"	0.477814
no	DSS	201	1201	4331.22	1.01952	0	none	Z:\alinden\DATA\2017\06_Jun\170619[Ridhima_TOMTIM]w and wo blocking protein\RAW\TOMTIM-\R_Gomkale_Linden_TOMTIM-_A10.raw;	1	Intra	null	1.82e-19	VYVEESIYDKFIEEFKAASESIK(16)-GYFIKPTVFGDVK(5):0	ALDH4_YEAST	ALDH4_YEAST	sp|P46367|ALDH4_YEAST	sp|P46367|ALDH4_YEAST	sp|P46367|ALDH4_YEAST(345)-sp|P46367|ALDH4_YEAST(404)	36	345	404	22403	18.7399	19687;	File: "Z:\alinden\DATA\2017\06_Jun\170619[Ridhima_TOMTIM]w and wo blocking protein\RAW\TOMTIM-\R_Gomkale_Linden_TOMTIM-_A10.raw"; ID: "19687"; scans: "22403"	235.279
no	DSS	202	1202	4609.54	0.03684	0	none	Z:\alinden\DATA\2017\06_Jun\170619[Ridhima_TOMTIM]w and wo blocking protein\RAW\TOMTIM-\R_Gomkale_Linden_TOMTIM-_A10.raw;	1	Intra	null	8.26e-07	YIPQAGIPPGVINIVSGFGKIVGEAITNHPK(20)-HIYQSAAAGLKK(11):0	ALDH4_YEAST	ALDH4_YEAST	sp|P46367|ALDH4_YEAST	sp|P46367|ALDH4_YEAST	sp|P46367|ALDH4_YEAST(249)-sp|P46367|ALDH4_YEAST(285)	16	249	285	22431	6.08302	19714;	File: "Z:\alinden\DATA\2017\06_Jun\170619[Ridhima_TOMTIM]w and wo blocking protein\RAW\TOMTIM-\R_Gomkale_Linden_TOMTIM-_A10.raw"; ID: "19714"; scans: "22431"	7.99031
no	DSS	203	1203	4609.54	3.02393	0	none	Z:\alinden\DATA\2017\06_Jun\170619[Ridhima_TOMTIM]w and wo blocking protein\RAW\TOMTIM-\R_Gomkale_Linden_TOMTIM-_A10.raw;	1	Intra	null	2.29e-05	YIPQAGIPPGVINIVSGFGKIVGEAITNHPK(20)-HIYQSAAAGLKK(11):0	ALDH4_YEAST	ALDH4_YEAST	sp|P46367|ALDH4_YEAST	sp|P46367|ALDH4_YEAST	sp|P46367|ALDH4_YEAST(249)-sp|P46367|ALDH4_YEAST(285)	16	249	285	22476	4.64016	19756;	File: "Z:\alinden\DATA\2017\06_Jun\170619[Ridhima_TOMTIM]w and wo blocking protein\RAW\TOMTIM-\R_Gomkale_Linden_TOMTIM-_A10.raw"; ID: "19756"; scans: "22476"	655.442
no	DSS	204	1204	4331.22	1.01223	0	none	Z:\alinden\DATA\2017\06_Jun\170619[Ridhima_TOMTIM]w and wo blocking protein\RAW\TOMTIM-\R_Gomkale_Linden_TOMTIM-_A10.raw;	1	Intra	null	1.52e-12	VYVEESIYDKFIEEFKAASESIK(16)-GYFIKPTVFGDVK(5):0	ALDH4_YEAST	ALDH4_YEAST	sp|P46367|ALDH4_YEAST	sp|P46367|ALDH4_YEAST	sp|P46367|ALDH4_YEAST(345)-sp|P46367|ALDH4_YEAST(404)	36	345	404	22509	11.8182	19787;	File: "Z:\alinden\DATA\2017\06_Jun\170619[Ridhima_TOMTIM]w and wo blocking protein\RAW\TOMTIM-\R_Gomkale_Linden_TOMTIM-_A10.raw"; ID: "19787"; scans: "22509"	233.597
no	DSS	205	1205	4609.54	2.00774	0	none	Z:\alinden\DATA\2017\06_Jun\170619[Ridhima_TOMTIM]w and wo blocking protein\RAW\TOMTIM-\R_Gomkale_Linden_TOMTIM-_A10.raw;	1	Intra	null	2.03e-11	YIPQAGIPPGVINIVSGFGKIVGEAITNHPK(20)-HIYQSAAAGLKK(11):0	ALDH4_YEAST	ALDH4_YEAST	sp|P46367|ALDH4_YEAST	sp|P46367|ALDH4_YEAST	sp|P46367|ALDH4_YEAST(249)-sp|P46367|ALDH4_YEAST(285)	16	249	285	22512	10.6925	19790;	File: "Z:\alinden\DATA\2017\06_Jun\170619[Ridhima_TOMTIM]w and wo blocking protein\RAW\TOMTIM-\R_Gomkale_Linden_TOMTIM-_A10.raw"; ID: "19790"; scans: "22512"	435.277
no	DSS	206	1206	4331.22	3.01615	0	none	Z:\alinden\DATA\2017\06_Jun\170619[Ridhima_TOMTIM]w and wo blocking protein\RAW\TOMTIM-\R_Gomkale_Linden_TOMTIM-_A10.raw;	1	Intra	null	5.38e-11	VYVEESIYDKFIEEFKAASESIK(16)-GYFIKPTVFGDVK(5):0	ALDH4_YEAST	ALDH4_YEAST	sp|P46367|ALDH4_YEAST	sp|P46367|ALDH4_YEAST	sp|P46367|ALDH4_YEAST(345)-sp|P46367|ALDH4_YEAST(404)	36	345	404	22534	10.2692	19811;	File: "Z:\alinden\DATA\2017\06_Jun\170619[Ridhima_TOMTIM]w and wo blocking protein\RAW\TOMTIM-\R_Gomkale_Linden_TOMTIM-_A10.raw"; ID: "19811"; scans: "22534"	695.728
no	DSS	207	1207	4609.54	0.00874	0	none	Z:\alinden\DATA\2017\06_Jun\170619[Ridhima_TOMTIM]w and wo blocking protein\RAW\TOMTIM-\R_Gomkale_Linden_TOMTIM-_A10.raw;	1	Intra	null	4.08e-15	YIPQAGIPPGVINIVSGFGKIVGEAITNHPK(20)-HIYQSAAAGLKK(11):0	ALDH4_YEAST	ALDH4_YEAST	sp|P46367|ALDH4_YEAST	sp|P46367|ALDH4_YEAST	sp|P46367|ALDH4_YEAST(249)-sp|P46367|ALDH4_YEAST(285)	16	249	285	22553	14.3893	19828;	File: "Z:\alinden\DATA\2017\06_Jun\170619[Ridhima_TOMTIM]w and wo blocking protein\RAW\TOMTIM-\R_Gomkale_Linden_TOMTIM-_A10.raw"; ID: "19828"; scans: "22553"	1.89565
no	DSS	208	1208	4609.54	2.00405	0	none	Z:\alinden\DATA\2017\06_Jun\170619[Ridhima_TOMTIM]w and wo blocking protein\RAW\TOMTIM-\R_Gomkale_Linden_TOMTIM-_A10.raw;	1	Intra	null	1.22e-08	YIPQAGIPPGVINIVSGFGKIVGEAITNHPK(20)-HIYQSAAAGLKK(11):0	ALDH4_YEAST	ALDH4_YEAST	sp|P46367|ALDH4_YEAST	sp|P46367|ALDH4_YEAST	sp|P46367|ALDH4_YEAST(249)-sp|P46367|ALDH4_YEAST(285)	16	249	285	22613	7.91364	19885;	File: "Z:\alinden\DATA\2017\06_Jun\170619[Ridhima_TOMTIM]w and wo blocking protein\RAW\TOMTIM-\R_Gomkale_Linden_TOMTIM-_A10.raw"; ID: "19885"; scans: "22613"	434.477
no	DSS	209	1209	6702.58	3.99722	0	none	Z:\alinden\DATA\2017\06_Jun\170619[Ridhima_TOMTIM]w and wo blocking protein\RAW\TOMTIM-\R_Gomkale_Linden_TOMTIM-_A10.raw;	1	Inter	2,M(Oxidation[M]);28,M(Oxidation[M]);	0.00969	VMFFLPWQGKVLAGTTDIPLKQVPENPMPTEADIQDILK(10)-GIHIIDLNQTLSYLKRAAK(15):0	GPDM_YEAST	RT04_YEAST	sp|P32191|GPDM_YEAST	sp|P32902|RT04_YEAST	sp|P32191|GPDM_YEAST(367)-sp|P32902|RT04_YEAST(230)	1	367	230	22659	2.01368	19928;	File: "Z:\alinden\DATA\2017\06_Jun\170619[Ridhima_TOMTIM]w and wo blocking protein\RAW\TOMTIM-\R_Gomkale_Linden_TOMTIM-_A10.raw"; ID: "19928"; scans: "22659"	595.925
no	DSS	210	1210	7146.61	0.94285	0	none	Z:\alinden\DATA\2017\06_Jun\170619[Ridhima_TOMTIM]w and wo blocking protein\RAW\TOMTIM-\R_Gomkale_Linden_TOMTIM-_A10.raw;	1	Intra	null	4e-10	LAGAEEWTQNYVALLAQNYHLSSKMSNYLVQNYGTR(24)-TSDGRVMFFLPWQGKVLAGTTDIPLK(15):0	GPDM_YEAST	GPDM_YEAST	sp|P32191|GPDM_YEAST	sp|P32191|GPDM_YEAST	sp|P32191|GPDM_YEAST(518)-sp|P32191|GPDM_YEAST(367)	1	518	367	22785	9.39794	20046;	File: "Z:\alinden\DATA\2017\06_Jun\170619[Ridhima_TOMTIM]w and wo blocking protein\RAW\TOMTIM-\R_Gomkale_Linden_TOMTIM-_A10.raw"; ID: "20046"; scans: "22785"	131.894
no	DSS	211	1211	7543.75	2.97296	0	none	Z:\alinden\DATA\2017\06_Jun\170619[Ridhima_TOMTIM]w and wo blocking protein\RAW\TOMTIM-\R_Gomkale_Linden_TOMTIM-_A10.raw;	1	Intra	17,C(Carbamidomethyl[C]);	7.4e-11	QNKTFEVINPSTEEEICHIYEGREDDVEEAVQAADR(3)-YIPQAGIPPGVINIVSGFGKIVGEAITNHPK(20):0	ALDH4_YEAST	ALDH4_YEAST	sp|P46367|ALDH4_YEAST	sp|P46367|ALDH4_YEAST	sp|P46367|ALDH4_YEAST(60)-sp|P46367|ALDH4_YEAST(249)	9	60	249	22886	10.1308	20141;	File: "Z:\alinden\DATA\2017\06_Jun\170619[Ridhima_TOMTIM]w and wo blocking protein\RAW\TOMTIM-\R_Gomkale_Linden_TOMTIM-_A10.raw"; ID: "20141"; scans: "22886"	393.888
no	DSS	212	1212	7543.75	2.96584	0	none	Z:\alinden\DATA\2017\06_Jun\170619[Ridhima_TOMTIM]w and wo blocking protein\RAW\TOMTIM-\R_Gomkale_Linden_TOMTIM-_A10.raw;	1	Intra	17,C(Carbamidomethyl[C]);	3.53e-18	QNKTFEVINPSTEEEICHIYEGREDDVEEAVQAADR(3)-YIPQAGIPPGVINIVSGFGKIVGEAITNHPK(20):0	ALDH4_YEAST	ALDH4_YEAST	sp|P46367|ALDH4_YEAST	sp|P46367|ALDH4_YEAST	sp|P46367|ALDH4_YEAST(60)-sp|P46367|ALDH4_YEAST(249)	9	60	249	22889	17.4522	20144;	File: "Z:\alinden\DATA\2017\06_Jun\170619[Ridhima_TOMTIM]w and wo blocking protein\RAW\TOMTIM-\R_Gomkale_Linden_TOMTIM-_A10.raw"; ID: "20144"; scans: "22889"	392.945
no	DSS	213	1213	4811.4	0.97846	0	none	Z:\alinden\DATA\2017\06_Jun\170619[Ridhima_TOMTIM]w and wo blocking protein\RAW\TOMTIM-\R_Gomkale_Linden_TOMTIM-_A10.raw;	1	Intra	null	9.05e-10	VGDPFDESTFQGAQTSQMQLNKILK(22)-YVDIGKNEGATLITGGER(6):0	ALDH4_YEAST	ALDH4_YEAST	sp|P46367|ALDH4_YEAST	sp|P46367|ALDH4_YEAST	sp|P46367|ALDH4_YEAST(374)-sp|P46367|ALDH4_YEAST(383)	17	374	383	22893	9.04335	20148;	File: "Z:\alinden\DATA\2017\06_Jun\170619[Ridhima_TOMTIM]w and wo blocking protein\RAW\TOMTIM-\R_Gomkale_Linden_TOMTIM-_A10.raw"; ID: "20148"; scans: "22893"	203.279
no	DSS	214	1214	4811.4	1.96822	0	none	Z:\alinden\DATA\2017\06_Jun\170619[Ridhima_TOMTIM]w and wo blocking protein\RAW\TOMTIM-\R_Gomkale_Linden_TOMTIM-_A10.raw;	1	Intra	null	4.48e-09	VGDPFDESTFQGAQTSQMQLNKILK(22)-YVDIGKNEGATLITGGER(6):0	ALDH4_YEAST	ALDH4_YEAST	sp|P46367|ALDH4_YEAST	sp|P46367|ALDH4_YEAST	sp|P46367|ALDH4_YEAST(374)-sp|P46367|ALDH4_YEAST(383)	17	374	383	22905	8.34872	20159;	File: "Z:\alinden\DATA\2017\06_Jun\170619[Ridhima_TOMTIM]w and wo blocking protein\RAW\TOMTIM-\R_Gomkale_Linden_TOMTIM-_A10.raw"; ID: "20159"; scans: "22905"	408.822
no	DSS	215	1215	8402.09	3.95377	1	none	Z:\alinden\DATA\2017\06_Jun\170619[Ridhima_TOMTIM]w and wo blocking protein\RAW\TOMTIM-\R_Gomkale_Linden_TOMTIM-_A10.raw;	1	Intra	null	2.48e-08	LAGAEEWTQNYVALLAQNYHLSSKMSNYLVQNYGTR(24)-LAGAEEWTQNYVALLAQNYHLSSKMSNYLVQNYGTR(24):0	GPDM_YEAST	GPDM_YEAST	sp|P32191|GPDM_YEAST	sp|P32191|GPDM_YEAST	sp|P32191|GPDM_YEAST(518)-sp|P32191|GPDM_YEAST(518)	5	518	518	23047	7.60555	20292;	File: "Z:\alinden\DATA\2017\06_Jun\170619[Ridhima_TOMTIM]w and wo blocking protein\RAW\TOMTIM-\R_Gomkale_Linden_TOMTIM-_A10.raw"; ID: "20292"; scans: "23047"	470.292
no	DSS	216	1216	8402.09	2.97889	1	none	Z:\alinden\DATA\2017\06_Jun\170619[Ridhima_TOMTIM]w and wo blocking protein\RAW\TOMTIM-\R_Gomkale_Linden_TOMTIM-_A10.raw;	1	Intra	null	3.9e-11	LAGAEEWTQNYVALLAQNYHLSSKMSNYLVQNYGTR(24)-LAGAEEWTQNYVALLAQNYHLSSKMSNYLVQNYGTR(24):0	GPDM_YEAST	GPDM_YEAST	sp|P32191|GPDM_YEAST	sp|P32191|GPDM_YEAST	sp|P32191|GPDM_YEAST(518)-sp|P32191|GPDM_YEAST(518)	5	518	518	23173	10.4089	20411;	File: "Z:\alinden\DATA\2017\06_Jun\170619[Ridhima_TOMTIM]w and wo blocking protein\RAW\TOMTIM-\R_Gomkale_Linden_TOMTIM-_A10.raw"; ID: "20411"; scans: "23173"	354.373
no	DSS	217	1217	7325.69	3.95661	0	none	Z:\alinden\DATA\2017\06_Jun\170619[Ridhima_TOMTIM]w and wo blocking protein\RAW\TOMTIM-\R_Gomkale_Linden_TOMTIM-_A10.raw;	1	Intra	53,C(Carbamidomethyl[C]);	1.53e-08	LAGAEEWTQNYVALLAQNYHLSSKMSNYLVQNYGTR(24)-MVIPSIGVHIVLPSFYCPKDMGLLDVR(19):0	GPDM_YEAST	GPDM_YEAST	sp|P32191|GPDM_YEAST	sp|P32191|GPDM_YEAST	sp|P32191|GPDM_YEAST(518)-sp|P32191|GPDM_YEAST(344)	4	518	344	23213	7.81531	20449;	File: "Z:\alinden\DATA\2017\06_Jun\170619[Ridhima_TOMTIM]w and wo blocking protein\RAW\TOMTIM-\R_Gomkale_Linden_TOMTIM-_A10.raw"; ID: "20449"; scans: "23213"	539.735
no	DSS	218	1218	7325.69	3.96462	0	none	Z:\alinden\DATA\2017\06_Jun\170619[Ridhima_TOMTIM]w and wo blocking protein\RAW\TOMTIM-\R_Gomkale_Linden_TOMTIM-_A10.raw;	1	Intra	53,C(Carbamidomethyl[C]);	7.99e-13	LAGAEEWTQNYVALLAQNYHLSSKMSNYLVQNYGTR(24)-MVIPSIGVHIVLPSFYCPKDMGLLDVR(19):0	GPDM_YEAST	GPDM_YEAST	sp|P32191|GPDM_YEAST	sp|P32191|GPDM_YEAST	sp|P32191|GPDM_YEAST(518)-sp|P32191|GPDM_YEAST(344)	4	518	344	23262	12.0975	20494;	File: "Z:\alinden\DATA\2017\06_Jun\170619[Ridhima_TOMTIM]w and wo blocking protein\RAW\TOMTIM-\R_Gomkale_Linden_TOMTIM-_A10.raw"; ID: "20494"; scans: "23262"	540.827
no	DSS	219	1219	4885.72	2.98515	0	none	Z:\alinden\DATA\2017\06_Jun\170619[Ridhima_TOMTIM]w and wo blocking protein\RAW\TOMTIM-\R_Gomkale_Linden_TOMTIM-_A10.raw;	1	Inter	null	0.000143	YIPQAGIPPGVINIVSGFGKIVGEAITNHPK(20)-MPKVVETVKSLFGK(3):0	ALDH4_YEAST	HSP77_YEAST	sp|P46367|ALDH4_YEAST	sp|P0CS90|HSP77_YEAST	sp|P46367|ALDH4_YEAST(249)-sp|P0CS90|HSP77_YEAST(371)	2	249	371	23319	3.84466	20548;	File: "Z:\alinden\DATA\2017\06_Jun\170619[Ridhima_TOMTIM]w and wo blocking protein\RAW\TOMTIM-\R_Gomkale_Linden_TOMTIM-_A10.raw"; ID: "20548"; scans: "23319"	610.496
no	DSS	220	1220	5519.01	3.97697	0	none	Z:\alinden\DATA\2017\06_Jun\170619[Ridhima_TOMTIM]w and wo blocking protein\RAW\TOMTIM-\R_Gomkale_Linden_TOMTIM-_A10.raw;	1	Intra	7,C(Carbamidomethyl[C]);	4.81e-08	RQPLGVCGQIIPWNFPLLMWAWKIAPALVTGNTVVLK(23)-KVAFTGSTATGR(1):0	ALDH4_YEAST	ALDH4_YEAST	sp|P46367|ALDH4_YEAST	sp|P46367|ALDH4_YEAST	sp|P46367|ALDH4_YEAST(201)-sp|P46367|ALDH4_YEAST(263)	45	201	263	23528	7.31785	20745;	File: "Z:\alinden\DATA\2017\06_Jun\170619[Ridhima_TOMTIM]w and wo blocking protein\RAW\TOMTIM-\R_Gomkale_Linden_TOMTIM-_A10.raw"; ID: "20745"; scans: "23528"	719.944
no	DSS	221	1221	5519.01	4.02517	0	none	Z:\alinden\DATA\2017\06_Jun\170619[Ridhima_TOMTIM]w and wo blocking protein\RAW\TOMTIM-\R_Gomkale_Linden_TOMTIM-_A10.raw;	1	Intra	7,C(Carbamidomethyl[C]);	3.54e-08	RQPLGVCGQIIPWNFPLLMWAWKIAPALVTGNTVVLK(23)-KVAFTGSTATGR(1):0	ALDH4_YEAST	ALDH4_YEAST	sp|P46367|ALDH4_YEAST	sp|P46367|ALDH4_YEAST	sp|P46367|ALDH4_YEAST(201)-sp|P46367|ALDH4_YEAST(263)	45	201	263	23696	7.451	20903;	File: "Z:\alinden\DATA\2017\06_Jun\170619[Ridhima_TOMTIM]w and wo blocking protein\RAW\TOMTIM-\R_Gomkale_Linden_TOMTIM-_A10.raw"; ID: "20903"; scans: "23696"	728.663
no	DSS	222	1222	5519.01	2.99977	0	none	Z:\alinden\DATA\2017\06_Jun\170619[Ridhima_TOMTIM]w and wo blocking protein\RAW\TOMTIM-\R_Gomkale_Linden_TOMTIM-_A10.raw;	1	Intra	7,C(Carbamidomethyl[C]);	1.5e-06	RQPLGVCGQIIPWNFPLLMWAWKIAPALVTGNTVVLK(23)-KVAFTGSTATGR(1):0	ALDH4_YEAST	ALDH4_YEAST	sp|P46367|ALDH4_YEAST	sp|P46367|ALDH4_YEAST	sp|P46367|ALDH4_YEAST(201)-sp|P46367|ALDH4_YEAST(263)	45	201	263	23919	5.82391	21112;	File: "Z:\alinden\DATA\2017\06_Jun\170619[Ridhima_TOMTIM]w and wo blocking protein\RAW\TOMTIM-\R_Gomkale_Linden_TOMTIM-_A10.raw"; ID: "21112"; scans: "23919"	543.139
no	DSS	223	1223	5519.01	2.99797	0	none	Z:\alinden\DATA\2017\06_Jun\170619[Ridhima_TOMTIM]w and wo blocking protein\RAW\TOMTIM-\R_Gomkale_Linden_TOMTIM-_A10.raw;	1	Intra	7,C(Carbamidomethyl[C]);	1.18e-09	RQPLGVCGQIIPWNFPLLMWAWKIAPALVTGNTVVLK(23)-KVAFTGSTATGR(1):0	ALDH4_YEAST	ALDH4_YEAST	sp|P46367|ALDH4_YEAST	sp|P46367|ALDH4_YEAST	sp|P46367|ALDH4_YEAST(201)-sp|P46367|ALDH4_YEAST(263)	45	201	263	24176	8.92812	21353;	File: "Z:\alinden\DATA\2017\06_Jun\170619[Ridhima_TOMTIM]w and wo blocking protein\RAW\TOMTIM-\R_Gomkale_Linden_TOMTIM-_A10.raw"; ID: "21353"; scans: "24176"	542.814
no	DSS	224	1224	5519.01	0.99662	0	none	Z:\alinden\DATA\2017\06_Jun\170619[Ridhima_TOMTIM]w and wo blocking protein\RAW\TOMTIM-\R_Gomkale_Linden_TOMTIM-_A10.raw;	1	Intra	7,C(Carbamidomethyl[C]);	6.75e-11	RQPLGVCGQIIPWNFPLLMWAWKIAPALVTGNTVVLK(23)-KVAFTGSTATGR(1):0	ALDH4_YEAST	ALDH4_YEAST	sp|P46367|ALDH4_YEAST	sp|P46367|ALDH4_YEAST	sp|P46367|ALDH4_YEAST(201)-sp|P46367|ALDH4_YEAST(263)	45	201	263	24283	10.1707	21453;	File: "Z:\alinden\DATA\2017\06_Jun\170619[Ridhima_TOMTIM]w and wo blocking protein\RAW\TOMTIM-\R_Gomkale_Linden_TOMTIM-_A10.raw"; ID: "21453"; scans: "24283"	180.514
no	DSS	225	1225	5519.01	0.02797	0	none	Z:\alinden\DATA\2017\06_Jun\170619[Ridhima_TOMTIM]w and wo blocking protein\RAW\TOMTIM-\R_Gomkale_Linden_TOMTIM-_A10.raw;	1	Intra	7,C(Carbamidomethyl[C]);	2.93e-06	RQPLGVCGQIIPWNFPLLMWAWKIAPALVTGNTVVLK(23)-KVAFTGSTATGR(1):0	ALDH4_YEAST	ALDH4_YEAST	sp|P46367|ALDH4_YEAST	sp|P46367|ALDH4_YEAST	sp|P46367|ALDH4_YEAST(201)-sp|P46367|ALDH4_YEAST(263)	45	201	263	24428	5.53313	21590;	File: "Z:\alinden\DATA\2017\06_Jun\170619[Ridhima_TOMTIM]w and wo blocking protein\RAW\TOMTIM-\R_Gomkale_Linden_TOMTIM-_A10.raw"; ID: "21590"; scans: "24428"	5.06698
no	DSS	226	1226	5519.01	2.96807	0	none	Z:\alinden\DATA\2017\06_Jun\170619[Ridhima_TOMTIM]w and wo blocking protein\RAW\TOMTIM-\R_Gomkale_Linden_TOMTIM-_A10.raw;	1	Intra	7,C(Carbamidomethyl[C]);	1.15e-08	RQPLGVCGQIIPWNFPLLMWAWKIAPALVTGNTVVLK(23)-KVAFTGSTATGR(1):0	ALDH4_YEAST	ALDH4_YEAST	sp|P46367|ALDH4_YEAST	sp|P46367|ALDH4_YEAST	sp|P46367|ALDH4_YEAST(201)-sp|P46367|ALDH4_YEAST(263)	45	201	263	24564	7.9393	21718;	File: "Z:\alinden\DATA\2017\06_Jun\170619[Ridhima_TOMTIM]w and wo blocking protein\RAW\TOMTIM-\R_Gomkale_Linden_TOMTIM-_A10.raw"; ID: "21718"; scans: "24564"	537.403
no	DSS	227	1227	5519.01	2.00612	0	none	Z:\alinden\DATA\2017\06_Jun\170619[Ridhima_TOMTIM]w and wo blocking protein\RAW\TOMTIM-\R_Gomkale_Linden_TOMTIM-_A10.raw;	1	Intra	7,C(Carbamidomethyl[C]);	5.43e-05	RQPLGVCGQIIPWNFPLLMWAWKIAPALVTGNTVVLK(23)-KVAFTGSTATGR(1):0	ALDH4_YEAST	ALDH4_YEAST	sp|P46367|ALDH4_YEAST	sp|P46367|ALDH4_YEAST	sp|P46367|ALDH4_YEAST(201)-sp|P46367|ALDH4_YEAST(263)	45	201	263	24740	4.2652	21884;	File: "Z:\alinden\DATA\2017\06_Jun\170619[Ridhima_TOMTIM]w and wo blocking protein\RAW\TOMTIM-\R_Gomkale_Linden_TOMTIM-_A10.raw"; ID: "21884"; scans: "24740"	363.294
no	DSS	228	1228	5519.01	2.00737	0	none	Z:\alinden\DATA\2017\06_Jun\170619[Ridhima_TOMTIM]w and wo blocking protein\RAW\TOMTIM-\R_Gomkale_Linden_TOMTIM-_A10.raw;	1	Intra	7,C(Carbamidomethyl[C]);	2.07e-06	RQPLGVCGQIIPWNFPLLMWAWKIAPALVTGNTVVLK(23)-KVAFTGSTATGR(1):0	ALDH4_YEAST	ALDH4_YEAST	sp|P46367|ALDH4_YEAST	sp|P46367|ALDH4_YEAST	sp|P46367|ALDH4_YEAST(201)-sp|P46367|ALDH4_YEAST(263)	45	201	263	24871	5.68403	22007;	File: "Z:\alinden\DATA\2017\06_Jun\170619[Ridhima_TOMTIM]w and wo blocking protein\RAW\TOMTIM-\R_Gomkale_Linden_TOMTIM-_A10.raw"; ID: "22007"; scans: "24871"	363.52
no	DSS	229	1229	5519.01	3.02482	0	none	Z:\alinden\DATA\2017\06_Jun\170619[Ridhima_TOMTIM]w and wo blocking protein\RAW\TOMTIM-\R_Gomkale_Linden_TOMTIM-_A10.raw;	1	Intra	7,C(Carbamidomethyl[C]);	1.43e-06	RQPLGVCGQIIPWNFPLLMWAWKIAPALVTGNTVVLK(23)-KVAFTGSTATGR(1):0	ALDH4_YEAST	ALDH4_YEAST	sp|P46367|ALDH4_YEAST	sp|P46367|ALDH4_YEAST	sp|P46367|ALDH4_YEAST(201)-sp|P46367|ALDH4_YEAST(263)	45	201	263	25119	5.84466	22240;	File: "Z:\alinden\DATA\2017\06_Jun\170619[Ridhima_TOMTIM]w and wo blocking protein\RAW\TOMTIM-\R_Gomkale_Linden_TOMTIM-_A10.raw"; ID: "22240"; scans: "25119"	547.672
no	DSS	230	1230	3027.53	1.00473	0	none	Z:\alinden\DATA\2017\06_Jun\170619[Ridhima_TOMTIM]w and wo blocking protein\RAW\TOMTIM-\R_Gomkale_Linden_TOMTIM-_A10.raw;	1	Intra	null	5.39e-09	YAGEVSHDDKHIIVDGK(10)-KIATYQER(1):0	G3P3_YEAST	G3P3_YEAST	sp|P00359|G3P3_YEAST	sp|P00359|G3P3_YEAST	sp|P00359|G3P3_YEAST(63)-sp|P00359|G3P3_YEAST(71)	11	63	71	3832	8.26841	2228;	File: "Z:\alinden\DATA\2017\06_Jun\170619[Ridhima_TOMTIM]w and wo blocking protein\RAW\TOMTIM-\R_Gomkale_Linden_TOMTIM-_A10.raw"; ID: "2228"; scans: "3832"	331.644
no	DSS	231	1231	5519.01	4.01787	0	none	Z:\alinden\DATA\2017\06_Jun\170619[Ridhima_TOMTIM]w and wo blocking protein\RAW\TOMTIM-\R_Gomkale_Linden_TOMTIM-_A10.raw;	1	Intra	7,C(Carbamidomethyl[C]);	6.22e-11	RQPLGVCGQIIPWNFPLLMWAWKIAPALVTGNTVVLK(23)-KVAFTGSTATGR(1):0	ALDH4_YEAST	ALDH4_YEAST	sp|P46367|ALDH4_YEAST	sp|P46367|ALDH4_YEAST	sp|P46367|ALDH4_YEAST(201)-sp|P46367|ALDH4_YEAST(263)	45	201	263	25249	10.2062	22362;	File: "Z:\alinden\DATA\2017\06_Jun\170619[Ridhima_TOMTIM]w and wo blocking protein\RAW\TOMTIM-\R_Gomkale_Linden_TOMTIM-_A10.raw"; ID: "22362"; scans: "25249"	727.343
no	DSS	232	1232	3027.53	3.00826	0	none	Z:\alinden\DATA\2017\06_Jun\170619[Ridhima_TOMTIM]w and wo blocking protein\RAW\TOMTIM-\R_Gomkale_Linden_TOMTIM-_A10.raw;	1	Intra	null	5.84e-16	YAGEVSHDDKHIIVDGK(10)-KIATYQER(1):0	G3P3_YEAST	G3P3_YEAST	sp|P00359|G3P3_YEAST	sp|P00359|G3P3_YEAST	sp|P00359|G3P3_YEAST(63)-sp|P00359|G3P3_YEAST(71)	11	63	71	3845	15.2336	2241;	File: "Z:\alinden\DATA\2017\06_Jun\170619[Ridhima_TOMTIM]w and wo blocking protein\RAW\TOMTIM-\R_Gomkale_Linden_TOMTIM-_A10.raw"; ID: "2241"; scans: "3845"	992.319
no	DSS	233	1233	3027.53	0.00318	0	none	Z:\alinden\DATA\2017\06_Jun\170619[Ridhima_TOMTIM]w and wo blocking protein\RAW\TOMTIM-\R_Gomkale_Linden_TOMTIM-_A10.raw;	1	Intra	null	3.09e-11	YAGEVSHDDKHIIVDGK(10)-KIATYQER(1):0	G3P3_YEAST	G3P3_YEAST	sp|P00359|G3P3_YEAST	sp|P00359|G3P3_YEAST	sp|P00359|G3P3_YEAST(63)-sp|P00359|G3P3_YEAST(71)	11	63	71	3847	10.51	2242;	File: "Z:\alinden\DATA\2017\06_Jun\170619[Ridhima_TOMTIM]w and wo blocking protein\RAW\TOMTIM-\R_Gomkale_Linden_TOMTIM-_A10.raw"; ID: "2242"; scans: "3847"	1.05001
no	DSS	234	1234	5519.01	2.00067	0	none	Z:\alinden\DATA\2017\06_Jun\170619[Ridhima_TOMTIM]w and wo blocking protein\RAW\TOMTIM-\R_Gomkale_Linden_TOMTIM-_A10.raw;	1	Intra	7,C(Carbamidomethyl[C]);	6.7e-07	RQPLGVCGQIIPWNFPLLMWAWKIAPALVTGNTVVLK(23)-KVAFTGSTATGR(1):0	ALDH4_YEAST	ALDH4_YEAST	sp|P46367|ALDH4_YEAST	sp|P46367|ALDH4_YEAST	sp|P46367|ALDH4_YEAST(201)-sp|P46367|ALDH4_YEAST(263)	45	201	263	25321	6.17393	22430;	File: "Z:\alinden\DATA\2017\06_Jun\170619[Ridhima_TOMTIM]w and wo blocking protein\RAW\TOMTIM-\R_Gomkale_Linden_TOMTIM-_A10.raw"; ID: "22430"; scans: "25321"	362.308
no	DSS	235	1235	5519.01	0.99172	0	none	Z:\alinden\DATA\2017\06_Jun\170619[Ridhima_TOMTIM]w and wo blocking protein\RAW\TOMTIM-\R_Gomkale_Linden_TOMTIM-_A10.raw;	1	Intra	7,C(Carbamidomethyl[C]);	8.2e-09	RQPLGVCGQIIPWNFPLLMWAWKIAPALVTGNTVVLK(23)-KVAFTGSTATGR(1):0	ALDH4_YEAST	ALDH4_YEAST	sp|P46367|ALDH4_YEAST	sp|P46367|ALDH4_YEAST	sp|P46367|ALDH4_YEAST(201)-sp|P46367|ALDH4_YEAST(263)	45	201	263	25503	8.08619	22600;	File: "Z:\alinden\DATA\2017\06_Jun\170619[Ridhima_TOMTIM]w and wo blocking protein\RAW\TOMTIM-\R_Gomkale_Linden_TOMTIM-_A10.raw"; ID: "22600"; scans: "25503"	179.626
no	DSS	236	1236	4793.62	3.00212	0	none	Z:\alinden\DATA\2017\06_Jun\170619[Ridhima_TOMTIM]w and wo blocking protein\RAW\TOMTIM-\R_Gomkale_Linden_TOMTIM-_A10.raw;	1	Intra	null	0.001	YIPQAGIPPGVINIVSGFGKIVGEAITNHPK(20)-GYFIKPTVFGDVK(5):0	ALDH4_YEAST	ALDH4_YEAST	sp|P46367|ALDH4_YEAST	sp|P46367|ALDH4_YEAST	sp|P46367|ALDH4_YEAST(249)-sp|P46367|ALDH4_YEAST(404)	1	249	404	25624	3	22714;	File: "Z:\alinden\DATA\2017\06_Jun\170619[Ridhima_TOMTIM]w and wo blocking protein\RAW\TOMTIM-\R_Gomkale_Linden_TOMTIM-_A10.raw"; ID: "22714"; scans: "25624"	625.751
no	DSS	237	1237	5519.01	4.01112	0	none	Z:\alinden\DATA\2017\06_Jun\170619[Ridhima_TOMTIM]w and wo blocking protein\RAW\TOMTIM-\R_Gomkale_Linden_TOMTIM-_A10.raw;	1	Intra	7,C(Carbamidomethyl[C]);	3.14e-07	RQPLGVCGQIIPWNFPLLMWAWKIAPALVTGNTVVLK(23)-KVAFTGSTATGR(1):0	ALDH4_YEAST	ALDH4_YEAST	sp|P46367|ALDH4_YEAST	sp|P46367|ALDH4_YEAST	sp|P46367|ALDH4_YEAST(201)-sp|P46367|ALDH4_YEAST(263)	45	201	263	25724	6.50307	22808;	File: "Z:\alinden\DATA\2017\06_Jun\170619[Ridhima_TOMTIM]w and wo blocking protein\RAW\TOMTIM-\R_Gomkale_Linden_TOMTIM-_A10.raw"; ID: "22808"; scans: "25724"	726.122
no	DSS	238	1238	3027.53	0.00018	0	none	Z:\alinden\DATA\2017\06_Jun\170619[Ridhima_TOMTIM]w and wo blocking protein\RAW\TOMTIM-\R_Gomkale_Linden_TOMTIM-_A10.raw;	1	Intra	null	4.3e-09	YAGEVSHDDKHIIVDGK(10)-KIATYQER(1):0	G3P3_YEAST	G3P3_YEAST	sp|P00359|G3P3_YEAST	sp|P00359|G3P3_YEAST	sp|P00359|G3P3_YEAST(63)-sp|P00359|G3P3_YEAST(71)	11	63	71	3901	8.36653	2293;	File: "Z:\alinden\DATA\2017\06_Jun\170619[Ridhima_TOMTIM]w and wo blocking protein\RAW\TOMTIM-\R_Gomkale_Linden_TOMTIM-_A10.raw"; ID: "2293"; scans: "3901"	0.059435
no	DSS	239	1239	5519.01	1.00942	0	none	Z:\alinden\DATA\2017\06_Jun\170619[Ridhima_TOMTIM]w and wo blocking protein\RAW\TOMTIM-\R_Gomkale_Linden_TOMTIM-_A10.raw;	1	Intra	7,C(Carbamidomethyl[C]);	2.85e-05	RQPLGVCGQIIPWNFPLLMWAWKIAPALVTGNTVVLK(23)-KVAFTGSTATGR(1):0	ALDH4_YEAST	ALDH4_YEAST	sp|P46367|ALDH4_YEAST	sp|P46367|ALDH4_YEAST	sp|P46367|ALDH4_YEAST(201)-sp|P46367|ALDH4_YEAST(263)	45	201	263	25911	4.54516	22984;	File: "Z:\alinden\DATA\2017\06_Jun\170619[Ridhima_TOMTIM]w and wo blocking protein\RAW\TOMTIM-\R_Gomkale_Linden_TOMTIM-_A10.raw"; ID: "22984"; scans: "25911"	182.832
no	DSS	240	1240	5519.01	3.00527	0	none	Z:\alinden\DATA\2017\06_Jun\170619[Ridhima_TOMTIM]w and wo blocking protein\RAW\TOMTIM-\R_Gomkale_Linden_TOMTIM-_A10.raw;	1	Intra	7,C(Carbamidomethyl[C]);	8.9e-08	RQPLGVCGQIIPWNFPLLMWAWKIAPALVTGNTVVLK(23)-KVAFTGSTATGR(1):0	ALDH4_YEAST	ALDH4_YEAST	sp|P46367|ALDH4_YEAST	sp|P46367|ALDH4_YEAST	sp|P46367|ALDH4_YEAST(201)-sp|P46367|ALDH4_YEAST(263)	45	201	263	25928	7.05061	23000;	File: "Z:\alinden\DATA\2017\06_Jun\170619[Ridhima_TOMTIM]w and wo blocking protein\RAW\TOMTIM-\R_Gomkale_Linden_TOMTIM-_A10.raw"; ID: "23000"; scans: "25928"	544.135
no	DSS	241	1241	5519.01	2.00187	0	none	Z:\alinden\DATA\2017\06_Jun\170619[Ridhima_TOMTIM]w and wo blocking protein\RAW\TOMTIM-\R_Gomkale_Linden_TOMTIM-_A10.raw;	1	Intra	7,C(Carbamidomethyl[C]);	4.38e-07	RQPLGVCGQIIPWNFPLLMWAWKIAPALVTGNTVVLK(23)-KVAFTGSTATGR(1):0	ALDH4_YEAST	ALDH4_YEAST	sp|P46367|ALDH4_YEAST	sp|P46367|ALDH4_YEAST	sp|P46367|ALDH4_YEAST(201)-sp|P46367|ALDH4_YEAST(263)	45	201	263	25960	6.35853	23030;	File: "Z:\alinden\DATA\2017\06_Jun\170619[Ridhima_TOMTIM]w and wo blocking protein\RAW\TOMTIM-\R_Gomkale_Linden_TOMTIM-_A10.raw"; ID: "23030"; scans: "25960"	362.525
no	DSS	242	1242	5519.01	4.01967	0	none	Z:\alinden\DATA\2017\06_Jun\170619[Ridhima_TOMTIM]w and wo blocking protein\RAW\TOMTIM-\R_Gomkale_Linden_TOMTIM-_A10.raw;	1	Intra	7,C(Carbamidomethyl[C]);	1.8e-05	RQPLGVCGQIIPWNFPLLMWAWKIAPALVTGNTVVLK(23)-KVAFTGSTATGR(1):0	ALDH4_YEAST	ALDH4_YEAST	sp|P46367|ALDH4_YEAST	sp|P46367|ALDH4_YEAST	sp|P46367|ALDH4_YEAST(201)-sp|P46367|ALDH4_YEAST(263)	45	201	263	26416	4.74473	23454;	File: "Z:\alinden\DATA\2017\06_Jun\170619[Ridhima_TOMTIM]w and wo blocking protein\RAW\TOMTIM-\R_Gomkale_Linden_TOMTIM-_A10.raw"; ID: "23454"; scans: "26416"	727.668
no	DSS	243	1243	5519.01	4.00807	0	none	Z:\alinden\DATA\2017\06_Jun\170619[Ridhima_TOMTIM]w and wo blocking protein\RAW\TOMTIM-\R_Gomkale_Linden_TOMTIM-_A10.raw;	1	Intra	7,C(Carbamidomethyl[C]);	4.62e-07	RQPLGVCGQIIPWNFPLLMWAWKIAPALVTGNTVVLK(23)-KVAFTGSTATGR(1):0	ALDH4_YEAST	ALDH4_YEAST	sp|P46367|ALDH4_YEAST	sp|P46367|ALDH4_YEAST	sp|P46367|ALDH4_YEAST(201)-sp|P46367|ALDH4_YEAST(263)	45	201	263	26818	6.33536	23831;	File: "Z:\alinden\DATA\2017\06_Jun\170619[Ridhima_TOMTIM]w and wo blocking protein\RAW\TOMTIM-\R_Gomkale_Linden_TOMTIM-_A10.raw"; ID: "23831"; scans: "26818"	725.57
no	DSS	244	1244	2768.56	0.00221	0	none	Z:\alinden\DATA\2017\06_Jun\170619[Ridhima_TOMTIM]w and wo blocking protein\RAW\TOMTIM-\R_Gomkale_Linden_TOMTIM-_A10.raw;	1	Intra	null	1.61e-05	YYLIKPKLHPVSNSK(7)-KLDKEGR(1):0	TIM21_YEAST	TIM21_YEAST	sp|P53220|TIM21_YEAST	sp|P53220|TIM21_YEAST	sp|P53220|TIM21_YEAST(219)-sp|P53220|TIM21_YEAST(161)	5	219	161	4026	4.79317	2410;	File: "Z:\alinden\DATA\2017\06_Jun\170619[Ridhima_TOMTIM]w and wo blocking protein\RAW\TOMTIM-\R_Gomkale_Linden_TOMTIM-_A10.raw"; ID: "2410"; scans: "4026"	0.797958
no	DSS	245	1245	2768.56	-0.0002	0	none	Z:\alinden\DATA\2017\06_Jun\170619[Ridhima_TOMTIM]w and wo blocking protein\RAW\TOMTIM-\R_Gomkale_Linden_TOMTIM-_A10.raw;	1	Intra	null	0.000762	YYLIKPKLHPVSNSK(7)-KLDKEGR(4):0	TIM21_YEAST	TIM21_YEAST	sp|P53220|TIM21_YEAST	sp|P53220|TIM21_YEAST	sp|P53220|TIM21_YEAST(219)-sp|P53220|TIM21_YEAST(164)	6	219	164	4400	3.11805	2761;	File: "Z:\alinden\DATA\2017\06_Jun\170619[Ridhima_TOMTIM]w and wo blocking protein\RAW\TOMTIM-\R_Gomkale_Linden_TOMTIM-_A10.raw"; ID: "2761"; scans: "4400"	-0.072213
no	DSS	246	1246	3748.87	2.00775	0	none	Z:\alinden\DATA\2017\06_Jun\170619[Ridhima_TOMTIM]w and wo blocking protein\RAW\TOMTIM-\R_Gomkale_Linden_TOMTIM-_A10.raw;	1	Intra	null	2.67e-07	ALLNNSHLFHQMHTEAQKR(18)-AKTNQDTEGFVK(2):0	DLDH_YEAST	DLDH_YEAST	sp|P09624|DLDH_YEAST	sp|P09624|DLDH_YEAST	sp|P09624|DLDH_YEAST(92)-sp|P09624|DLDH_YEAST(421)	1	92	421	4745	6.57349	3085;	File: "Z:\alinden\DATA\2017\06_Jun\170619[Ridhima_TOMTIM]w and wo blocking protein\RAW\TOMTIM-\R_Gomkale_Linden_TOMTIM-_A10.raw"; ID: "3085"; scans: "4745"	535.13
no	DSS	247	1247	3951.98	1.00097	0	none	Z:\alinden\DATA\2017\06_Jun\170619[Ridhima_TOMTIM]w and wo blocking protein\RAW\TOMTIM-\R_Gomkale_Linden_TOMTIM-_A10.raw;	1	Intra	null	2.46e-11	ENTFQKPYSDEEVTKTPVGSR(15)-KIFEAPHPHATR(1):0	MAOM_YEAST	MAOM_YEAST	sp|P36013|MAOM_YEAST	sp|P36013|MAOM_YEAST	sp|P36013|MAOM_YEAST(67)-sp|P36013|MAOM_YEAST(76)	3	67	76	4836	10.6091	3171;	File: "Z:\alinden\DATA\2017\06_Jun\170619[Ridhima_TOMTIM]w and wo blocking protein\RAW\TOMTIM-\R_Gomkale_Linden_TOMTIM-_A10.raw"; ID: "3171"; scans: "4836"	253.155
no	DSS	249	1249	3951.98	-0.00923	0	none	Z:\alinden\DATA\2017\06_Jun\170619[Ridhima_TOMTIM]w and wo blocking protein\RAW\TOMTIM-\R_Gomkale_Linden_TOMTIM-_A10.raw;	1	Intra	null	1.03e-06	ENTFQKPYSDEEVTKTPVGSR(15)-KIFEAPHPHATR(1):0	MAOM_YEAST	MAOM_YEAST	sp|P36013|MAOM_YEAST	sp|P36013|MAOM_YEAST	sp|P36013|MAOM_YEAST(67)-sp|P36013|MAOM_YEAST(76)	3	67	76	4847	5.98716	3182;	File: "Z:\alinden\DATA\2017\06_Jun\170619[Ridhima_TOMTIM]w and wo blocking protein\RAW\TOMTIM-\R_Gomkale_Linden_TOMTIM-_A10.raw"; ID: "3182"; scans: "4847"	-2.33495
no	DSS	251	1251	4932.36	1.00334	0	none	Z:\alinden\DATA\2017\06_Jun\170619[Ridhima_TOMTIM]w and wo blocking protein\RAW\TOMTIM-\R_Gomkale_Linden_TOMTIM-_A10.raw;	1	Inter	null	0.00252	PENYSDAKSDLDAHSDTYFNTHHPSPEQRPR(8)-KINKELFHR(4):0	DLD1_YEAST	RT17_YEAST	sp|P32891|DLD1_YEAST	sp|Q03246|RT17_YEAST	sp|P32891|DLD1_YEAST(129)-sp|Q03246|RT17_YEAST(35)	2	129	35	5028	2.5986	3352;	File: "Z:\alinden\DATA\2017\06_Jun\170619[Ridhima_TOMTIM]w and wo blocking protein\RAW\TOMTIM-\R_Gomkale_Linden_TOMTIM-_A10.raw"; ID: "3352"; scans: "5028"	203.337
no	DSS	252	1252	3247.7	0.00106	0	none	Z:\alinden\DATA\2017\06_Jun\170619[Ridhima_TOMTIM]w and wo blocking protein\RAW\TOMTIM-\R_Gomkale_Linden_TOMTIM-_A10.raw;	1	Intra	null	2.35e-06	VISESQNNDKTFAK(10)-LALNSVGGKSSASIAR(9):0	ETR1_YEAST	ETR1_YEAST	sp|P38071|ETR1_YEAST	sp|P38071|ETR1_YEAST	sp|P38071|ETR1_YEAST(238)-sp|P38071|ETR1_YEAST(265)	21	238	265	5766	5.62893	4044;	File: "Z:\alinden\DATA\2017\06_Jun\170619[Ridhima_TOMTIM]w and wo blocking protein\RAW\TOMTIM-\R_Gomkale_Linden_TOMTIM-_A10.raw"; ID: "4044"; scans: "5766"	0.326283
no	DSS	253	1253	3247.7	0.00197	0	none	Z:\alinden\DATA\2017\06_Jun\170619[Ridhima_TOMTIM]w and wo blocking protein\RAW\TOMTIM-\R_Gomkale_Linden_TOMTIM-_A10.raw;	1	Intra	null	4.62e-10	VISESQNNDKTFAK(10)-LALNSVGGKSSASIAR(9):0	ETR1_YEAST	ETR1_YEAST	sp|P38071|ETR1_YEAST	sp|P38071|ETR1_YEAST	sp|P38071|ETR1_YEAST(238)-sp|P38071|ETR1_YEAST(265)	21	238	265	5785	9.33536	4061;	File: "Z:\alinden\DATA\2017\06_Jun\170619[Ridhima_TOMTIM]w and wo blocking protein\RAW\TOMTIM-\R_Gomkale_Linden_TOMTIM-_A10.raw"; ID: "4061"; scans: "5785"	0.606394
no	DSS	254	1254	3247.7	0.01494	0	none	Z:\alinden\DATA\2017\06_Jun\170619[Ridhima_TOMTIM]w and wo blocking protein\RAW\TOMTIM-\R_Gomkale_Linden_TOMTIM-_A10.raw;	1	Intra	null	4.32e-05	VISESQNNDKTFAK(10)-LALNSVGGKSSASIAR(9):0	ETR1_YEAST	ETR1_YEAST	sp|P38071|ETR1_YEAST	sp|P38071|ETR1_YEAST	sp|P38071|ETR1_YEAST(238)-sp|P38071|ETR1_YEAST(265)	21	238	265	5875	4.36452	4146;	File: "Z:\alinden\DATA\2017\06_Jun\170619[Ridhima_TOMTIM]w and wo blocking protein\RAW\TOMTIM-\R_Gomkale_Linden_TOMTIM-_A10.raw"; ID: "4146"; scans: "5875"	4.59872
no	DSS	255	1255	3887.89	0.01898	0	none	Z:\alinden\DATA\2017\06_Jun\170619[Ridhima_TOMTIM]w and wo blocking protein\RAW\TOMTIM-\R_Gomkale_Linden_TOMTIM-_A10.raw;	1	Intra	null	1.06e-15	ARDFNELSDKLDQQER(10)-LLKNNTGDANTEEAAAR(3):0	OM45_YEAST	OM45_YEAST	sp|P16547|OM45_YEAST	sp|P16547|OM45_YEAST	sp|P16547|OM45_YEAST(188)-sp|P16547|OM45_YEAST(204)	3	188	204	6474	14.9747	4708;	File: "Z:\alinden\DATA\2017\06_Jun\170619[Ridhima_TOMTIM]w and wo blocking protein\RAW\TOMTIM-\R_Gomkale_Linden_TOMTIM-_A10.raw"; ID: "4708"; scans: "6474"	4.88054
no	DSS	256	1256	2684.48	0.00136	0	none	Z:\alinden\DATA\2017\06_Jun\170619[Ridhima_TOMTIM]w and wo blocking protein\RAW\TOMTIM-\R_Gomkale_Linden_TOMTIM-_A10.raw;	1	Inter	null	0.00126	AYTSHLSSKTGLHFGR(9)-SALKLVR(4):0	QCR10_YEAST	QCR2_YEAST	sp|P37299|QCR10_YEAST	sp|P07257|QCR2_YEAST	sp|P37299|QCR10_YEAST(10)-sp|P07257|QCR2_YEAST(66)	1	10	66	6514	2.89963	4745;	File: "Z:\alinden\DATA\2017\06_Jun\170619[Ridhima_TOMTIM]w and wo blocking protein\RAW\TOMTIM-\R_Gomkale_Linden_TOMTIM-_A10.raw"; ID: "4745"; scans: "6514"	0.506426
no	DSS	257	1257	3328.75	0.00034	0	none	Z:\alinden\DATA\2017\06_Jun\170619[Ridhima_TOMTIM]w and wo blocking protein\RAW\TOMTIM-\R_Gomkale_Linden_TOMTIM-_A10.raw;	1	Inter	null	1.02e-08	QTDHKEGVYEAVESLKR(5)-GPLATPIGKGHR(9):0	IDH1_YEAST	IDH2_YEAST	sp|P28834|IDH1_YEAST	sp|P28241|IDH2_YEAST	sp|P28834|IDH1_YEAST(71)-sp|P28241|IDH2_YEAST(109)	48	71	109	6718	7.9914	4936;	File: "Z:\alinden\DATA\2017\06_Jun\170619[Ridhima_TOMTIM]w and wo blocking protein\RAW\TOMTIM-\R_Gomkale_Linden_TOMTIM-_A10.raw"; ID: "4936"; scans: "6718"	0.102109
no	DSS	258	1258	3328.75	0.00217	0	none	Z:\alinden\DATA\2017\06_Jun\170619[Ridhima_TOMTIM]w and wo blocking protein\RAW\TOMTIM-\R_Gomkale_Linden_TOMTIM-_A10.raw;	1	Inter	null	1.33e-08	QTDHKEGVYEAVESLKR(5)-GPLATPIGKGHR(9):0	IDH1_YEAST	IDH2_YEAST	sp|P28834|IDH1_YEAST	sp|P28241|IDH2_YEAST	sp|P28834|IDH1_YEAST(71)-sp|P28241|IDH2_YEAST(109)	48	71	109	6725	7.87615	4942;	File: "Z:\alinden\DATA\2017\06_Jun\170619[Ridhima_TOMTIM]w and wo blocking protein\RAW\TOMTIM-\R_Gomkale_Linden_TOMTIM-_A10.raw"; ID: "4942"; scans: "6725"	0.651698
no	DSS	259	1259	3328.75	0.01197	0	none	Z:\alinden\DATA\2017\06_Jun\170619[Ridhima_TOMTIM]w and wo blocking protein\RAW\TOMTIM-\R_Gomkale_Linden_TOMTIM-_A10.raw;	1	Inter	null	8.81e-11	QTDHKEGVYEAVESLKR(5)-GPLATPIGKGHR(9):0	IDH1_YEAST	IDH2_YEAST	sp|P28834|IDH1_YEAST	sp|P28241|IDH2_YEAST	sp|P28834|IDH1_YEAST(71)-sp|P28241|IDH2_YEAST(109)	48	71	109	6741	10.055	4957;	File: "Z:\alinden\DATA\2017\06_Jun\170619[Ridhima_TOMTIM]w and wo blocking protein\RAW\TOMTIM-\R_Gomkale_Linden_TOMTIM-_A10.raw"; ID: "4957"; scans: "6741"	3.59484
no	DSS	260	1260	3328.75	0.00064	0	none	Z:\alinden\DATA\2017\06_Jun\170619[Ridhima_TOMTIM]w and wo blocking protein\RAW\TOMTIM-\R_Gomkale_Linden_TOMTIM-_A10.raw;	1	Inter	null	1.34e-07	QTDHKEGVYEAVESLKR(5)-GPLATPIGKGHR(9):0	IDH1_YEAST	IDH2_YEAST	sp|P28834|IDH1_YEAST	sp|P28241|IDH2_YEAST	sp|P28834|IDH1_YEAST(71)-sp|P28241|IDH2_YEAST(109)	48	71	109	6750	6.8729	4966;	File: "Z:\alinden\DATA\2017\06_Jun\170619[Ridhima_TOMTIM]w and wo blocking protein\RAW\TOMTIM-\R_Gomkale_Linden_TOMTIM-_A10.raw"; ID: "4966"; scans: "6750"	0.192206
no	DSS	261	1261	3328.75	0.00678	0	none	Z:\alinden\DATA\2017\06_Jun\170619[Ridhima_TOMTIM]w and wo blocking protein\RAW\TOMTIM-\R_Gomkale_Linden_TOMTIM-_A10.raw;	1	Inter	null	1.64e-06	QTDHKEGVYEAVESLKR(5)-GPLATPIGKGHR(9):0	IDH1_YEAST	IDH2_YEAST	sp|P28834|IDH1_YEAST	sp|P28241|IDH2_YEAST	sp|P28834|IDH1_YEAST(71)-sp|P28241|IDH2_YEAST(109)	48	71	109	6771	5.78516	4986;	File: "Z:\alinden\DATA\2017\06_Jun\170619[Ridhima_TOMTIM]w and wo blocking protein\RAW\TOMTIM-\R_Gomkale_Linden_TOMTIM-_A10.raw"; ID: "4986"; scans: "6771"	2.03618
no	DSS	262	1262	3328.75	0.00187	0	none	Z:\alinden\DATA\2017\06_Jun\170619[Ridhima_TOMTIM]w and wo blocking protein\RAW\TOMTIM-\R_Gomkale_Linden_TOMTIM-_A10.raw;	1	Inter	null	1.31e-08	QTDHKEGVYEAVESLKR(5)-GPLATPIGKGHR(9):0	IDH1_YEAST	IDH2_YEAST	sp|P28834|IDH1_YEAST	sp|P28241|IDH2_YEAST	sp|P28834|IDH1_YEAST(71)-sp|P28241|IDH2_YEAST(109)	48	71	109	6816	7.88273	5027;	File: "Z:\alinden\DATA\2017\06_Jun\170619[Ridhima_TOMTIM]w and wo blocking protein\RAW\TOMTIM-\R_Gomkale_Linden_TOMTIM-_A10.raw"; ID: "5027"; scans: "6816"	0.561602
no	DSS	263	1263	3328.75	-0.00038	0	none	Z:\alinden\DATA\2017\06_Jun\170619[Ridhima_TOMTIM]w and wo blocking protein\RAW\TOMTIM-\R_Gomkale_Linden_TOMTIM-_A10.raw;	1	Inter	null	2.03e-07	QTDHKEGVYEAVESLKR(5)-GPLATPIGKGHR(9):0	IDH1_YEAST	IDH2_YEAST	sp|P28834|IDH1_YEAST	sp|P28241|IDH2_YEAST	sp|P28834|IDH1_YEAST(71)-sp|P28241|IDH2_YEAST(109)	48	71	109	6829	6.6925	5040;	File: "Z:\alinden\DATA\2017\06_Jun\170619[Ridhima_TOMTIM]w and wo blocking protein\RAW\TOMTIM-\R_Gomkale_Linden_TOMTIM-_A10.raw"; ID: "5040"; scans: "6829"	-0.114122
no	DSS	264	1264	3328.75	-0.00171	0	none	Z:\alinden\DATA\2017\06_Jun\170619[Ridhima_TOMTIM]w and wo blocking protein\RAW\TOMTIM-\R_Gomkale_Linden_TOMTIM-_A10.raw;	1	Inter	null	8.49e-06	QTDHKEGVYEAVESLKR(5)-GPLATPIGKGHR(9):0	IDH1_YEAST	IDH2_YEAST	sp|P28834|IDH1_YEAST	sp|P28241|IDH2_YEAST	sp|P28834|IDH1_YEAST(71)-sp|P28241|IDH2_YEAST(109)	48	71	109	6835	5.07109	5045;	File: "Z:\alinden\DATA\2017\06_Jun\170619[Ridhima_TOMTIM]w and wo blocking protein\RAW\TOMTIM-\R_Gomkale_Linden_TOMTIM-_A10.raw"; ID: "5045"; scans: "6835"	-0.513551
no	DSS	265	1265	2800.56	1.00251	0	none	Z:\alinden\DATA\2017\06_Jun\170619[Ridhima_TOMTIM]w and wo blocking protein\RAW\TOMTIM-\R_Gomkale_Linden_TOMTIM-_A10.raw;	1	Intra	null	1.72e-13	GGPHKVGPNLHGIFGR(5)-KGATLFKTR(7):0	CYC1_YEAST	CYC1_YEAST	sp|P00044|CYC1_YEAST	sp|P00044|CYC1_YEAST	sp|P00044|CYC1_YEAST(33)-sp|P00044|CYC1_YEAST(17)	12	33	17	6846	12.7645	5056;	File: "Z:\alinden\DATA\2017\06_Jun\170619[Ridhima_TOMTIM]w and wo blocking protein\RAW\TOMTIM-\R_Gomkale_Linden_TOMTIM-_A10.raw"; ID: "5056"; scans: "6846"	357.711
no	DSS	266	1266	3667.86	2.00979	0	none	Z:\alinden\DATA\2017\06_Jun\170619[Ridhima_TOMTIM]w and wo blocking protein\RAW\TOMTIM-\R_Gomkale_Linden_TOMTIM-_A10.raw;	1	Intra	22,C(Carbamidomethyl[C]);	8.31e-12	KLEDLSPSTHNMEVPVVK(1)-SRPCKIVDMSTSK(5):0	IF5A1_YEAST	IF5A1_YEAST	sp|P23301|IF5A1_YEAST	sp|P23301|IF5A1_YEAST	sp|P23301|IF5A1_YEAST(69)-sp|P23301|IF5A1_YEAST(40)	2	69	40	6862	11.0804	5071;	File: "Z:\alinden\DATA\2017\06_Jun\170619[Ridhima_TOMTIM]w and wo blocking protein\RAW\TOMTIM-\R_Gomkale_Linden_TOMTIM-_A10.raw"; ID: "5071"; scans: "6862"	547.496
no	DSS	267	1267	3315.75	0.00181	0	none	Z:\alinden\DATA\2017\06_Jun\170619[Ridhima_TOMTIM]w and wo blocking protein\RAW\TOMTIM-\R_Gomkale_Linden_TOMTIM-_A10.raw;	1	Intra	null	2.25e-11	YVDIGKNEGATLITGGER(6)-HIYQSAAAGLKK(11):0	ALDH4_YEAST	ALDH4_YEAST	sp|P46367|ALDH4_YEAST	sp|P46367|ALDH4_YEAST	sp|P46367|ALDH4_YEAST(383)-sp|P46367|ALDH4_YEAST(285)	4	383	285	7099	10.6478	5293;	File: "Z:\alinden\DATA\2017\06_Jun\170619[Ridhima_TOMTIM]w and wo blocking protein\RAW\TOMTIM-\R_Gomkale_Linden_TOMTIM-_A10.raw"; ID: "5293"; scans: "7099"	0.545714
no	DSS	268	1268	3187.64	0.00336	0	none	Z:\alinden\DATA\2017\06_Jun\170619[Ridhima_TOMTIM]w and wo blocking protein\RAW\TOMTIM-\R_Gomkale_Linden_TOMTIM-_A10.raw;	1	Intra	null	4.18e-14	LLKNNTGDANTEEAAAR(3)-KAIAIGEFDTAK(1):0	OM45_YEAST	OM45_YEAST	sp|P16547|OM45_YEAST	sp|P16547|OM45_YEAST	sp|P16547|OM45_YEAST(204)-sp|P16547|OM45_YEAST(129)	8	204	129	7106	13.3788	5300;	File: "Z:\alinden\DATA\2017\06_Jun\170619[Ridhima_TOMTIM]w and wo blocking protein\RAW\TOMTIM-\R_Gomkale_Linden_TOMTIM-_A10.raw"; ID: "5300"; scans: "7106"	1.05374
no	DSS	269	1269	3754.91	2.00588	0	none	Z:\alinden\DATA\2017\06_Jun\170619[Ridhima_TOMTIM]w and wo blocking protein\RAW\TOMTIM-\R_Gomkale_Linden_TOMTIM-_A10.raw;	1	Intra	null	2.11e-07	DKDGNEFMLKPPHGDGLPQR(10)-SASIVKDAAAHGLK(6):0	ACON_YEAST	ACON_YEAST	sp|P19414|ACON_YEAST	sp|P19414|ACON_YEAST	sp|P19414|ACON_YEAST(522)-sp|P19414|ACON_YEAST(398)	3	522	398	7210	6.67572	5398;	File: "Z:\alinden\DATA\2017\06_Jun\170619[Ridhima_TOMTIM]w and wo blocking protein\RAW\TOMTIM-\R_Gomkale_Linden_TOMTIM-_A10.raw"; ID: "5398"; scans: "7210"	533.774
no	DSS	270	1270	3260.85	0.00148	0	none	Z:\alinden\DATA\2017\06_Jun\170619[Ridhima_TOMTIM]w and wo blocking protein\RAW\TOMTIM-\R_Gomkale_Linden_TOMTIM-_A10.raw;	1	Intra	null	1.05e-10	YYLIKPKLHPVSNSK(7)-IALVHLEAKESK(9):0	TIM21_YEAST	TIM21_YEAST	sp|P53220|TIM21_YEAST	sp|P53220|TIM21_YEAST	sp|P53220|TIM21_YEAST(219)-sp|P53220|TIM21_YEAST(190)	9	219	190	7323	9.97881	5503;	File: "Z:\alinden\DATA\2017\06_Jun\170619[Ridhima_TOMTIM]w and wo blocking protein\RAW\TOMTIM-\R_Gomkale_Linden_TOMTIM-_A10.raw"; ID: "5503"; scans: "7323"	0.453729
no	DSS	271	1271	3260.85	2.00724	0	none	Z:\alinden\DATA\2017\06_Jun\170619[Ridhima_TOMTIM]w and wo blocking protein\RAW\TOMTIM-\R_Gomkale_Linden_TOMTIM-_A10.raw;	1	Intra	null	1.01e-10	YYLIKPKLHPVSNSK(7)-IALVHLEAKESK(9):0	TIM21_YEAST	TIM21_YEAST	sp|P53220|TIM21_YEAST	sp|P53220|TIM21_YEAST	sp|P53220|TIM21_YEAST(219)-sp|P53220|TIM21_YEAST(190)	9	219	190	7354	9.99568	5533;	File: "Z:\alinden\DATA\2017\06_Jun\170619[Ridhima_TOMTIM]w and wo blocking protein\RAW\TOMTIM-\R_Gomkale_Linden_TOMTIM-_A10.raw"; ID: "5533"; scans: "7354"	614.988
no	DSS	272	1272	3260.85	0.00416	0	none	Z:\alinden\DATA\2017\06_Jun\170619[Ridhima_TOMTIM]w and wo blocking protein\RAW\TOMTIM-\R_Gomkale_Linden_TOMTIM-_A10.raw;	1	Intra	null	1.07e-16	YYLIKPKLHPVSNSK(7)-IALVHLEAKESK(9):0	TIM21_YEAST	TIM21_YEAST	sp|P53220|TIM21_YEAST	sp|P53220|TIM21_YEAST	sp|P53220|TIM21_YEAST(219)-sp|P53220|TIM21_YEAST(190)	9	219	190	7400	15.9706	5576;	File: "Z:\alinden\DATA\2017\06_Jun\170619[Ridhima_TOMTIM]w and wo blocking protein\RAW\TOMTIM-\R_Gomkale_Linden_TOMTIM-_A10.raw"; ID: "5576"; scans: "7400"	1.27534
no	DSS	273	1273	4181.05	3.97382	0	none	Z:\alinden\DATA\2017\06_Jun\170619[Ridhima_TOMTIM]w and wo blocking protein\RAW\TOMTIM-\R_Gomkale_Linden_TOMTIM-_A10.raw;	1	Inter	null	0.000266	TEEISQEKENAEPTDSAEATEAEEK(8)-VIVVHKSTIQR(6):0	MDM38_YEAST	IDH2_YEAST	sp|Q08179|MDM38_YEAST	sp|P28241|IDH2_YEAST	sp|Q08179|MDM38_YEAST(488)-sp|P28241|IDH2_YEAST(204)	1	488	204	7463	3.57512	5634;	File: "Z:\alinden\DATA\2017\06_Jun\170619[Ridhima_TOMTIM]w and wo blocking protein\RAW\TOMTIM-\R_Gomkale_Linden_TOMTIM-_A10.raw"; ID: "5634"; scans: "7463"	949.305
no	DSS	274	1274	3662.88	0.00063	0	none	Z:\alinden\DATA\2017\06_Jun\170619[Ridhima_TOMTIM]w and wo blocking protein\RAW\TOMTIM-\R_Gomkale_Linden_TOMTIM-_A10.raw;	1	Intra	7,M(Oxidation[M]);	2.72e-11	KELDSAMAGDNAGVLLR(1)-KGEELEIVGHNSTPLK(1):0	EFTU_YEAST	EFTU_YEAST	sp|P02992|EFTU_YEAST	sp|P02992|EFTU_YEAST	sp|P02992|EFTU_YEAST(303)-sp|P02992|EFTU_YEAST(277)	21	303	277	7796	10.5654	5946;	File: "Z:\alinden\DATA\2017\06_Jun\170619[Ridhima_TOMTIM]w and wo blocking protein\RAW\TOMTIM-\R_Gomkale_Linden_TOMTIM-_A10.raw"; ID: "5946"; scans: "7796"	0.171948
no	DSS	275	1275	3662.88	-0.00067	0	none	Z:\alinden\DATA\2017\06_Jun\170619[Ridhima_TOMTIM]w and wo blocking protein\RAW\TOMTIM-\R_Gomkale_Linden_TOMTIM-_A10.raw;	1	Intra	7,M(Oxidation[M]);	3.6e-16	KELDSAMAGDNAGVLLR(1)-KGEELEIVGHNSTPLK(1):0	EFTU_YEAST	EFTU_YEAST	sp|P02992|EFTU_YEAST	sp|P02992|EFTU_YEAST	sp|P02992|EFTU_YEAST(303)-sp|P02992|EFTU_YEAST(277)	21	303	277	7815	15.4437	5964;	File: "Z:\alinden\DATA\2017\06_Jun\170619[Ridhima_TOMTIM]w and wo blocking protein\RAW\TOMTIM-\R_Gomkale_Linden_TOMTIM-_A10.raw"; ID: "5964"; scans: "7815"	-0.182866
no	DSS	276	1276	3662.88	3.02479	0	none	Z:\alinden\DATA\2017\06_Jun\170619[Ridhima_TOMTIM]w and wo blocking protein\RAW\TOMTIM-\R_Gomkale_Linden_TOMTIM-_A10.raw;	1	Intra	7,M(Oxidation[M]);	6.43e-14	KELDSAMAGDNAGVLLR(1)-KGEELEIVGHNSTPLK(1):0	EFTU_YEAST	EFTU_YEAST	sp|P02992|EFTU_YEAST	sp|P02992|EFTU_YEAST	sp|P02992|EFTU_YEAST(303)-sp|P02992|EFTU_YEAST(277)	21	303	277	7828	13.1918	5977;	File: "Z:\alinden\DATA\2017\06_Jun\170619[Ridhima_TOMTIM]w and wo blocking protein\RAW\TOMTIM-\R_Gomkale_Linden_TOMTIM-_A10.raw"; ID: "5977"; scans: "7828"	824.887
no	DSS	277	1277	5707.9	0.99863	0	none	Z:\alinden\DATA\2017\06_Jun\170619[Ridhima_TOMTIM]w and wo blocking protein\RAW\TOMTIM-\R_Gomkale_Linden_TOMTIM-_A10.raw;	1	Intra	39,M(Oxidation[M]);	1.35e-09	EMLNHNLITKQTGIAGKPVSAVYIVK(10)-GHFDTGYKSGVHMIESPQQAEDVAK(8):0	SUCB_YEAST	SUCB_YEAST	sp|P53312|SUCB_YEAST	sp|P53312|SUCB_YEAST	sp|P53312|SUCB_YEAST(121)-sp|P53312|SUCB_YEAST(94)	35	121	94	7860	8.86967	6006;	File: "Z:\alinden\DATA\2017\06_Jun\170619[Ridhima_TOMTIM]w and wo blocking protein\RAW\TOMTIM-\R_Gomkale_Linden_TOMTIM-_A10.raw"; ID: "6006"; scans: "7860"	174.894
no	DSS	278	1278	3320.8	1.00288	0	none	Z:\alinden\DATA\2017\06_Jun\170619[Ridhima_TOMTIM]w and wo blocking protein\RAW\TOMTIM-\R_Gomkale_Linden_TOMTIM-_A10.raw;	1	Intra	null	9.09e-07	GAKGVATDLSHIPTNSVVK(3)-IQFGGDEVVKAK(10):0	MDHM_YEAST	MDHM_YEAST	sp|P17505|MDHM_YEAST	sp|P17505|MDHM_YEAST	sp|P17505|MDHM_YEAST(55)-sp|P17505|MDHM_YEAST(233)	5	55	233	7947	6.04144	6088;	File: "Z:\alinden\DATA\2017\06_Jun\170619[Ridhima_TOMTIM]w and wo blocking protein\RAW\TOMTIM-\R_Gomkale_Linden_TOMTIM-_A10.raw"; ID: "6088"; scans: "7947"	301.817
no	DSS	279	1279	3320.8	-0.00019	0	none	Z:\alinden\DATA\2017\06_Jun\170619[Ridhima_TOMTIM]w and wo blocking protein\RAW\TOMTIM-\R_Gomkale_Linden_TOMTIM-_A10.raw;	1	Intra	null	2.2e-05	GAKGVATDLSHIPTNSVVK(3)-IQFGGDEVVKAK(10):0	MDHM_YEAST	MDHM_YEAST	sp|P17505|MDHM_YEAST	sp|P17505|MDHM_YEAST	sp|P17505|MDHM_YEAST(55)-sp|P17505|MDHM_YEAST(233)	5	55	233	7959	4.65758	6098;	File: "Z:\alinden\DATA\2017\06_Jun\170619[Ridhima_TOMTIM]w and wo blocking protein\RAW\TOMTIM-\R_Gomkale_Linden_TOMTIM-_A10.raw"; ID: "6098"; scans: "7959"	-0.057198
no	DSS	280	1280	3560.82	1.00093	0	none	Z:\alinden\DATA\2017\06_Jun\170619[Ridhima_TOMTIM]w and wo blocking protein\RAW\TOMTIM-\R_Gomkale_Linden_TOMTIM-_A10.raw;	1	Intra	10,C(Carbamidomethyl[C]);	0.000167	APYGGDLVVCAFSGSHQDAIKK(21)-GFNLQNKKR(7):0	LEU1_YEAST	LEU1_YEAST	sp|P06208|LEU1_YEAST	sp|P06208|LEU1_YEAST	sp|P06208|LEU1_YEAST(374)-sp|P06208|LEU1_YEAST(382)	1	374	382	7962	3.77728	6101;	File: "Z:\alinden\DATA\2017\06_Jun\170619[Ridhima_TOMTIM]w and wo blocking protein\RAW\TOMTIM-\R_Gomkale_Linden_TOMTIM-_A10.raw"; ID: "6101"; scans: "7962"	280.937
no	DSS	281	1281	5877.02	1.0212	0	none	Z:\alinden\DATA\2017\06_Jun\170619[Ridhima_TOMTIM]w and wo blocking protein\RAW\TOMTIM-\R_Gomkale_Linden_TOMTIM-_A10.raw;	1	Intra	null	3.86e-12	GKGHFDTGYKSGVHMIESPQQAEDVAK(10)-EMLNHNLITKQTGIAGKPVSAVYIVK(10):0	SUCB_YEAST	SUCB_YEAST	sp|P53312|SUCB_YEAST	sp|P53312|SUCB_YEAST	sp|P53312|SUCB_YEAST(94)-sp|P53312|SUCB_YEAST(121)	16	94	121	8021	11.4134	6157;	File: "Z:\alinden\DATA\2017\06_Jun\170619[Ridhima_TOMTIM]w and wo blocking protein\RAW\TOMTIM-\R_Gomkale_Linden_TOMTIM-_A10.raw"; ID: "6157"; scans: "8021"	173.701
no	DSS	282	1282	5877.02	2.01573	0	none	Z:\alinden\DATA\2017\06_Jun\170619[Ridhima_TOMTIM]w and wo blocking protein\RAW\TOMTIM-\R_Gomkale_Linden_TOMTIM-_A10.raw;	1	Intra	null	0.000579	GKGHFDTGYKSGVHMIESPQQAEDVAK(10)-EMLNHNLITKQTGIAGKPVSAVYIVK(10):0	SUCB_YEAST	SUCB_YEAST	sp|P53312|SUCB_YEAST	sp|P53312|SUCB_YEAST	sp|P53312|SUCB_YEAST(94)-sp|P53312|SUCB_YEAST(121)	16	94	121	8063	3.23732	6197;	File: "Z:\alinden\DATA\2017\06_Jun\170619[Ridhima_TOMTIM]w and wo blocking protein\RAW\TOMTIM-\R_Gomkale_Linden_TOMTIM-_A10.raw"; ID: "6197"; scans: "8063"	342.809
no	DSS	283	1283	3670.01	1.00572	0	none	Z:\alinden\DATA\2017\06_Jun\170619[Ridhima_TOMTIM]w and wo blocking protein\RAW\TOMTIM-\R_Gomkale_Linden_TOMTIM-_A10.raw;	1	Intra	null	0.00245	ILKYVDIGKNEGATLITGGER(3)-HIYQSAAAGLKK(11):0	ALDH4_YEAST	ALDH4_YEAST	sp|P46367|ALDH4_YEAST	sp|P46367|ALDH4_YEAST	sp|P46367|ALDH4_YEAST(377)-sp|P46367|ALDH4_YEAST(285)	1	377	285	8083	2.61083	6215;	File: "Z:\alinden\DATA\2017\06_Jun\170619[Ridhima_TOMTIM]w and wo blocking protein\RAW\TOMTIM-\R_Gomkale_Linden_TOMTIM-_A10.raw"; ID: "6215"; scans: "8083"	273.887
no	DSS	284	1284	4353.25	0.00666	0	none	Z:\alinden\DATA\2017\06_Jun\170619[Ridhima_TOMTIM]w and wo blocking protein\RAW\TOMTIM-\R_Gomkale_Linden_TOMTIM-_A10.raw;	1	Intra	null	2.61e-11	TLAAKGGANFLDYAAIDKAPEER(5)-SKPHVNIGTIGHVDHGK(2):0	EFTU_YEAST	EFTU_YEAST	sp|P02992|EFTU_YEAST	sp|P02992|EFTU_YEAST	sp|P02992|EFTU_YEAST(75)-sp|P02992|EFTU_YEAST(46)	9	75	46	8132	10.5834	6261;	File: "Z:\alinden\DATA\2017\06_Jun\170619[Ridhima_TOMTIM]w and wo blocking protein\RAW\TOMTIM-\R_Gomkale_Linden_TOMTIM-_A10.raw"; ID: "6261"; scans: "8132"	1.52954
no	DSS	285	1285	3557.75	0.01549	0	none	Z:\alinden\DATA\2017\06_Jun\170619[Ridhima_TOMTIM]w and wo blocking protein\RAW\TOMTIM-\R_Gomkale_Linden_TOMTIM-_A10.raw;	1	Intra	null	3.07e-05	NPSGLPDSPLNDNSKIK(15)-VMGDEFNWSEKKR(11):0	GPDM_YEAST	GPDM_YEAST	sp|P32191|GPDM_YEAST	sp|P32191|GPDM_YEAST	sp|P32191|GPDM_YEAST(311)-sp|P32191|GPDM_YEAST(631)	7	311	631	8187	4.51286	6313;	File: "Z:\alinden\DATA\2017\06_Jun\170619[Ridhima_TOMTIM]w and wo blocking protein\RAW\TOMTIM-\R_Gomkale_Linden_TOMTIM-_A10.raw"; ID: "6313"; scans: "8187"	4.35263
no	DSS	286	1286	2638.47	0.02265	0	none	Z:\alinden\DATA\2017\06_Jun\170619[Ridhima_TOMTIM]w and wo blocking protein\RAW\TOMTIM-\R_Gomkale_Linden_TOMTIM-_A10.raw;	1	Intra	null	1.71e-07	IIEGHKVEITVK(6)-PVKHDIDGQK(3):0	CLPX_YEAST	CLPX_YEAST	sp|P38323|CLPX_YEAST	sp|P38323|CLPX_YEAST	sp|P38323|CLPX_YEAST(239)-sp|P38323|CLPX_YEAST(249)	3	239	249	2069	6.767	636;	File: "Z:\alinden\DATA\2017\06_Jun\170619[Ridhima_TOMTIM]w and wo blocking protein\RAW\TOMTIM-\R_Gomkale_Linden_TOMTIM-_A10.raw"; ID: "636"; scans: "2069"	8.58117
no	DSS	287	1287	4216.03	0.99927	0	none	Z:\alinden\DATA\2017\06_Jun\170619[Ridhima_TOMTIM]w and wo blocking protein\RAW\TOMTIM-\R_Gomkale_Linden_TOMTIM-_A10.raw;	1	Inter	14,C(Carbamidomethyl[C]);	0.00039	FPGDTGSSEVQAACMTVRIQNMANHIKEHR(27)-ESFGKK(5):0	RT28_YEAST	TIM44_YEAST	sp|P21771|RT28_YEAST	sp|Q01852|TIM44_YEAST	sp|P21771|RT28_YEAST(193)-sp|Q01852|TIM44_YEAST(220)	1	193	220	8300	3.40894	6419;	File: "Z:\alinden\DATA\2017\06_Jun\170619[Ridhima_TOMTIM]w and wo blocking protein\RAW\TOMTIM-\R_Gomkale_Linden_TOMTIM-_A10.raw"; ID: "6419"; scans: "8300"	236.904
no	DSS	288	1288	3278.81	0.00928	0	none	Z:\alinden\DATA\2017\06_Jun\170619[Ridhima_TOMTIM]w and wo blocking protein\RAW\TOMTIM-\R_Gomkale_Linden_TOMTIM-_A10.raw;	1	Intra	null	6.32e-11	LGSKGYFIKPTVFGDVK(4)-HIYQSAAAGLKK(11):0	ALDH4_YEAST	ALDH4_YEAST	sp|P46367|ALDH4_YEAST	sp|P46367|ALDH4_YEAST	sp|P46367|ALDH4_YEAST(399)-sp|P46367|ALDH4_YEAST(285)	4	399	285	8387	10.1993	6500;	File: "Z:\alinden\DATA\2017\06_Jun\170619[Ridhima_TOMTIM]w and wo blocking protein\RAW\TOMTIM-\R_Gomkale_Linden_TOMTIM-_A10.raw"; ID: "6500"; scans: "8387"	2.82942
no	DSS	289	1289	5019.6	2.04044	0	none	Z:\alinden\DATA\2017\06_Jun\170619[Ridhima_TOMTIM]w and wo blocking protein\RAW\TOMTIM-\R_Gomkale_Linden_TOMTIM-_A10.raw;	1	Inter	null	0.00119	KLNVPGFWPDPATLNQIPKEPYEIK(19)-QTDHKEGVYEAVESLKR(5):0	PT100_YEAST	IDH1_YEAST	sp|P38958|PT100_YEAST	sp|P28834|IDH1_YEAST	sp|P38958|PT100_YEAST(60)-sp|P28834|IDH1_YEAST(71)	2	60	71	8421	2.92445	6533;	File: "Z:\alinden\DATA\2017\06_Jun\170619[Ridhima_TOMTIM]w and wo blocking protein\RAW\TOMTIM-\R_Gomkale_Linden_TOMTIM-_A10.raw"; ID: "6533"; scans: "8421"	406.248
no	DSS	290	1290	3967.16	0.00129	0	none	Z:\alinden\DATA\2017\06_Jun\170619[Ridhima_TOMTIM]w and wo blocking protein\RAW\TOMTIM-\R_Gomkale_Linden_TOMTIM-_A10.raw;	1	Inter	null	1.78e-10	QTDHKEGVYEAVESLKR(5)-NLVALKGPLATPIGKGHR(15):0	IDH1_YEAST	IDH2_YEAST	sp|P28834|IDH1_YEAST	sp|P28241|IDH2_YEAST	sp|P28834|IDH1_YEAST(71)-sp|P28241|IDH2_YEAST(109)	48	71	109	8424	9.74958	6535;	File: "Z:\alinden\DATA\2017\06_Jun\170619[Ridhima_TOMTIM]w and wo blocking protein\RAW\TOMTIM-\R_Gomkale_Linden_TOMTIM-_A10.raw"; ID: "6535"; scans: "8424"	0.325087
no	DSS	291	1291	3967.16	0.00228	0	none	Z:\alinden\DATA\2017\06_Jun\170619[Ridhima_TOMTIM]w and wo blocking protein\RAW\TOMTIM-\R_Gomkale_Linden_TOMTIM-_A10.raw;	1	Inter	null	3.01e-13	QTDHKEGVYEAVESLKR(5)-NLVALKGPLATPIGKGHR(15):0	IDH1_YEAST	IDH2_YEAST	sp|P28834|IDH1_YEAST	sp|P28241|IDH2_YEAST	sp|P28834|IDH1_YEAST(71)-sp|P28241|IDH2_YEAST(109)	48	71	109	8452	12.5214	6562;	File: "Z:\alinden\DATA\2017\06_Jun\170619[Ridhima_TOMTIM]w and wo blocking protein\RAW\TOMTIM-\R_Gomkale_Linden_TOMTIM-_A10.raw"; ID: "6562"; scans: "8452"	0.574572
no	DSS	292	1292	3967.16	0.00416	0	none	Z:\alinden\DATA\2017\06_Jun\170619[Ridhima_TOMTIM]w and wo blocking protein\RAW\TOMTIM-\R_Gomkale_Linden_TOMTIM-_A10.raw;	1	Inter	null	0.000375	QTDHKEGVYEAVESLKR(5)-NLVALKGPLATPIGKGHR(6):0	IDH1_YEAST	IDH2_YEAST	sp|P28834|IDH1_YEAST	sp|P28241|IDH2_YEAST	sp|P28834|IDH1_YEAST(71)-sp|P28241|IDH2_YEAST(100)	3	71	100	8455	3.42597	6564;	File: "Z:\alinden\DATA\2017\06_Jun\170619[Ridhima_TOMTIM]w and wo blocking protein\RAW\TOMTIM-\R_Gomkale_Linden_TOMTIM-_A10.raw"; ID: "6564"; scans: "8455"	1.04834
no	DSS	293	1293	4672.41	1.0091	0	none	Z:\alinden\DATA\2017\06_Jun\170619[Ridhima_TOMTIM]w and wo blocking protein\RAW\TOMTIM-\R_Gomkale_Linden_TOMTIM-_A10.raw;	1	Intra	22,C(Carbamidomethyl[C]);	2.66e-10	QMAEETVDKVVEVGGFHNLKPCHTR(9)-LIKDPTSGKVIGAEAR(9):0	GPDM_YEAST	GPDM_YEAST	sp|P32191|GPDM_YEAST	sp|P32191|GPDM_YEAST	sp|P32191|GPDM_YEAST(475)-sp|P32191|GPDM_YEAST(258)	5	475	258	8488	9.57512	6595;	File: "Z:\alinden\DATA\2017\06_Jun\170619[Ridhima_TOMTIM]w and wo blocking protein\RAW\TOMTIM-\R_Gomkale_Linden_TOMTIM-_A10.raw"; ID: "6595"; scans: "8488"	215.877
no	DSS	294	1294	4622.34	3.01384	0	none	Z:\alinden\DATA\2017\06_Jun\170619[Ridhima_TOMTIM]w and wo blocking protein\RAW\TOMTIM-\R_Gomkale_Linden_TOMTIM-_A10.raw;	1	Inter	null	5.52e-09	VIFQGFTGKQGTFHASISQEYGTNVVGGTNPK(9)-LQGTKVEEGR(5):0	SUCA_YEAST	SUCB_YEAST	sp|P53598|SUCA_YEAST	sp|P53312|SUCB_YEAST	sp|P53598|SUCA_YEAST(47)-sp|P53312|SUCB_YEAST(393)	5	47	393	8495	8.25806	6602;	File: "Z:\alinden\DATA\2017\06_Jun\170619[Ridhima_TOMTIM]w and wo blocking protein\RAW\TOMTIM-\R_Gomkale_Linden_TOMTIM-_A10.raw"; ID: "6602"; scans: "8495"	651.449
no	DSS	295	1295	3967.16	0.01074	0	none	Z:\alinden\DATA\2017\06_Jun\170619[Ridhima_TOMTIM]w and wo blocking protein\RAW\TOMTIM-\R_Gomkale_Linden_TOMTIM-_A10.raw;	1	Inter	null	9.61e-09	QTDHKEGVYEAVESLKR(5)-NLVALKGPLATPIGKGHR(15):0	IDH1_YEAST	IDH2_YEAST	sp|P28834|IDH1_YEAST	sp|P28241|IDH2_YEAST	sp|P28834|IDH1_YEAST(71)-sp|P28241|IDH2_YEAST(109)	48	71	109	8545	8.01728	6649;	File: "Z:\alinden\DATA\2017\06_Jun\170619[Ridhima_TOMTIM]w and wo blocking protein\RAW\TOMTIM-\R_Gomkale_Linden_TOMTIM-_A10.raw"; ID: "6649"; scans: "8545"	2.70653
no	DSS	296	1296	5691.91	2.002	0	none	Z:\alinden\DATA\2017\06_Jun\170619[Ridhima_TOMTIM]w and wo blocking protein\RAW\TOMTIM-\R_Gomkale_Linden_TOMTIM-_A10.raw;	1	Intra	null	9.26e-15	EMLNHNLITKQTGIAGKPVSAVYIVK(10)-GHFDTGYKSGVHMIESPQQAEDVAK(8):0	SUCB_YEAST	SUCB_YEAST	sp|P53312|SUCB_YEAST	sp|P53312|SUCB_YEAST	sp|P53312|SUCB_YEAST(121)-sp|P53312|SUCB_YEAST(94)	35	121	94	8702	14.0334	6798;	File: "Z:\alinden\DATA\2017\06_Jun\170619[Ridhima_TOMTIM]w and wo blocking protein\RAW\TOMTIM-\R_Gomkale_Linden_TOMTIM-_A10.raw"; ID: "6798"; scans: "8702"	351.542
no	DSS	297	1297	4150.18	1.00563	0	none	Z:\alinden\DATA\2017\06_Jun\170619[Ridhima_TOMTIM]w and wo blocking protein\RAW\TOMTIM-\R_Gomkale_Linden_TOMTIM-_A10.raw;	1	Intra	null	0.000258	VLEDKYGATKVISESQNNDK(10)-TFAKEVLSKILGENAR(9):0	ETR1_YEAST	ETR1_YEAST	sp|P38071|ETR1_YEAST	sp|P38071|ETR1_YEAST	sp|P38071|ETR1_YEAST(228)-sp|P38071|ETR1_YEAST(247)	1	228	247	8710	3.58838	6805;	File: "Z:\alinden\DATA\2017\06_Jun\170619[Ridhima_TOMTIM]w and wo blocking protein\RAW\TOMTIM-\R_Gomkale_Linden_TOMTIM-_A10.raw"; ID: "6805"; scans: "8710"	242.193
no	DSS	298	1298	3646.89	0.00424	0	none	Z:\alinden\DATA\2017\06_Jun\170619[Ridhima_TOMTIM]w and wo blocking protein\RAW\TOMTIM-\R_Gomkale_Linden_TOMTIM-_A10.raw;	1	Intra	null	1.96e-13	KELDSAMAGDNAGVLLR(1)-KGEELEIVGHNSTPLK(1):0	EFTU_YEAST	EFTU_YEAST	sp|P02992|EFTU_YEAST	sp|P02992|EFTU_YEAST	sp|P02992|EFTU_YEAST(303)-sp|P02992|EFTU_YEAST(277)	21	303	277	8886	12.7077	6970;	File: "Z:\alinden\DATA\2017\06_Jun\170619[Ridhima_TOMTIM]w and wo blocking protein\RAW\TOMTIM-\R_Gomkale_Linden_TOMTIM-_A10.raw"; ID: "6970"; scans: "8886"	1.16231
no	DSS	299	1299	3646.89	-0.0094	0	none	Z:\alinden\DATA\2017\06_Jun\170619[Ridhima_TOMTIM]w and wo blocking protein\RAW\TOMTIM-\R_Gomkale_Linden_TOMTIM-_A10.raw;	1	Intra	null	1.19e-09	KELDSAMAGDNAGVLLR(1)-KGEELEIVGHNSTPLK(1):0	EFTU_YEAST	EFTU_YEAST	sp|P02992|EFTU_YEAST	sp|P02992|EFTU_YEAST	sp|P02992|EFTU_YEAST(303)-sp|P02992|EFTU_YEAST(277)	21	303	277	8892	8.92445	6976;	File: "Z:\alinden\DATA\2017\06_Jun\170619[Ridhima_TOMTIM]w and wo blocking protein\RAW\TOMTIM-\R_Gomkale_Linden_TOMTIM-_A10.raw"; ID: "6976"; scans: "8892"	-2.57683
no	DSS	300	1300	3646.89	0.00334	0	none	Z:\alinden\DATA\2017\06_Jun\170619[Ridhima_TOMTIM]w and wo blocking protein\RAW\TOMTIM-\R_Gomkale_Linden_TOMTIM-_A10.raw;	1	Intra	null	6.82e-23	KELDSAMAGDNAGVLLR(1)-KGEELEIVGHNSTPLK(1):0	EFTU_YEAST	EFTU_YEAST	sp|P02992|EFTU_YEAST	sp|P02992|EFTU_YEAST	sp|P02992|EFTU_YEAST(303)-sp|P02992|EFTU_YEAST(277)	21	303	277	8911	22.1662	6994;	File: "Z:\alinden\DATA\2017\06_Jun\170619[Ridhima_TOMTIM]w and wo blocking protein\RAW\TOMTIM-\R_Gomkale_Linden_TOMTIM-_A10.raw"; ID: "6994"; scans: "8911"	0.915596
no	DSS	301	1301	3662.88	-0.00222	0	none	Z:\alinden\DATA\2017\06_Jun\170619[Ridhima_TOMTIM]w and wo blocking protein\RAW\TOMTIM-\R_Gomkale_Linden_TOMTIM-_A10.raw;	1	Intra	7,M(Oxidation[M]);	0.00103	KELDSAMAGDNAGVLLR(1)-KGEELEIVGHNSTPLK(1):0	EFTU_YEAST	EFTU_YEAST	sp|P02992|EFTU_YEAST	sp|P02992|EFTU_YEAST	sp|P02992|EFTU_YEAST(303)-sp|P02992|EFTU_YEAST(277)	21	303	277	8921	2.98716	7003;	File: "Z:\alinden\DATA\2017\06_Jun\170619[Ridhima_TOMTIM]w and wo blocking protein\RAW\TOMTIM-\R_Gomkale_Linden_TOMTIM-_A10.raw"; ID: "7003"; scans: "8921"	-0.605914
no	DSS	302	1302	3662.88	-0.00157	0	none	Z:\alinden\DATA\2017\06_Jun\170619[Ridhima_TOMTIM]w and wo blocking protein\RAW\TOMTIM-\R_Gomkale_Linden_TOMTIM-_A10.raw;	1	Intra	7,M(Oxidation[M]);	0.000295	KELDSAMAGDNAGVLLR(1)-KGEELEIVGHNSTPLK(1):0	EFTU_YEAST	EFTU_YEAST	sp|P02992|EFTU_YEAST	sp|P02992|EFTU_YEAST	sp|P02992|EFTU_YEAST(303)-sp|P02992|EFTU_YEAST(277)	21	303	277	8922	3.53018	7004;	File: "Z:\alinden\DATA\2017\06_Jun\170619[Ridhima_TOMTIM]w and wo blocking protein\RAW\TOMTIM-\R_Gomkale_Linden_TOMTIM-_A10.raw"; ID: "7004"; scans: "8922"	-0.428507
no	DSS	303	1303	5173.66	3.02138	0	none	Z:\alinden\DATA\2017\06_Jun\170619[Ridhima_TOMTIM]w and wo blocking protein\RAW\TOMTIM-\R_Gomkale_Linden_TOMTIM-_A10.raw;	1	Intra	null	7.95e-05	VIFQGFTGKQGTFHASISQEYGTNVVGGTNPK(9)-KAGQTHLGQPVFASVK(1):0	SUCA_YEAST	SUCA_YEAST	sp|P53598|SUCA_YEAST	sp|P53598|SUCA_YEAST	sp|P53598|SUCA_YEAST(47)-sp|P53598|SUCA_YEAST(71)	17	47	71	9054	4.09963	7129;	File: "Z:\alinden\DATA\2017\06_Jun\170619[Ridhima_TOMTIM]w and wo blocking protein\RAW\TOMTIM-\R_Gomkale_Linden_TOMTIM-_A10.raw"; ID: "7129"; scans: "9054"	583.538
no	DSS	304	1304	5173.66	0.0128	0	none	Z:\alinden\DATA\2017\06_Jun\170619[Ridhima_TOMTIM]w and wo blocking protein\RAW\TOMTIM-\R_Gomkale_Linden_TOMTIM-_A10.raw;	1	Intra	null	8.58e-07	VIFQGFTGKQGTFHASISQEYGTNVVGGTNPK(9)-KAGQTHLGQPVFASVK(1):0	SUCA_YEAST	SUCA_YEAST	sp|P53598|SUCA_YEAST	sp|P53598|SUCA_YEAST	sp|P53598|SUCA_YEAST(47)-sp|P53598|SUCA_YEAST(71)	17	47	71	9067	6.06651	7141;	File: "Z:\alinden\DATA\2017\06_Jun\170619[Ridhima_TOMTIM]w and wo blocking protein\RAW\TOMTIM-\R_Gomkale_Linden_TOMTIM-_A10.raw"; ID: "7141"; scans: "9067"	2.47358
no	DSS	305	1305	3131.71	0.0009	0	none	Z:\alinden\DATA\2017\06_Jun\170619[Ridhima_TOMTIM]w and wo blocking protein\RAW\TOMTIM-\R_Gomkale_Linden_TOMTIM-_A10.raw;	1	Inter	null	1.89e-08	VAFTGSTATGRHIYQSAAAGLKK(22)-GITGKGK(5):0	ALDH4_YEAST	ETR1_YEAST	sp|P46367|ALDH4_YEAST	sp|P38071|ETR1_YEAST	sp|P46367|ALDH4_YEAST(285)-sp|P38071|ETR1_YEAST(370)	25	285	370	9147	7.72354	7216;	File: "Z:\alinden\DATA\2017\06_Jun\170619[Ridhima_TOMTIM]w and wo blocking protein\RAW\TOMTIM-\R_Gomkale_Linden_TOMTIM-_A10.raw"; ID: "7216"; scans: "9147"	0.287291
no	DSS	306	1306	3131.71	0.00221	0	none	Z:\alinden\DATA\2017\06_Jun\170619[Ridhima_TOMTIM]w and wo blocking protein\RAW\TOMTIM-\R_Gomkale_Linden_TOMTIM-_A10.raw;	1	Inter	null	0.000151	VAFTGSTATGRHIYQSAAAGLKK(22)-GITGKGK(5):0	ALDH4_YEAST	ETR1_YEAST	sp|P46367|ALDH4_YEAST	sp|P38071|ETR1_YEAST	sp|P46367|ALDH4_YEAST(285)-sp|P38071|ETR1_YEAST(370)	25	285	370	9148	3.82102	7217;	File: "Z:\alinden\DATA\2017\06_Jun\170619[Ridhima_TOMTIM]w and wo blocking protein\RAW\TOMTIM-\R_Gomkale_Linden_TOMTIM-_A10.raw"; ID: "7217"; scans: "9148"	0.705458
no	DSS	307	1307	3131.71	0.00082	0	none	Z:\alinden\DATA\2017\06_Jun\170619[Ridhima_TOMTIM]w and wo blocking protein\RAW\TOMTIM-\R_Gomkale_Linden_TOMTIM-_A10.raw;	1	Inter	null	0.000677	VAFTGSTATGRHIYQSAAAGLKK(22)-GITGKGK(5):0	ALDH4_YEAST	ETR1_YEAST	sp|P46367|ALDH4_YEAST	sp|P38071|ETR1_YEAST	sp|P46367|ALDH4_YEAST(285)-sp|P38071|ETR1_YEAST(370)	25	285	370	9248	3.16941	7311;	File: "Z:\alinden\DATA\2017\06_Jun\170619[Ridhima_TOMTIM]w and wo blocking protein\RAW\TOMTIM-\R_Gomkale_Linden_TOMTIM-_A10.raw"; ID: "7311"; scans: "9248"	0.261754
no	DSS	308	1308	3131.71	2e-05	0	none	Z:\alinden\DATA\2017\06_Jun\170619[Ridhima_TOMTIM]w and wo blocking protein\RAW\TOMTIM-\R_Gomkale_Linden_TOMTIM-_A10.raw;	1	Inter	null	6.97e-05	VAFTGSTATGRHIYQSAAAGLKK(22)-GITGKGK(5):0	ALDH4_YEAST	ETR1_YEAST	sp|P46367|ALDH4_YEAST	sp|P38071|ETR1_YEAST	sp|P46367|ALDH4_YEAST(285)-sp|P38071|ETR1_YEAST(370)	25	285	370	9264	4.15677	7326;	File: "Z:\alinden\DATA\2017\06_Jun\170619[Ridhima_TOMTIM]w and wo blocking protein\RAW\TOMTIM-\R_Gomkale_Linden_TOMTIM-_A10.raw"; ID: "7326"; scans: "9264"	0.006384
no	DSS	309	1309	3131.71	0.00297	0	none	Z:\alinden\DATA\2017\06_Jun\170619[Ridhima_TOMTIM]w and wo blocking protein\RAW\TOMTIM-\R_Gomkale_Linden_TOMTIM-_A10.raw;	1	Inter	null	0.000898	VAFTGSTATGRHIYQSAAAGLKK(22)-GITGKGK(5):0	ALDH4_YEAST	ETR1_YEAST	sp|P46367|ALDH4_YEAST	sp|P38071|ETR1_YEAST	sp|P46367|ALDH4_YEAST(285)-sp|P38071|ETR1_YEAST(370)	25	285	370	9369	3.04672	7425;	File: "Z:\alinden\DATA\2017\06_Jun\170619[Ridhima_TOMTIM]w and wo blocking protein\RAW\TOMTIM-\R_Gomkale_Linden_TOMTIM-_A10.raw"; ID: "7425"; scans: "9369"	0.948058
no	DSS	310	1310	3131.71	0.00142	0	none	Z:\alinden\DATA\2017\06_Jun\170619[Ridhima_TOMTIM]w and wo blocking protein\RAW\TOMTIM-\R_Gomkale_Linden_TOMTIM-_A10.raw;	1	Inter	null	3.37e-05	VAFTGSTATGRHIYQSAAAGLKK(22)-GITGKGK(5):0	ALDH4_YEAST	ETR1_YEAST	sp|P46367|ALDH4_YEAST	sp|P38071|ETR1_YEAST	sp|P46367|ALDH4_YEAST(285)-sp|P38071|ETR1_YEAST(370)	25	285	370	9387	4.47237	7442;	File: "Z:\alinden\DATA\2017\06_Jun\170619[Ridhima_TOMTIM]w and wo blocking protein\RAW\TOMTIM-\R_Gomkale_Linden_TOMTIM-_A10.raw"; ID: "7442"; scans: "9387"	0.453281
no	DSS	311	1311	3131.71	0.00038	0	none	Z:\alinden\DATA\2017\06_Jun\170619[Ridhima_TOMTIM]w and wo blocking protein\RAW\TOMTIM-\R_Gomkale_Linden_TOMTIM-_A10.raw;	1	Inter	null	1.45e-05	VAFTGSTATGRHIYQSAAAGLKK(22)-GITGKGK(5):0	ALDH4_YEAST	ETR1_YEAST	sp|P46367|ALDH4_YEAST	sp|P38071|ETR1_YEAST	sp|P46367|ALDH4_YEAST(285)-sp|P38071|ETR1_YEAST(370)	25	285	370	9390	4.83863	7445;	File: "Z:\alinden\DATA\2017\06_Jun\170619[Ridhima_TOMTIM]w and wo blocking protein\RAW\TOMTIM-\R_Gomkale_Linden_TOMTIM-_A10.raw"; ID: "7445"; scans: "9390"	0.1213
no	DSS	312	1312	3594.96	0.98528	0	none	Z:\alinden\DATA\2017\06_Jun\170619[Ridhima_TOMTIM]w and wo blocking protein\RAW\TOMTIM-\R_Gomkale_Linden_TOMTIM-_A10.raw;	1	Inter	null	0.0031	IMLANHPDKGGSPFLATKINEAK(18)-FKIKQTGGK(2):0	TIM14_YEAST	RM11_YEAST	sp|Q07914|TIM14_YEAST	sp|P36521|RM11_YEAST	sp|Q07914|TIM14_YEAST(153)-sp|P36521|RM11_YEAST(86)	3	153	86	9561	2.50864	7606;	File: "Z:\alinden\DATA\2017\06_Jun\170619[Ridhima_TOMTIM]w and wo blocking protein\RAW\TOMTIM-\R_Gomkale_Linden_TOMTIM-_A10.raw"; ID: "7606"; scans: "9561"	273.921
no	DSS	313	1313	4035.29	3.0077	0	none	Z:\alinden\DATA\2017\06_Jun\170619[Ridhima_TOMTIM]w and wo blocking protein\RAW\TOMTIM-\R_Gomkale_Linden_TOMTIM-_A10.raw;	1	Inter	null	1.49e-05	SVTAVHKANIMKLGDGLFR(12)-NLVALKGPLATPIGKGHR(15):0	IDH1_YEAST	IDH2_YEAST	sp|P28834|IDH1_YEAST	sp|P28241|IDH2_YEAST	sp|P28834|IDH1_YEAST(199)-sp|P28241|IDH2_YEAST(109)	16	199	109	9803	4.82681	7834;	File: "Z:\alinden\DATA\2017\06_Jun\170619[Ridhima_TOMTIM]w and wo blocking protein\RAW\TOMTIM-\R_Gomkale_Linden_TOMTIM-_A10.raw"; ID: "7834"; scans: "9803"	744.608
no	DSS	314	1314	4035.29	0.00648	0	none	Z:\alinden\DATA\2017\06_Jun\170619[Ridhima_TOMTIM]w and wo blocking protein\RAW\TOMTIM-\R_Gomkale_Linden_TOMTIM-_A10.raw;	1	Inter	null	4.85e-07	SVTAVHKANIMKLGDGLFR(12)-NLVALKGPLATPIGKGHR(15):0	IDH1_YEAST	IDH2_YEAST	sp|P28834|IDH1_YEAST	sp|P28241|IDH2_YEAST	sp|P28834|IDH1_YEAST(199)-sp|P28241|IDH2_YEAST(109)	16	199	109	9826	6.31426	7855;	File: "Z:\alinden\DATA\2017\06_Jun\170619[Ridhima_TOMTIM]w and wo blocking protein\RAW\TOMTIM-\R_Gomkale_Linden_TOMTIM-_A10.raw"; ID: "7855"; scans: "9826"	1.60543
no	DSS	315	1315	4035.29	1.01266	0	none	Z:\alinden\DATA\2017\06_Jun\170619[Ridhima_TOMTIM]w and wo blocking protein\RAW\TOMTIM-\R_Gomkale_Linden_TOMTIM-_A10.raw;	1	Inter	null	3.34e-14	SVTAVHKANIMKLGDGLFR(12)-NLVALKGPLATPIGKGHR(15):0	IDH1_YEAST	IDH2_YEAST	sp|P28834|IDH1_YEAST	sp|P28241|IDH2_YEAST	sp|P28834|IDH1_YEAST(199)-sp|P28241|IDH2_YEAST(109)	16	199	109	9837	13.4763	7866;	File: "Z:\alinden\DATA\2017\06_Jun\170619[Ridhima_TOMTIM]w and wo blocking protein\RAW\TOMTIM-\R_Gomkale_Linden_TOMTIM-_A10.raw"; ID: "7866"; scans: "9837"	250.825
no	DSS	316	1316	3467.79	-0.01444	0	none	Z:\alinden\DATA\2017\06_Jun\170619[Ridhima_TOMTIM]w and wo blocking protein\RAW\TOMTIM-\R_Gomkale_Linden_TOMTIM-_A10.raw;	1	Inter	null	2.96e-05	ILASLYILSKEEGGRHSGFGENYR(10)-MFLPK(1):0	EFTU_YEAST	GLRX5_YEAST	sp|P02992|EFTU_YEAST	sp|Q02784|GLRX5_YEAST	sp|P02992|EFTU_YEAST(353)-sp|Q02784|GLRX5_YEAST(1)	2	353	1	9851	4.52871	7878;	File: "Z:\alinden\DATA\2017\06_Jun\170619[Ridhima_TOMTIM]w and wo blocking protein\RAW\TOMTIM-\R_Gomkale_Linden_TOMTIM-_A10.raw"; ID: "7878"; scans: "9851"	-4.16284
no	DSS	317	1317	3427	-0.00072	0	none	Z:\alinden\DATA\2017\06_Jun\170619[Ridhima_TOMTIM]w and wo blocking protein\RAW\TOMTIM-\R_Gomkale_Linden_TOMTIM-_A10.raw;	1	Intra	null	3.59e-09	NLVALKGPLATPIGKGHR(15)-KTFGLFANVRPAK(1):0	IDH2_YEAST	IDH2_YEAST	sp|P28241|IDH2_YEAST	sp|P28241|IDH2_YEAST	sp|P28241|IDH2_YEAST(109)-sp|P28241|IDH2_YEAST(120)	7	109	120	9870	8.44491	7896;	File: "Z:\alinden\DATA\2017\06_Jun\170619[Ridhima_TOMTIM]w and wo blocking protein\RAW\TOMTIM-\R_Gomkale_Linden_TOMTIM-_A10.raw"; ID: "7896"; scans: "9870"	-0.210035
no	DSS	318	1318	3427	-0.00253	0	none	Z:\alinden\DATA\2017\06_Jun\170619[Ridhima_TOMTIM]w and wo blocking protein\RAW\TOMTIM-\R_Gomkale_Linden_TOMTIM-_A10.raw;	1	Intra	null	9.37e-13	NLVALKGPLATPIGKGHR(15)-KTFGLFANVRPAK(1):0	IDH2_YEAST	IDH2_YEAST	sp|P28241|IDH2_YEAST	sp|P28241|IDH2_YEAST	sp|P28241|IDH2_YEAST(109)-sp|P28241|IDH2_YEAST(120)	7	109	120	9871	12.0283	7897;	File: "Z:\alinden\DATA\2017\06_Jun\170619[Ridhima_TOMTIM]w and wo blocking protein\RAW\TOMTIM-\R_Gomkale_Linden_TOMTIM-_A10.raw"; ID: "7897"; scans: "9871"	-0.738039
no	DSS	319	1319	4035.29	0.00265	0	none	Z:\alinden\DATA\2017\06_Jun\170619[Ridhima_TOMTIM]w and wo blocking protein\RAW\TOMTIM-\R_Gomkale_Linden_TOMTIM-_A10.raw;	1	Inter	null	0.000163	SVTAVHKANIMKLGDGLFR(12)-NLVALKGPLATPIGKGHR(15):0	IDH1_YEAST	IDH2_YEAST	sp|P28834|IDH1_YEAST	sp|P28241|IDH2_YEAST	sp|P28834|IDH1_YEAST(199)-sp|P28241|IDH2_YEAST(109)	16	199	109	9883	3.78781	7909;	File: "Z:\alinden\DATA\2017\06_Jun\170619[Ridhima_TOMTIM]w and wo blocking protein\RAW\TOMTIM-\R_Gomkale_Linden_TOMTIM-_A10.raw"; ID: "7909"; scans: "9883"	0.656541
no	DSS	320	1320	4800.2	1.00996	0	none	Z:\alinden\DATA\2017\06_Jun\170619[Ridhima_TOMTIM]w and wo blocking protein\RAW\TOMTIM-\R_Gomkale_Linden_TOMTIM-_A10.raw;	1	Intra	1,C(Carbamidomethyl[C]);4,C(Carbamidomethyl[C]);	9.58e-13	CWECGSVYKLNPVGVPNDDHHH(9)-KGTMKDPIIIESYDDYR(5):0	COX4_YEAST	COX4_YEAST	sp|P04037|COX4_YEAST	sp|P04037|COX4_YEAST	sp|P04037|COX4_YEAST(142)-sp|P04037|COX4_YEAST(95)	1	142	95	9891	12.0186	7916;	File: "Z:\alinden\DATA\2017\06_Jun\170619[Ridhima_TOMTIM]w and wo blocking protein\RAW\TOMTIM-\R_Gomkale_Linden_TOMTIM-_A10.raw"; ID: "7916"; scans: "9891"	210.311
no	DSS	321	1321	5411.69	4.02508	0	none	Z:\alinden\DATA\2017\06_Jun\170619[Ridhima_TOMTIM]w and wo blocking protein\RAW\TOMTIM-\R_Gomkale_Linden_TOMTIM-_A10.raw;	1	Intra	null	2.08e-10	KIATYQERDPANLPWGSSNVDIAIDSTGVFK(1)-YAGEVSHDDKHIIVDGK(10):0	G3P3_YEAST	G3P3_YEAST	sp|P00359|G3P3_YEAST	sp|P00359|G3P3_YEAST	sp|P00359|G3P3_YEAST(71)-sp|P00359|G3P3_YEAST(63)	12	71	63	10685	9.68194	8662;	File: "Z:\alinden\DATA\2017\06_Jun\170619[Ridhima_TOMTIM]w and wo blocking protein\RAW\TOMTIM-\R_Gomkale_Linden_TOMTIM-_A10.raw"; ID: "8662"; scans: "10685"	743.083
no	DSS	322	1322	5411.69	2.01879	0	none	Z:\alinden\DATA\2017\06_Jun\170619[Ridhima_TOMTIM]w and wo blocking protein\RAW\TOMTIM-\R_Gomkale_Linden_TOMTIM-_A10.raw;	1	Intra	null	1.84e-14	KIATYQERDPANLPWGSSNVDIAIDSTGVFK(1)-YAGEVSHDDKHIIVDGK(10):0	G3P3_YEAST	G3P3_YEAST	sp|P00359|G3P3_YEAST	sp|P00359|G3P3_YEAST	sp|P00359|G3P3_YEAST(71)-sp|P00359|G3P3_YEAST(63)	12	71	63	10706	13.7352	8681;	File: "Z:\alinden\DATA\2017\06_Jun\170619[Ridhima_TOMTIM]w and wo blocking protein\RAW\TOMTIM-\R_Gomkale_Linden_TOMTIM-_A10.raw"; ID: "8681"; scans: "10706"	372.834
no	DSS	323	1323	5411.69	0.00995	0	none	Z:\alinden\DATA\2017\06_Jun\170619[Ridhima_TOMTIM]w and wo blocking protein\RAW\TOMTIM-\R_Gomkale_Linden_TOMTIM-_A10.raw;	1	Intra	null	1.06e-15	KIATYQERDPANLPWGSSNVDIAIDSTGVFK(1)-YAGEVSHDDKHIIVDGK(10):0	G3P3_YEAST	G3P3_YEAST	sp|P00359|G3P3_YEAST	sp|P00359|G3P3_YEAST	sp|P00359|G3P3_YEAST(71)-sp|P00359|G3P3_YEAST(63)	12	71	63	10752	14.9747	8724;	File: "Z:\alinden\DATA\2017\06_Jun\170619[Ridhima_TOMTIM]w and wo blocking protein\RAW\TOMTIM-\R_Gomkale_Linden_TOMTIM-_A10.raw"; ID: "8724"; scans: "10752"	1.83827
no	DSS	324	1324	5115.68	0.96084	0	none	Z:\alinden\DATA\2017\06_Jun\170619[Ridhima_TOMTIM]w and wo blocking protein\RAW\TOMTIM-\R_Gomkale_Linden_TOMTIM-_A10.raw;	1	Inter	null	6.58e-05	EGNVSAYYNGQEYGSSAPPQLGKLHNIKQGIK(28)-QVGVGKLNKLYGGAK(9):0	OM45_YEAST	RS19A_YEAST	sp|P16547|OM45_YEAST	sp|P07280|RS19A_YEAST	sp|P16547|OM45_YEAST(60)-sp|P07280|RS19A_YEAST(78)	1	60	78	10902	4.18177	8865;	File: "Z:\alinden\DATA\2017\06_Jun\170619[Ridhima_TOMTIM]w and wo blocking protein\RAW\TOMTIM-\R_Gomkale_Linden_TOMTIM-_A10.raw"; ID: "8865"; scans: "10902"	187.75
no	DSS	325	1325	3980.94	-0.00396	0	none	Z:\alinden\DATA\2017\06_Jun\170619[Ridhima_TOMTIM]w and wo blocking protein\RAW\TOMTIM-\R_Gomkale_Linden_TOMTIM-_A10.raw;	1	Intra	null	1.39e-05	TETDAFGEIHVPADKYWGAQTQR(15)-SFQNFKIGGAR(6):0	FUMH_YEAST	FUMH_YEAST	sp|P08417|FUMH_YEAST	sp|P08417|FUMH_YEAST	sp|P08417|FUMH_YEAST(44)-sp|P08417|FUMH_YEAST(58)	15	44	58	11036	4.85699	8992;	File: "Z:\alinden\DATA\2017\06_Jun\170619[Ridhima_TOMTIM]w and wo blocking protein\RAW\TOMTIM-\R_Gomkale_Linden_TOMTIM-_A10.raw"; ID: "8992"; scans: "11036"	-0.994488
no	DSS	326	1326	3980.94	-0.00331	0	none	Z:\alinden\DATA\2017\06_Jun\170619[Ridhima_TOMTIM]w and wo blocking protein\RAW\TOMTIM-\R_Gomkale_Linden_TOMTIM-_A10.raw;	1	Intra	null	4.25e-06	TETDAFGEIHVPADKYWGAQTQR(15)-SFQNFKIGGAR(6):0	FUMH_YEAST	FUMH_YEAST	sp|P08417|FUMH_YEAST	sp|P08417|FUMH_YEAST	sp|P08417|FUMH_YEAST(44)-sp|P08417|FUMH_YEAST(58)	15	44	58	11069	5.37161	9023;	File: "Z:\alinden\DATA\2017\06_Jun\170619[Ridhima_TOMTIM]w and wo blocking protein\RAW\TOMTIM-\R_Gomkale_Linden_TOMTIM-_A10.raw"; ID: "9023"; scans: "11069"	-0.831251
no	DSS	327	1327	3980.94	-0.00257	0	none	Z:\alinden\DATA\2017\06_Jun\170619[Ridhima_TOMTIM]w and wo blocking protein\RAW\TOMTIM-\R_Gomkale_Linden_TOMTIM-_A10.raw;	1	Intra	null	8.01e-09	TETDAFGEIHVPADKYWGAQTQR(15)-SFQNFKIGGAR(6):0	FUMH_YEAST	FUMH_YEAST	sp|P08417|FUMH_YEAST	sp|P08417|FUMH_YEAST	sp|P08417|FUMH_YEAST(44)-sp|P08417|FUMH_YEAST(58)	15	44	58	11070	8.09637	9024;	File: "Z:\alinden\DATA\2017\06_Jun\170619[Ridhima_TOMTIM]w and wo blocking protein\RAW\TOMTIM-\R_Gomkale_Linden_TOMTIM-_A10.raw"; ID: "9024"; scans: "11070"	-0.645413
no	DSS	328	1328	4047.03	2.00608	0	none	Z:\alinden\DATA\2017\06_Jun\170619[Ridhima_TOMTIM]w and wo blocking protein\RAW\TOMTIM-\R_Gomkale_Linden_TOMTIM-_A10.raw;	1	Intra	16,M(Oxidation[M]);	2.69e-06	GYFIKPTVFGDVKEDMR(13)-YVDIGKNEGATLITGGER(6):0	ALDH4_YEAST	ALDH4_YEAST	sp|P46367|ALDH4_YEAST	sp|P46367|ALDH4_YEAST	sp|P46367|ALDH4_YEAST(412)-sp|P46367|ALDH4_YEAST(383)	6	412	383	11099	5.57025	9051;	File: "Z:\alinden\DATA\2017\06_Jun\170619[Ridhima_TOMTIM]w and wo blocking protein\RAW\TOMTIM-\R_Gomkale_Linden_TOMTIM-_A10.raw"; ID: "9051"; scans: "11099"	495.323
no	DSS	329	1329	3980.94	1.00896	0	none	Z:\alinden\DATA\2017\06_Jun\170619[Ridhima_TOMTIM]w and wo blocking protein\RAW\TOMTIM-\R_Gomkale_Linden_TOMTIM-_A10.raw;	1	Intra	null	8.89e-07	TETDAFGEIHVPADKYWGAQTQR(15)-SFQNFKIGGAR(6):0	FUMH_YEAST	FUMH_YEAST	sp|P08417|FUMH_YEAST	sp|P08417|FUMH_YEAST	sp|P08417|FUMH_YEAST(44)-sp|P08417|FUMH_YEAST(58)	15	44	58	11182	6.0511	9129;	File: "Z:\alinden\DATA\2017\06_Jun\170619[Ridhima_TOMTIM]w and wo blocking protein\RAW\TOMTIM-\R_Gomkale_Linden_TOMTIM-_A10.raw"; ID: "9129"; scans: "11182"	253.319
no	DSS	330	1330	3576.78	-0.02051	0	none	Z:\alinden\DATA\2017\06_Jun\170619[Ridhima_TOMTIM]w and wo blocking protein\RAW\TOMTIM-\R_Gomkale_Linden_TOMTIM-_A10.raw;	1	Inter	null	5.44e-06	MSWLFGDKTPTDDANAAVGGQDTTKPK(25)-KNISK(1):0	TIM23_YEAST	TOM40_YEAST	sp|P32897|TIM23_YEAST	sp|P23644|TOM40_YEAST	sp|P32897|TIM23_YEAST(25)-sp|P23644|TOM40_YEAST(148)	1	25	148	11188	5.2644	9135;	File: "Z:\alinden\DATA\2017\06_Jun\170619[Ridhima_TOMTIM]w and wo blocking protein\RAW\TOMTIM-\R_Gomkale_Linden_TOMTIM-_A10.raw"; ID: "9135"; scans: "11188"	-5.73263
no	DSS	331	1331	4432.14	3.00922	0	none	Z:\alinden\DATA\2017\06_Jun\170619[Ridhima_TOMTIM]w and wo blocking protein\RAW\TOMTIM-\R_Gomkale_Linden_TOMTIM-_A10.raw;	1	Intra	null	7.68e-17	TIEQSPSFGKFEIDTDANVPR(10)-KMDEAEQLFYKNAETK(11):0	ATPG_YEAST	ATPG_YEAST	sp|P38077|ATPG_YEAST	sp|P38077|ATPG_YEAST	sp|P38077|ATPG_YEAST(229)-sp|P38077|ATPG_YEAST(86)	2	229	86	11208	16.1146	9154;	File: "Z:\alinden\DATA\2017\06_Jun\170619[Ridhima_TOMTIM]w and wo blocking protein\RAW\TOMTIM-\R_Gomkale_Linden_TOMTIM-_A10.raw"; ID: "9154"; scans: "11208"	678.339
no	DSS	332	1332	3980.94	-0.00091	0	none	Z:\alinden\DATA\2017\06_Jun\170619[Ridhima_TOMTIM]w and wo blocking protein\RAW\TOMTIM-\R_Gomkale_Linden_TOMTIM-_A10.raw;	1	Intra	null	0.000346	TETDAFGEIHVPADKYWGAQTQR(15)-SFQNFKIGGAR(6):0	FUMH_YEAST	FUMH_YEAST	sp|P08417|FUMH_YEAST	sp|P08417|FUMH_YEAST	sp|P08417|FUMH_YEAST(44)-sp|P08417|FUMH_YEAST(58)	15	44	58	11221	3.46092	9166;	File: "Z:\alinden\DATA\2017\06_Jun\170619[Ridhima_TOMTIM]w and wo blocking protein\RAW\TOMTIM-\R_Gomkale_Linden_TOMTIM-_A10.raw"; ID: "9166"; scans: "11221"	-0.228531
no	DSS	333	1333	3885.06	0.99889	0	none	Z:\alinden\DATA\2017\06_Jun\170619[Ridhima_TOMTIM]w and wo blocking protein\RAW\TOMTIM-\R_Gomkale_Linden_TOMTIM-_A10.raw;	1	Intra	null	3.49e-10	YVDIGKNEGATLITGGER(6)-LGSKGYFIKPTVFGDVK(4):0	ALDH4_YEAST	ALDH4_YEAST	sp|P46367|ALDH4_YEAST	sp|P46367|ALDH4_YEAST	sp|P46367|ALDH4_YEAST(383)-sp|P46367|ALDH4_YEAST(399)	22	383	399	11269	9.45717	9211;	File: "Z:\alinden\DATA\2017\06_Jun\170619[Ridhima_TOMTIM]w and wo blocking protein\RAW\TOMTIM-\R_Gomkale_Linden_TOMTIM-_A10.raw"; ID: "9211"; scans: "11269"	256.978
no	DSS	334	1334	3885.06	-0.00078	0	none	Z:\alinden\DATA\2017\06_Jun\170619[Ridhima_TOMTIM]w and wo blocking protein\RAW\TOMTIM-\R_Gomkale_Linden_TOMTIM-_A10.raw;	1	Intra	null	4.19e-10	YVDIGKNEGATLITGGER(6)-LGSKGYFIKPTVFGDVK(4):0	ALDH4_YEAST	ALDH4_YEAST	sp|P46367|ALDH4_YEAST	sp|P46367|ALDH4_YEAST	sp|P46367|ALDH4_YEAST(383)-sp|P46367|ALDH4_YEAST(399)	22	383	399	11284	9.37779	9225;	File: "Z:\alinden\DATA\2017\06_Jun\170619[Ridhima_TOMTIM]w and wo blocking protein\RAW\TOMTIM-\R_Gomkale_Linden_TOMTIM-_A10.raw"; ID: "9225"; scans: "11284"	-0.200717
no	DSS	335	1335	3459.78	0.00295	0	none	Z:\alinden\DATA\2017\06_Jun\170619[Ridhima_TOMTIM]w and wo blocking protein\RAW\TOMTIM-\R_Gomkale_Linden_TOMTIM-_A10.raw;	1	Intra	null	6.12e-09	QTDHKEGVYEAVESLKR(5)-ANIMKLGDGLFR(5):0	IDH1_YEAST	IDH1_YEAST	sp|P28834|IDH1_YEAST	sp|P28834|IDH1_YEAST	sp|P28834|IDH1_YEAST(71)-sp|P28834|IDH1_YEAST(199)	6	71	199	11303	8.21325	9243;	File: "Z:\alinden\DATA\2017\06_Jun\170619[Ridhima_TOMTIM]w and wo blocking protein\RAW\TOMTIM-\R_Gomkale_Linden_TOMTIM-_A10.raw"; ID: "9243"; scans: "11303"	0.852406
no	DSS	336	1336	3885.06	0.0047	0	none	Z:\alinden\DATA\2017\06_Jun\170619[Ridhima_TOMTIM]w and wo blocking protein\RAW\TOMTIM-\R_Gomkale_Linden_TOMTIM-_A10.raw;	1	Intra	null	3.59e-16	YVDIGKNEGATLITGGER(6)-LGSKGYFIKPTVFGDVK(4):0	ALDH4_YEAST	ALDH4_YEAST	sp|P46367|ALDH4_YEAST	sp|P46367|ALDH4_YEAST	sp|P46367|ALDH4_YEAST(383)-sp|P46367|ALDH4_YEAST(399)	22	383	399	11306	15.4449	9246;	File: "Z:\alinden\DATA\2017\06_Jun\170619[Ridhima_TOMTIM]w and wo blocking protein\RAW\TOMTIM-\R_Gomkale_Linden_TOMTIM-_A10.raw"; ID: "9246"; scans: "11306"	1.20945
no	DSS	337	1337	3040.73	1.01115	0	none	Z:\alinden\DATA\2017\06_Jun\170619[Ridhima_TOMTIM]w and wo blocking protein\RAW\TOMTIM-\R_Gomkale_Linden_TOMTIM-_A10.raw;	1	Intra	null	4.58e-09	LGSKGYFIKPTVFGDVK(4)-ILKYVDIGK(3):0	ALDH4_YEAST	ALDH4_YEAST	sp|P46367|ALDH4_YEAST	sp|P46367|ALDH4_YEAST	sp|P46367|ALDH4_YEAST(399)-sp|P46367|ALDH4_YEAST(377)	9	399	377	11327	8.33913	9266;	File: "Z:\alinden\DATA\2017\06_Jun\170619[Ridhima_TOMTIM]w and wo blocking protein\RAW\TOMTIM-\R_Gomkale_Linden_TOMTIM-_A10.raw"; ID: "9266"; scans: "11327"	332.315
no	DSS	338	1338	4442.42	2.01073	0	none	Z:\alinden\DATA\2017\06_Jun\170619[Ridhima_TOMTIM]w and wo blocking protein\RAW\TOMTIM-\R_Gomkale_Linden_TOMTIM-_A10.raw;	1	Intra	null	2.99e-05	NKIGLKGLWHTPADQTGHGSLNVALR(6)-KQLDIYANVALFK(1):0	IDH1_YEAST	IDH1_YEAST	sp|P28834|IDH1_YEAST	sp|P28834|IDH1_YEAST	sp|P28834|IDH1_YEAST(89)-sp|P28834|IDH1_YEAST(110)	4	89	110	11350	4.52433	9288;	File: "Z:\alinden\DATA\2017\06_Jun\170619[Ridhima_TOMTIM]w and wo blocking protein\RAW\TOMTIM-\R_Gomkale_Linden_TOMTIM-_A10.raw"; ID: "9288"; scans: "11350"	452.313
no	DSS	339	1339	3040.73	0.00456	0	none	Z:\alinden\DATA\2017\06_Jun\170619[Ridhima_TOMTIM]w and wo blocking protein\RAW\TOMTIM-\R_Gomkale_Linden_TOMTIM-_A10.raw;	1	Intra	null	4.1e-08	LGSKGYFIKPTVFGDVK(4)-ILKYVDIGK(3):0	ALDH4_YEAST	ALDH4_YEAST	sp|P46367|ALDH4_YEAST	sp|P46367|ALDH4_YEAST	sp|P46367|ALDH4_YEAST(399)-sp|P46367|ALDH4_YEAST(377)	9	399	377	11354	7.38722	9291;	File: "Z:\alinden\DATA\2017\06_Jun\170619[Ridhima_TOMTIM]w and wo blocking protein\RAW\TOMTIM-\R_Gomkale_Linden_TOMTIM-_A10.raw"; ID: "9291"; scans: "11354"	1.49914
no	DSS	340	1340	3040.73	0.00263	0	none	Z:\alinden\DATA\2017\06_Jun\170619[Ridhima_TOMTIM]w and wo blocking protein\RAW\TOMTIM-\R_Gomkale_Linden_TOMTIM-_A10.raw;	1	Intra	null	3.61e-07	LGSKGYFIKPTVFGDVK(4)-ILKYVDIGK(3):0	ALDH4_YEAST	ALDH4_YEAST	sp|P46367|ALDH4_YEAST	sp|P46367|ALDH4_YEAST	sp|P46367|ALDH4_YEAST(399)-sp|P46367|ALDH4_YEAST(377)	9	399	377	11355	6.44249	9292;	File: "Z:\alinden\DATA\2017\06_Jun\170619[Ridhima_TOMTIM]w and wo blocking protein\RAW\TOMTIM-\R_Gomkale_Linden_TOMTIM-_A10.raw"; ID: "9292"; scans: "11355"	0.864638
no	DSS	341	1341	5513.75	1.01603	0	none	Z:\alinden\DATA\2017\06_Jun\170619[Ridhima_TOMTIM]w and wo blocking protein\RAW\TOMTIM-\R_Gomkale_Linden_TOMTIM-_A10.raw;	1	Intra	25,M(Oxidation[M]);	3.7e-13	AASESIKVGDPFDESTFQGAQTSQMQLNK(7)-ILKYVDIGKNEGATLITGGER(3):0	ALDH4_YEAST	ALDH4_YEAST	sp|P46367|ALDH4_YEAST	sp|P46367|ALDH4_YEAST	sp|P46367|ALDH4_YEAST(352)-sp|P46367|ALDH4_YEAST(377)	17	352	377	11364	12.4318	9301;	File: "Z:\alinden\DATA\2017\06_Jun\170619[Ridhima_TOMTIM]w and wo blocking protein\RAW\TOMTIM-\R_Gomkale_Linden_TOMTIM-_A10.raw"; ID: "9301"; scans: "11364"	184.204
no	DSS	342	1342	3885.06	0.00669	0	none	Z:\alinden\DATA\2017\06_Jun\170619[Ridhima_TOMTIM]w and wo blocking protein\RAW\TOMTIM-\R_Gomkale_Linden_TOMTIM-_A10.raw;	1	Intra	null	1.59e-11	YVDIGKNEGATLITGGER(6)-LGSKGYFIKPTVFGDVK(4):0	ALDH4_YEAST	ALDH4_YEAST	sp|P46367|ALDH4_YEAST	sp|P46367|ALDH4_YEAST	sp|P46367|ALDH4_YEAST(383)-sp|P46367|ALDH4_YEAST(399)	22	383	399	11393	10.7986	9328;	File: "Z:\alinden\DATA\2017\06_Jun\170619[Ridhima_TOMTIM]w and wo blocking protein\RAW\TOMTIM-\R_Gomkale_Linden_TOMTIM-_A10.raw"; ID: "9328"; scans: "11393"	1.72153
no	DSS	343	1343	3885.06	2.01002	0	none	Z:\alinden\DATA\2017\06_Jun\170619[Ridhima_TOMTIM]w and wo blocking protein\RAW\TOMTIM-\R_Gomkale_Linden_TOMTIM-_A10.raw;	1	Intra	null	1.91e-08	YVDIGKNEGATLITGGER(6)-LGSKGYFIKPTVFGDVK(4):0	ALDH4_YEAST	ALDH4_YEAST	sp|P46367|ALDH4_YEAST	sp|P46367|ALDH4_YEAST	sp|P46367|ALDH4_YEAST(383)-sp|P46367|ALDH4_YEAST(399)	22	383	399	11430	7.71897	9364;	File: "Z:\alinden\DATA\2017\06_Jun\170619[Ridhima_TOMTIM]w and wo blocking protein\RAW\TOMTIM-\R_Gomkale_Linden_TOMTIM-_A10.raw"; ID: "9364"; scans: "11430"	516.971
no	DSS	344	1344	3885.06	1.00373	0	none	Z:\alinden\DATA\2017\06_Jun\170619[Ridhima_TOMTIM]w and wo blocking protein\RAW\TOMTIM-\R_Gomkale_Linden_TOMTIM-_A10.raw;	1	Intra	null	1.3e-10	YVDIGKNEGATLITGGER(6)-LGSKGYFIKPTVFGDVK(4):0	ALDH4_YEAST	ALDH4_YEAST	sp|P46367|ALDH4_YEAST	sp|P46367|ALDH4_YEAST	sp|P46367|ALDH4_YEAST(383)-sp|P46367|ALDH4_YEAST(399)	22	383	399	11443	9.88606	9376;	File: "Z:\alinden\DATA\2017\06_Jun\170619[Ridhima_TOMTIM]w and wo blocking protein\RAW\TOMTIM-\R_Gomkale_Linden_TOMTIM-_A10.raw"; ID: "9376"; scans: "11443"	258.223
no	DSS	345	1345	4239.32	0.00649	0	none	Z:\alinden\DATA\2017\06_Jun\170619[Ridhima_TOMTIM]w and wo blocking protein\RAW\TOMTIM-\R_Gomkale_Linden_TOMTIM-_A10.raw;	1	Intra	null	4.67e-09	ILKYVDIGKNEGATLITGGER(3)-LGSKGYFIKPTVFGDVK(4):0	ALDH4_YEAST	ALDH4_YEAST	sp|P46367|ALDH4_YEAST	sp|P46367|ALDH4_YEAST	sp|P46367|ALDH4_YEAST(377)-sp|P46367|ALDH4_YEAST(399)	39	377	399	11452	8.33068	9384;	File: "Z:\alinden\DATA\2017\06_Jun\170619[Ridhima_TOMTIM]w and wo blocking protein\RAW\TOMTIM-\R_Gomkale_Linden_TOMTIM-_A10.raw"; ID: "9384"; scans: "11452"	1.53054
no	DSS	346	1346	4239.32	0.00509	0	none	Z:\alinden\DATA\2017\06_Jun\170619[Ridhima_TOMTIM]w and wo blocking protein\RAW\TOMTIM-\R_Gomkale_Linden_TOMTIM-_A10.raw;	1	Intra	null	8.44e-13	ILKYVDIGKNEGATLITGGER(3)-LGSKGYFIKPTVFGDVK(4):0	ALDH4_YEAST	ALDH4_YEAST	sp|P46367|ALDH4_YEAST	sp|P46367|ALDH4_YEAST	sp|P46367|ALDH4_YEAST(377)-sp|P46367|ALDH4_YEAST(399)	39	377	399	11471	12.0737	9402;	File: "Z:\alinden\DATA\2017\06_Jun\170619[Ridhima_TOMTIM]w and wo blocking protein\RAW\TOMTIM-\R_Gomkale_Linden_TOMTIM-_A10.raw"; ID: "9402"; scans: "11471"	1.20038
no	DSS	347	1347	4239.32	-0.00386	0	none	Z:\alinden\DATA\2017\06_Jun\170619[Ridhima_TOMTIM]w and wo blocking protein\RAW\TOMTIM-\R_Gomkale_Linden_TOMTIM-_A10.raw;	1	Intra	null	3e-16	ILKYVDIGKNEGATLITGGER(3)-LGSKGYFIKPTVFGDVK(4):0	ALDH4_YEAST	ALDH4_YEAST	sp|P46367|ALDH4_YEAST	sp|P46367|ALDH4_YEAST	sp|P46367|ALDH4_YEAST(377)-sp|P46367|ALDH4_YEAST(399)	39	377	399	11474	15.5229	9405;	File: "Z:\alinden\DATA\2017\06_Jun\170619[Ridhima_TOMTIM]w and wo blocking protein\RAW\TOMTIM-\R_Gomkale_Linden_TOMTIM-_A10.raw"; ID: "9405"; scans: "11474"	-0.910308
no	DSS	348	1348	4239.32	0.00362	0	none	Z:\alinden\DATA\2017\06_Jun\170619[Ridhima_TOMTIM]w and wo blocking protein\RAW\TOMTIM-\R_Gomkale_Linden_TOMTIM-_A10.raw;	1	Intra	null	6.53e-11	ILKYVDIGKNEGATLITGGER(3)-LGSKGYFIKPTVFGDVK(4):0	ALDH4_YEAST	ALDH4_YEAST	sp|P46367|ALDH4_YEAST	sp|P46367|ALDH4_YEAST	sp|P46367|ALDH4_YEAST(377)-sp|P46367|ALDH4_YEAST(399)	39	377	399	11503	10.1851	9433;	File: "Z:\alinden\DATA\2017\06_Jun\170619[Ridhima_TOMTIM]w and wo blocking protein\RAW\TOMTIM-\R_Gomkale_Linden_TOMTIM-_A10.raw"; ID: "9433"; scans: "11503"	0.853707
no	DSS	349	1349	4299.16	1.00036	0	none	Z:\alinden\DATA\2017\06_Jun\170619[Ridhima_TOMTIM]w and wo blocking protein\RAW\TOMTIM-\R_Gomkale_Linden_TOMTIM-_A10.raw;	1	Intra	null	8.55e-07	AASESIKVGDPFDESTFQGAQTSQMQLNK(7)-ILKYVDIGK(3):0	ALDH4_YEAST	ALDH4_YEAST	sp|P46367|ALDH4_YEAST	sp|P46367|ALDH4_YEAST	sp|P46367|ALDH4_YEAST(352)-sp|P46367|ALDH4_YEAST(377)	17	352	377	11529	6.06803	9457;	File: "Z:\alinden\DATA\2017\06_Jun\170619[Ridhima_TOMTIM]w and wo blocking protein\RAW\TOMTIM-\R_Gomkale_Linden_TOMTIM-_A10.raw"; ID: "9457"; scans: "11529"	232.579
no	DSS	350	1350	5143.49	2.00765	0	none	Z:\alinden\DATA\2017\06_Jun\170619[Ridhima_TOMTIM]w and wo blocking protein\RAW\TOMTIM-\R_Gomkale_Linden_TOMTIM-_A10.raw;	1	Intra	null	7.74e-16	AASESIKVGDPFDESTFQGAQTSQMQLNK(7)-YVDIGKNEGATLITGGER(6):0	ALDH4_YEAST	ALDH4_YEAST	sp|P46367|ALDH4_YEAST	sp|P46367|ALDH4_YEAST	sp|P46367|ALDH4_YEAST(352)-sp|P46367|ALDH4_YEAST(383)	4	352	383	11530	15.1113	9458;	File: "Z:\alinden\DATA\2017\06_Jun\170619[Ridhima_TOMTIM]w and wo blocking protein\RAW\TOMTIM-\R_Gomkale_Linden_TOMTIM-_A10.raw"; ID: "9458"; scans: "11530"	390.099
no	DSS	351	1351	3625.84	0.01081	0	none	Z:\alinden\DATA\2017\06_Jun\170619[Ridhima_TOMTIM]w and wo blocking protein\RAW\TOMTIM-\R_Gomkale_Linden_TOMTIM-_A10.raw;	1	Intra	null	2.27e-08	VGDPFDESTFQGAQTSQMQLNKILK(22)-GKALYR(2):0	ALDH4_YEAST	ALDH4_YEAST	sp|P46367|ALDH4_YEAST	sp|P46367|ALDH4_YEAST	sp|P46367|ALDH4_YEAST(374)-sp|P46367|ALDH4_YEAST(110)	4	374	110	11560	7.64397	9487;	File: "Z:\alinden\DATA\2017\06_Jun\170619[Ridhima_TOMTIM]w and wo blocking protein\RAW\TOMTIM-\R_Gomkale_Linden_TOMTIM-_A10.raw"; ID: "9487"; scans: "11560"	2.98054
no	DSS	352	1352	3625.84	-0.0105	0	none	Z:\alinden\DATA\2017\06_Jun\170619[Ridhima_TOMTIM]w and wo blocking protein\RAW\TOMTIM-\R_Gomkale_Linden_TOMTIM-_A10.raw;	1	Intra	null	0.000131	VGDPFDESTFQGAQTSQMQLNKILK(22)-GKALYR(2):0	ALDH4_YEAST	ALDH4_YEAST	sp|P46367|ALDH4_YEAST	sp|P46367|ALDH4_YEAST	sp|P46367|ALDH4_YEAST(374)-sp|P46367|ALDH4_YEAST(110)	4	374	110	11566	3.88273	9492;	File: "Z:\alinden\DATA\2017\06_Jun\170619[Ridhima_TOMTIM]w and wo blocking protein\RAW\TOMTIM-\R_Gomkale_Linden_TOMTIM-_A10.raw"; ID: "9492"; scans: "11566"	-2.89508
no	DSS	353	1353	4239.32	-0.01543	0	none	Z:\alinden\DATA\2017\06_Jun\170619[Ridhima_TOMTIM]w and wo blocking protein\RAW\TOMTIM-\R_Gomkale_Linden_TOMTIM-_A10.raw;	1	Intra	null	4.26e-15	ILKYVDIGKNEGATLITGGER(3)-LGSKGYFIKPTVFGDVK(4):0	ALDH4_YEAST	ALDH4_YEAST	sp|P46367|ALDH4_YEAST	sp|P46367|ALDH4_YEAST	sp|P46367|ALDH4_YEAST(377)-sp|P46367|ALDH4_YEAST(399)	39	377	399	11599	14.3706	9523;	File: "Z:\alinden\DATA\2017\06_Jun\170619[Ridhima_TOMTIM]w and wo blocking protein\RAW\TOMTIM-\R_Gomkale_Linden_TOMTIM-_A10.raw"; ID: "9523"; scans: "11599"	-3.63888
no	DSS	354	1354	3312.89	0.98675	0	none	Z:\alinden\DATA\2017\06_Jun\170619[Ridhima_TOMTIM]w and wo blocking protein\RAW\TOMTIM-\R_Gomkale_Linden_TOMTIM-_A10.raw;	1	Inter	null	1.3e-11	NLVALKGPLATPIGKGHR(15)-ANIMKLGDGLFR(5):0	IDH2_YEAST	IDH1_YEAST	sp|P28241|IDH2_YEAST	sp|P28834|IDH1_YEAST	sp|P28241|IDH2_YEAST(109)-sp|P28834|IDH1_YEAST(199)	7	109	199	11606	10.8861	9530;	File: "Z:\alinden\DATA\2017\06_Jun\170619[Ridhima_TOMTIM]w and wo blocking protein\RAW\TOMTIM-\R_Gomkale_Linden_TOMTIM-_A10.raw"; ID: "9530"; scans: "11606"	297.673
no	DSS	355	1355	4239.32	0.98824	0	none	Z:\alinden\DATA\2017\06_Jun\170619[Ridhima_TOMTIM]w and wo blocking protein\RAW\TOMTIM-\R_Gomkale_Linden_TOMTIM-_A10.raw;	1	Intra	null	9.92e-09	ILKYVDIGKNEGATLITGGER(3)-LGSKGYFIKPTVFGDVK(4):0	ALDH4_YEAST	ALDH4_YEAST	sp|P46367|ALDH4_YEAST	sp|P46367|ALDH4_YEAST	sp|P46367|ALDH4_YEAST(377)-sp|P46367|ALDH4_YEAST(399)	39	377	399	11615	8.00349	9539;	File: "Z:\alinden\DATA\2017\06_Jun\170619[Ridhima_TOMTIM]w and wo blocking protein\RAW\TOMTIM-\R_Gomkale_Linden_TOMTIM-_A10.raw"; ID: "9539"; scans: "11615"	233.003
no	DSS	356	1356	3647.92	0.97616	0	none	Z:\alinden\DATA\2017\06_Jun\170619[Ridhima_TOMTIM]w and wo blocking protein\RAW\TOMTIM-\R_Gomkale_Linden_TOMTIM-_A10.raw;	1	Intra	null	6.85e-12	QTDHKEGVYEAVESLKR(5)-KQLDIYANVALFK(1):0	IDH1_YEAST	IDH1_YEAST	sp|P28834|IDH1_YEAST	sp|P28834|IDH1_YEAST	sp|P28834|IDH1_YEAST(71)-sp|P28834|IDH1_YEAST(110)	12	71	110	11623	11.1643	9546;	File: "Z:\alinden\DATA\2017\06_Jun\170619[Ridhima_TOMTIM]w and wo blocking protein\RAW\TOMTIM-\R_Gomkale_Linden_TOMTIM-_A10.raw"; ID: "9546"; scans: "11623"	267.448
no	DSS	357	1357	3647.92	-0.01001	0	none	Z:\alinden\DATA\2017\06_Jun\170619[Ridhima_TOMTIM]w and wo blocking protein\RAW\TOMTIM-\R_Gomkale_Linden_TOMTIM-_A10.raw;	1	Intra	null	5.2e-08	QTDHKEGVYEAVESLKR(5)-KQLDIYANVALFK(1):0	IDH1_YEAST	IDH1_YEAST	sp|P28834|IDH1_YEAST	sp|P28834|IDH1_YEAST	sp|P28834|IDH1_YEAST(71)-sp|P28834|IDH1_YEAST(110)	12	71	110	11663	7.284	9584;	File: "Z:\alinden\DATA\2017\06_Jun\170619[Ridhima_TOMTIM]w and wo blocking protein\RAW\TOMTIM-\R_Gomkale_Linden_TOMTIM-_A10.raw"; ID: "9584"; scans: "11663"	-2.74328
no	DSS	358	1358	3312.89	0.98956	0	none	Z:\alinden\DATA\2017\06_Jun\170619[Ridhima_TOMTIM]w and wo blocking protein\RAW\TOMTIM-\R_Gomkale_Linden_TOMTIM-_A10.raw;	1	Inter	null	0.00162	NLVALKGPLATPIGKGHR(15)-ANIMKLGDGLFR(5):0	IDH2_YEAST	IDH1_YEAST	sp|P28241|IDH2_YEAST	sp|P28834|IDH1_YEAST	sp|P28241|IDH2_YEAST(109)-sp|P28834|IDH1_YEAST(199)	7	109	199	11665	2.79048	9586;	File: "Z:\alinden\DATA\2017\06_Jun\170619[Ridhima_TOMTIM]w and wo blocking protein\RAW\TOMTIM-\R_Gomkale_Linden_TOMTIM-_A10.raw"; ID: "9586"; scans: "11665"	298.52
no	DSS	359	1359	3647.92	1.99382	0	none	Z:\alinden\DATA\2017\06_Jun\170619[Ridhima_TOMTIM]w and wo blocking protein\RAW\TOMTIM-\R_Gomkale_Linden_TOMTIM-_A10.raw;	1	Intra	null	8.2e-14	QTDHKEGVYEAVESLKR(5)-KQLDIYANVALFK(1):0	IDH1_YEAST	IDH1_YEAST	sp|P28834|IDH1_YEAST	sp|P28834|IDH1_YEAST	sp|P28834|IDH1_YEAST(71)-sp|P28834|IDH1_YEAST(110)	12	71	110	11696	13.0862	9615;	File: "Z:\alinden\DATA\2017\06_Jun\170619[Ridhima_TOMTIM]w and wo blocking protein\RAW\TOMTIM-\R_Gomkale_Linden_TOMTIM-_A10.raw"; ID: "9615"; scans: "11696"	546.114
no	DSS	360	1360	3647.92	2.99249	0	none	Z:\alinden\DATA\2017\06_Jun\170619[Ridhima_TOMTIM]w and wo blocking protein\RAW\TOMTIM-\R_Gomkale_Linden_TOMTIM-_A10.raw;	1	Intra	null	4.48e-06	QTDHKEGVYEAVESLKR(5)-KQLDIYANVALFK(1):0	IDH1_YEAST	IDH1_YEAST	sp|P28834|IDH1_YEAST	sp|P28834|IDH1_YEAST	sp|P28834|IDH1_YEAST(71)-sp|P28834|IDH1_YEAST(110)	12	71	110	11747	5.34872	9663;	File: "Z:\alinden\DATA\2017\06_Jun\170619[Ridhima_TOMTIM]w and wo blocking protein\RAW\TOMTIM-\R_Gomkale_Linden_TOMTIM-_A10.raw"; ID: "9663"; scans: "11747"	819.429
no	DSS	361	1361	3647.92	0.98669	0	none	Z:\alinden\DATA\2017\06_Jun\170619[Ridhima_TOMTIM]w and wo blocking protein\RAW\TOMTIM-\R_Gomkale_Linden_TOMTIM-_A10.raw;	1	Intra	null	7.8e-06	QTDHKEGVYEAVESLKR(5)-KQLDIYANVALFK(1):0	IDH1_YEAST	IDH1_YEAST	sp|P28834|IDH1_YEAST	sp|P28834|IDH1_YEAST	sp|P28834|IDH1_YEAST(71)-sp|P28834|IDH1_YEAST(110)	12	71	110	11798	5.10791	9711;	File: "Z:\alinden\DATA\2017\06_Jun\170619[Ridhima_TOMTIM]w and wo blocking protein\RAW\TOMTIM-\R_Gomkale_Linden_TOMTIM-_A10.raw"; ID: "9711"; scans: "11798"	270.332
no	DSS	362	1362	5497.76	3.98849	0	none	Z:\alinden\DATA\2017\06_Jun\170619[Ridhima_TOMTIM]w and wo blocking protein\RAW\TOMTIM-\R_Gomkale_Linden_TOMTIM-_A10.raw;	1	Intra	null	6.62e-11	AASESIKVGDPFDESTFQGAQTSQMQLNK(7)-ILKYVDIGKNEGATLITGGER(3):0	ALDH4_YEAST	ALDH4_YEAST	sp|P46367|ALDH4_YEAST	sp|P46367|ALDH4_YEAST	sp|P46367|ALDH4_YEAST(352)-sp|P46367|ALDH4_YEAST(377)	17	352	377	11799	10.1791	9712;	File: "Z:\alinden\DATA\2017\06_Jun\170619[Ridhima_TOMTIM]w and wo blocking protein\RAW\TOMTIM-\R_Gomkale_Linden_TOMTIM-_A10.raw"; ID: "9712"; scans: "11799"	724.817
no	DSS	363	1363	5497.76	1.98041	0	none	Z:\alinden\DATA\2017\06_Jun\170619[Ridhima_TOMTIM]w and wo blocking protein\RAW\TOMTIM-\R_Gomkale_Linden_TOMTIM-_A10.raw;	1	Intra	null	3.75e-29	AASESIKVGDPFDESTFQGAQTSQMQLNK(7)-ILKYVDIGKNEGATLITGGER(3):0	ALDH4_YEAST	ALDH4_YEAST	sp|P46367|ALDH4_YEAST	sp|P46367|ALDH4_YEAST	sp|P46367|ALDH4_YEAST(352)-sp|P46367|ALDH4_YEAST(377)	17	352	377	11836	28.426	9747;	File: "Z:\alinden\DATA\2017\06_Jun\170619[Ridhima_TOMTIM]w and wo blocking protein\RAW\TOMTIM-\R_Gomkale_Linden_TOMTIM-_A10.raw"; ID: "9747"; scans: "11836"	360.026
no	DSS	364	1364	5122.55	1.99595	0	none	Z:\alinden\DATA\2017\06_Jun\170619[Ridhima_TOMTIM]w and wo blocking protein\RAW\TOMTIM-\R_Gomkale_Linden_TOMTIM-_A10.raw;	1	Intra	25,M(Oxidation[M]);	0.00128	AASESIKVGDPFDESTFQGAQTSQMQLNK(7)-LGSKGYFIKPTVFGDVK(4):0	ALDH4_YEAST	ALDH4_YEAST	sp|P46367|ALDH4_YEAST	sp|P46367|ALDH4_YEAST	sp|P46367|ALDH4_YEAST(352)-sp|P46367|ALDH4_YEAST(399)	18	352	399	11840	2.89279	9751;	File: "Z:\alinden\DATA\2017\06_Jun\170619[Ridhima_TOMTIM]w and wo blocking protein\RAW\TOMTIM-\R_Gomkale_Linden_TOMTIM-_A10.raw"; ID: "9751"; scans: "11840"	389.412
no	DSS	365	1365	4272.09	-0.01153	0	none	Z:\alinden\DATA\2017\06_Jun\170619[Ridhima_TOMTIM]w and wo blocking protein\RAW\TOMTIM-\R_Gomkale_Linden_TOMTIM-_A10.raw;	1	Intra	null	0.000227	SADEVINMANDSEYGLAAGIHTSNINTALKVADR(30)-AKLDE(2):0	ALDH4_YEAST	ALDH4_YEAST	sp|P46367|ALDH4_YEAST	sp|P46367|ALDH4_YEAST	sp|P46367|ALDH4_YEAST(463)-sp|P46367|ALDH4_YEAST(516)	3	463	516	11846	3.64397	9756;	File: "Z:\alinden\DATA\2017\06_Jun\170619[Ridhima_TOMTIM]w and wo blocking protein\RAW\TOMTIM-\R_Gomkale_Linden_TOMTIM-_A10.raw"; ID: "9756"; scans: "11846"	-2.69829
no	DSS	366	1366	3597.86	-0.01688	0	none	Z:\alinden\DATA\2017\06_Jun\170619[Ridhima_TOMTIM]w and wo blocking protein\RAW\TOMTIM-\R_Gomkale_Linden_TOMTIM-_A10.raw;	1	Inter	null	4e-05	LQFALPHETLYSGSEVTQVNLPAKSGR(24)-SAWR(1):0	ATPD_YEAST	ATP5E_YEAST	sp|Q12165|ATPD_YEAST	sp|P21306|ATP5E_YEAST	sp|Q12165|ATPD_YEAST(57)-sp|P21306|ATP5E_YEAST(2)	3	57	2	11849	4.39794	9759;	File: "Z:\alinden\DATA\2017\06_Jun\170619[Ridhima_TOMTIM]w and wo blocking protein\RAW\TOMTIM-\R_Gomkale_Linden_TOMTIM-_A10.raw"; ID: "9759"; scans: "11849"	-4.69039
no	DSS	367	1367	4114.06	-0.0297	0	none	Z:\alinden\DATA\2017\06_Jun\170619[Ridhima_TOMTIM]w and wo blocking protein\RAW\TOMTIM-\R_Gomkale_Linden_TOMTIM-_A10.raw;	1	Intra	null	1.68e-07	APMLTTDNLKASLVYHDGSFNDSR(10)-SYLLSKSATVEK(6):0	GPDM_YEAST	GPDM_YEAST	sp|P32191|GPDM_YEAST	sp|P32191|GPDM_YEAST	sp|P32191|GPDM_YEAST(211)-sp|P32191|GPDM_YEAST(195)	4	211	195	11906	6.77469	9813;	File: "Z:\alinden\DATA\2017\06_Jun\170619[Ridhima_TOMTIM]w and wo blocking protein\RAW\TOMTIM-\R_Gomkale_Linden_TOMTIM-_A10.raw"; ID: "9813"; scans: "11906"	-7.21744
no	DSS	368	1368	4114.06	1.99357	0	none	Z:\alinden\DATA\2017\06_Jun\170619[Ridhima_TOMTIM]w and wo blocking protein\RAW\TOMTIM-\R_Gomkale_Linden_TOMTIM-_A10.raw;	1	Intra	null	6.07e-07	APMLTTDNLKASLVYHDGSFNDSR(10)-SYLLSKSATVEK(6):0	GPDM_YEAST	GPDM_YEAST	sp|P32191|GPDM_YEAST	sp|P32191|GPDM_YEAST	sp|P32191|GPDM_YEAST(211)-sp|P32191|GPDM_YEAST(195)	4	211	195	11916	6.21681	9823;	File: "Z:\alinden\DATA\2017\06_Jun\170619[Ridhima_TOMTIM]w and wo blocking protein\RAW\TOMTIM-\R_Gomkale_Linden_TOMTIM-_A10.raw"; ID: "9823"; scans: "11916"	484.222
no	DSS	369	1369	4001.2	1.02452	1	none	Z:\alinden\DATA\2017\06_Jun\170619[Ridhima_TOMTIM]w and wo blocking protein\RAW\TOMTIM-\R_Gomkale_Linden_TOMTIM-_A10.raw;	1	Intra	3,M(Oxidation[M]);	1.32e-06	EDMRIVKEEIFGPVVTVTK(7)-IVKEEIFGPVVTVTK(3):0	ALDH4_YEAST	ALDH4_YEAST	sp|P46367|ALDH4_YEAST	sp|P46367|ALDH4_YEAST	sp|P46367|ALDH4_YEAST(419)-sp|P46367|ALDH4_YEAST(419)	1	419	419	11949	5.87943	9854;	File: "Z:\alinden\DATA\2017\06_Jun\170619[Ridhima_TOMTIM]w and wo blocking protein\RAW\TOMTIM-\R_Gomkale_Linden_TOMTIM-_A10.raw"; ID: "9854"; scans: "11949"	255.923
no	DSS	370	1370	3980.94	1.00351	0	none	Z:\alinden\DATA\2017\06_Jun\170619[Ridhima_TOMTIM]w and wo blocking protein\RAW\TOMTIM-\R_Gomkale_Linden_TOMTIM-_A10b.raw;	1	Intra	null	2.05e-05	TETDAFGEIHVPADKYWGAQTQR(15)-SFQNFKIGGAR(6):0	FUMH_YEAST	FUMH_YEAST	sp|P08417|FUMH_YEAST	sp|P08417|FUMH_YEAST	sp|P08417|FUMH_YEAST(44)-sp|P08417|FUMH_YEAST(58)	15	44	58	12031	4.68825	10041;	File: "Z:\alinden\DATA\2017\06_Jun\170619[Ridhima_TOMTIM]w and wo blocking protein\RAW\TOMTIM-\R_Gomkale_Linden_TOMTIM-_A10b.raw"; ID: "10041"; scans: "12031"	251.951
no	DSS	371	1371	3980.94	1.00824	0	none	Z:\alinden\DATA\2017\06_Jun\170619[Ridhima_TOMTIM]w and wo blocking protein\RAW\TOMTIM-\R_Gomkale_Linden_TOMTIM-_A10b.raw;	1	Intra	null	2.62e-09	TETDAFGEIHVPADKYWGAQTQR(15)-SFQNFKIGGAR(6):0	FUMH_YEAST	FUMH_YEAST	sp|P08417|FUMH_YEAST	sp|P08417|FUMH_YEAST	sp|P08417|FUMH_YEAST(44)-sp|P08417|FUMH_YEAST(58)	15	44	58	12062	8.5817	10071;	File: "Z:\alinden\DATA\2017\06_Jun\170619[Ridhima_TOMTIM]w and wo blocking protein\RAW\TOMTIM-\R_Gomkale_Linden_TOMTIM-_A10b.raw"; ID: "10071"; scans: "12062"	253.138
no	DSS	372	1372	5439.68	1.9587	0	none	Z:\alinden\DATA\2017\06_Jun\170619[Ridhima_TOMTIM]w and wo blocking protein\RAW\TOMTIM-\R_Gomkale_Linden_TOMTIM-_A10b.raw;	1	Intra	10,M(Oxidation[M]);	9.07e-14	FKSADEVINMANDSEYGLAAGIHTSNINTALK(2)-YVDIGKNEGATLITGGER(6):0	ALDH4_YEAST	ALDH4_YEAST	sp|P46367|ALDH4_YEAST	sp|P46367|ALDH4_YEAST	sp|P46367|ALDH4_YEAST(433)-sp|P46367|ALDH4_YEAST(383)	10	433	383	12075	13.0424	10083;	File: "Z:\alinden\DATA\2017\06_Jun\170619[Ridhima_TOMTIM]w and wo blocking protein\RAW\TOMTIM-\R_Gomkale_Linden_TOMTIM-_A10b.raw"; ID: "10083"; scans: "12075"	359.88
no	DSS	373	1373	4038.16	0.01677	0	none	Z:\alinden\DATA\2017\06_Jun\170619[Ridhima_TOMTIM]w and wo blocking protein\RAW\TOMTIM-\R_Gomkale_Linden_TOMTIM-_A10b.raw;	1	Inter	null	0.00126	VKEAHELIPLFKNGQYLGWSGFTGVGTPK(2)-EKINPK(2):0	ACH1_YEAST	TCB3_YEAST	sp|P32316|ACH1_YEAST	sp|Q03640|TCB3_YEAST	sp|P32316|ACH1_YEAST(21)-sp|Q03640|TCB3_YEAST(370)	1	21	370	12154	2.89963	10158;	File: "Z:\alinden\DATA\2017\06_Jun\170619[Ridhima_TOMTIM]w and wo blocking protein\RAW\TOMTIM-\R_Gomkale_Linden_TOMTIM-_A10b.raw"; ID: "10158"; scans: "12154"	4.15183
no	DSS	374	1374	3885.06	0.00401	0	none	Z:\alinden\DATA\2017\06_Jun\170619[Ridhima_TOMTIM]w and wo blocking protein\RAW\TOMTIM-\R_Gomkale_Linden_TOMTIM-_A10b.raw;	1	Intra	null	3.45e-13	YVDIGKNEGATLITGGER(6)-LGSKGYFIKPTVFGDVK(4):0	ALDH4_YEAST	ALDH4_YEAST	sp|P46367|ALDH4_YEAST	sp|P46367|ALDH4_YEAST	sp|P46367|ALDH4_YEAST(383)-sp|P46367|ALDH4_YEAST(399)	22	383	399	12158	12.4622	10161;	File: "Z:\alinden\DATA\2017\06_Jun\170619[Ridhima_TOMTIM]w and wo blocking protein\RAW\TOMTIM-\R_Gomkale_Linden_TOMTIM-_A10b.raw"; ID: "10161"; scans: "12158"	1.03189
no	DSS	375	1375	3885.06	0.00197	0	none	Z:\alinden\DATA\2017\06_Jun\170619[Ridhima_TOMTIM]w and wo blocking protein\RAW\TOMTIM-\R_Gomkale_Linden_TOMTIM-_A10b.raw;	1	Intra	null	1.88e-08	YVDIGKNEGATLITGGER(6)-LGSKGYFIKPTVFGDVK(4):0	ALDH4_YEAST	ALDH4_YEAST	sp|P46367|ALDH4_YEAST	sp|P46367|ALDH4_YEAST	sp|P46367|ALDH4_YEAST(383)-sp|P46367|ALDH4_YEAST(399)	22	383	399	12159	7.72584	10162;	File: "Z:\alinden\DATA\2017\06_Jun\170619[Ridhima_TOMTIM]w and wo blocking protein\RAW\TOMTIM-\R_Gomkale_Linden_TOMTIM-_A10b.raw"; ID: "10162"; scans: "12159"	0.506939
no	DSS	376	1376	3459.78	-0.00097	0	none	Z:\alinden\DATA\2017\06_Jun\170619[Ridhima_TOMTIM]w and wo blocking protein\RAW\TOMTIM-\R_Gomkale_Linden_TOMTIM-_A10b.raw;	1	Intra	null	9.04e-10	QTDHKEGVYEAVESLKR(5)-ANIMKLGDGLFR(5):0	IDH1_YEAST	IDH1_YEAST	sp|P28834|IDH1_YEAST	sp|P28834|IDH1_YEAST	sp|P28834|IDH1_YEAST(71)-sp|P28834|IDH1_YEAST(199)	6	71	199	12162	9.04383	10165;	File: "Z:\alinden\DATA\2017\06_Jun\170619[Ridhima_TOMTIM]w and wo blocking protein\RAW\TOMTIM-\R_Gomkale_Linden_TOMTIM-_A10b.raw"; ID: "10165"; scans: "12162"	-0.280283
no	DSS	377	1377	3885.06	-0.00079	0	none	Z:\alinden\DATA\2017\06_Jun\170619[Ridhima_TOMTIM]w and wo blocking protein\RAW\TOMTIM-\R_Gomkale_Linden_TOMTIM-_A10b.raw;	1	Intra	null	7.82e-14	YVDIGKNEGATLITGGER(6)-LGSKGYFIKPTVFGDVK(4):0	ALDH4_YEAST	ALDH4_YEAST	sp|P46367|ALDH4_YEAST	sp|P46367|ALDH4_YEAST	sp|P46367|ALDH4_YEAST(383)-sp|P46367|ALDH4_YEAST(399)	22	383	399	12196	13.1068	10197;	File: "Z:\alinden\DATA\2017\06_Jun\170619[Ridhima_TOMTIM]w and wo blocking protein\RAW\TOMTIM-\R_Gomkale_Linden_TOMTIM-_A10b.raw"; ID: "10197"; scans: "12196"	-0.203291
no	DSS	378	1378	5513.75	1.01728	0	none	Z:\alinden\DATA\2017\06_Jun\170619[Ridhima_TOMTIM]w and wo blocking protein\RAW\TOMTIM-\R_Gomkale_Linden_TOMTIM-_A10b.raw;	1	Intra	25,M(Oxidation[M]);	3.36e-12	AASESIKVGDPFDESTFQGAQTSQMQLNK(7)-ILKYVDIGKNEGATLITGGER(3):0	ALDH4_YEAST	ALDH4_YEAST	sp|P46367|ALDH4_YEAST	sp|P46367|ALDH4_YEAST	sp|P46367|ALDH4_YEAST(352)-sp|P46367|ALDH4_YEAST(377)	17	352	377	12205	11.4737	10206;	File: "Z:\alinden\DATA\2017\06_Jun\170619[Ridhima_TOMTIM]w and wo blocking protein\RAW\TOMTIM-\R_Gomkale_Linden_TOMTIM-_A10b.raw"; ID: "10206"; scans: "12205"	184.431
no	DSS	379	1379	3040.73	-0.00102	0	none	Z:\alinden\DATA\2017\06_Jun\170619[Ridhima_TOMTIM]w and wo blocking protein\RAW\TOMTIM-\R_Gomkale_Linden_TOMTIM-_A10b.raw;	1	Intra	null	3.77e-08	LGSKGYFIKPTVFGDVK(4)-ILKYVDIGK(3):0	ALDH4_YEAST	ALDH4_YEAST	sp|P46367|ALDH4_YEAST	sp|P46367|ALDH4_YEAST	sp|P46367|ALDH4_YEAST(399)-sp|P46367|ALDH4_YEAST(377)	9	399	377	12217	7.42366	10217;	File: "Z:\alinden\DATA\2017\06_Jun\170619[Ridhima_TOMTIM]w and wo blocking protein\RAW\TOMTIM-\R_Gomkale_Linden_TOMTIM-_A10b.raw"; ID: "10217"; scans: "12217"	-0.335335
no	DSS	380	1380	5513.75	-0.02478	0	none	Z:\alinden\DATA\2017\06_Jun\170619[Ridhima_TOMTIM]w and wo blocking protein\RAW\TOMTIM-\R_Gomkale_Linden_TOMTIM-_A10b.raw;	1	Intra	25,M(Oxidation[M]);	4.59e-09	AASESIKVGDPFDESTFQGAQTSQMQLNK(7)-ILKYVDIGKNEGATLITGGER(3):0	ALDH4_YEAST	ALDH4_YEAST	sp|P46367|ALDH4_YEAST	sp|P46367|ALDH4_YEAST	sp|P46367|ALDH4_YEAST(352)-sp|P46367|ALDH4_YEAST(377)	17	352	377	12232	8.33819	10232;	File: "Z:\alinden\DATA\2017\06_Jun\170619[Ridhima_TOMTIM]w and wo blocking protein\RAW\TOMTIM-\R_Gomkale_Linden_TOMTIM-_A10b.raw"; ID: "10232"; scans: "12232"	-4.49342
no	DSS	381	1381	3040.73	-0.00204	0	none	Z:\alinden\DATA\2017\06_Jun\170619[Ridhima_TOMTIM]w and wo blocking protein\RAW\TOMTIM-\R_Gomkale_Linden_TOMTIM-_A10b.raw;	1	Intra	null	3.69e-10	LGSKGYFIKPTVFGDVK(4)-ILKYVDIGK(3):0	ALDH4_YEAST	ALDH4_YEAST	sp|P46367|ALDH4_YEAST	sp|P46367|ALDH4_YEAST	sp|P46367|ALDH4_YEAST(399)-sp|P46367|ALDH4_YEAST(377)	9	399	377	12252	9.43297	10251;	File: "Z:\alinden\DATA\2017\06_Jun\170619[Ridhima_TOMTIM]w and wo blocking protein\RAW\TOMTIM-\R_Gomkale_Linden_TOMTIM-_A10b.raw"; ID: "10251"; scans: "12252"	-0.670671
no	DSS	382	1382	3040.73	-0.00324	0	none	Z:\alinden\DATA\2017\06_Jun\170619[Ridhima_TOMTIM]w and wo blocking protein\RAW\TOMTIM-\R_Gomkale_Linden_TOMTIM-_A10b.raw;	1	Intra	null	1.25e-09	LGSKGYFIKPTVFGDVK(4)-ILKYVDIGK(3):0	ALDH4_YEAST	ALDH4_YEAST	sp|P46367|ALDH4_YEAST	sp|P46367|ALDH4_YEAST	sp|P46367|ALDH4_YEAST(399)-sp|P46367|ALDH4_YEAST(377)	9	399	377	12257	8.90309	10255;	File: "Z:\alinden\DATA\2017\06_Jun\170619[Ridhima_TOMTIM]w and wo blocking protein\RAW\TOMTIM-\R_Gomkale_Linden_TOMTIM-_A10b.raw"; ID: "10255"; scans: "12257"	-1.06518
no	DSS	383	1383	3885.06	1.00592	0	none	Z:\alinden\DATA\2017\06_Jun\170619[Ridhima_TOMTIM]w and wo blocking protein\RAW\TOMTIM-\R_Gomkale_Linden_TOMTIM-_A10b.raw;	1	Intra	null	1.48e-11	YVDIGKNEGATLITGGER(6)-LGSKGYFIKPTVFGDVK(4):0	ALDH4_YEAST	ALDH4_YEAST	sp|P46367|ALDH4_YEAST	sp|P46367|ALDH4_YEAST	sp|P46367|ALDH4_YEAST(383)-sp|P46367|ALDH4_YEAST(399)	22	383	399	12333	10.8297	10327;	File: "Z:\alinden\DATA\2017\06_Jun\170619[Ridhima_TOMTIM]w and wo blocking protein\RAW\TOMTIM-\R_Gomkale_Linden_TOMTIM-_A10b.raw"; ID: "10327"; scans: "12333"	258.786
no	DSS	384	1384	4239.32	-0.00116	0	none	Z:\alinden\DATA\2017\06_Jun\170619[Ridhima_TOMTIM]w and wo blocking protein\RAW\TOMTIM-\R_Gomkale_Linden_TOMTIM-_A10b.raw;	1	Intra	null	1.21e-12	ILKYVDIGKNEGATLITGGER(3)-LGSKGYFIKPTVFGDVK(4):0	ALDH4_YEAST	ALDH4_YEAST	sp|P46367|ALDH4_YEAST	sp|P46367|ALDH4_YEAST	sp|P46367|ALDH4_YEAST(377)-sp|P46367|ALDH4_YEAST(399)	39	377	399	12339	11.9172	10332;	File: "Z:\alinden\DATA\2017\06_Jun\170619[Ridhima_TOMTIM]w and wo blocking protein\RAW\TOMTIM-\R_Gomkale_Linden_TOMTIM-_A10b.raw"; ID: "10332"; scans: "12339"	-0.273564
no	DSS	385	1385	4239.32	0.00021	0	none	Z:\alinden\DATA\2017\06_Jun\170619[Ridhima_TOMTIM]w and wo blocking protein\RAW\TOMTIM-\R_Gomkale_Linden_TOMTIM-_A10b.raw;	1	Intra	null	9.18e-14	ILKYVDIGKNEGATLITGGER(3)-LGSKGYFIKPTVFGDVK(4):0	ALDH4_YEAST	ALDH4_YEAST	sp|P46367|ALDH4_YEAST	sp|P46367|ALDH4_YEAST	sp|P46367|ALDH4_YEAST(377)-sp|P46367|ALDH4_YEAST(399)	39	377	399	12341	13.0372	10334;	File: "Z:\alinden\DATA\2017\06_Jun\170619[Ridhima_TOMTIM]w and wo blocking protein\RAW\TOMTIM-\R_Gomkale_Linden_TOMTIM-_A10b.raw"; ID: "10334"; scans: "12341"	0.049524
no	DSS	386	1386	4239.32	-0.00262	0	none	Z:\alinden\DATA\2017\06_Jun\170619[Ridhima_TOMTIM]w and wo blocking protein\RAW\TOMTIM-\R_Gomkale_Linden_TOMTIM-_A10b.raw;	1	Intra	null	1.4e-08	ILKYVDIGKNEGATLITGGER(3)-LGSKGYFIKPTVFGDVK(4):0	ALDH4_YEAST	ALDH4_YEAST	sp|P46367|ALDH4_YEAST	sp|P46367|ALDH4_YEAST	sp|P46367|ALDH4_YEAST(377)-sp|P46367|ALDH4_YEAST(399)	39	377	399	12344	7.85387	10337;	File: "Z:\alinden\DATA\2017\06_Jun\170619[Ridhima_TOMTIM]w and wo blocking protein\RAW\TOMTIM-\R_Gomkale_Linden_TOMTIM-_A10b.raw"; ID: "10337"; scans: "12344"	-0.617877
no	DSS	387	1387	4239.32	-0.00608	0	none	Z:\alinden\DATA\2017\06_Jun\170619[Ridhima_TOMTIM]w and wo blocking protein\RAW\TOMTIM-\R_Gomkale_Linden_TOMTIM-_A10b.raw;	1	Intra	null	5.31e-15	ILKYVDIGKNEGATLITGGER(3)-LGSKGYFIKPTVFGDVK(4):0	ALDH4_YEAST	ALDH4_YEAST	sp|P46367|ALDH4_YEAST	sp|P46367|ALDH4_YEAST	sp|P46367|ALDH4_YEAST(377)-sp|P46367|ALDH4_YEAST(399)	39	377	399	12373	14.2749	10365;	File: "Z:\alinden\DATA\2017\06_Jun\170619[Ridhima_TOMTIM]w and wo blocking protein\RAW\TOMTIM-\R_Gomkale_Linden_TOMTIM-_A10b.raw"; ID: "10365"; scans: "12373"	-1.43385
no	DSS	388	1388	4273.22	4.02684	0	none	Z:\alinden\DATA\2017\06_Jun\170619[Ridhima_TOMTIM]w and wo blocking protein\RAW\TOMTIM-\R_Gomkale_Linden_TOMTIM-_A10b.raw;	1	Inter	null	0.000384	DWLTDKGYDQLYGARPLNR(6)-LGSKGYFIKPTVFGDVK(9):0	HSP78_YEAST	ALDH4_YEAST	sp|P33416|HSP78_YEAST	sp|P46367|ALDH4_YEAST	sp|P33416|HSP78_YEAST(746)-sp|P46367|ALDH4_YEAST(404)	1	746	404	12401	3.41567	10391;	File: "Z:\alinden\DATA\2017\06_Jun\170619[Ridhima_TOMTIM]w and wo blocking protein\RAW\TOMTIM-\R_Gomkale_Linden_TOMTIM-_A10b.raw"; ID: "10391"; scans: "12401"	941.234
no	DSS	389	1389	5143.49	1.00373	0	none	Z:\alinden\DATA\2017\06_Jun\170619[Ridhima_TOMTIM]w and wo blocking protein\RAW\TOMTIM-\R_Gomkale_Linden_TOMTIM-_A10b.raw;	1	Intra	null	1.67e-15	AASESIKVGDPFDESTFQGAQTSQMQLNK(7)-YVDIGKNEGATLITGGER(6):0	ALDH4_YEAST	ALDH4_YEAST	sp|P46367|ALDH4_YEAST	sp|P46367|ALDH4_YEAST	sp|P46367|ALDH4_YEAST(352)-sp|P46367|ALDH4_YEAST(383)	4	352	383	12406	14.7773	10396;	File: "Z:\alinden\DATA\2017\06_Jun\170619[Ridhima_TOMTIM]w and wo blocking protein\RAW\TOMTIM-\R_Gomkale_Linden_TOMTIM-_A10b.raw"; ID: "10396"; scans: "12406"	195.069
no	DSS	390	1390	4299.16	0.99596	0	none	Z:\alinden\DATA\2017\06_Jun\170619[Ridhima_TOMTIM]w and wo blocking protein\RAW\TOMTIM-\R_Gomkale_Linden_TOMTIM-_A10b.raw;	1	Intra	null	5.19e-08	AASESIKVGDPFDESTFQGAQTSQMQLNK(7)-ILKYVDIGK(3):0	ALDH4_YEAST	ALDH4_YEAST	sp|P46367|ALDH4_YEAST	sp|P46367|ALDH4_YEAST	sp|P46367|ALDH4_YEAST(352)-sp|P46367|ALDH4_YEAST(377)	17	352	377	12440	7.28483	10428;	File: "Z:\alinden\DATA\2017\06_Jun\170619[Ridhima_TOMTIM]w and wo blocking protein\RAW\TOMTIM-\R_Gomkale_Linden_TOMTIM-_A10b.raw"; ID: "10428"; scans: "12440"	231.556
no	DSS	391	1391	3510.86	2.00304	0	none	Z:\alinden\DATA\2017\06_Jun\170619[Ridhima_TOMTIM]w and wo blocking protein\RAW\TOMTIM-\R_Gomkale_Linden_TOMTIM-_A10b.raw;	1	Intra	null	0.000987	HEDGKITEETIPYGTLIWATGNK(5)-QLLAKTK(5):0	NDI1_YEAST	NDI1_YEAST	sp|P32340|NDI1_YEAST	sp|P32340|NDI1_YEAST	sp|P32340|NDI1_YEAST(324)-sp|P32340|NDI1_YEAST(317)	2	324	317	12448	3.00568	10436;	File: "Z:\alinden\DATA\2017\06_Jun\170619[Ridhima_TOMTIM]w and wo blocking protein\RAW\TOMTIM-\R_Gomkale_Linden_TOMTIM-_A10b.raw"; ID: "10436"; scans: "12448"	570.038
no	DSS	392	1392	3312.89	1.00703	0	none	Z:\alinden\DATA\2017\06_Jun\170619[Ridhima_TOMTIM]w and wo blocking protein\RAW\TOMTIM-\R_Gomkale_Linden_TOMTIM-_A10b.raw;	1	Inter	null	1.37e-09	NLVALKGPLATPIGKGHR(15)-ANIMKLGDGLFR(5):0	IDH2_YEAST	IDH1_YEAST	sp|P28241|IDH2_YEAST	sp|P28834|IDH1_YEAST	sp|P28241|IDH2_YEAST(109)-sp|P28834|IDH1_YEAST(199)	7	109	199	12464	8.86328	10451;	File: "Z:\alinden\DATA\2017\06_Jun\170619[Ridhima_TOMTIM]w and wo blocking protein\RAW\TOMTIM-\R_Gomkale_Linden_TOMTIM-_A10b.raw"; ID: "10451"; scans: "12464"	303.789
no	DSS	393	1393	3625.84	0.99703	0	none	Z:\alinden\DATA\2017\06_Jun\170619[Ridhima_TOMTIM]w and wo blocking protein\RAW\TOMTIM-\R_Gomkale_Linden_TOMTIM-_A10b.raw;	1	Intra	null	1.32e-07	VGDPFDESTFQGAQTSQMQLNKILK(22)-GKALYR(2):0	ALDH4_YEAST	ALDH4_YEAST	sp|P46367|ALDH4_YEAST	sp|P46367|ALDH4_YEAST	sp|P46367|ALDH4_YEAST(374)-sp|P46367|ALDH4_YEAST(110)	4	374	110	12467	6.87943	10454;	File: "Z:\alinden\DATA\2017\06_Jun\170619[Ridhima_TOMTIM]w and wo blocking protein\RAW\TOMTIM-\R_Gomkale_Linden_TOMTIM-_A10b.raw"; ID: "10454"; scans: "12467"	274.827
no	DSS	394	1394	4239.32	-0.00711	0	none	Z:\alinden\DATA\2017\06_Jun\170619[Ridhima_TOMTIM]w and wo blocking protein\RAW\TOMTIM-\R_Gomkale_Linden_TOMTIM-_A10b.raw;	1	Intra	null	2.01e-11	ILKYVDIGKNEGATLITGGER(3)-LGSKGYFIKPTVFGDVK(4):0	ALDH4_YEAST	ALDH4_YEAST	sp|P46367|ALDH4_YEAST	sp|P46367|ALDH4_YEAST	sp|P46367|ALDH4_YEAST(377)-sp|P46367|ALDH4_YEAST(399)	39	377	399	12475	10.6968	10461;	File: "Z:\alinden\DATA\2017\06_Jun\170619[Ridhima_TOMTIM]w and wo blocking protein\RAW\TOMTIM-\R_Gomkale_Linden_TOMTIM-_A10b.raw"; ID: "10461"; scans: "12475"	-1.67676
no	DSS	395	1395	3312.89	0.00287	0	none	Z:\alinden\DATA\2017\06_Jun\170619[Ridhima_TOMTIM]w and wo blocking protein\RAW\TOMTIM-\R_Gomkale_Linden_TOMTIM-_A10b.raw;	1	Inter	null	1.07e-08	NLVALKGPLATPIGKGHR(15)-ANIMKLGDGLFR(5):0	IDH2_YEAST	IDH1_YEAST	sp|P28241|IDH2_YEAST	sp|P28834|IDH1_YEAST	sp|P28241|IDH2_YEAST(109)-sp|P28834|IDH1_YEAST(199)	7	109	199	12481	7.97062	10467;	File: "Z:\alinden\DATA\2017\06_Jun\170619[Ridhima_TOMTIM]w and wo blocking protein\RAW\TOMTIM-\R_Gomkale_Linden_TOMTIM-_A10b.raw"; ID: "10467"; scans: "12481"	0.86605
no	DSS	396	1396	3312.89	1.0043	0	none	Z:\alinden\DATA\2017\06_Jun\170619[Ridhima_TOMTIM]w and wo blocking protein\RAW\TOMTIM-\R_Gomkale_Linden_TOMTIM-_A10b.raw;	1	Inter	null	2.98e-06	NLVALKGPLATPIGKGHR(15)-ANIMKLGDGLFR(5):0	IDH2_YEAST	IDH1_YEAST	sp|P28241|IDH2_YEAST	sp|P28834|IDH1_YEAST	sp|P28241|IDH2_YEAST(109)-sp|P28834|IDH1_YEAST(199)	7	109	199	12499	5.52578	10484;	File: "Z:\alinden\DATA\2017\06_Jun\170619[Ridhima_TOMTIM]w and wo blocking protein\RAW\TOMTIM-\R_Gomkale_Linden_TOMTIM-_A10b.raw"; ID: "10484"; scans: "12499"	302.966
no	DSS	397	1397	3312.89	-0.00074	0	none	Z:\alinden\DATA\2017\06_Jun\170619[Ridhima_TOMTIM]w and wo blocking protein\RAW\TOMTIM-\R_Gomkale_Linden_TOMTIM-_A10b.raw;	1	Inter	null	1.52e-05	NLVALKGPLATPIGKGHR(15)-ANIMKLGDGLFR(5):0	IDH2_YEAST	IDH1_YEAST	sp|P28241|IDH2_YEAST	sp|P28834|IDH1_YEAST	sp|P28241|IDH2_YEAST(109)-sp|P28834|IDH1_YEAST(199)	7	109	199	12525	4.81816	10508;	File: "Z:\alinden\DATA\2017\06_Jun\170619[Ridhima_TOMTIM]w and wo blocking protein\RAW\TOMTIM-\R_Gomkale_Linden_TOMTIM-_A10b.raw"; ID: "10508"; scans: "12525"	-0.223302
no	DSS	398	1398	3647.92	-0.00748	0	none	Z:\alinden\DATA\2017\06_Jun\170619[Ridhima_TOMTIM]w and wo blocking protein\RAW\TOMTIM-\R_Gomkale_Linden_TOMTIM-_A10b.raw;	1	Intra	null	1.42e-13	QTDHKEGVYEAVESLKR(5)-KQLDIYANVALFK(1):0	IDH1_YEAST	IDH1_YEAST	sp|P28834|IDH1_YEAST	sp|P28834|IDH1_YEAST	sp|P28834|IDH1_YEAST(71)-sp|P28834|IDH1_YEAST(110)	12	71	110	12526	12.8477	10509;	File: "Z:\alinden\DATA\2017\06_Jun\170619[Ridhima_TOMTIM]w and wo blocking protein\RAW\TOMTIM-\R_Gomkale_Linden_TOMTIM-_A10b.raw"; ID: "10509"; scans: "12526"	-2.04992
no	DSS	399	1399	3647.92	2.00042	0	none	Z:\alinden\DATA\2017\06_Jun\170619[Ridhima_TOMTIM]w and wo blocking protein\RAW\TOMTIM-\R_Gomkale_Linden_TOMTIM-_A10b.raw;	1	Intra	null	3.61e-13	QTDHKEGVYEAVESLKR(5)-KQLDIYANVALFK(1):0	IDH1_YEAST	IDH1_YEAST	sp|P28834|IDH1_YEAST	sp|P28834|IDH1_YEAST	sp|P28834|IDH1_YEAST(71)-sp|P28834|IDH1_YEAST(110)	12	71	110	12528	12.4425	10511;	File: "Z:\alinden\DATA\2017\06_Jun\170619[Ridhima_TOMTIM]w and wo blocking protein\RAW\TOMTIM-\R_Gomkale_Linden_TOMTIM-_A10b.raw"; ID: "10511"; scans: "12528"	547.921
no	DSS	400	1400	3647.92	-0.00391	0	none	Z:\alinden\DATA\2017\06_Jun\170619[Ridhima_TOMTIM]w and wo blocking protein\RAW\TOMTIM-\R_Gomkale_Linden_TOMTIM-_A10b.raw;	1	Intra	null	2.73e-13	QTDHKEGVYEAVESLKR(5)-KQLDIYANVALFK(1):0	IDH1_YEAST	IDH1_YEAST	sp|P28834|IDH1_YEAST	sp|P28834|IDH1_YEAST	sp|P28834|IDH1_YEAST(71)-sp|P28834|IDH1_YEAST(110)	12	71	110	12541	12.5638	10523;	File: "Z:\alinden\DATA\2017\06_Jun\170619[Ridhima_TOMTIM]w and wo blocking protein\RAW\TOMTIM-\R_Gomkale_Linden_TOMTIM-_A10b.raw"; ID: "10523"; scans: "12541"	-1.07155
no	DSS	401	1401	3647.92	-0.00019	0	none	Z:\alinden\DATA\2017\06_Jun\170619[Ridhima_TOMTIM]w and wo blocking protein\RAW\TOMTIM-\R_Gomkale_Linden_TOMTIM-_A10b.raw;	1	Intra	null	2.16e-13	QTDHKEGVYEAVESLKR(5)-KQLDIYANVALFK(1):0	IDH1_YEAST	IDH1_YEAST	sp|P28834|IDH1_YEAST	sp|P28834|IDH1_YEAST	sp|P28834|IDH1_YEAST(71)-sp|P28834|IDH1_YEAST(110)	12	71	110	12600	12.6655	10579;	File: "Z:\alinden\DATA\2017\06_Jun\170619[Ridhima_TOMTIM]w and wo blocking protein\RAW\TOMTIM-\R_Gomkale_Linden_TOMTIM-_A10b.raw"; ID: "10579"; scans: "12600"	-0.05207
no	DSS	402	1402	5497.76	1.00041	0	none	Z:\alinden\DATA\2017\06_Jun\170619[Ridhima_TOMTIM]w and wo blocking protein\RAW\TOMTIM-\R_Gomkale_Linden_TOMTIM-_A10b.raw;	1	Intra	null	2.34e-19	AASESIKVGDPFDESTFQGAQTSQMQLNK(7)-ILKYVDIGKNEGATLITGGER(3):0	ALDH4_YEAST	ALDH4_YEAST	sp|P46367|ALDH4_YEAST	sp|P46367|ALDH4_YEAST	sp|P46367|ALDH4_YEAST(352)-sp|P46367|ALDH4_YEAST(377)	17	352	377	12655	18.6308	10631;	File: "Z:\alinden\DATA\2017\06_Jun\170619[Ridhima_TOMTIM]w and wo blocking protein\RAW\TOMTIM-\R_Gomkale_Linden_TOMTIM-_A10b.raw"; ID: "10631"; scans: "12655"	181.901
no	DSS	403	1403	5122.55	1.01085	0	none	Z:\alinden\DATA\2017\06_Jun\170619[Ridhima_TOMTIM]w and wo blocking protein\RAW\TOMTIM-\R_Gomkale_Linden_TOMTIM-_A10b.raw;	1	Intra	25,M(Oxidation[M]);	3.43e-05	AASESIKVGDPFDESTFQGAQTSQMQLNK(7)-LGSKGYFIKPTVFGDVK(4):0	ALDH4_YEAST	ALDH4_YEAST	sp|P46367|ALDH4_YEAST	sp|P46367|ALDH4_YEAST	sp|P46367|ALDH4_YEAST(352)-sp|P46367|ALDH4_YEAST(399)	18	352	399	12672	4.46471	10647;	File: "Z:\alinden\DATA\2017\06_Jun\170619[Ridhima_TOMTIM]w and wo blocking protein\RAW\TOMTIM-\R_Gomkale_Linden_TOMTIM-_A10b.raw"; ID: "10647"; scans: "12672"	197.256
no	DSS	404	1404	5497.76	4.01169	0	none	Z:\alinden\DATA\2017\06_Jun\170619[Ridhima_TOMTIM]w and wo blocking protein\RAW\TOMTIM-\R_Gomkale_Linden_TOMTIM-_A10b.raw;	1	Intra	null	9.95e-13	AASESIKVGDPFDESTFQGAQTSQMQLNK(7)-ILKYVDIGKNEGATLITGGER(3):0	ALDH4_YEAST	ALDH4_YEAST	sp|P46367|ALDH4_YEAST	sp|P46367|ALDH4_YEAST	sp|P46367|ALDH4_YEAST(352)-sp|P46367|ALDH4_YEAST(377)	17	352	377	12691	12.0022	10665;	File: "Z:\alinden\DATA\2017\06_Jun\170619[Ridhima_TOMTIM]w and wo blocking protein\RAW\TOMTIM-\R_Gomkale_Linden_TOMTIM-_A10b.raw"; ID: "10665"; scans: "12691"	729.03
no	DSS	405	1405	4467.37	2.01486	0	none	Z:\alinden\DATA\2017\06_Jun\170619[Ridhima_TOMTIM]w and wo blocking protein\RAW\TOMTIM-\R_Gomkale_Linden_TOMTIM-_A10b.raw;	1	Intra	13,C(Carbamidomethyl[C]);	7.24e-10	ELIVAITSDKGLCGSIHSQLAK(10)-HLNDQPNADIVTIGDKIK(16):0	ATPG_YEAST	ATPG_YEAST	sp|P38077|ATPG_YEAST	sp|P38077|ATPG_YEAST	sp|P38077|ATPG_YEAST(114)-sp|P38077|ATPG_YEAST(146)	1	114	146	12705	9.14026	10678;	File: "Z:\alinden\DATA\2017\06_Jun\170619[Ridhima_TOMTIM]w and wo blocking protein\RAW\TOMTIM-\R_Gomkale_Linden_TOMTIM-_A10b.raw"; ID: "10678"; scans: "12705"	450.712
no	DSS	406	1406	4272.09	0.00257	0	none	Z:\alinden\DATA\2017\06_Jun\170619[Ridhima_TOMTIM]w and wo blocking protein\RAW\TOMTIM-\R_Gomkale_Linden_TOMTIM-_A10b.raw;	1	Intra	null	3.1e-06	SADEVINMANDSEYGLAAGIHTSNINTALKVADR(30)-AKLDE(2):0	ALDH4_YEAST	ALDH4_YEAST	sp|P46367|ALDH4_YEAST	sp|P46367|ALDH4_YEAST	sp|P46367|ALDH4_YEAST(463)-sp|P46367|ALDH4_YEAST(516)	3	463	516	12760	5.50864	10730;	File: "Z:\alinden\DATA\2017\06_Jun\170619[Ridhima_TOMTIM]w and wo blocking protein\RAW\TOMTIM-\R_Gomkale_Linden_TOMTIM-_A10b.raw"; ID: "10730"; scans: "12760"	0.601438
no	DSS	407	1407	4272.09	0.00115	0	none	Z:\alinden\DATA\2017\06_Jun\170619[Ridhima_TOMTIM]w and wo blocking protein\RAW\TOMTIM-\R_Gomkale_Linden_TOMTIM-_A10b.raw;	1	Intra	null	3.59e-05	SADEVINMANDSEYGLAAGIHTSNINTALKVADR(30)-AKLDE(2):0	ALDH4_YEAST	ALDH4_YEAST	sp|P46367|ALDH4_YEAST	sp|P46367|ALDH4_YEAST	sp|P46367|ALDH4_YEAST(463)-sp|P46367|ALDH4_YEAST(516)	3	463	516	12771	4.44491	10740;	File: "Z:\alinden\DATA\2017\06_Jun\170619[Ridhima_TOMTIM]w and wo blocking protein\RAW\TOMTIM-\R_Gomkale_Linden_TOMTIM-_A10b.raw"; ID: "10740"; scans: "12771"	0.269126
no	DSS	408	1408	4114.06	-0.00338	0	none	Z:\alinden\DATA\2017\06_Jun\170619[Ridhima_TOMTIM]w and wo blocking protein\RAW\TOMTIM-\R_Gomkale_Linden_TOMTIM-_A10b.raw;	1	Intra	null	5.59e-08	APMLTTDNLKASLVYHDGSFNDSR(10)-SYLLSKSATVEK(6):0	GPDM_YEAST	GPDM_YEAST	sp|P32191|GPDM_YEAST	sp|P32191|GPDM_YEAST	sp|P32191|GPDM_YEAST(211)-sp|P32191|GPDM_YEAST(195)	4	211	195	12820	7.25259	10787;	File: "Z:\alinden\DATA\2017\06_Jun\170619[Ridhima_TOMTIM]w and wo blocking protein\RAW\TOMTIM-\R_Gomkale_Linden_TOMTIM-_A10b.raw"; ID: "10787"; scans: "12820"	-0.821373
no	DSS	409	1409	3501.02	0.00244	0	none	Z:\alinden\DATA\2017\06_Jun\170619[Ridhima_TOMTIM]w and wo blocking protein\RAW\TOMTIM-\R_Gomkale_Linden_TOMTIM-_A10b.raw;	1	Inter	null	7.69e-13	NLVALKGPLATPIGKGHR(15)-KQLDIYANVALFK(1):0	IDH2_YEAST	IDH1_YEAST	sp|P28241|IDH2_YEAST	sp|P28834|IDH1_YEAST	sp|P28241|IDH2_YEAST(109)-sp|P28834|IDH1_YEAST(110)	2	109	110	12969	12.1141	10928;	File: "Z:\alinden\DATA\2017\06_Jun\170619[Ridhima_TOMTIM]w and wo blocking protein\RAW\TOMTIM-\R_Gomkale_Linden_TOMTIM-_A10b.raw"; ID: "10928"; scans: "12969"	0.696738
no	DSS	410	1410	4031.03	2.00855	0	none	Z:\alinden\DATA\2017\06_Jun\170619[Ridhima_TOMTIM]w and wo blocking protein\RAW\TOMTIM-\R_Gomkale_Linden_TOMTIM-_A10b.raw;	1	Intra	null	1.01e-10	GYFIKPTVFGDVKEDMR(13)-YVDIGKNEGATLITGGER(6):0	ALDH4_YEAST	ALDH4_YEAST	sp|P46367|ALDH4_YEAST	sp|P46367|ALDH4_YEAST	sp|P46367|ALDH4_YEAST(412)-sp|P46367|ALDH4_YEAST(383)	6	412	383	13008	9.99568	10964;	File: "Z:\alinden\DATA\2017\06_Jun\170619[Ridhima_TOMTIM]w and wo blocking protein\RAW\TOMTIM-\R_Gomkale_Linden_TOMTIM-_A10b.raw"; ID: "10964"; scans: "13008"	497.899
no	DSS	411	1411	4031.03	1	0	none	Z:\alinden\DATA\2017\06_Jun\170619[Ridhima_TOMTIM]w and wo blocking protein\RAW\TOMTIM-\R_Gomkale_Linden_TOMTIM-_A10b.raw;	1	Intra	null	2.15e-10	GYFIKPTVFGDVKEDMR(13)-YVDIGKNEGATLITGGER(6):0	ALDH4_YEAST	ALDH4_YEAST	sp|P46367|ALDH4_YEAST	sp|P46367|ALDH4_YEAST	sp|P46367|ALDH4_YEAST(412)-sp|P46367|ALDH4_YEAST(383)	6	412	383	13028	9.66756	10983;	File: "Z:\alinden\DATA\2017\06_Jun\170619[Ridhima_TOMTIM]w and wo blocking protein\RAW\TOMTIM-\R_Gomkale_Linden_TOMTIM-_A10b.raw"; ID: "10983"; scans: "13028"	247.952
no	DSS	412	1412	4438.36	0.00557	0	none	Z:\alinden\DATA\2017\06_Jun\170619[Ridhima_TOMTIM]w and wo blocking protein\RAW\TOMTIM-\R_Gomkale_Linden_TOMTIM-_A10b.raw;	1	Intra	null	5.52e-11	LAELIEQDKDVIASIETLDNGKAISSSR(22)-HIYQSAAAGLKK(11):0	ALDH4_YEAST	ALDH4_YEAST	sp|P46367|ALDH4_YEAST	sp|P46367|ALDH4_YEAST	sp|P46367|ALDH4_YEAST(136)-sp|P46367|ALDH4_YEAST(285)	4	136	285	13061	10.2581	11014;	File: "Z:\alinden\DATA\2017\06_Jun\170619[Ridhima_TOMTIM]w and wo blocking protein\RAW\TOMTIM-\R_Gomkale_Linden_TOMTIM-_A10b.raw"; ID: "11014"; scans: "13061"	1.25468
no	DSS	413	1413	4031.03	0.00032	0	none	Z:\alinden\DATA\2017\06_Jun\170619[Ridhima_TOMTIM]w and wo blocking protein\RAW\TOMTIM-\R_Gomkale_Linden_TOMTIM-_A10b.raw;	1	Intra	null	1e-15	GYFIKPTVFGDVKEDMR(13)-YVDIGKNEGATLITGGER(6):0	ALDH4_YEAST	ALDH4_YEAST	sp|P46367|ALDH4_YEAST	sp|P46367|ALDH4_YEAST	sp|P46367|ALDH4_YEAST(412)-sp|P46367|ALDH4_YEAST(383)	6	412	383	13064	15	11017;	File: "Z:\alinden\DATA\2017\06_Jun\170619[Ridhima_TOMTIM]w and wo blocking protein\RAW\TOMTIM-\R_Gomkale_Linden_TOMTIM-_A10b.raw"; ID: "11017"; scans: "13064"	0.079364
no	DSS	414	1414	4031.03	0.00315	0	none	Z:\alinden\DATA\2017\06_Jun\170619[Ridhima_TOMTIM]w and wo blocking protein\RAW\TOMTIM-\R_Gomkale_Linden_TOMTIM-_A10b.raw;	1	Intra	null	2.98e-10	GYFIKPTVFGDVKEDMR(13)-YVDIGKNEGATLITGGER(6):0	ALDH4_YEAST	ALDH4_YEAST	sp|P46367|ALDH4_YEAST	sp|P46367|ALDH4_YEAST	sp|P46367|ALDH4_YEAST(412)-sp|P46367|ALDH4_YEAST(383)	6	412	383	13095	9.52578	11046;	File: "Z:\alinden\DATA\2017\06_Jun\170619[Ridhima_TOMTIM]w and wo blocking protein\RAW\TOMTIM-\R_Gomkale_Linden_TOMTIM-_A10b.raw"; ID: "11046"; scans: "13095"	0.781241
no	DSS	415	1415	5106.55	1.00436	0	none	Z:\alinden\DATA\2017\06_Jun\170619[Ridhima_TOMTIM]w and wo blocking protein\RAW\TOMTIM-\R_Gomkale_Linden_TOMTIM-_A10b.raw;	1	Intra	null	3.96e-17	AASESIKVGDPFDESTFQGAQTSQMQLNK(7)-LGSKGYFIKPTVFGDVK(4):0	ALDH4_YEAST	ALDH4_YEAST	sp|P46367|ALDH4_YEAST	sp|P46367|ALDH4_YEAST	sp|P46367|ALDH4_YEAST(352)-sp|P46367|ALDH4_YEAST(399)	18	352	399	13100	16.4023	11051;	File: "Z:\alinden\DATA\2017\06_Jun\170619[Ridhima_TOMTIM]w and wo blocking protein\RAW\TOMTIM-\R_Gomkale_Linden_TOMTIM-_A10b.raw"; ID: "11051"; scans: "13100"	196.603
no	DSS	416	1416	5106.55	2.0024	0	none	Z:\alinden\DATA\2017\06_Jun\170619[Ridhima_TOMTIM]w and wo blocking protein\RAW\TOMTIM-\R_Gomkale_Linden_TOMTIM-_A10b.raw;	1	Intra	null	4.58e-14	AASESIKVGDPFDESTFQGAQTSQMQLNK(7)-LGSKGYFIKPTVFGDVK(4):0	ALDH4_YEAST	ALDH4_YEAST	sp|P46367|ALDH4_YEAST	sp|P46367|ALDH4_YEAST	sp|P46367|ALDH4_YEAST(352)-sp|P46367|ALDH4_YEAST(399)	18	352	399	13120	13.3391	11070;	File: "Z:\alinden\DATA\2017\06_Jun\170619[Ridhima_TOMTIM]w and wo blocking protein\RAW\TOMTIM-\R_Gomkale_Linden_TOMTIM-_A10b.raw"; ID: "11070"; scans: "13120"	391.893
no	DSS	417	1417	5106.55	2.00696	0	none	Z:\alinden\DATA\2017\06_Jun\170619[Ridhima_TOMTIM]w and wo blocking protein\RAW\TOMTIM-\R_Gomkale_Linden_TOMTIM-_A10b.raw;	1	Intra	null	9.21e-12	AASESIKVGDPFDESTFQGAQTSQMQLNK(7)-LGSKGYFIKPTVFGDVK(4):0	ALDH4_YEAST	ALDH4_YEAST	sp|P46367|ALDH4_YEAST	sp|P46367|ALDH4_YEAST	sp|P46367|ALDH4_YEAST(352)-sp|P46367|ALDH4_YEAST(399)	18	352	399	13135	11.0357	11084;	File: "Z:\alinden\DATA\2017\06_Jun\170619[Ridhima_TOMTIM]w and wo blocking protein\RAW\TOMTIM-\R_Gomkale_Linden_TOMTIM-_A10b.raw"; ID: "11084"; scans: "13135"	392.785
no	DSS	418	1418	5106.55	1.00828	0	none	Z:\alinden\DATA\2017\06_Jun\170619[Ridhima_TOMTIM]w and wo blocking protein\RAW\TOMTIM-\R_Gomkale_Linden_TOMTIM-_A10b.raw;	1	Intra	null	1.24e-17	AASESIKVGDPFDESTFQGAQTSQMQLNK(7)-LGSKGYFIKPTVFGDVK(4):0	ALDH4_YEAST	ALDH4_YEAST	sp|P46367|ALDH4_YEAST	sp|P46367|ALDH4_YEAST	sp|P46367|ALDH4_YEAST(352)-sp|P46367|ALDH4_YEAST(399)	18	352	399	13253	16.9066	11194;	File: "Z:\alinden\DATA\2017\06_Jun\170619[Ridhima_TOMTIM]w and wo blocking protein\RAW\TOMTIM-\R_Gomkale_Linden_TOMTIM-_A10b.raw"; ID: "11194"; scans: "13253"	197.37
no	DSS	419	1419	4031.03	-0.02056	0	none	Z:\alinden\DATA\2017\06_Jun\170619[Ridhima_TOMTIM]w and wo blocking protein\RAW\TOMTIM-\R_Gomkale_Linden_TOMTIM-_A10b.raw;	1	Intra	null	7.41e-18	GYFIKPTVFGDVKEDMR(5)-YVDIGKNEGATLITGGER(6):0	ALDH4_YEAST	ALDH4_YEAST	sp|P46367|ALDH4_YEAST	sp|P46367|ALDH4_YEAST	sp|P46367|ALDH4_YEAST(404)-sp|P46367|ALDH4_YEAST(383)	3	404	383	13263	17.1302	11204;	File: "Z:\alinden\DATA\2017\06_Jun\170619[Ridhima_TOMTIM]w and wo blocking protein\RAW\TOMTIM-\R_Gomkale_Linden_TOMTIM-_A10b.raw"; ID: "11204"; scans: "13263"	-5.09918
no	DSS	420	1420	4031.03	0.00115	0	none	Z:\alinden\DATA\2017\06_Jun\170619[Ridhima_TOMTIM]w and wo blocking protein\RAW\TOMTIM-\R_Gomkale_Linden_TOMTIM-_A10b.raw;	1	Intra	null	1.13e-08	GYFIKPTVFGDVKEDMR(5)-YVDIGKNEGATLITGGER(6):0	ALDH4_YEAST	ALDH4_YEAST	sp|P46367|ALDH4_YEAST	sp|P46367|ALDH4_YEAST	sp|P46367|ALDH4_YEAST(404)-sp|P46367|ALDH4_YEAST(383)	3	404	383	13313	7.94692	11251;	File: "Z:\alinden\DATA\2017\06_Jun\170619[Ridhima_TOMTIM]w and wo blocking protein\RAW\TOMTIM-\R_Gomkale_Linden_TOMTIM-_A10b.raw"; ID: "11251"; scans: "13313"	0.285215
no	DSS	421	1421	5106.55	1.0068	0	none	Z:\alinden\DATA\2017\06_Jun\170619[Ridhima_TOMTIM]w and wo blocking protein\RAW\TOMTIM-\R_Gomkale_Linden_TOMTIM-_A10b.raw;	1	Intra	null	1.8e-07	AASESIKVGDPFDESTFQGAQTSQMQLNK(7)-LGSKGYFIKPTVFGDVK(4):0	ALDH4_YEAST	ALDH4_YEAST	sp|P46367|ALDH4_YEAST	sp|P46367|ALDH4_YEAST	sp|P46367|ALDH4_YEAST(352)-sp|P46367|ALDH4_YEAST(399)	18	352	399	13334	6.74473	11271;	File: "Z:\alinden\DATA\2017\06_Jun\170619[Ridhima_TOMTIM]w and wo blocking protein\RAW\TOMTIM-\R_Gomkale_Linden_TOMTIM-_A10b.raw"; ID: "11271"; scans: "13334"	197.081
no	DSS	422	1422	4385.3	0.00412	0	none	Z:\alinden\DATA\2017\06_Jun\170619[Ridhima_TOMTIM]w and wo blocking protein\RAW\TOMTIM-\R_Gomkale_Linden_TOMTIM-_A10b.raw;	1	Intra	null	3.01e-09	ILKYVDIGKNEGATLITGGER(3)-GYFIKPTVFGDVKEDMR(13):0	ALDH4_YEAST	ALDH4_YEAST	sp|P46367|ALDH4_YEAST	sp|P46367|ALDH4_YEAST	sp|P46367|ALDH4_YEAST(377)-sp|P46367|ALDH4_YEAST(412)	8	377	412	13366	8.52143	11301;	File: "Z:\alinden\DATA\2017\06_Jun\170619[Ridhima_TOMTIM]w and wo blocking protein\RAW\TOMTIM-\R_Gomkale_Linden_TOMTIM-_A10b.raw"; ID: "11301"; scans: "13366"	0.939286
no	DSS	423	1423	4385.3	2.00959	0	none	Z:\alinden\DATA\2017\06_Jun\170619[Ridhima_TOMTIM]w and wo blocking protein\RAW\TOMTIM-\R_Gomkale_Linden_TOMTIM-_A10b.raw;	1	Intra	null	1.78e-16	ILKYVDIGKNEGATLITGGER(3)-GYFIKPTVFGDVKEDMR(13):0	ALDH4_YEAST	ALDH4_YEAST	sp|P46367|ALDH4_YEAST	sp|P46367|ALDH4_YEAST	sp|P46367|ALDH4_YEAST(377)-sp|P46367|ALDH4_YEAST(412)	8	377	412	13392	15.7496	11326;	File: "Z:\alinden\DATA\2017\06_Jun\170619[Ridhima_TOMTIM]w and wo blocking protein\RAW\TOMTIM-\R_Gomkale_Linden_TOMTIM-_A10b.raw"; ID: "11326"; scans: "13392"	457.941
no	DSS	424	1424	4772.46	2.02518	0	none	Z:\alinden\DATA\2017\06_Jun\170619[Ridhima_TOMTIM]w and wo blocking protein\RAW\TOMTIM-\R_Gomkale_Linden_TOMTIM-_A10b.raw;	1	Intra	null	5.7e-05	QKLPWAQLTEPEKQAVWYISYGEWGPR(13)-PVLNKGDSSFIAK(5):0	COX5A_YEAST	COX5A_YEAST	sp|P00424|COX5A_YEAST	sp|P00424|COX5A_YEAST	sp|P00424|COX5A_YEAST(69)-sp|P00424|COX5A_YEAST(89)	21	69	89	13579	4.24413	11503;	File: "Z:\alinden\DATA\2017\06_Jun\170619[Ridhima_TOMTIM]w and wo blocking protein\RAW\TOMTIM-\R_Gomkale_Linden_TOMTIM-_A10b.raw"; ID: "11503"; scans: "13579"	424.077
no	DSS	425	1425	4772.46	1.02527	0	none	Z:\alinden\DATA\2017\06_Jun\170619[Ridhima_TOMTIM]w and wo blocking protein\RAW\TOMTIM-\R_Gomkale_Linden_TOMTIM-_A10b.raw;	1	Intra	null	6.82e-06	QKLPWAQLTEPEKQAVWYISYGEWGPR(13)-PVLNKGDSSFIAK(5):0	COX5A_YEAST	COX5A_YEAST	sp|P00424|COX5A_YEAST	sp|P00424|COX5A_YEAST	sp|P00424|COX5A_YEAST(69)-sp|P00424|COX5A_YEAST(89)	21	69	89	13660	5.16622	11579;	File: "Z:\alinden\DATA\2017\06_Jun\170619[Ridhima_TOMTIM]w and wo blocking protein\RAW\TOMTIM-\R_Gomkale_Linden_TOMTIM-_A10b.raw"; ID: "11579"; scans: "13660"	214.739
no	DSS	426	1426	4772.46	3.02934	0	none	Z:\alinden\DATA\2017\06_Jun\170619[Ridhima_TOMTIM]w and wo blocking protein\RAW\TOMTIM-\R_Gomkale_Linden_TOMTIM-_A10b.raw;	1	Intra	null	8.01e-06	QKLPWAQLTEPEKQAVWYISYGEWGPR(13)-PVLNKGDSSFIAK(5):0	COX5A_YEAST	COX5A_YEAST	sp|P00424|COX5A_YEAST	sp|P00424|COX5A_YEAST	sp|P00424|COX5A_YEAST(69)-sp|P00424|COX5A_YEAST(89)	21	69	89	13697	5.09637	11613;	File: "Z:\alinden\DATA\2017\06_Jun\170619[Ridhima_TOMTIM]w and wo blocking protein\RAW\TOMTIM-\R_Gomkale_Linden_TOMTIM-_A10b.raw"; ID: "11613"; scans: "13697"	634.217
no	DSS	427	1427	3688	-0.00183	0	none	Z:\alinden\DATA\2017\06_Jun\170619[Ridhima_TOMTIM]w and wo blocking protein\RAW\TOMTIM-\R_Gomkale_Linden_TOMTIM-_A10b.raw;	1	Intra	null	2.21e-18	YVDIGKNEGATLITGGER(6)-IVKEEIFGPVVTVTK(3):0	ALDH4_YEAST	ALDH4_YEAST	sp|P46367|ALDH4_YEAST	sp|P46367|ALDH4_YEAST	sp|P46367|ALDH4_YEAST(383)-sp|P46367|ALDH4_YEAST(419)	13	383	419	13707	17.6556	11622;	File: "Z:\alinden\DATA\2017\06_Jun\170619[Ridhima_TOMTIM]w and wo blocking protein\RAW\TOMTIM-\R_Gomkale_Linden_TOMTIM-_A10b.raw"; ID: "11622"; scans: "13707"	-0.496069
no	DSS	428	1428	4772.46	1.03219	0	none	Z:\alinden\DATA\2017\06_Jun\170619[Ridhima_TOMTIM]w and wo blocking protein\RAW\TOMTIM-\R_Gomkale_Linden_TOMTIM-_A10b.raw;	1	Intra	null	2.31e-06	QKLPWAQLTEPEKQAVWYISYGEWGPR(13)-PVLNKGDSSFIAK(5):0	COX5A_YEAST	COX5A_YEAST	sp|P00424|COX5A_YEAST	sp|P00424|COX5A_YEAST	sp|P00424|COX5A_YEAST(69)-sp|P00424|COX5A_YEAST(89)	21	69	89	13741	5.63639	11654;	File: "Z:\alinden\DATA\2017\06_Jun\170619[Ridhima_TOMTIM]w and wo blocking protein\RAW\TOMTIM-\R_Gomkale_Linden_TOMTIM-_A10b.raw"; ID: "11654"; scans: "13741"	216.188
no	DSS	429	1429	3688	0.00212	0	none	Z:\alinden\DATA\2017\06_Jun\170619[Ridhima_TOMTIM]w and wo blocking protein\RAW\TOMTIM-\R_Gomkale_Linden_TOMTIM-_A10b.raw;	1	Intra	null	1.97e-11	YVDIGKNEGATLITGGER(6)-IVKEEIFGPVVTVTK(3):0	ALDH4_YEAST	ALDH4_YEAST	sp|P46367|ALDH4_YEAST	sp|P46367|ALDH4_YEAST	sp|P46367|ALDH4_YEAST(383)-sp|P46367|ALDH4_YEAST(419)	13	383	419	13786	10.7055	11697;	File: "Z:\alinden\DATA\2017\06_Jun\170619[Ridhima_TOMTIM]w and wo blocking protein\RAW\TOMTIM-\R_Gomkale_Linden_TOMTIM-_A10b.raw"; ID: "11697"; scans: "13786"	0.57468
no	DSS	430	1430	4772.46	2.03187	0	none	Z:\alinden\DATA\2017\06_Jun\170619[Ridhima_TOMTIM]w and wo blocking protein\RAW\TOMTIM-\R_Gomkale_Linden_TOMTIM-_A10b.raw;	1	Intra	null	4.2e-05	QKLPWAQLTEPEKQAVWYISYGEWGPR(13)-PVLNKGDSSFIAK(5):0	COX5A_YEAST	COX5A_YEAST	sp|P00424|COX5A_YEAST	sp|P00424|COX5A_YEAST	sp|P00424|COX5A_YEAST(69)-sp|P00424|COX5A_YEAST(89)	21	69	89	13800	4.37675	11710;	File: "Z:\alinden\DATA\2017\06_Jun\170619[Ridhima_TOMTIM]w and wo blocking protein\RAW\TOMTIM-\R_Gomkale_Linden_TOMTIM-_A10b.raw"; ID: "11710"; scans: "13800"	425.478
no	DSS	431	1431	3688	1.00341	0	none	Z:\alinden\DATA\2017\06_Jun\170619[Ridhima_TOMTIM]w and wo blocking protein\RAW\TOMTIM-\R_Gomkale_Linden_TOMTIM-_A10b.raw;	1	Intra	null	3.7e-16	YVDIGKNEGATLITGGER(6)-IVKEEIFGPVVTVTK(3):0	ALDH4_YEAST	ALDH4_YEAST	sp|P46367|ALDH4_YEAST	sp|P46367|ALDH4_YEAST	sp|P46367|ALDH4_YEAST(383)-sp|P46367|ALDH4_YEAST(419)	13	383	419	13849	15.4318	11756;	File: "Z:\alinden\DATA\2017\06_Jun\170619[Ridhima_TOMTIM]w and wo blocking protein\RAW\TOMTIM-\R_Gomkale_Linden_TOMTIM-_A10b.raw"; ID: "11756"; scans: "13849"	271.926
no	DSS	432	1432	4042.26	1.00825	0	none	Z:\alinden\DATA\2017\06_Jun\170619[Ridhima_TOMTIM]w and wo blocking protein\RAW\TOMTIM-\R_Gomkale_Linden_TOMTIM-_A10b.raw;	1	Intra	null	1.06e-12	ILKYVDIGKNEGATLITGGER(3)-IVKEEIFGPVVTVTK(3):0	ALDH4_YEAST	ALDH4_YEAST	sp|P46367|ALDH4_YEAST	sp|P46367|ALDH4_YEAST	sp|P46367|ALDH4_YEAST(377)-sp|P46367|ALDH4_YEAST(419)	29	377	419	13871	11.9747	11776;	File: "Z:\alinden\DATA\2017\06_Jun\170619[Ridhima_TOMTIM]w and wo blocking protein\RAW\TOMTIM-\R_Gomkale_Linden_TOMTIM-_A10b.raw"; ID: "11776"; scans: "13871"	249.303
no	DSS	433	1433	4772.46	2.03951	0	none	Z:\alinden\DATA\2017\06_Jun\170619[Ridhima_TOMTIM]w and wo blocking protein\RAW\TOMTIM-\R_Gomkale_Linden_TOMTIM-_A10b.raw;	1	Intra	null	0.000202	QKLPWAQLTEPEKQAVWYISYGEWGPR(13)-PVLNKGDSSFIAK(5):0	COX5A_YEAST	COX5A_YEAST	sp|P00424|COX5A_YEAST	sp|P00424|COX5A_YEAST	sp|P00424|COX5A_YEAST(69)-sp|P00424|COX5A_YEAST(89)	21	69	89	13876	3.69465	11781;	File: "Z:\alinden\DATA\2017\06_Jun\170619[Ridhima_TOMTIM]w and wo blocking protein\RAW\TOMTIM-\R_Gomkale_Linden_TOMTIM-_A10b.raw"; ID: "11781"; scans: "13876"	427.077
no	DSS	434	1434	4772.46	2.03034	0	none	Z:\alinden\DATA\2017\06_Jun\170619[Ridhima_TOMTIM]w and wo blocking protein\RAW\TOMTIM-\R_Gomkale_Linden_TOMTIM-_A10b.raw;	1	Intra	null	3.96e-06	QKLPWAQLTEPEKQAVWYISYGEWGPR(13)-PVLNKGDSSFIAK(5):0	COX5A_YEAST	COX5A_YEAST	sp|P00424|COX5A_YEAST	sp|P00424|COX5A_YEAST	sp|P00424|COX5A_YEAST(69)-sp|P00424|COX5A_YEAST(89)	21	69	89	13891	5.4023	11795;	File: "Z:\alinden\DATA\2017\06_Jun\170619[Ridhima_TOMTIM]w and wo blocking protein\RAW\TOMTIM-\R_Gomkale_Linden_TOMTIM-_A10b.raw"; ID: "11795"; scans: "13891"	425.157
no	DSS	435	1435	4042.26	0.00516	0	none	Z:\alinden\DATA\2017\06_Jun\170619[Ridhima_TOMTIM]w and wo blocking protein\RAW\TOMTIM-\R_Gomkale_Linden_TOMTIM-_A10b.raw;	1	Intra	null	2.72e-21	ILKYVDIGKNEGATLITGGER(3)-IVKEEIFGPVVTVTK(3):0	ALDH4_YEAST	ALDH4_YEAST	sp|P46367|ALDH4_YEAST	sp|P46367|ALDH4_YEAST	sp|P46367|ALDH4_YEAST(377)-sp|P46367|ALDH4_YEAST(419)	29	377	419	13896	20.5654	11800;	File: "Z:\alinden\DATA\2017\06_Jun\170619[Ridhima_TOMTIM]w and wo blocking protein\RAW\TOMTIM-\R_Gomkale_Linden_TOMTIM-_A10b.raw"; ID: "11800"; scans: "13896"	1.27619
no	DSS	436	1436	4042.26	-0.00673	0	none	Z:\alinden\DATA\2017\06_Jun\170619[Ridhima_TOMTIM]w and wo blocking protein\RAW\TOMTIM-\R_Gomkale_Linden_TOMTIM-_A10b.raw;	1	Intra	null	8.01e-22	ILKYVDIGKNEGATLITGGER(3)-IVKEEIFGPVVTVTK(3):0	ALDH4_YEAST	ALDH4_YEAST	sp|P46367|ALDH4_YEAST	sp|P46367|ALDH4_YEAST	sp|P46367|ALDH4_YEAST(377)-sp|P46367|ALDH4_YEAST(419)	29	377	419	13924	21.0964	11826;	File: "Z:\alinden\DATA\2017\06_Jun\170619[Ridhima_TOMTIM]w and wo blocking protein\RAW\TOMTIM-\R_Gomkale_Linden_TOMTIM-_A10b.raw"; ID: "11826"; scans: "13924"	-1.6645
no	DSS	437	1437	3688	2.01306	0	none	Z:\alinden\DATA\2017\06_Jun\170619[Ridhima_TOMTIM]w and wo blocking protein\RAW\TOMTIM-\R_Gomkale_Linden_TOMTIM-_A10b.raw;	1	Intra	null	4.03e-14	YVDIGKNEGATLITGGER(6)-IVKEEIFGPVVTVTK(3):0	ALDH4_YEAST	ALDH4_YEAST	sp|P46367|ALDH4_YEAST	sp|P46367|ALDH4_YEAST	sp|P46367|ALDH4_YEAST(383)-sp|P46367|ALDH4_YEAST(419)	13	383	419	13942	13.3947	11843;	File: "Z:\alinden\DATA\2017\06_Jun\170619[Ridhima_TOMTIM]w and wo blocking protein\RAW\TOMTIM-\R_Gomkale_Linden_TOMTIM-_A10b.raw"; ID: "11843"; scans: "13942"	545.394
no	DSS	438	1438	4042.26	-0.00495	0	none	Z:\alinden\DATA\2017\06_Jun\170619[Ridhima_TOMTIM]w and wo blocking protein\RAW\TOMTIM-\R_Gomkale_Linden_TOMTIM-_A10b.raw;	1	Intra	null	2.74e-20	ILKYVDIGKNEGATLITGGER(3)-IVKEEIFGPVVTVTK(3):0	ALDH4_YEAST	ALDH4_YEAST	sp|P46367|ALDH4_YEAST	sp|P46367|ALDH4_YEAST	sp|P46367|ALDH4_YEAST(377)-sp|P46367|ALDH4_YEAST(419)	29	377	419	14003	19.5622	11900;	File: "Z:\alinden\DATA\2017\06_Jun\170619[Ridhima_TOMTIM]w and wo blocking protein\RAW\TOMTIM-\R_Gomkale_Linden_TOMTIM-_A10b.raw"; ID: "11900"; scans: "14003"	-1.22426
no	DSS	439	1439	4042.26	1.00392	0	none	Z:\alinden\DATA\2017\06_Jun\170619[Ridhima_TOMTIM]w and wo blocking protein\RAW\TOMTIM-\R_Gomkale_Linden_TOMTIM-_A10b.raw;	1	Intra	null	9.47e-19	ILKYVDIGKNEGATLITGGER(3)-IVKEEIFGPVVTVTK(3):0	ALDH4_YEAST	ALDH4_YEAST	sp|P46367|ALDH4_YEAST	sp|P46367|ALDH4_YEAST	sp|P46367|ALDH4_YEAST(377)-sp|P46367|ALDH4_YEAST(419)	29	377	419	14019	18.0237	11915;	File: "Z:\alinden\DATA\2017\06_Jun\170619[Ridhima_TOMTIM]w and wo blocking protein\RAW\TOMTIM-\R_Gomkale_Linden_TOMTIM-_A10b.raw"; ID: "11915"; scans: "14019"	248.233
no	DSS	440	1440	4042.26	1.0058	0	none	Z:\alinden\DATA\2017\06_Jun\170619[Ridhima_TOMTIM]w and wo blocking protein\RAW\TOMTIM-\R_Gomkale_Linden_TOMTIM-_A10b.raw;	1	Intra	null	4.52e-16	ILKYVDIGKNEGATLITGGER(3)-IVKEEIFGPVVTVTK(3):0	ALDH4_YEAST	ALDH4_YEAST	sp|P46367|ALDH4_YEAST	sp|P46367|ALDH4_YEAST	sp|P46367|ALDH4_YEAST(377)-sp|P46367|ALDH4_YEAST(419)	29	377	419	14026	15.3449	11921;	File: "Z:\alinden\DATA\2017\06_Jun\170619[Ridhima_TOMTIM]w and wo blocking protein\RAW\TOMTIM-\R_Gomkale_Linden_TOMTIM-_A10b.raw"; ID: "11921"; scans: "14026"	248.697
no	DSS	441	1441	3499.82	4.00896	0	none	Z:\alinden\DATA\2017\06_Jun\170619[Ridhima_TOMTIM]w and wo blocking protein\RAW\TOMTIM-\R_Gomkale_Linden_TOMTIM-_A10b.raw;	1	Intra	null	6.36e-10	YVDIGKNEGATLITGGER(6)-GYFIKPTVFGDVK(5):0	ALDH4_YEAST	ALDH4_YEAST	sp|P46367|ALDH4_YEAST	sp|P46367|ALDH4_YEAST	sp|P46367|ALDH4_YEAST(383)-sp|P46367|ALDH4_YEAST(404)	21	383	404	14119	9.19654	12007;	File: "Z:\alinden\DATA\2017\06_Jun\170619[Ridhima_TOMTIM]w and wo blocking protein\RAW\TOMTIM-\R_Gomkale_Linden_TOMTIM-_A10b.raw"; ID: "12007"; scans: "14119"	1143.84
no	DSS	442	1442	3499.82	0.00092	0	none	Z:\alinden\DATA\2017\06_Jun\170619[Ridhima_TOMTIM]w and wo blocking protein\RAW\TOMTIM-\R_Gomkale_Linden_TOMTIM-_A10b.raw;	1	Intra	null	1.1e-09	YVDIGKNEGATLITGGER(6)-GYFIKPTVFGDVK(5):0	ALDH4_YEAST	ALDH4_YEAST	sp|P46367|ALDH4_YEAST	sp|P46367|ALDH4_YEAST	sp|P46367|ALDH4_YEAST(383)-sp|P46367|ALDH4_YEAST(404)	21	383	404	14153	8.95861	12038;	File: "Z:\alinden\DATA\2017\06_Jun\170619[Ridhima_TOMTIM]w and wo blocking protein\RAW\TOMTIM-\R_Gomkale_Linden_TOMTIM-_A10b.raw"; ID: "12038"; scans: "14153"	0.262795
no	DSS	443	1443	4042.26	2.0071	0	none	Z:\alinden\DATA\2017\06_Jun\170619[Ridhima_TOMTIM]w and wo blocking protein\RAW\TOMTIM-\R_Gomkale_Linden_TOMTIM-_A10b.raw;	1	Intra	null	5.05e-09	ILKYVDIGKNEGATLITGGER(3)-IVKEEIFGPVVTVTK(3):0	ALDH4_YEAST	ALDH4_YEAST	sp|P46367|ALDH4_YEAST	sp|P46367|ALDH4_YEAST	sp|P46367|ALDH4_YEAST(377)-sp|P46367|ALDH4_YEAST(419)	29	377	419	14155	8.29671	12040;	File: "Z:\alinden\DATA\2017\06_Jun\170619[Ridhima_TOMTIM]w and wo blocking protein\RAW\TOMTIM-\R_Gomkale_Linden_TOMTIM-_A10b.raw"; ID: "12040"; scans: "14155"	496.159
no	DSS	444	1444	3499.82	1.00393	0	none	Z:\alinden\DATA\2017\06_Jun\170619[Ridhima_TOMTIM]w and wo blocking protein\RAW\TOMTIM-\R_Gomkale_Linden_TOMTIM-_A10b.raw;	1	Intra	null	3.58e-13	YVDIGKNEGATLITGGER(6)-GYFIKPTVFGDVK(5):0	ALDH4_YEAST	ALDH4_YEAST	sp|P46367|ALDH4_YEAST	sp|P46367|ALDH4_YEAST	sp|P46367|ALDH4_YEAST(383)-sp|P46367|ALDH4_YEAST(404)	21	383	404	14156	12.4461	12041;	File: "Z:\alinden\DATA\2017\06_Jun\170619[Ridhima_TOMTIM]w and wo blocking protein\RAW\TOMTIM-\R_Gomkale_Linden_TOMTIM-_A10b.raw"; ID: "12041"; scans: "14156"	286.687
no	DSS	445	1445	5423.68	0.00016	0	none	Z:\alinden\DATA\2017\06_Jun\170619[Ridhima_TOMTIM]w and wo blocking protein\RAW\TOMTIM-\R_Gomkale_Linden_TOMTIM-_A10b.raw;	1	Intra	null	5.03e-14	FKSADEVINMANDSEYGLAAGIHTSNINTALK(2)-YVDIGKNEGATLITGGER(6):0	ALDH4_YEAST	ALDH4_YEAST	sp|P46367|ALDH4_YEAST	sp|P46367|ALDH4_YEAST	sp|P46367|ALDH4_YEAST(433)-sp|P46367|ALDH4_YEAST(383)	10	433	383	14177	13.2984	12060;	File: "Z:\alinden\DATA\2017\06_Jun\170619[Ridhima_TOMTIM]w and wo blocking protein\RAW\TOMTIM-\R_Gomkale_Linden_TOMTIM-_A10b.raw"; ID: "12060"; scans: "14177"	0.029495
no	DSS	446	1446	5423.68	2.0023	0	none	Z:\alinden\DATA\2017\06_Jun\170619[Ridhima_TOMTIM]w and wo blocking protein\RAW\TOMTIM-\R_Gomkale_Linden_TOMTIM-_A10b.raw;	1	Intra	null	9.22e-29	FKSADEVINMANDSEYGLAAGIHTSNINTALK(2)-YVDIGKNEGATLITGGER(6):0	ALDH4_YEAST	ALDH4_YEAST	sp|P46367|ALDH4_YEAST	sp|P46367|ALDH4_YEAST	sp|P46367|ALDH4_YEAST(433)-sp|P46367|ALDH4_YEAST(383)	10	433	383	14205	28.0353	12086;	File: "Z:\alinden\DATA\2017\06_Jun\170619[Ridhima_TOMTIM]w and wo blocking protein\RAW\TOMTIM-\R_Gomkale_Linden_TOMTIM-_A10b.raw"; ID: "12086"; scans: "14205"	368.972
no	DSS	447	1447	3499.82	-0.00278	0	none	Z:\alinden\DATA\2017\06_Jun\170619[Ridhima_TOMTIM]w and wo blocking protein\RAW\TOMTIM-\R_Gomkale_Linden_TOMTIM-_A10b.raw;	1	Intra	null	2.14e-09	YVDIGKNEGATLITGGER(6)-GYFIKPTVFGDVK(5):0	ALDH4_YEAST	ALDH4_YEAST	sp|P46367|ALDH4_YEAST	sp|P46367|ALDH4_YEAST	sp|P46367|ALDH4_YEAST(383)-sp|P46367|ALDH4_YEAST(404)	21	383	404	14278	8.66959	12154;	File: "Z:\alinden\DATA\2017\06_Jun\170619[Ridhima_TOMTIM]w and wo blocking protein\RAW\TOMTIM-\R_Gomkale_Linden_TOMTIM-_A10b.raw"; ID: "12154"; scans: "14278"	-0.794098
no	DSS	448	1448	3499.82	2.00824	0	none	Z:\alinden\DATA\2017\06_Jun\170619[Ridhima_TOMTIM]w and wo blocking protein\RAW\TOMTIM-\R_Gomkale_Linden_TOMTIM-_A10b.raw;	1	Intra	null	3.18e-12	YVDIGKNEGATLITGGER(6)-GYFIKPTVFGDVK(5):0	ALDH4_YEAST	ALDH4_YEAST	sp|P46367|ALDH4_YEAST	sp|P46367|ALDH4_YEAST	sp|P46367|ALDH4_YEAST(383)-sp|P46367|ALDH4_YEAST(404)	21	383	404	14302	11.4976	12177;	File: "Z:\alinden\DATA\2017\06_Jun\170619[Ridhima_TOMTIM]w and wo blocking protein\RAW\TOMTIM-\R_Gomkale_Linden_TOMTIM-_A10b.raw"; ID: "12177"; scans: "14302"	573.318
no	DSS	449	1449	3854.09	1.00396	0	none	Z:\alinden\DATA\2017\06_Jun\170619[Ridhima_TOMTIM]w and wo blocking protein\RAW\TOMTIM-\R_Gomkale_Linden_TOMTIM-_A10b.raw;	1	Intra	null	4.67e-10	ILKYVDIGKNEGATLITGGER(3)-GYFIKPTVFGDVK(5):0	ALDH4_YEAST	ALDH4_YEAST	sp|P46367|ALDH4_YEAST	sp|P46367|ALDH4_YEAST	sp|P46367|ALDH4_YEAST(377)-sp|P46367|ALDH4_YEAST(404)	14	377	404	14400	9.33068	12269;	File: "Z:\alinden\DATA\2017\06_Jun\170619[Ridhima_TOMTIM]w and wo blocking protein\RAW\TOMTIM-\R_Gomkale_Linden_TOMTIM-_A10b.raw"; ID: "12269"; scans: "14400"	260.356
no	DSS	450	1450	3854.09	2.00685	0	none	Z:\alinden\DATA\2017\06_Jun\170619[Ridhima_TOMTIM]w and wo blocking protein\RAW\TOMTIM-\R_Gomkale_Linden_TOMTIM-_A10b.raw;	1	Intra	null	5.07e-08	ILKYVDIGKNEGATLITGGER(3)-GYFIKPTVFGDVK(5):0	ALDH4_YEAST	ALDH4_YEAST	sp|P46367|ALDH4_YEAST	sp|P46367|ALDH4_YEAST	sp|P46367|ALDH4_YEAST(377)-sp|P46367|ALDH4_YEAST(404)	14	377	404	14404	7.29499	12273;	File: "Z:\alinden\DATA\2017\06_Jun\170619[Ridhima_TOMTIM]w and wo blocking protein\RAW\TOMTIM-\R_Gomkale_Linden_TOMTIM-_A10b.raw"; ID: "12273"; scans: "14404"	520.3
no	DSS	451	1451	3854.09	0.00294	0	none	Z:\alinden\DATA\2017\06_Jun\170619[Ridhima_TOMTIM]w and wo blocking protein\RAW\TOMTIM-\R_Gomkale_Linden_TOMTIM-_A10b.raw;	1	Intra	null	2.13e-15	ILKYVDIGKNEGATLITGGER(3)-GYFIKPTVFGDVK(5):0	ALDH4_YEAST	ALDH4_YEAST	sp|P46367|ALDH4_YEAST	sp|P46367|ALDH4_YEAST	sp|P46367|ALDH4_YEAST(377)-sp|P46367|ALDH4_YEAST(404)	14	377	404	14412	14.6716	12280;	File: "Z:\alinden\DATA\2017\06_Jun\170619[Ridhima_TOMTIM]w and wo blocking protein\RAW\TOMTIM-\R_Gomkale_Linden_TOMTIM-_A10b.raw"; ID: "12280"; scans: "14412"	0.762627
no	DSS	452	1452	3926.22	-0.00121	0	none	Z:\alinden\DATA\2017\06_Jun\170619[Ridhima_TOMTIM]w and wo blocking protein\RAW\TOMTIM-\R_Gomkale_Linden_TOMTIM-_A10b.raw;	1	Intra	null	4.3e-07	IVKEEIFGPVVTVTKFK(15)-LGSKGYFIKPTVFGDVK(4):0	ALDH4_YEAST	ALDH4_YEAST	sp|P46367|ALDH4_YEAST	sp|P46367|ALDH4_YEAST	sp|P46367|ALDH4_YEAST(431)-sp|P46367|ALDH4_YEAST(399)	11	431	399	14418	6.36653	12286;	File: "Z:\alinden\DATA\2017\06_Jun\170619[Ridhima_TOMTIM]w and wo blocking protein\RAW\TOMTIM-\R_Gomkale_Linden_TOMTIM-_A10b.raw"; ID: "12286"; scans: "14418"	-0.308105
no	DSS	453	1453	3854.09	-0.01645	0	none	Z:\alinden\DATA\2017\06_Jun\170619[Ridhima_TOMTIM]w and wo blocking protein\RAW\TOMTIM-\R_Gomkale_Linden_TOMTIM-_A10b.raw;	1	Intra	null	1.4e-11	ILKYVDIGKNEGATLITGGER(3)-GYFIKPTVFGDVK(5):0	ALDH4_YEAST	ALDH4_YEAST	sp|P46367|ALDH4_YEAST	sp|P46367|ALDH4_YEAST	sp|P46367|ALDH4_YEAST(377)-sp|P46367|ALDH4_YEAST(404)	14	377	404	14426	10.8539	12293;	File: "Z:\alinden\DATA\2017\06_Jun\170619[Ridhima_TOMTIM]w and wo blocking protein\RAW\TOMTIM-\R_Gomkale_Linden_TOMTIM-_A10b.raw"; ID: "12293"; scans: "14426"	-4.2671
no	DSS	454	1454	3499.82	-0.00176	0	none	Z:\alinden\DATA\2017\06_Jun\170619[Ridhima_TOMTIM]w and wo blocking protein\RAW\TOMTIM-\R_Gomkale_Linden_TOMTIM-_A10b.raw;	1	Intra	null	7.89e-08	YVDIGKNEGATLITGGER(6)-GYFIKPTVFGDVK(5):0	ALDH4_YEAST	ALDH4_YEAST	sp|P46367|ALDH4_YEAST	sp|P46367|ALDH4_YEAST	sp|P46367|ALDH4_YEAST(383)-sp|P46367|ALDH4_YEAST(404)	21	383	404	14438	7.10292	12305;	File: "Z:\alinden\DATA\2017\06_Jun\170619[Ridhima_TOMTIM]w and wo blocking protein\RAW\TOMTIM-\R_Gomkale_Linden_TOMTIM-_A10b.raw"; ID: "12305"; scans: "14438"	-0.502738
no	DSS	455	1455	3926.22	0.0029	0	none	Z:\alinden\DATA\2017\06_Jun\170619[Ridhima_TOMTIM]w and wo blocking protein\RAW\TOMTIM-\R_Gomkale_Linden_TOMTIM-_A10b.raw;	1	Intra	null	1.04e-08	IVKEEIFGPVVTVTKFK(15)-LGSKGYFIKPTVFGDVK(4):0	ALDH4_YEAST	ALDH4_YEAST	sp|P46367|ALDH4_YEAST	sp|P46367|ALDH4_YEAST	sp|P46367|ALDH4_YEAST(431)-sp|P46367|ALDH4_YEAST(399)	11	431	399	14484	7.98297	12348;	File: "Z:\alinden\DATA\2017\06_Jun\170619[Ridhima_TOMTIM]w and wo blocking protein\RAW\TOMTIM-\R_Gomkale_Linden_TOMTIM-_A10b.raw"; ID: "12348"; scans: "14484"	0.738434
no	DSS	456	1456	3854.09	3.00219	0	none	Z:\alinden\DATA\2017\06_Jun\170619[Ridhima_TOMTIM]w and wo blocking protein\RAW\TOMTIM-\R_Gomkale_Linden_TOMTIM-_A10b.raw;	1	Intra	null	7.43e-17	ILKYVDIGKNEGATLITGGER(3)-GYFIKPTVFGDVK(5):0	ALDH4_YEAST	ALDH4_YEAST	sp|P46367|ALDH4_YEAST	sp|P46367|ALDH4_YEAST	sp|P46367|ALDH4_YEAST(377)-sp|P46367|ALDH4_YEAST(404)	14	377	404	14550	16.129	12410;	File: "Z:\alinden\DATA\2017\06_Jun\170619[Ridhima_TOMTIM]w and wo blocking protein\RAW\TOMTIM-\R_Gomkale_Linden_TOMTIM-_A10b.raw"; ID: "12410"; scans: "14550"	778.153
no	DSS	457	1457	3926.22	4.00805	0	none	Z:\alinden\DATA\2017\06_Jun\170619[Ridhima_TOMTIM]w and wo blocking protein\RAW\TOMTIM-\R_Gomkale_Linden_TOMTIM-_A10b.raw;	1	Intra	null	6.47e-07	IVKEEIFGPVVTVTKFK(15)-LGSKGYFIKPTVFGDVK(4):0	ALDH4_YEAST	ALDH4_YEAST	sp|P46367|ALDH4_YEAST	sp|P46367|ALDH4_YEAST	sp|P46367|ALDH4_YEAST(431)-sp|P46367|ALDH4_YEAST(399)	11	431	399	14556	6.1891	12416;	File: "Z:\alinden\DATA\2017\06_Jun\170619[Ridhima_TOMTIM]w and wo blocking protein\RAW\TOMTIM-\R_Gomkale_Linden_TOMTIM-_A10b.raw"; ID: "12416"; scans: "14556"	1019.54
no	DSS	458	1458	3926.22	0.00173	0	none	Z:\alinden\DATA\2017\06_Jun\170619[Ridhima_TOMTIM]w and wo blocking protein\RAW\TOMTIM-\R_Gomkale_Linden_TOMTIM-_A10b.raw;	1	Intra	null	1.16e-06	IVKEEIFGPVVTVTKFK(15)-LGSKGYFIKPTVFGDVK(4):0	ALDH4_YEAST	ALDH4_YEAST	sp|P46367|ALDH4_YEAST	sp|P46367|ALDH4_YEAST	sp|P46367|ALDH4_YEAST(431)-sp|P46367|ALDH4_YEAST(399)	11	431	399	14655	5.93554	12509;	File: "Z:\alinden\DATA\2017\06_Jun\170619[Ridhima_TOMTIM]w and wo blocking protein\RAW\TOMTIM-\R_Gomkale_Linden_TOMTIM-_A10b.raw"; ID: "12509"; scans: "14655"	0.440514
no	DSS	459	1459	3651.06	0.00323	0	none	Z:\alinden\DATA\2017\06_Jun\170619[Ridhima_TOMTIM]w and wo blocking protein\RAW\TOMTIM-\R_Gomkale_Linden_TOMTIM-_A10b.raw;	1	Intra	null	5.41e-11	LGSKGYFIKPTVFGDVK(4)-IVKEEIFGPVVTVTK(3):0	ALDH4_YEAST	ALDH4_YEAST	sp|P46367|ALDH4_YEAST	sp|P46367|ALDH4_YEAST	sp|P46367|ALDH4_YEAST(399)-sp|P46367|ALDH4_YEAST(419)	26	399	419	14712	10.2668	12563;	File: "Z:\alinden\DATA\2017\06_Jun\170619[Ridhima_TOMTIM]w and wo blocking protein\RAW\TOMTIM-\R_Gomkale_Linden_TOMTIM-_A10b.raw"; ID: "12563"; scans: "14712"	0.88443
no	DSS	460	1460	3651.06	0.00452	0	none	Z:\alinden\DATA\2017\06_Jun\170619[Ridhima_TOMTIM]w and wo blocking protein\RAW\TOMTIM-\R_Gomkale_Linden_TOMTIM-_A10b.raw;	1	Intra	null	1.51e-10	LGSKGYFIKPTVFGDVK(4)-IVKEEIFGPVVTVTK(3):0	ALDH4_YEAST	ALDH4_YEAST	sp|P46367|ALDH4_YEAST	sp|P46367|ALDH4_YEAST	sp|P46367|ALDH4_YEAST(399)-sp|P46367|ALDH4_YEAST(419)	26	399	419	14716	9.82102	12566;	File: "Z:\alinden\DATA\2017\06_Jun\170619[Ridhima_TOMTIM]w and wo blocking protein\RAW\TOMTIM-\R_Gomkale_Linden_TOMTIM-_A10b.raw"; ID: "12566"; scans: "14716"	1.23765
no	DSS	461	1461	3651.06	0.00356	0	none	Z:\alinden\DATA\2017\06_Jun\170619[Ridhima_TOMTIM]w and wo blocking protein\RAW\TOMTIM-\R_Gomkale_Linden_TOMTIM-_A10b.raw;	1	Intra	null	5.86e-13	LGSKGYFIKPTVFGDVK(4)-IVKEEIFGPVVTVTK(3):0	ALDH4_YEAST	ALDH4_YEAST	sp|P46367|ALDH4_YEAST	sp|P46367|ALDH4_YEAST	sp|P46367|ALDH4_YEAST(399)-sp|P46367|ALDH4_YEAST(419)	26	399	419	14719	12.2321	12569;	File: "Z:\alinden\DATA\2017\06_Jun\170619[Ridhima_TOMTIM]w and wo blocking protein\RAW\TOMTIM-\R_Gomkale_Linden_TOMTIM-_A10b.raw"; ID: "12569"; scans: "14719"	0.97479
no	DSS	462	1462	3651.06	-0.00017	0	none	Z:\alinden\DATA\2017\06_Jun\170619[Ridhima_TOMTIM]w and wo blocking protein\RAW\TOMTIM-\R_Gomkale_Linden_TOMTIM-_A10b.raw;	1	Intra	null	4.61e-14	LGSKGYFIKPTVFGDVK(4)-IVKEEIFGPVVTVTK(3):0	ALDH4_YEAST	ALDH4_YEAST	sp|P46367|ALDH4_YEAST	sp|P46367|ALDH4_YEAST	sp|P46367|ALDH4_YEAST(399)-sp|P46367|ALDH4_YEAST(419)	26	399	419	14840	13.3363	12683;	File: "Z:\alinden\DATA\2017\06_Jun\170619[Ridhima_TOMTIM]w and wo blocking protein\RAW\TOMTIM-\R_Gomkale_Linden_TOMTIM-_A10b.raw"; ID: "12683"; scans: "14840"	-0.046549
no	DSS	463	1463	3651.06	-0.00313	0	none	Z:\alinden\DATA\2017\06_Jun\170619[Ridhima_TOMTIM]w and wo blocking protein\RAW\TOMTIM-\R_Gomkale_Linden_TOMTIM-_A10b.raw;	1	Intra	null	1.97e-10	LGSKGYFIKPTVFGDVK(4)-IVKEEIFGPVVTVTK(3):0	ALDH4_YEAST	ALDH4_YEAST	sp|P46367|ALDH4_YEAST	sp|P46367|ALDH4_YEAST	sp|P46367|ALDH4_YEAST(399)-sp|P46367|ALDH4_YEAST(419)	26	399	419	14870	9.70553	12711;	File: "Z:\alinden\DATA\2017\06_Jun\170619[Ridhima_TOMTIM]w and wo blocking protein\RAW\TOMTIM-\R_Gomkale_Linden_TOMTIM-_A10b.raw"; ID: "12711"; scans: "14870"	-0.85705
no	DSS	464	1464	4811.4	0.0195	0	none	Z:\alinden\DATA\2017\06_Jun\170619[Ridhima_TOMTIM]w and wo blocking protein\RAW\TOMTIM-\R_Gomkale_Linden_TOMTIM-_A10b.raw;	1	Intra	null	1.45e-12	VGDPFDESTFQGAQTSQMQLNKILK(22)-YVDIGKNEGATLITGGER(6):0	ALDH4_YEAST	ALDH4_YEAST	sp|P46367|ALDH4_YEAST	sp|P46367|ALDH4_YEAST	sp|P46367|ALDH4_YEAST(374)-sp|P46367|ALDH4_YEAST(383)	17	374	383	14926	11.8386	12764;	File: "Z:\alinden\DATA\2017\06_Jun\170619[Ridhima_TOMTIM]w and wo blocking protein\RAW\TOMTIM-\R_Gomkale_Linden_TOMTIM-_A10b.raw"; ID: "12764"; scans: "14926"	4.05201
no	DSS	465	1465	3651.06	-0.00157	0	none	Z:\alinden\DATA\2017\06_Jun\170619[Ridhima_TOMTIM]w and wo blocking protein\RAW\TOMTIM-\R_Gomkale_Linden_TOMTIM-_A10b.raw;	1	Intra	null	5.28e-13	LGSKGYFIKPTVFGDVK(4)-IVKEEIFGPVVTVTK(3):0	ALDH4_YEAST	ALDH4_YEAST	sp|P46367|ALDH4_YEAST	sp|P46367|ALDH4_YEAST	sp|P46367|ALDH4_YEAST(399)-sp|P46367|ALDH4_YEAST(419)	26	399	419	14932	12.2774	12770;	File: "Z:\alinden\DATA\2017\06_Jun\170619[Ridhima_TOMTIM]w and wo blocking protein\RAW\TOMTIM-\R_Gomkale_Linden_TOMTIM-_A10b.raw"; ID: "12770"; scans: "14932"	-0.429894
no	DSS	466	1466	4811.4	0.99506	0	none	Z:\alinden\DATA\2017\06_Jun\170619[Ridhima_TOMTIM]w and wo blocking protein\RAW\TOMTIM-\R_Gomkale_Linden_TOMTIM-_A10b.raw;	1	Intra	null	2.06e-08	VGDPFDESTFQGAQTSQMQLNKILK(22)-YVDIGKNEGATLITGGER(6):0	ALDH4_YEAST	ALDH4_YEAST	sp|P46367|ALDH4_YEAST	sp|P46367|ALDH4_YEAST	sp|P46367|ALDH4_YEAST(374)-sp|P46367|ALDH4_YEAST(383)	17	374	383	15130	7.68613	12957;	File: "Z:\alinden\DATA\2017\06_Jun\170619[Ridhima_TOMTIM]w and wo blocking protein\RAW\TOMTIM-\R_Gomkale_Linden_TOMTIM-_A10b.raw"; ID: "12957"; scans: "15130"	206.727
no	DSS	467	1467	4909.49	1.00371	0	none	Z:\alinden\DATA\2017\06_Jun\170619[Ridhima_TOMTIM]w and wo blocking protein\RAW\TOMTIM-\R_Gomkale_Linden_TOMTIM-_A10b.raw;	1	Intra	null	1.07e-11	AASESIKVGDPFDESTFQGAQTSQMQLNK(7)-IVKEEIFGPVVTVTK(3):0	ALDH4_YEAST	ALDH4_YEAST	sp|P46367|ALDH4_YEAST	sp|P46367|ALDH4_YEAST	sp|P46367|ALDH4_YEAST(352)-sp|P46367|ALDH4_YEAST(419)	3	352	419	15192	10.9706	13015;	File: "Z:\alinden\DATA\2017\06_Jun\170619[Ridhima_TOMTIM]w and wo blocking protein\RAW\TOMTIM-\R_Gomkale_Linden_TOMTIM-_A10b.raw"; ID: "13015"; scans: "15192"	204.359
no	DSS	468	1468	4721.32	0.01127	0	none	Z:\alinden\DATA\2017\06_Jun\170619[Ridhima_TOMTIM]w and wo blocking protein\RAW\TOMTIM-\R_Gomkale_Linden_TOMTIM-_A10b.raw;	1	Intra	null	3.74e-10	AASESIKVGDPFDESTFQGAQTSQMQLNK(7)-GYFIKPTVFGDVK(5):0	ALDH4_YEAST	ALDH4_YEAST	sp|P46367|ALDH4_YEAST	sp|P46367|ALDH4_YEAST	sp|P46367|ALDH4_YEAST(352)-sp|P46367|ALDH4_YEAST(404)	14	352	404	15385	9.42713	13198;	File: "Z:\alinden\DATA\2017\06_Jun\170619[Ridhima_TOMTIM]w and wo blocking protein\RAW\TOMTIM-\R_Gomkale_Linden_TOMTIM-_A10b.raw"; ID: "13198"; scans: "15385"	2.38653
no	DSS	469	1469	4072.2	0.01068	0	none	Z:\alinden\DATA\2017\06_Jun\170619[Ridhima_TOMTIM]w and wo blocking protein\RAW\TOMTIM-\R_Gomkale_Linden_TOMTIM-_A10b.raw;	1	Intra	null	2.99e-08	GYFIKPTVFGDVKEDMR(13)-IVKEEIFGPVVTVTKFK(15):0	ALDH4_YEAST	ALDH4_YEAST	sp|P46367|ALDH4_YEAST	sp|P46367|ALDH4_YEAST	sp|P46367|ALDH4_YEAST(412)-sp|P46367|ALDH4_YEAST(431)	18	412	431	15411	7.52433	13222;	File: "Z:\alinden\DATA\2017\06_Jun\170619[Ridhima_TOMTIM]w and wo blocking protein\RAW\TOMTIM-\R_Gomkale_Linden_TOMTIM-_A10b.raw"; ID: "13222"; scans: "15411"	2.62201
no	DSS	470	1470	3576.77	1.01093	0	none	Z:\alinden\DATA\2017\06_Jun\170619[Ridhima_TOMTIM]w and wo blocking protein\RAW\TOMTIM-\R_Gomkale_Linden_TOMTIM-_A10b.raw;	1	Intra	null	1.54e-05	TPTDDANAAVGGQDTTKPKELSLK(19)-MSWLFGDK(1):0	TIM23_YEAST	TIM23_YEAST	sp|P32897|TIM23_YEAST	sp|P32897|TIM23_YEAST	sp|P32897|TIM23_YEAST(27)-sp|P32897|TIM23_YEAST(1)	1	27	1	15433	4.81248	13243;	File: "Z:\alinden\DATA\2017\06_Jun\170619[Ridhima_TOMTIM]w and wo blocking protein\RAW\TOMTIM-\R_Gomkale_Linden_TOMTIM-_A10b.raw"; ID: "13243"; scans: "15433"	282.479
no	DSS	471	1471	4072.2	0.00568	0	none	Z:\alinden\DATA\2017\06_Jun\170619[Ridhima_TOMTIM]w and wo blocking protein\RAW\TOMTIM-\R_Gomkale_Linden_TOMTIM-_A10b.raw;	1	Intra	null	3.14e-10	GYFIKPTVFGDVKEDMR(13)-IVKEEIFGPVVTVTKFK(15):0	ALDH4_YEAST	ALDH4_YEAST	sp|P46367|ALDH4_YEAST	sp|P46367|ALDH4_YEAST	sp|P46367|ALDH4_YEAST(412)-sp|P46367|ALDH4_YEAST(431)	18	412	431	15436	9.50307	13246;	File: "Z:\alinden\DATA\2017\06_Jun\170619[Ridhima_TOMTIM]w and wo blocking protein\RAW\TOMTIM-\R_Gomkale_Linden_TOMTIM-_A10b.raw"; ID: "13246"; scans: "15436"	1.39448
no	DSS	472	1472	3364.89	1.98763	0	none	Z:\alinden\DATA\2017\06_Jun\170619[Ridhima_TOMTIM]w and wo blocking protein\RAW\TOMTIM-\R_Gomkale_Linden_TOMTIM-_A10b.raw;	1	Inter	null	0.000506	LDKIFTPINLNQSHWALGIIDLK(3)-LKYR(1):0	ULP1_YEAST	SYPM_YEAST	sp|Q02724|ULP1_YEAST	sp|P39965|SYPM_YEAST	sp|Q02724|ULP1_YEAST(503)-sp|P39965|SYPM_YEAST(2)	1	503	2	15439	3.29585	13249;	File: "Z:\alinden\DATA\2017\06_Jun\170619[Ridhima_TOMTIM]w and wo blocking protein\RAW\TOMTIM-\R_Gomkale_Linden_TOMTIM-_A10b.raw"; ID: "13249"; scans: "15439"	590.171
no	DSS	473	1473	4072.2	0.00709	0	none	Z:\alinden\DATA\2017\06_Jun\170619[Ridhima_TOMTIM]w and wo blocking protein\RAW\TOMTIM-\R_Gomkale_Linden_TOMTIM-_A10b.raw;	1	Intra	null	3.27e-11	GYFIKPTVFGDVKEDMR(13)-IVKEEIFGPVVTVTKFK(15):0	ALDH4_YEAST	ALDH4_YEAST	sp|P46367|ALDH4_YEAST	sp|P46367|ALDH4_YEAST	sp|P46367|ALDH4_YEAST(412)-sp|P46367|ALDH4_YEAST(431)	18	412	431	15522	10.4855	13327;	File: "Z:\alinden\DATA\2017\06_Jun\170619[Ridhima_TOMTIM]w and wo blocking protein\RAW\TOMTIM-\R_Gomkale_Linden_TOMTIM-_A10b.raw"; ID: "13327"; scans: "15522"	1.74064
no	DSS	474	1474	5532.72	3.01798	0	none	Z:\alinden\DATA\2017\06_Jun\170619[Ridhima_TOMTIM]w and wo blocking protein\RAW\TOMTIM-\R_Gomkale_Linden_TOMTIM-_A10b.raw;	1	Intra	null	2.19e-10	FKSADEVINMANDSEYGLAAGIHTSNINTALK(2)-GYFIKPTVFGDVKEDMR(13):0	ALDH4_YEAST	ALDH4_YEAST	sp|P46367|ALDH4_YEAST	sp|P46367|ALDH4_YEAST	sp|P46367|ALDH4_YEAST(433)-sp|P46367|ALDH4_YEAST(412)	12	433	412	15524	9.65956	13329;	File: "Z:\alinden\DATA\2017\06_Jun\170619[Ridhima_TOMTIM]w and wo blocking protein\RAW\TOMTIM-\R_Gomkale_Linden_TOMTIM-_A10b.raw"; ID: "13329"; scans: "15524"	545.082
no	DSS	475	1475	4811.4	0.0029	0	none	Z:\alinden\DATA\2017\06_Jun\170619[Ridhima_TOMTIM]w and wo blocking protein\RAW\TOMTIM-\R_Gomkale_Linden_TOMTIM-_A10b.raw;	1	Intra	null	3.23e-15	VGDPFDESTFQGAQTSQMQLNKILK(22)-YVDIGKNEGATLITGGER(6):0	ALDH4_YEAST	ALDH4_YEAST	sp|P46367|ALDH4_YEAST	sp|P46367|ALDH4_YEAST	sp|P46367|ALDH4_YEAST(374)-sp|P46367|ALDH4_YEAST(383)	17	374	383	15538	14.4908	13342;	File: "Z:\alinden\DATA\2017\06_Jun\170619[Ridhima_TOMTIM]w and wo blocking protein\RAW\TOMTIM-\R_Gomkale_Linden_TOMTIM-_A10b.raw"; ID: "13342"; scans: "15538"	0.602609
no	DSS	476	1476	5532.72	2.01503	0	none	Z:\alinden\DATA\2017\06_Jun\170619[Ridhima_TOMTIM]w and wo blocking protein\RAW\TOMTIM-\R_Gomkale_Linden_TOMTIM-_A10b.raw;	1	Intra	null	4.78e-13	FKSADEVINMANDSEYGLAAGIHTSNINTALK(2)-GYFIKPTVFGDVKEDMR(13):0	ALDH4_YEAST	ALDH4_YEAST	sp|P46367|ALDH4_YEAST	sp|P46367|ALDH4_YEAST	sp|P46367|ALDH4_YEAST(433)-sp|P46367|ALDH4_YEAST(412)	12	433	412	15543	12.3206	13347;	File: "Z:\alinden\DATA\2017\06_Jun\170619[Ridhima_TOMTIM]w and wo blocking protein\RAW\TOMTIM-\R_Gomkale_Linden_TOMTIM-_A10b.raw"; ID: "13347"; scans: "15543"	364.003
no	DSS	477	1477	4721.32	1.01519	0	none	Z:\alinden\DATA\2017\06_Jun\170619[Ridhima_TOMTIM]w and wo blocking protein\RAW\TOMTIM-\R_Gomkale_Linden_TOMTIM-_A10b.raw;	1	Intra	null	9.4e-11	AASESIKVGDPFDESTFQGAQTSQMQLNK(7)-GYFIKPTVFGDVK(5):0	ALDH4_YEAST	ALDH4_YEAST	sp|P46367|ALDH4_YEAST	sp|P46367|ALDH4_YEAST	sp|P46367|ALDH4_YEAST(352)-sp|P46367|ALDH4_YEAST(404)	14	352	404	15571	10.0269	13373;	File: "Z:\alinden\DATA\2017\06_Jun\170619[Ridhima_TOMTIM]w and wo blocking protein\RAW\TOMTIM-\R_Gomkale_Linden_TOMTIM-_A10b.raw"; ID: "13373"; scans: "15571"	214.93
no	DSS	478	1478	4774.46	3.01977	0	none	Z:\alinden\DATA\2017\06_Jun\170619[Ridhima_TOMTIM]w and wo blocking protein\RAW\TOMTIM-\R_Gomkale_Linden_TOMTIM-_A10b.raw;	1	Intra	null	1.06e-09	VGDPFDESTFQGAQTSQMQLNKILK(22)-LGSKGYFIKPTVFGDVK(4):0	ALDH4_YEAST	ALDH4_YEAST	sp|P46367|ALDH4_YEAST	sp|P46367|ALDH4_YEAST	sp|P46367|ALDH4_YEAST(374)-sp|P46367|ALDH4_YEAST(399)	8	374	399	15580	8.97469	13382;	File: "Z:\alinden\DATA\2017\06_Jun\170619[Ridhima_TOMTIM]w and wo blocking protein\RAW\TOMTIM-\R_Gomkale_Linden_TOMTIM-_A10b.raw"; ID: "13382"; scans: "15580"	631.952
no	DSS	479	1479	5532.72	0.01018	0	none	Z:\alinden\DATA\2017\06_Jun\170619[Ridhima_TOMTIM]w and wo blocking protein\RAW\TOMTIM-\R_Gomkale_Linden_TOMTIM-_A10b.raw;	1	Intra	null	2.31e-12	FKSADEVINMANDSEYGLAAGIHTSNINTALK(2)-GYFIKPTVFGDVKEDMR(13):0	ALDH4_YEAST	ALDH4_YEAST	sp|P46367|ALDH4_YEAST	sp|P46367|ALDH4_YEAST	sp|P46367|ALDH4_YEAST(433)-sp|P46367|ALDH4_YEAST(412)	12	433	412	15583	11.6364	13385;	File: "Z:\alinden\DATA\2017\06_Jun\170619[Ridhima_TOMTIM]w and wo blocking protein\RAW\TOMTIM-\R_Gomkale_Linden_TOMTIM-_A10b.raw"; ID: "13385"; scans: "15583"	1.83962
no	DSS	480	1480	2860.69	2.984	0	none	Z:\alinden\DATA\2017\06_Jun\170619[Ridhima_TOMTIM]w and wo blocking protein\RAW\TOMTIM-\R_Gomkale_Linden_TOMTIM-_A10b.raw;	1	Inter	null	0.000328	EKTVVGRSIQSLK(2)-VIVVHKSTIQR(6):0	TIM44_YEAST	IDH2_YEAST	sp|Q01852|TIM44_YEAST	sp|P28241|IDH2_YEAST	sp|Q01852|TIM44_YEAST(228)-sp|P28241|IDH2_YEAST(204)	2	228	204	15587	3.48413	13388;	File: "Z:\alinden\DATA\2017\06_Jun\170619[Ridhima_TOMTIM]w and wo blocking protein\RAW\TOMTIM-\R_Gomkale_Linden_TOMTIM-_A10b.raw"; ID: "13388"; scans: "15587"	1041.65
no	DSS	481	1481	4721.32	2.01127	0	none	Z:\alinden\DATA\2017\06_Jun\170619[Ridhima_TOMTIM]w and wo blocking protein\RAW\TOMTIM-\R_Gomkale_Linden_TOMTIM-_A10b.raw;	1	Intra	null	1.2e-12	AASESIKVGDPFDESTFQGAQTSQMQLNK(7)-GYFIKPTVFGDVK(5):0	ALDH4_YEAST	ALDH4_YEAST	sp|P46367|ALDH4_YEAST	sp|P46367|ALDH4_YEAST	sp|P46367|ALDH4_YEAST(352)-sp|P46367|ALDH4_YEAST(404)	14	352	404	15703	11.9208	13498;	File: "Z:\alinden\DATA\2017\06_Jun\170619[Ridhima_TOMTIM]w and wo blocking protein\RAW\TOMTIM-\R_Gomkale_Linden_TOMTIM-_A10b.raw"; ID: "13498"; scans: "15703"	425.725
no	DSS	482	1482	3797.04	0.00825	0	none	Z:\alinden\DATA\2017\06_Jun\170619[Ridhima_TOMTIM]w and wo blocking protein\RAW\TOMTIM-\R_Gomkale_Linden_TOMTIM-_A10b.raw;	1	Intra	null	2.57e-11	GYFIKPTVFGDVKEDMR(13)-IVKEEIFGPVVTVTK(3):0	ALDH4_YEAST	ALDH4_YEAST	sp|P46367|ALDH4_YEAST	sp|P46367|ALDH4_YEAST	sp|P46367|ALDH4_YEAST(412)-sp|P46367|ALDH4_YEAST(419)	20	412	419	15833	10.5901	13620;	File: "Z:\alinden\DATA\2017\06_Jun\170619[Ridhima_TOMTIM]w and wo blocking protein\RAW\TOMTIM-\R_Gomkale_Linden_TOMTIM-_A10b.raw"; ID: "13620"; scans: "15833"	2.17217
no	DSS	483	1483	3797.04	0.00215	0	none	Z:\alinden\DATA\2017\06_Jun\170619[Ridhima_TOMTIM]w and wo blocking protein\RAW\TOMTIM-\R_Gomkale_Linden_TOMTIM-_A10b.raw;	1	Intra	null	1.25e-07	GYFIKPTVFGDVKEDMR(13)-IVKEEIFGPVVTVTK(3):0	ALDH4_YEAST	ALDH4_YEAST	sp|P46367|ALDH4_YEAST	sp|P46367|ALDH4_YEAST	sp|P46367|ALDH4_YEAST(412)-sp|P46367|ALDH4_YEAST(419)	20	412	419	15873	6.90309	13658;	File: "Z:\alinden\DATA\2017\06_Jun\170619[Ridhima_TOMTIM]w and wo blocking protein\RAW\TOMTIM-\R_Gomkale_Linden_TOMTIM-_A10b.raw"; ID: "13658"; scans: "15873"	0.566081
no	DSS	484	1484	3797.04	0.00503	0	none	Z:\alinden\DATA\2017\06_Jun\170619[Ridhima_TOMTIM]w and wo blocking protein\RAW\TOMTIM-\R_Gomkale_Linden_TOMTIM-_A10b.raw;	1	Intra	null	4.16e-19	GYFIKPTVFGDVKEDMR(13)-IVKEEIFGPVVTVTK(3):0	ALDH4_YEAST	ALDH4_YEAST	sp|P46367|ALDH4_YEAST	sp|P46367|ALDH4_YEAST	sp|P46367|ALDH4_YEAST(412)-sp|P46367|ALDH4_YEAST(419)	20	412	419	15876	18.3809	13661;	File: "Z:\alinden\DATA\2017\06_Jun\170619[Ridhima_TOMTIM]w and wo blocking protein\RAW\TOMTIM-\R_Gomkale_Linden_TOMTIM-_A10b.raw"; ID: "13661"; scans: "15876"	1.32436
no	DSS	485	1485	3797.04	0.00533	0	none	Z:\alinden\DATA\2017\06_Jun\170619[Ridhima_TOMTIM]w and wo blocking protein\RAW\TOMTIM-\R_Gomkale_Linden_TOMTIM-_A10b.raw;	1	Intra	null	3.5e-15	GYFIKPTVFGDVKEDMR(13)-IVKEEIFGPVVTVTK(3):0	ALDH4_YEAST	ALDH4_YEAST	sp|P46367|ALDH4_YEAST	sp|P46367|ALDH4_YEAST	sp|P46367|ALDH4_YEAST(412)-sp|P46367|ALDH4_YEAST(419)	20	412	419	15984	14.4559	13763;	File: "Z:\alinden\DATA\2017\06_Jun\170619[Ridhima_TOMTIM]w and wo blocking protein\RAW\TOMTIM-\R_Gomkale_Linden_TOMTIM-_A10b.raw"; ID: "13763"; scans: "15984"	1.40335
no	DSS	486	1486	3797.04	0.00761	0	none	Z:\alinden\DATA\2017\06_Jun\170619[Ridhima_TOMTIM]w and wo blocking protein\RAW\TOMTIM-\R_Gomkale_Linden_TOMTIM-_A10b.raw;	1	Intra	null	2.78e-14	GYFIKPTVFGDVKEDMR(13)-IVKEEIFGPVVTVTK(3):0	ALDH4_YEAST	ALDH4_YEAST	sp|P46367|ALDH4_YEAST	sp|P46367|ALDH4_YEAST	sp|P46367|ALDH4_YEAST(412)-sp|P46367|ALDH4_YEAST(419)	20	412	419	16007	13.556	13784;	File: "Z:\alinden\DATA\2017\06_Jun\170619[Ridhima_TOMTIM]w and wo blocking protein\RAW\TOMTIM-\R_Gomkale_Linden_TOMTIM-_A10b.raw"; ID: "13784"; scans: "16007"	2.00366
no	DSS	487	1487	4109.11	0.99186	0	none	Z:\alinden\DATA\2017\06_Jun\170619[Ridhima_TOMTIM]w and wo blocking protein\RAW\TOMTIM-\R_Gomkale_Linden_TOMTIM-_A10b.raw;	1	Intra	null	7.72e-07	AVLEGKYDNIPEHAFYMVGGIEDVVAK(6)-LKDTVASFK(2):0	ATPB_YEAST	ATPB_YEAST	sp|P00830|ATPB_YEAST	sp|P00830|ATPB_YEAST	sp|P00830|ATPB_YEAST(481)-sp|P00830|ATPB_YEAST(468)	5	481	468	16099	6.11238	13871;	File: "Z:\alinden\DATA\2017\06_Jun\170619[Ridhima_TOMTIM]w and wo blocking protein\RAW\TOMTIM-\R_Gomkale_Linden_TOMTIM-_A10b.raw"; ID: "13871"; scans: "16099"	241.264
no	DSS	488	1488	3797.04	-0.00305	0	none	Z:\alinden\DATA\2017\06_Jun\170619[Ridhima_TOMTIM]w and wo blocking protein\RAW\TOMTIM-\R_Gomkale_Linden_TOMTIM-_A10b.raw;	1	Intra	null	2.48e-10	GYFIKPTVFGDVKEDMR(5)-IVKEEIFGPVVTVTK(3):0	ALDH4_YEAST	ALDH4_YEAST	sp|P46367|ALDH4_YEAST	sp|P46367|ALDH4_YEAST	sp|P46367|ALDH4_YEAST(404)-sp|P46367|ALDH4_YEAST(419)	9	404	419	16131	9.60555	13901;	File: "Z:\alinden\DATA\2017\06_Jun\170619[Ridhima_TOMTIM]w and wo blocking protein\RAW\TOMTIM-\R_Gomkale_Linden_TOMTIM-_A10b.raw"; ID: "13901"; scans: "16131"	-0.803046
no	DSS	489	1489	3797.04	2.01337	0	none	Z:\alinden\DATA\2017\06_Jun\170619[Ridhima_TOMTIM]w and wo blocking protein\RAW\TOMTIM-\R_Gomkale_Linden_TOMTIM-_A10b.raw;	1	Intra	null	2.69e-11	GYFIKPTVFGDVKEDMR(5)-IVKEEIFGPVVTVTK(3):0	ALDH4_YEAST	ALDH4_YEAST	sp|P46367|ALDH4_YEAST	sp|P46367|ALDH4_YEAST	sp|P46367|ALDH4_YEAST(404)-sp|P46367|ALDH4_YEAST(419)	9	404	419	16142	10.5702	13912;	File: "Z:\alinden\DATA\2017\06_Jun\170619[Ridhima_TOMTIM]w and wo blocking protein\RAW\TOMTIM-\R_Gomkale_Linden_TOMTIM-_A10b.raw"; ID: "13912"; scans: "16142"	529.826
no	DSS	490	1490	4109.11	2.01421	0	none	Z:\alinden\DATA\2017\06_Jun\170619[Ridhima_TOMTIM]w and wo blocking protein\RAW\TOMTIM-\R_Gomkale_Linden_TOMTIM-_A10b.raw;	1	Intra	null	1.34e-08	AVLEGKYDNIPEHAFYMVGGIEDVVAK(6)-LKDTVASFK(2):0	ATPB_YEAST	ATPB_YEAST	sp|P00830|ATPB_YEAST	sp|P00830|ATPB_YEAST	sp|P00830|ATPB_YEAST(481)-sp|P00830|ATPB_YEAST(468)	5	481	468	16164	7.8729	13933;	File: "Z:\alinden\DATA\2017\06_Jun\170619[Ridhima_TOMTIM]w and wo blocking protein\RAW\TOMTIM-\R_Gomkale_Linden_TOMTIM-_A10b.raw"; ID: "13933"; scans: "16164"	489.822
no	DSS	491	1491	3797.04	0.99785	0	none	Z:\alinden\DATA\2017\06_Jun\170619[Ridhima_TOMTIM]w and wo blocking protein\RAW\TOMTIM-\R_Gomkale_Linden_TOMTIM-_A10b.raw;	1	Intra	null	1.52e-16	GYFIKPTVFGDVKEDMR(5)-IVKEEIFGPVVTVTK(3):0	ALDH4_YEAST	ALDH4_YEAST	sp|P46367|ALDH4_YEAST	sp|P46367|ALDH4_YEAST	sp|P46367|ALDH4_YEAST(404)-sp|P46367|ALDH4_YEAST(419)	9	404	419	16171	15.8182	13939;	File: "Z:\alinden\DATA\2017\06_Jun\170619[Ridhima_TOMTIM]w and wo blocking protein\RAW\TOMTIM-\R_Gomkale_Linden_TOMTIM-_A10b.raw"; ID: "13939"; scans: "16171"	262.658
no	DSS	492	1492	3713.88	1.00359	0	none	Z:\alinden\DATA\2017\06_Jun\170619[Ridhima_TOMTIM]w and wo blocking protein\RAW\TOMTIM-\R_Gomkale_Linden_TOMTIM-_A10b.raw;	1	Intra	null	6.43e-12	DKIDLLFEENNFKPFK(13)-NFDKMAQIPNFQK(4):0	NDI1_YEAST	NDI1_YEAST	sp|P32340|NDI1_YEAST	sp|P32340|NDI1_YEAST	sp|P32340|NDI1_YEAST(437)-sp|P32340|NDI1_YEAST(409)	8	437	409	16257	11.1918	14020;	File: "Z:\alinden\DATA\2017\06_Jun\170619[Ridhima_TOMTIM]w and wo blocking protein\RAW\TOMTIM-\R_Gomkale_Linden_TOMTIM-_A10b.raw"; ID: "14020"; scans: "16257"	270.081
no	DSS	493	1493	3713.88	1.01255	0	none	Z:\alinden\DATA\2017\06_Jun\170619[Ridhima_TOMTIM]w and wo blocking protein\RAW\TOMTIM-\R_Gomkale_Linden_TOMTIM-_A10b.raw;	1	Intra	null	1.55e-13	DKIDLLFEENNFKPFK(13)-NFDKMAQIPNFQK(4):0	NDI1_YEAST	NDI1_YEAST	sp|P32340|NDI1_YEAST	sp|P32340|NDI1_YEAST	sp|P32340|NDI1_YEAST(437)-sp|P32340|NDI1_YEAST(409)	8	437	409	16265	12.8097	14028;	File: "Z:\alinden\DATA\2017\06_Jun\170619[Ridhima_TOMTIM]w and wo blocking protein\RAW\TOMTIM-\R_Gomkale_Linden_TOMTIM-_A10b.raw"; ID: "14028"; scans: "16265"	272.491
no	DSS	494	1494	6182.04	2.02399	0	none	Z:\alinden\DATA\2017\06_Jun\170619[Ridhima_TOMTIM]w and wo blocking protein\RAW\TOMTIM-\R_Gomkale_Linden_TOMTIM-_A10b.raw;	1	Intra	null	1.44e-11	ELSLKQSLGFEPNINNIISGPGGMHVDTAR(5)-MSWLFGDKTPTDDANAAVGGQDTTKPK(25):0	TIM23_YEAST	TIM23_YEAST	sp|P32897|TIM23_YEAST	sp|P32897|TIM23_YEAST	sp|P32897|TIM23_YEAST(32)-sp|P32897|TIM23_YEAST(25)	14	32	25	16389	10.8416	14144;	File: "Z:\alinden\DATA\2017\06_Jun\170619[Ridhima_TOMTIM]w and wo blocking protein\RAW\TOMTIM-\R_Gomkale_Linden_TOMTIM-_A10b.raw"; ID: "14144"; scans: "16389"	327.238
no	DSS	495	1495	4593.39	1.00305	0	none	Z:\alinden\DATA\2017\06_Jun\170619[Ridhima_TOMTIM]w and wo blocking protein\RAW\TOMTIM-\R_Gomkale_Linden_TOMTIM-_A10b.raw;	1	Intra	18,M(Oxidation[M]);	2.06e-08	VGDPFDESTFQGAQTSQMQLNKILK(22)-IVKEEIFGPVVTVTK(3):0	ALDH4_YEAST	ALDH4_YEAST	sp|P46367|ALDH4_YEAST	sp|P46367|ALDH4_YEAST	sp|P46367|ALDH4_YEAST(374)-sp|P46367|ALDH4_YEAST(419)	12	374	419	16499	7.68613	14248;	File: "Z:\alinden\DATA\2017\06_Jun\170619[Ridhima_TOMTIM]w and wo blocking protein\RAW\TOMTIM-\R_Gomkale_Linden_TOMTIM-_A10b.raw"; ID: "14248"; scans: "16499"	218.272
no	DSS	496	1496	5398.87	1.0036	0	none	Z:\alinden\DATA\2017\06_Jun\170619[Ridhima_TOMTIM]w and wo blocking protein\RAW\TOMTIM-\R_Gomkale_Linden_TOMTIM-_A10b.raw;	1	Intra	null	1.63e-12	LAELIEQDKDVIASIETLDNGKAISSSR(22)-ILKYVDIGKNEGATLITGGER(3):0	ALDH4_YEAST	ALDH4_YEAST	sp|P46367|ALDH4_YEAST	sp|P46367|ALDH4_YEAST	sp|P46367|ALDH4_YEAST(136)-sp|P46367|ALDH4_YEAST(377)	7	136	377	16531	11.7878	14278;	File: "Z:\alinden\DATA\2017\06_Jun\170619[Ridhima_TOMTIM]w and wo blocking protein\RAW\TOMTIM-\R_Gomkale_Linden_TOMTIM-_A10b.raw"; ID: "14278"; scans: "16531"	185.821
no	DSS	497	1497	3540.99	0.00329	0	none	Z:\alinden\DATA\2017\06_Jun\170619[Ridhima_TOMTIM]w and wo blocking protein\RAW\TOMTIM-\R_Gomkale_Linden_TOMTIM-_A10b.raw;	1	Intra	null	5.42e-11	IVKEEIFGPVVTVTKFK(15)-GYFIKPTVFGDVK(5):0	ALDH4_YEAST	ALDH4_YEAST	sp|P46367|ALDH4_YEAST	sp|P46367|ALDH4_YEAST	sp|P46367|ALDH4_YEAST(431)-sp|P46367|ALDH4_YEAST(404)	4	431	404	16624	10.266	14366;	File: "Z:\alinden\DATA\2017\06_Jun\170619[Ridhima_TOMTIM]w and wo blocking protein\RAW\TOMTIM-\R_Gomkale_Linden_TOMTIM-_A10b.raw"; ID: "14366"; scans: "16624"	0.928854
no	DSS	498	1498	3540.99	0.00801	0	none	Z:\alinden\DATA\2017\06_Jun\170619[Ridhima_TOMTIM]w and wo blocking protein\RAW\TOMTIM-\R_Gomkale_Linden_TOMTIM-_A10b.raw;	1	Intra	null	1.56e-08	IVKEEIFGPVVTVTKFK(15)-GYFIKPTVFGDVK(5):0	ALDH4_YEAST	ALDH4_YEAST	sp|P46367|ALDH4_YEAST	sp|P46367|ALDH4_YEAST	sp|P46367|ALDH4_YEAST(431)-sp|P46367|ALDH4_YEAST(404)	4	431	404	16637	7.80688	14379;	File: "Z:\alinden\DATA\2017\06_Jun\170619[Ridhima_TOMTIM]w and wo blocking protein\RAW\TOMTIM-\R_Gomkale_Linden_TOMTIM-_A10b.raw"; ID: "14379"; scans: "16637"	2.26143
no	DSS	499	1499	4958.63	2.01154	0	none	Z:\alinden\DATA\2017\06_Jun\170619[Ridhima_TOMTIM]w and wo blocking protein\RAW\TOMTIM-\R_Gomkale_Linden_TOMTIM-_A10b.raw;	1	Inter	null	3.24e-10	LQFALPHETLYSGSEVTQVNLPAKSGR(24)-KAGISYAAYLNVAAQAIR(1):0	ATPD_YEAST	ATP5E_YEAST	sp|Q12165|ATPD_YEAST	sp|P21306|ATP5E_YEAST	sp|Q12165|ATPD_YEAST(57)-sp|P21306|ATP5E_YEAST(6)	1	57	6	16723	9.48945	14460;	File: "Z:\alinden\DATA\2017\06_Jun\170619[Ridhima_TOMTIM]w and wo blocking protein\RAW\TOMTIM-\R_Gomkale_Linden_TOMTIM-_A10b.raw"; ID: "14460"; scans: "16723"	405.418
no	DSS	500	1500	3977.27	0.01896	0	none	Z:\alinden\DATA\2017\06_Jun\170619[Ridhima_TOMTIM]w and wo blocking protein\RAW\TOMTIM-\R_Gomkale_Linden_TOMTIM-_A10b.raw;	1	Intra	null	1.96e-06	RILPEIASTYGVLLNDPQLKIPVSR(20)-FLDKLGLSR(4):0	MS116_YEAST	MS116_YEAST	sp|P15424|MS116_YEAST	sp|P15424|MS116_YEAST	sp|P15424|MS116_YEAST(569)-sp|P15424|MS116_YEAST(579)	2	569	579	16956	5.70774	14680;	File: "Z:\alinden\DATA\2017\06_Jun\170619[Ridhima_TOMTIM]w and wo blocking protein\RAW\TOMTIM-\R_Gomkale_Linden_TOMTIM-_A10b.raw"; ID: "14680"; scans: "16956"	4.76586
no	DSS	501	1501	3265.83	0.00038	0	none	Z:\alinden\DATA\2017\06_Jun\170619[Ridhima_TOMTIM]w and wo blocking protein\RAW\TOMTIM-\R_Gomkale_Linden_TOMTIM-_A10b.raw;	1	Intra	null	5.65e-09	IVKEEIFGPVVTVTK(3)-GYFIKPTVFGDVK(5):0	ALDH4_YEAST	ALDH4_YEAST	sp|P46367|ALDH4_YEAST	sp|P46367|ALDH4_YEAST	sp|P46367|ALDH4_YEAST(419)-sp|P46367|ALDH4_YEAST(404)	15	419	404	17196	8.24795	14906;	File: "Z:\alinden\DATA\2017\06_Jun\170619[Ridhima_TOMTIM]w and wo blocking protein\RAW\TOMTIM-\R_Gomkale_Linden_TOMTIM-_A10b.raw"; ID: "14906"; scans: "17196"	0.116321
no	DSS	502	1502	3265.83	0.00415	0	none	Z:\alinden\DATA\2017\06_Jun\170619[Ridhima_TOMTIM]w and wo blocking protein\RAW\TOMTIM-\R_Gomkale_Linden_TOMTIM-_A10b.raw;	1	Intra	null	1.13e-11	IVKEEIFGPVVTVTK(3)-GYFIKPTVFGDVK(5):0	ALDH4_YEAST	ALDH4_YEAST	sp|P46367|ALDH4_YEAST	sp|P46367|ALDH4_YEAST	sp|P46367|ALDH4_YEAST(419)-sp|P46367|ALDH4_YEAST(404)	15	419	404	17197	10.9469	14907;	File: "Z:\alinden\DATA\2017\06_Jun\170619[Ridhima_TOMTIM]w and wo blocking protein\RAW\TOMTIM-\R_Gomkale_Linden_TOMTIM-_A10b.raw"; ID: "14907"; scans: "17197"	1.27034
no	DSS	503	1503	5424.81	1.00453	0	none	Z:\alinden\DATA\2017\06_Jun\170619[Ridhima_TOMTIM]w and wo blocking protein\RAW\TOMTIM-\R_Gomkale_Linden_TOMTIM-_A10b.raw;	1	Intra	null	1.11e-11	IATYQERDPANLPWGSSNVDIAIDSTGVFKELDTAQK(30)-AVGKVLPELQGK(4):0	G3P3_YEAST	G3P3_YEAST	sp|P00359|G3P3_YEAST	sp|P00359|G3P3_YEAST	sp|P00359|G3P3_YEAST(101)-sp|P00359|G3P3_YEAST(217)	1	101	217	17263	10.9547	14970;	File: "Z:\alinden\DATA\2017\06_Jun\170619[Ridhima_TOMTIM]w and wo blocking protein\RAW\TOMTIM-\R_Gomkale_Linden_TOMTIM-_A10b.raw"; ID: "14970"; scans: "17263"	185.105
no	DSS	504	1504	3265.83	0.0021	0	none	Z:\alinden\DATA\2017\06_Jun\170619[Ridhima_TOMTIM]w and wo blocking protein\RAW\TOMTIM-\R_Gomkale_Linden_TOMTIM-_A10b.raw;	1	Intra	null	3.17e-14	IVKEEIFGPVVTVTK(3)-GYFIKPTVFGDVK(5):0	ALDH4_YEAST	ALDH4_YEAST	sp|P46367|ALDH4_YEAST	sp|P46367|ALDH4_YEAST	sp|P46367|ALDH4_YEAST(419)-sp|P46367|ALDH4_YEAST(404)	15	419	404	17321	13.4989	15024;	File: "Z:\alinden\DATA\2017\06_Jun\170619[Ridhima_TOMTIM]w and wo blocking protein\RAW\TOMTIM-\R_Gomkale_Linden_TOMTIM-_A10b.raw"; ID: "15024"; scans: "17321"	0.642824
no	DSS	505	1505	3265.83	0.00376	0	none	Z:\alinden\DATA\2017\06_Jun\170619[Ridhima_TOMTIM]w and wo blocking protein\RAW\TOMTIM-\R_Gomkale_Linden_TOMTIM-_A10b.raw;	1	Intra	null	1.49e-15	IVKEEIFGPVVTVTK(3)-GYFIKPTVFGDVK(5):0	ALDH4_YEAST	ALDH4_YEAST	sp|P46367|ALDH4_YEAST	sp|P46367|ALDH4_YEAST	sp|P46367|ALDH4_YEAST(419)-sp|P46367|ALDH4_YEAST(404)	15	419	404	17322	14.8268	15025;	File: "Z:\alinden\DATA\2017\06_Jun\170619[Ridhima_TOMTIM]w and wo blocking protein\RAW\TOMTIM-\R_Gomkale_Linden_TOMTIM-_A10b.raw"; ID: "15025"; scans: "17322"	1.15096
no	DSS	506	1506	4577.4	0.00384	0	none	Z:\alinden\DATA\2017\06_Jun\170619[Ridhima_TOMTIM]w and wo blocking protein\RAW\TOMTIM-\R_Gomkale_Linden_TOMTIM-_A10b.raw;	1	Intra	null	2.26e-13	VGDPFDESTFQGAQTSQMQLNKILK(22)-IVKEEIFGPVVTVTK(3):0	ALDH4_YEAST	ALDH4_YEAST	sp|P46367|ALDH4_YEAST	sp|P46367|ALDH4_YEAST	sp|P46367|ALDH4_YEAST(374)-sp|P46367|ALDH4_YEAST(419)	12	374	419	17324	12.6459	15027;	File: "Z:\alinden\DATA\2017\06_Jun\170619[Ridhima_TOMTIM]w and wo blocking protein\RAW\TOMTIM-\R_Gomkale_Linden_TOMTIM-_A10b.raw"; ID: "15027"; scans: "17324"	0.838719
no	DSS	507	1507	3290.85	-0.00335	0	none	Z:\alinden\DATA\2017\06_Jun\170619[Ridhima_TOMTIM]w and wo blocking protein\RAW\TOMTIM-\R_Gomkale_Linden_TOMTIM-_A10b.raw;	1	Intra	null	8.57e-05	TLKSDGVAGLYRGFLPSVVGIVVYR(3)-KGGAR(1):0	ADT2_YEAST	ADT2_YEAST	sp|P18239|ADT2_YEAST	sp|P18239|ADT2_YEAST	sp|P18239|ADT2_YEAST(182)-sp|P18239|ADT2_YEAST(164)	1	182	164	17327	4.06702	15030;	File: "Z:\alinden\DATA\2017\06_Jun\170619[Ridhima_TOMTIM]w and wo blocking protein\RAW\TOMTIM-\R_Gomkale_Linden_TOMTIM-_A10b.raw"; ID: "15030"; scans: "17327"	-1.01766
no	DSS	508	1508	5054.57	1.0002	0	none	Z:\alinden\DATA\2017\06_Jun\170619[Ridhima_TOMTIM]w and wo blocking protein\RAW\TOMTIM-\R_Gomkale_Linden_TOMTIM-_A10b.raw;	1	Intra	null	2.98e-06	DPANLPWGSSNVDIAIDSTGVFKELDTAQK(23)-TASGNIIPSSTGAAKAVGK(15):0	G3P3_YEAST	G3P3_YEAST	sp|P00359|G3P3_YEAST	sp|P00359|G3P3_YEAST	sp|P00359|G3P3_YEAST(101)-sp|P00359|G3P3_YEAST(213)	3	101	213	17444	5.52578	15141;	File: "Z:\alinden\DATA\2017\06_Jun\170619[Ridhima_TOMTIM]w and wo blocking protein\RAW\TOMTIM-\R_Gomkale_Linden_TOMTIM-_A10b.raw"; ID: "15141"; scans: "17444"	197.802
no	DSS	509	1509	4276.22	0.0253	0	none	Z:\alinden\DATA\2017\06_Jun\170619[Ridhima_TOMTIM]w and wo blocking protein\RAW\TOMTIM-\R_Gomkale_Linden_TOMTIM-_A10b.raw;	1	Intra	14,C(Carbamidomethyl[C]);	9.83e-05	AIFTESVKNVAAGCNPMDLR(8)-GSQVAVEKVIEFLSANKK(8):0	HSP60_YEAST	HSP60_YEAST	sp|P19882|HSP60_YEAST	sp|P19882|HSP60_YEAST	sp|P19882|HSP60_YEAST(126)-sp|P19882|HSP60_YEAST(147)	5	126	147	17451	4.00745	15148;	File: "Z:\alinden\DATA\2017\06_Jun\170619[Ridhima_TOMTIM]w and wo blocking protein\RAW\TOMTIM-\R_Gomkale_Linden_TOMTIM-_A10b.raw"; ID: "15148"; scans: "17451"	5.91501
no	DSS	510	1510	4577.4	-0.00692	0	none	Z:\alinden\DATA\2017\06_Jun\170619[Ridhima_TOMTIM]w and wo blocking protein\RAW\TOMTIM-\R_Gomkale_Linden_TOMTIM-_A10b.raw;	1	Intra	null	2.64e-11	VGDPFDESTFQGAQTSQMQLNKILK(22)-IVKEEIFGPVVTVTK(3):0	ALDH4_YEAST	ALDH4_YEAST	sp|P46367|ALDH4_YEAST	sp|P46367|ALDH4_YEAST	sp|P46367|ALDH4_YEAST(374)-sp|P46367|ALDH4_YEAST(419)	12	374	419	17455	10.5784	15151;	File: "Z:\alinden\DATA\2017\06_Jun\170619[Ridhima_TOMTIM]w and wo blocking protein\RAW\TOMTIM-\R_Gomkale_Linden_TOMTIM-_A10b.raw"; ID: "15151"; scans: "17455"	-1.51145
no	DSS	511	1511	4276.22	0.02384	0	none	Z:\alinden\DATA\2017\06_Jun\170619[Ridhima_TOMTIM]w and wo blocking protein\RAW\TOMTIM-\R_Gomkale_Linden_TOMTIM-_A10b.raw;	1	Intra	14,C(Carbamidomethyl[C]);	1.4e-06	AIFTESVKNVAAGCNPMDLR(8)-GSQVAVEKVIEFLSANKK(8):0	HSP60_YEAST	HSP60_YEAST	sp|P19882|HSP60_YEAST	sp|P19882|HSP60_YEAST	sp|P19882|HSP60_YEAST(126)-sp|P19882|HSP60_YEAST(147)	5	126	147	17473	5.85387	15168;	File: "Z:\alinden\DATA\2017\06_Jun\170619[Ridhima_TOMTIM]w and wo blocking protein\RAW\TOMTIM-\R_Gomkale_Linden_TOMTIM-_A10b.raw"; ID: "15168"; scans: "17473"	5.57367
no	DSS	512	1512	4389.22	0.00944	0	none	Z:\alinden\DATA\2017\06_Jun\170619[Ridhima_TOMTIM]w and wo blocking protein\RAW\TOMTIM-\R_Gomkale_Linden_TOMTIM-_A10b.raw;	1	Intra	null	3.41e-15	VGDPFDESTFQGAQTSQMQLNKILK(22)-GYFIKPTVFGDVK(5):0	ALDH4_YEAST	ALDH4_YEAST	sp|P46367|ALDH4_YEAST	sp|P46367|ALDH4_YEAST	sp|P46367|ALDH4_YEAST(374)-sp|P46367|ALDH4_YEAST(404)	12	374	404	17563	14.4672	15254;	File: "Z:\alinden\DATA\2017\06_Jun\170619[Ridhima_TOMTIM]w and wo blocking protein\RAW\TOMTIM-\R_Gomkale_Linden_TOMTIM-_A10b.raw"; ID: "15254"; scans: "17563"	2.15022
[truncated: 6,953 more rows]

## Sheet: EDC_pLink2_approach 1
blocking-protein	Cross-Linker	Order	Title	Charge	Precursor_Mass	Peptide	Peptide_Mass	Modifications	Score	Precursor_Mass_Error(Da)	Precursor_Mass_Error(ppm)	Proteins	CSMs	Protein1	Residue1	Protein2	Residue2	Intra_Inter	FileID	Alpha_Matched	Beta_Matched
[truncated: 240 more rows]

[truncated: 4 more sheets: SDA_pLink2_approach 1, DSS_approach 2, EDC_approach 2, DSS_approach 3]
