# Supplementary material for: Mapping protein interactions in the active TOM-TIM23 supercomplex
Source: Nat Commun. 2021 Sep 29;12:5715. doi: 10.1038/s41467-021-26016-1 (PMC8481542; doi:10.1038/s41467-021-26016-1)
Supplement: Supplementary file 3 — Dataset 2 [file 41467_2021_26016_MOESM3_ESM.xlsx]

## Sheet: Approach 1 overview 
EDC
Protein1	Intra_Inter	Protein2	Residue1	Residue2
Tom5	Inter	Tom20	1	90
				182
				183
		Tom40	1	227
Tim23	Inter	Tim17	172	149
		Mgr2	72	2
		Pam18	196	162
Tim44	Inter	Hsp70_Ssc1	161	291
		Tim50	86	108
Tim50	Inter	Hsp70_Ssc1	75	550
		Jac1_superfolderGFP	158	150
Tom22	Inter	Tom20	2	180
				182
				183
Tom70	Inter	Tom20	103	177
				183
SDA
TIM23 complex w/o blocking protein						TIM23 complex w/ blocking protein
Protein1	Intra_Inter	Protein2	Residue1	Residue2		Protein1	Intra_Inter	Protein2	Residue1	Residue2
Hsp70_Ssc1	Inter	Pam16	164	93		Hsp70_Ssc1	Inter	Tim44	445	208
		Tim44	445	208		Jac1	Inter	Mge1	19	108
				209				Tim44	93	157
			448	107		Mgr2	Inter	Tim21	2	174
Mgr2	Inter	Tim21	2	174						178
Pam17	Inter	Tim17	143	40		Pam17	Inter	Tim17	143	40
				45						45
Pam16	Inter	Hsp70_Ssc1	130	602		Pam16	Inter	Hsp70_Ssc1	130	602
		Pam17	76	1		Tim17	Inter	Tim21	150	179
Tim17	Inter	Tim21	141	174					158	217
			158	217					155	217
		Tim23	151	2					157	217
Tim44	Inter	Tim17	166	55		Tim23	Inter	Tim17	78	141
			167	55		Tim44	Inter	Hsp70_Ssc1	64	562
			278	44					356	587
			287	55				Pam17	171	143
			286	55				Tim17	162	55
Tim50	Inter	Tim44	75	82					167	55
									287	55
						Tom20	Inter	Tom70	79	341
						Tom7	Inter	Tom40	2	182
										186
						Tom70	Inter	Tim21	7	160
								Tom40	388	220
								Tom71	344	432
DSS
TIM23 complex w/o blocking protein						TIM23 complex w/ blocking protein
Protein 1	Intra_Inter	Protein 2	Residue 1	Residue 2		Protein 1	Intra_Inter	Protein 2	Residue 1	Residue 2
Hsp70_Ssc1	Inter	Tim44	444	228		Hsp70_Ssc1	Inter	Tim44	574	198
			574	198					444	228
	Inter	Mge1	445	104			Inter	Mge1	445	104
Mgr2	Inter	Tim21	2	161					83	119
				217		Mgr2	Inter	Tim21	2	161
				219		Pam16	Inter	Tim44	34	110
Pam16	Inter	Pam18	89	94			Inter	Pam18	89	94
Pam18	Inter	Pam16	94	109					34	101
Tim21	Inter	Tim50	190	363					89	135
			161	271		Pam18	Inter	Pam16	94	109
			164	271		Tim21	Inter	Tim50	135	476
Tim23	Inter	Tom40	25	148		Tim23	Inter	Tom40	25	148
	Inter	Tom5	25	50			Inter	Tom5	25	50
	Inter	Tim17	190	55		Tim44	Inter	Hsp70_Ssc1	59	514
	Inter	Tim50	66	417					215	514
Tim44	Inter	Hsp70_Ssc1	215	514			Inter	Pam18	64	168
			221	444		Tom22	Inter	Tim21	145	164
				514						135
			59	514						161
			215	445						190
										217
										219
							Inter	Tom20	66	48
						Jac1-sfGFP	Inter	Tim21	125	217
									129	217
									149	217
									149	161
								Tom40	149	147

## Sheet: Approach 2 overview
DSS
TIM23 complex w/o blocking protein						TIM23 complex w/ blocking protein
Protein 1	Intra_Inter	Protein 2	Residue 1	Residue 2		Protein 1	Intra_Inter	Protein 2	Residue 1	Residue 2
Hsp70_Ssc1|Hsp70_Ssc1|Hsp70_Ssc1	Inter-Protein	Mge1|Mge1|Mge1	50	85		Hsp70_Ssc1|Hsp70_Ssc1|Hsp70_Ssc1	Inter-Protein	Mge1|Mge1|Mge1	50	103
				103					53	103
			53	103					150	108
			150	108					161	104
			161	103					268	85
				104					445	104
			445	33				Tim44|Tim44|Tim44	345	192
				104		Jac1|Jac1|Jac1	Inter-Protein	Hsp70_Ssc1|Hsp70_Ssc1|Hsp70_Ssc1	38	344
			544	85		Mge1|Mge1|Mge1	Inter-Protein	Hsp70_Ssc1|Hsp70_Ssc1|Hsp70_Ssc1	119	83
		Pam16|Pam16|Pam16	268	75		Tim17|Tim17|Tim17	Inter-Protein	Tim50|Tim50|Tim50	2	361
		Tim44|Tim44|Tim44	164	142		Tim44|Tim44|Tim44	Inter-Protein	Mge1|Mge1|Mge1	183	104
			268	130		Tim50|Tim50|Tim50	Inter-Protein	Hsp70_Ssc1|Hsp70_Ssc1|Hsp70_Ssc1	71	291
Mge1|Mge1|Mge1	Inter-Protein	Hsp70_Ssc1|Hsp70_Ssc1|Hsp70_Ssc1	119	83				Tom40|Tom40|Tom40	476	148
		Mge1|Mge1|Mge1	79	85		Tom5|Tom5|Tom5	Inter-Protein	Jac1|Jac1|Jac1	1	226
			85	79
Pam16|Pam16|Pam16	Inter-Protein	Pam18|Pam18|Pam18	34	101
		Tim44|Tim44|Tim44	122	256
Tim21|Tim21|Tim21	Inter-Protein	Tim50|Tim50|Tim50	164	361
Tim23|Tim23|Tim23	Inter-Protein	Pam17|Pam17|Pam17	143	194
Tim44|Tim44|Tim44	Inter-Protein	Mge1|Mge1|Mge1	183	104
Tim50|Tim50|Tim50	Inter-Protein	Hsp70_Ssc1|Hsp70_Ssc1|Hsp70_Ssc1	71	291
		Mge1|Mge1|Mge1	53	85
		Tim17|Tim17|Tim17	404	2
		Tim21|Tim21|Tim21	417	164
EDC
sp|P07213|TOM70_YEAST ;sp|P07213|TOM70_YEAST ;Tom70|Tom70|Tom70;Tom70|Tom70|Tom70	Inter-Protein	sp|P35180|TOM20_YEAST ;Tom20|Tom20|Tom20;sp|P35180|TOM20_YEAST ;Tom20|Tom20|Tom20	103;103;103;103	182;182;182;182		Jac1|Jac1|Jac1;Jac1|Jac1|Jac1	Inter-Protein	sp|P80967|TOM5_YEAST ;Tom5|Tom5|Tom5	327;327	1;1
				183;183;183;183					357;357	1;1
			167;167;167;167	180;180;180;180					375;375	1;1
			97;97;97;97	183;183;183;183				sp|Q07914|TIM14_YEAST ;Pam18|Pam18|Pam18	181;181	163;163
sp|P0CS90|HSP77_YEAST ;sp|P0CS90|HSP77_YEAST ;Hsp70_Ssc1|Hsp70_Ssc1|Hsp70_Ssc1;Hsp70_Ssc1|Hsp70_Ssc1|Hsp70_Ssc1	Inter-Protein	sp|P38523|GRPE_YEAST ;Mge1|Mge1|Mge1;sp|P38523|GRPE_YEAST ;Mge1|Mge1|Mge1	56;56;56;56	104;104;104;104		sp|P07213|TOM70_YEAST ;sp|P07213|TOM70_YEAST ;Tom70|Tom70|Tom70;Tom70|Tom70|Tom70	Inter-Protein	sp|P35180|TOM20_YEAST ;Tom20|Tom20|Tom20;sp|P35180|TOM20_YEAST ;Tom20|Tom20|Tom20	103;103;103;103	183;183;183;183
				108;108;108;108					162;162;162;162	182;182;182;182
			72;72;72;72	227;227;227;227						183;183;183;183
sp|P32897|TIM23_YEAST ;sp|P32897|TIM23_YEAST ;Tim23|Tim23|Tim23;Tim23|Tim23|Tim23	Inter-Protein	sp|Q02776|TIM50_YEAST ;Tim50|Tim50|Tim50;sp|Q02776|TIM50_YEAST ;Tim50|Tim50|Tim50	74;74;74;74	251;251;251;251					167;167;167;167	180;180;180;180
			75;75;75;75	251;251;251;251						183;183;183;183
sp|P35180|TOM20_YEAST ;sp|P35180|TOM20_YEAST ;Tom20|Tom20|Tom20;Tom20|Tom20|Tom20	Inter-Protein	sp|P07213|TOM70_YEAST ;Tom70|Tom70|Tom70;sp|P07213|TOM70_YEAST ;Tom70|Tom70|Tom70	183;183;183;183	103;103;103;103					97;97;97;97	183;183;183;183
sp|P35180|TOM20_YEAST ;Tom20|Tom20|Tom20	Inter-Protein	Tom71|Tom71|Tom71;Tom71|Tom71|Tom71	183;183	131;131		sp|P0CS90|HSP77_YEAST ;sp|P0CS90|HSP77_YEAST ;Hsp70_Ssc1|Hsp70_Ssc1|Hsp70_Ssc1;Hsp70_Ssc1|Hsp70_Ssc1|Hsp70_Ssc1	Inter-Protein	sp|P38523|GRPE_YEAST ;Mge1|Mge1|Mge1;sp|P38523|GRPE_YEAST ;Mge1|Mge1|Mge1	56;56;56;56	104;104;104;104
sp|P80967|TOM5_YEAST ;sp|P80967|TOM5_YEAST ;Tom5|Tom5|Tom5;Tom5|Tom5|Tom5	Inter-Protein	sp|P35180|TOM20_YEAST ;Tom20|Tom20|Tom20;sp|P35180|TOM20_YEAST ;Tom20|Tom20|Tom20	1;1;1;1	101;101;101;101						108;108;108;108
				182;182;182;182		sp|P23644|TOM40_YEAST ;sp|P23644|TOM40_YEAST ;Tom40|Tom40|Tom40;Tom40|Tom40|Tom40	Inter-Protein	sp|Q02776|TIM50_YEAST ;Tim50|Tim50|Tim50;sp|Q02776|TIM50_YEAST ;Tim50|Tim50|Tim50	56;56;56;56	471;471;471;471
				183;183;183;183		sp|P35180|TOM20_YEAST ;sp|P35180|TOM20_YEAST ;Tom20|Tom20|Tom20;Tom20|Tom20|Tom20	Inter-Protein	sp|P07213|TOM70_YEAST ;Tom70|Tom70|Tom70;sp|P07213|TOM70_YEAST ;Tom70|Tom70|Tom70	183;183;183;183	103;103;103;103
				90;90;90;90		sp|P35180|TOM20_YEAST ;Tom20|Tom20|Tom20	Inter-Protein	Tom71|Tom71|Tom71;Tom71|Tom71|Tom71	177;177	131;131
				98;98;98;98					183;183	131;131
			14;14;14;14	90;90;90;90		sp|P49334|TOM22_YEAST ;sp|P49334|TOM22_YEAST ;Tom22|Tom22|Tom22;Tom22|Tom22|Tom22	Inter-Protein	sp|Q02776|TIM50_YEAST ;Tim50|Tim50|Tim50;sp|Q02776|TIM50_YEAST ;Tim50|Tim50|Tim50	144;144;144;144	348;348;348;348
sp|P80967|TOM5_YEAST ;Tom5|Tom5|Tom5	Inter-Protein	Tom7|Tom7|Tom7;Tom7|Tom7|Tom7	1;1	12;12						361;361;361;361
Tom7|Tom7|Tom7;Tom7|Tom7|Tom7	Inter-Protein	sp|P35180|TOM20_YEAST ;Tom20|Tom20|Tom20	2;2	90;90					145;145;145;145	346;346;346;346
										347;347;347;347
						sp|P80967|TOM5_YEAST ;sp|P80967|TOM5_YEAST ;Tom5|Tom5|Tom5;Tom5|Tom5|Tom5	Inter-Protein	sp|P35180|TOM20_YEAST ;Tom20|Tom20|Tom20;sp|P35180|TOM20_YEAST ;Tom20|Tom20|Tom20	1;1;1;1	101;101;101;101
										90;90;90;90
						sp|P80967|TOM5_YEAST ;Tom5|Tom5|Tom5	Inter-Protein	Jac1|Jac1|Jac1;Jac1|Jac1|Jac1	1;1	300;300
										302;302
						Tim17|Tim17|Tim17	Inter-Protein	Tim21|Tim21|Tim21	149	161
										164
						Tom7|Tom7|Tom7;Tom7|Tom7|Tom7	Inter-Protein	sp|P23644|TOM40_YEAST ;Tom40|Tom40|Tom40	14;14	189;189
								sp|P35180|TOM20_YEAST ;Tom20|Tom20|Tom20	2;2	90;90

## Sheet: Approach 3 overview
DSS
TIM23 complex w/o blocking protein						TIM23 complex w/ blocking protein
Protein 1	Intra_Inter	Protein 2	Residue 1	Residue 2		Protein 1	Intra_Inter	Protein 2	Residue 1	Residue 2
His-Smt3-Tim23_YEAST (Tim23_YEAST)	Inter-Protein	PAM17_YEAST	269 (143)	172		His-Smt3-Tim23_YEAST (Tim23_YEAST)	Inter-Protein	PAM17_YEAST	316 (190)	172
			316 (190)	172				TIM17_YEAST	316 (190)	55
		TIM17_YEAST	316 (190)	55				TIM50_YEAST	151 (25)	365
		TIM21_YEAST	153 (27)	217					153 (27)	365
		TIM50_YEAST	151 (25)	365
			153 (27)	365
HSP77_YEAST	Inter-Protein	TIM14_YEAST	53	130		HSP77_YEAST	Inter-Protein	TIM14_YEAST	161	130
			161	130					518	130
			211	130				TIM44_YEAST	444	228
			444	130					574	198
			514	130		Jac1-superfolderGFP_MODIFIED	Inter-Protein	TIM21_YEAST	149	190
			518	130				TOM5_YEAST	172	1
		TIM44_YEAST	514	215					226	1
			574	198		PAM17_YEAST	Inter-Protein	His-Smt3-Tim23_YEAST (Tim23_YEAST)	172	316 (190)
PAM17_YEAST	Inter-Protein	His-Smt3-Tim23_YEAST (Tim23_YEAST)	172	269 (143)		TIM14_YEAST	Inter-Protein	HSP77_YEAST	130	161
				316 (190)						518
TIM14_YEAST	Inter-Protein	HSP77_YEAST	130	53				TIM16_YEAST	101	34
				161					135	89
				211				TIM44_YEAST	101	256
				444					130	215
				514						221
				518						228
		TIM16_YEAST	101	34		TIM16_YEAST	Inter-Protein	TIM14_YEAST	34	101
			107	34					89	135
			135	89				TIM44_YEAST	34	60
				91						260
			144	91						355
		TIM44_YEAST	101	256		TIM17_YEAST	Inter-Protein	His-Smt3-Tim23_YEAST (Tim23_YEAST)	55	316 (190)
			111	260		TIM21_YEAST	Inter-Protein	Jac1-superfolderGFP_MODIFIED	190	149
			130	215		TIM44_YEAST	Inter-Protein	HSP77_YEAST	198	574
				220				TIM14_YEAST	215	130
				221					221	130
				228					228	130
TIM16_YEAST	Inter-Protein	TIM14_YEAST	34	101					256	101
				107				TIM16_YEAST	60	34
			89	135					260	34
			91	135					355	34
				144		TIM50_YEAST	Inter-Protein	His-Smt3-Tim23_YEAST (Tim23_YEAST)	365	151 (25)
		TIM44_YEAST	34	60						153 (27)
				260		TOM5_YEAST	Inter-Protein	Jac1-superfolderGFP_MODIFIED	1	172
				355						226
TIM17_YEAST	Inter-Protein	His-Smt3-Tim23_YEAST (Tim23_YEAST)	55	316 (190)
TIM21_YEAST	Inter-Protein	His-Smt3-Tim23_YEAST (Tim23_YEAST)	217	153 (27)
TIM23_YEAST	Inter-Protein	TIM50_YEAST	8	365
TIM44_YEAST	Inter-Protein	HSP77_YEAST	198	574
			215	514
		TIM14_YEAST	215	130
			220	130
			221	130
			228	130
			256	101
			260	111
		TIM16_YEAST	60	34
			260	34
			355	34
TIM50_YEAST	Inter-Protein	His-Smt3-Tim23_YEAST (Tim23_YEAST)	365	151 (25)
				153 (27)
		TIM23_YEAST	365	8
